# Supplementary material for: Chromatin Remodeler Smarca5 Is Required for Cancer-Related Processes of Primary Cell Fitness and Immortalization
Source: Cells. 2022 Feb 25;11(5):808. doi: 10.3390/cells11050808 (PMC8909548; doi:10.3390/cells11050808)
Supplement: Supplementary file 1 [file cells-11-00808-s001.zip › Thakur_S_Supplementary_Tables_Smarca5_Cells_R2.xlsx]

## Sheet: List of Suppl Tables
Supplementary Table S1: Differentially upregulated genes assessed by RNA-seq based on genotype - PTM_RNA_Genotype_Up
Supplementary Table S2: Differentially downregulated genes assessed by RNA-seq based on genotype - PTM_RNA_Genotype_Down
Supplementary Table S3: Differentially upnregulated genes assessed by RNA-seq based on protein levels - PTM_RNA_Protein-Level_Up
Supplementary Table S4: Differentially downregulated genes assessed by RNA-seq based on protein levels - PTM_RNA_Protein-Level_Down
Supplementary Table S5: Genes exclusive to ONE-WAY-ANOVA analysis, not present in PTM_Genotype Tables S1 and S2 - One-way_ANOVA_exclusive_gene_list
Supplementary Table S6: Differential higher accesibility sites accessed by ATAC-seq - PTM_ATAC_HASs
Supplementary Table S7: Differential lower accesibility sites accessed by ATAC-seq - PTM_ATAC_LASs
Supplementary Table S8: Gene Ontology analysis on downregulated genes in Smarca5 knockouts
Supplementary Table S9: Gene Ontology analysis on upwnregulated genes in Smarca5 knockouts
Supplementary Table S10: Gradually deregulated Cancer driver genes, Epigenetic regulator genes and Trp53 targets
Supplementary Table S11: ATAC-seq and RNA-seq overlap in gene promoters - Proximal_element_overlap
Supplementary Table S12: ATAC-seq and RNA-seq overlap in gene enhancers - Distal_element_overlap_Up
Supplementary Table S13: ATAC-seq and RNA-seq overlap in gene enhancers - Distal_element_overlap_Down
Supplementary Table S14: Immunoblot densitometry

## Sheet: Suppl_Table_S1
PTM_RNA_Genotype_Up															Normalized RNA-seq read count values								PTM significance		Log2 transformed normalized RNA-seq read count values
Gene.name	Gene.description	Bailey_Cancer	Bailey_Role	is_Bailey	Census_Cancer	Census_Role	Census_MutationTypes	is_Census	Intogen_Cancer	Intogen_Role	is_Intogen	is_driver	is_ERG	ERG_function	hemiZ_WT_rep1	hemiZ_WT_rep2	hemiZ_sKO_rep1	hemiZ_sKO_rep2	homoZ_WT_rep1	homoZ_WT_rep2	homoZ_sKO_rep1	homoZ_sKO_rep2	R values	p Values	hemiZ_WT_rep1	hemiZ_WT_rep2	hemiZ_sKO_rep1	hemiZ_sKO_rep2	homoZ_WT_rep1	homoZ_WT_rep2	homoZ_sKO_rep1	homoZ_sKO_rep2
0610011F06Rik	NA	NA	NA	0	NA	NA	NA	0	NA	NA	0	0	0	NA	220.322	198.936	242.329	222.792	207.745	202.834	228.999	228.023	0.773232	0.0244197	0.0717743	-0.0755329	0.209129	0.0878642	0.017154	-0.0173604	0.157684	0.15152
1110008P14Rik	RIKEN cDNA 1110008P14 gene [Source:MGI Symbol;Acc:MGI:1920987]	NA	NA	0	NA	NA	NA	0	NA	NA	0	0	0	NA	292.079	300.705	338.651	360.781	283.668	310.004	360.681	367.035	0.915325	0.00142299	-0.0211492	0.0208436	0.192292	0.283618	-0.065462	0.0626202	0.281056	0.306252
1110034G24Rik	NA	NA	NA	0	NA	NA	NA	0	NA	NA	0	0	0	NA	71.7947	70.1128	72.7878	69.9932	67.0611	64.2902	71.2534	69.6415	0.79294	0.0188898	0.0169976	-0.0172003	0.0368174	-0.0196632	0.0301172	-0.0307593	0.117601	0.0845883
1700003M07Rik	RIKEN cDNA 1700003M07 gene [Source:MGI Symbol;Acc:MGI:1919475]	NA	NA	0	NA	NA	NA	0	NA	NA	0	0	0	NA	145.286	103.039	190.62	160.117	106.918	98.2882	172.892	123.763	0.740488	0.0356304	0.226669	-0.269042	0.618471	0.3669	0.0594326	-0.0619865	0.752793	0.270508
1700016C15Rik	RIKEN cDNA 1700016C15 gene [Source:MGI Symbol;Acc:MGI:1916678]	NA	NA	0	NA	NA	NA	0	NA	NA	0	0	0	NA	4.06823	4.14129	4.26096	4.08796	4.04308	4.0269	4.21826	4.15425	0.78401	0.0212862	-0.0128968	0.0127826	0.0538784	-0.00591704	0.00288856	-0.00289435	0.0640824	0.0420216
1700030J22Rik	RIKEN cDNA 1700030J22 gene [Source:MGI Symbol;Acc:MGI:1916778]	NA	NA	0	NA	NA	NA	0	NA	NA	0	0	0	NA	36.0723	34.927	40.0721	36.6713	38.1313	31.5487	43.6197	39.8619	0.790531	0.0195188	0.023087	-0.0234625	0.174793	0.0468443	0.13023	-0.143163	0.324236	0.194266
1810026J23Rik	NA	NA	NA	0	NA	NA	NA	0	NA	NA	0	0	0	NA	1105.56	1264.93	1389.21	1354.59	1228.09	1224.42	1358.96	1380.94	0.715427	0.0460166	-0.100407	0.0938714	0.229079	0.192678	0.0021583	-0.00216154	0.148245	0.171393
1810062O18Rik	RIKEN cDNA 1810062O18 gene [Source:MGI Symbol;Acc:MGI:1922852]	NA	NA	0	NA	NA	NA	0	NA	NA	0	0	0	NA	13.4919	13.4736	14.5804	13.5651	13.8079	13.6638	15.1647	14.0884	0.710665	0.0481741	0.000978836	-0.0009795	0.112912	0.00878484	0.00754858	-0.00758829	0.14277	0.0365583
2210011C24Rik	NA	NA	NA	0	NA	NA	NA	0	NA	NA	0	0	0	NA	1.49464	1.4994	1.5234	1.4928	1.49251	1.49296	1.55344	1.54151	0.892709	0.00284452	-0.00229423	0.00229059	0.0251984	-0.00407218	-0.000221368	0.000221334	0.0575089	0.046385
2210039B01Rik	RIKEN cDNA 2210039B01 gene [Source:MGI Symbol;Acc:MGI:1920894]	NA	NA	0	NA	NA	NA	0	NA	NA	0	0	0	NA	2.47033	2.44802	2.42511	2.5052	2.45868	2.42631	2.54549	2.52594	0.776191	0.0235328	0.00653055	-0.00656025	-0.0201215	0.0267543	0.00953001	-0.00959338	0.0595897	0.048468
2310022A10Rik	RIKEN cDNA 2310022A10 gene [Source:MGI Symbol;Acc:MGI:1913617]	NA	NA	0	NA	NA	NA	0	NA	NA	0	0	0	NA	433.278	478.632	556.044	486.235	433.577	437.942	510.724	529.375	0.854778	0.00684695	-0.0735974	0.0700245	0.286308	0.0927622	-0.00724267	0.00720649	0.229013	0.280759
2310034G01Rik	RIKEN cDNA 2310034G01 gene [Source:MGI Symbol;Acc:MGI:1922829]	NA	NA	0	NA	NA	NA	0	NA	NA	0	0	0	NA	9.05397	9.70359	9.8383	9.99392	9.16038	9.70251	9.86485	10.2831	0.734555	0.037944	-0.0508498	0.0491184	0.0690095	0.0916504	-0.0420709	0.0408787	0.0648176	0.124726
2310047M10Rik	NA	NA	NA	0	NA	NA	NA	0	NA	NA	0	0	0	NA	440.192	486.786	475.198	496.943	424.268	472.834	488.953	582.928	0.753936	0.0307111	-0.0744018	0.0707522	0.0359927	0.100545	-0.0802961	0.0760617	0.124423	0.378045
2410131K14Rik	NA	NA	NA	0	NA	NA	NA	0	NA	NA	0	0	0	NA	462.458	455.9	511.902	552.508	451.812	433.028	480.813	518.008	0.769391	0.0256016	0.010266	-0.0103396	0.156812	0.26694	0.0303055	-0.0309558	0.120058	0.227558
2900097C17Rik	NA	NA	NA	0	NA	NA	NA	0	NA	NA	0	0	0	NA	10179.3	9107.95	10303.5	10416.6	9440.99	9117.59	9957.72	10945	0.797022	0.0178533	0.0779906	-0.0824489	0.0954806	0.111238	0.0249239	-0.0253621	0.1018	0.238182
4430402I18Rik	NA	NA	NA	0	NA	NA	NA	0	NA	NA	0	0	0	NA	14.0126	14.5186	14.5689	14.982	13.8643	13.7536	14.5082	14.4076	0.844052	0.00840717	-0.0258187	0.0253647	0.0303507	0.0706882	0.00577184	-0.00579502	0.0712682	0.0612252
4833415N18Rik	RIKEN cDNA 4833415N18 gene [Source:MGI Symbol;Acc:MGI:1921011]	NA	NA	0	NA	NA	NA	0	NA	NA	0	0	0	NA	3.0522	2.99261	3.03668	3.0696	3.03609	3.07647	3.16797	3.14393	0.871435	0.00481354	0.0141519	-0.0142921	0.00679852	0.0223555	-0.00956279	0.00949982	0.0517796	0.0407908
4833427G06Rik	NA	NA	NA	0	NA	NA	NA	0	NA	NA	0	0	0	NA	87.293	80.665	91.8061	95.4933	87.5701	83.1388	107.381	94.1418	0.851253	0.00733729	0.0558373	-0.0580857	0.128562	0.185372	0.0369714	-0.0379438	0.331198	0.14137
4921531C22Rik	RIKEN cDNA 4921531C22 gene [Source:MGI Symbol;Acc:MGI:1913980]	NA	NA	0	NA	NA	NA	0	NA	NA	0	0	0	NA	63.0558	68.6434	74.7974	70.555	66.4897	71.9942	77.9429	74.776	0.742463	0.0348796	-0.0625461	0.0599468	0.183813	0.0995738	-0.0585163	0.0562351	0.170771	0.110928
4930404N11Rik	RIKEN cDNA 4930404N11 gene [Source:MGI Symbol;Acc:MGI:1921072]	NA	NA	0	NA	NA	NA	0	NA	NA	0	0	0	NA	102.668	94.8164	120.134	127.575	94.6553	86.8559	130.977	115.031	0.918858	0.00125564	0.0562456	-0.0585277	0.282904	0.369605	0.060696	-0.0633621	0.52925	0.341963
4930447F24Rik	RIKEN cDNA 4930447F24 gene [Source:MGI Symbol;Acc:MGI:1924123]	NA	NA	0	NA	NA	NA	0	NA	NA	0	0	0	NA	4.17878	4.10849	4.14471	4.13341	4.17081	4.143	4.23381	4.26654	0.754474	0.0305235	0.0121849	-0.0122887	0.000373336	-0.00356498	0.00481721	-0.00483335	0.0264457	0.0375576
4930515G01Rik	RIKEN cDNA 4930515G01 gene [Source:MGI Symbol;Acc:MGI:1914892]	NA	NA	0	NA	NA	NA	0	NA	NA	0	0	0	NA	65.4266	69.543	71.0313	65.7494	62.4299	58.6826	73.8651	71.4168	0.840069	0.00903933	-0.0446858	0.0433432	0.0738931	-0.0375841	0.0439612	-0.045343	0.286617	0.237989
4931431C16Rik	RIKEN cDNA 4931431C16 gene [Source:MGI Symbol;Acc:MGI:1921614]	NA	NA	0	NA	NA	NA	0	NA	NA	0	0	0	NA	34.4466	31.9879	36.9104	34.0094	31.6952	31.0528	38.0614	32.6437	0.716441	0.0455649	0.0524287	-0.0544061	0.152096	0.0340018	0.0146961	-0.0148473	0.278761	0.057237
4933411E08Rik	RIKEN cDNA 4933411E08 gene [Source:MGI Symbol;Acc:MGI:1918317]	NA	NA	0	NA	NA	NA	0	NA	NA	0	0	0	NA	2.88989	2.87648	2.89541	2.99761	2.85556	2.86293	2.93078	2.93083	0.751303	0.0316391	0.00335091	-0.00335872	0.00610423	0.0561478	-0.00185995	0.00185756	0.0356506	0.0356752
4933431G14Rik	RIKEN cDNA 4933431G14 gene [Source:MGI Symbol;Acc:MGI:1918515]	NA	NA	0	NA	NA	NA	0	NA	NA	0	0	0	NA	13.6539	13.922	13.2586	13.3151	13.2474	13.6221	15.3261	15.232	0.720063	0.0439734	-0.0140918	0.0139555	-0.0564759	-0.0503381	-0.0202607	0.0199801	0.190023	0.181139
5031414D18Rik	NA	NA	NA	0	NA	NA	NA	0	NA	NA	0	0	0	NA	29.1664	27.9307	31.0015	32.1001	32.3457	28.3267	35.9421	33.6683	0.819065	0.0128715	0.0308892	-0.031565	0.118924	0.169161	0.0925339	-0.0988782	0.244635	0.150351
5430402O13Rik	RIKEN cDNA 5430402O13 gene [Source:MGI Symbol;Acc:MGI:1918631]	NA	NA	0	NA	NA	NA	0	NA	NA	0	0	0	NA	6.46476	6.40108	6.65516	6.87897	6.30982	6.39863	6.53859	6.88686	0.791929	0.0191521	0.00712306	-0.0071584	0.0490001	0.0967194	-0.0101173	0.0100468	0.0412647	0.116131
5430405H02Rik	RIKEN cDNA 5430405H02 gene [Source:MGI Symbol;Acc:MGI:1921737]	NA	NA	0	NA	NA	NA	0	NA	NA	0	0	0	NA	42.3398	45.7483	47.6862	45.2772	42.9134	44.2958	54.6293	52.9701	0.926744	0.0009296	-0.0569328	0.0547711	0.114622	0.0398377	-0.0230524	0.0226899	0.325194	0.280696
6030408B16Rik	NA	NA	NA	0	NA	NA	NA	0	NA	NA	0	0	0	NA	3.60552	3.6033	3.68302	3.5666	3.56027	3.60141	3.87928	3.65454	0.711432	0.0478227	0.000444437	-0.000444574	0.0311237	-0.0152162	-0.00831122	0.00826362	0.115493	0.0293936
6230400D17Rik	RIKEN cDNA 6230400D17 gene [Source:MGI Symbol;Acc:MGI:1923383]	NA	NA	0	NA	NA	NA	0	NA	NA	0	0	0	NA	36.3306	36.2025	36.8481	37.3233	36.3828	34.3667	36.3532	39.315	0.733141	0.0385086	0.00254569	-0.00255019	0.0229482	0.0414334	0.0405349	-0.0417068	0.0393632	0.15236
9130023H24Rik	RIKEN cDNA 9130023H24 gene [Source:MGI Symbol;Acc:MGI:2442738]	NA	NA	0	NA	NA	NA	0	NA	NA	0	0	0	NA	358.608	371.086	375.04	384.497	321.515	346.232	344.998	374.6	0.723219	0.0426142	-0.0248846	0.0244627	0.0397523	0.07568	-0.054417	0.0524389	0.0472858	0.16605
9230110C19Rik	NA	NA	NA	0	NA	NA	NA	0	NA	NA	0	0	0	NA	193.754	176.962	197.792	198.349	175.519	186.582	198.628	210.656	0.855024	0.00681354	0.0639112	-0.0668742	0.093674	0.0977307	-0.0447652	0.0434179	0.133677	0.218496
9330188P03Rik	RIKEN cDNA 9330188P03 gene [Source:MGI Symbol;Acc:MGI:2686435]	NA	NA	0	NA	NA	NA	0	NA	NA	0	0	0	NA	13.9057	13.9759	14.138	14.769	14.3187	15.2649	15.4542	18.6295	0.72072	0.0436882	-0.00363856	0.00362941	0.0202689	0.0832607	-0.0468971	0.0454205	0.0631984	0.332792
9430083A17Rik	NA	NA	NA	0	NA	NA	NA	0	NA	NA	0	0	0	NA	21.9372	21.0037	20.8055	25.8144	17.9063	18.2441	21.5579	21.1221	0.776351	0.0234855	0.031028	-0.03171	-0.0453863	0.265823	-0.0135448	0.0134188	0.254203	0.224737
9530026P05Rik	RIKEN cDNA 9530026P05 gene [Source:MGI Symbol;Acc:MGI:1924659]	NA	NA	0	NA	NA	NA	0	NA	NA	0	0	0	NA	7.13535	7.37484	7.26569	7.48907	7.30912	7.232	7.87683	7.55113	0.81773	0.0131445	-0.024011	0.0236179	0.00210526	0.0457926	0.0076318	-0.00767238	0.115548	0.0546269
9530068E07Rik	RIKEN cDNA 9530068E07 gene [Source:MGI Symbol;Acc:MGI:2654705]	NA	NA	0	NA	NA	NA	0	NA	NA	0	0	0	NA	9468.86	9605.38	11807.8	12334.4	9525.85	9906.5	10799.5	12154.2	0.737326	0.0368526	-0.0103629	0.010289	0.308114	0.371059	-0.0285413	0.0279876	0.152501	0.322996
9630013K17Rik	RIKEN cDNA 9630013K17 gene [Source:MGI Symbol;Acc:MGI:1926133]	NA	NA	0	NA	NA	NA	0	NA	NA	0	0	0	NA	8.07752	8.09811	8.46092	8.09169	8.24466	8.19119	8.59553	8.65671	0.867781	0.00522075	-0.00183745	0.00183512	0.0650638	0.000690451	0.00468623	-0.0047015	0.0648118	0.0750453
A230001M10Rik	RIKEN cDNA A230001M10 gene [Source:MGI Symbol;Acc:MGI:2443043]	NA	NA	0	NA	NA	NA	0	NA	NA	0	0	0	NA	3.4905	3.4531	3.42013	3.42179	3.4449	3.48651	3.85061	3.65552	0.730735	0.039481	0.00775118	-0.00779305	-0.021631	-0.0209336	-0.00868613	0.00863414	0.151935	0.0769244
A630075F10Rik	NA	NA	NA	0	NA	NA	NA	0	NA	NA	0	0	0	NA	4.89316	4.9766	5.21672	4.95245	4.92472	4.79764	5.03218	5.14711	0.765695	0.0267715	-0.0122481	0.012145	0.0801286	0.00512536	0.0187351	-0.0189816	0.0498757	0.0824549
AI429214	expressed sequence AI429214 [Source:MGI Symbol;Acc:MGI:2142538]	NA	NA	0	NA	NA	NA	0	NA	NA	0	0	0	NA	60.8359	61.992	63.7519	68.9086	61.928	62.9209	68.3089	65.2819	0.725646	0.0415867	-0.0136432	0.0135154	0.0539013	0.166118	-0.0115193	0.011428	0.129964	0.0645735
AI504432	expressed sequence AI504432 [Source:MGI Symbol;Acc:MGI:2139742]	NA	NA	0	NA	NA	NA	0	NA	NA	0	0	0	NA	57.0753	50.1123	63.7778	58.4367	52.2403	47.087	69.8399	54.5692	0.764252	0.0272372	0.0908011	-0.0969021	0.250988	0.124809	0.072972	-0.0768605	0.49186	0.135898
AI597479	expressed sequence AI597479 [Source:MGI Symbol;Acc:MGI:2138299]	NA	NA	0	NA	NA	NA	0	NA	NA	0	0	0	NA	931.671	905.422	983.48	1041.38	841.344	891.292	978.901	924.564	0.786335	0.0206453	0.020468	-0.0207626	0.0985433	0.181066	-0.042201	0.0410016	0.176265	0.0938757
AI607873	NA	NA	NA	0	NA	NA	NA	0	NA	NA	0	0	0	NA	96.8139	88.6777	151.393	232.235	121.058	100.208	168.559	219.833	0.755793	0.0300665	0.0619319	-0.0647102	0.706945	1.32423	0.129919	-0.142787	0.607467	0.990621
Aagab	alpha- and gamma-adaptin binding protein [Source:MGI Symbol;Acc:MGI:1914189]	NA	NA	0	NA	NA	NA	0	NA	NA	0	0	0	NA	857.261	837.636	860.602	847.467	753.845	791.162	830.412	811.685	0.797062	0.0178432	0.0166088	-0.0168022	0.0222203	3.03616e-05	-0.0352736	0.0344317	0.104285	0.0713773
Aar2	AAR2 splicing factor homolog [Source:MGI Symbol;Acc:MGI:1915545]	NA	NA	0	NA	NA	NA	0	NA	NA	0	0	0	NA	643.041	649.256	628.783	643.472	594.398	612.141	647.47	650.322	0.735381	0.0376167	-0.00695598	0.0069226	-0.0393048	-0.00598833	-0.021374	0.0210619	0.102012	0.108353
Abca1	ATP-binding cassette/ sub-family A (ABC1)/ member 1 [Source:MGI Symbol;Acc:MGI:99607]	NA	NA	0	NA	NA	NA	0	NA	NA	0	0	0	NA	3460.2	2794.71	5850.92	8141.86	3234.91	2158.06	5889.2	5648.96	0.839822	0.00907949	0.145867	-0.162291	0.903672	1.38037	0.262646	-0.321345	1.12699	1.06691
Abca12	ATP-binding cassette/ sub-family A (ABC1)/ member 12 [Source:MGI Symbol;Acc:MGI:2676312]	NA	NA	0	NA	NA	NA	0	NA	NA	0	0	0	NA	10.8502	10.3884	11.2612	10.7555	10.7292	10.9061	13.8834	11.2963	0.716599	0.0454948	0.031033	-0.0317152	0.0846648	0.0183821	-0.0118425	0.0117461	0.359968	0.0624598
Abca2	ATP-binding cassette/ sub-family A (ABC1)/ member 2 [Source:MGI Symbol;Acc:MGI:99606]	NA	NA	0	NA	NA	NA	0	NA	NA	0	0	0	NA	957.836	888.887	1199.6	1199.46	912.193	854.124	1084.21	1121.88	0.830762	0.0106319	0.0528831	-0.0548955	0.377589	0.377416	0.0466668	-0.0482269	0.295899	0.345177
Abca3	ATP-binding cassette/ sub-family A (ABC1)/ member 3 [Source:MGI Symbol;Acc:MGI:1351617]	NA	NA	0	NA	NA	NA	0	NA	NA	0	0	0	NA	1219.13	1155.2	1703.1	1759.61	1288.97	1068.92	1758.32	1445.24	0.768072	0.0260154	0.0383298	-0.039376	0.520636	0.567731	0.128725	-0.141345	0.576706	0.293817
Abca4	ATP-binding cassette/ sub-family A (ABC1)/ member 4 [Source:MGI Symbol;Acc:MGI:109424]	NA	NA	0	NA	NA	NA	0	NA	NA	0	0	0	NA	29.4375	26.4215	32.5861	26.3781	25.4198	25.6733	30.453	30.9792	0.762319	0.0278685	0.0758652	-0.0800772	0.222468	-0.082449	-0.00717653	0.00714101	0.253456	0.27817
Abcb9	ATP-binding cassette/ sub-family B (MDR/TAP)/ member 9 [Source:MGI Symbol;Acc:MGI:1861729]	NA	NA	0	NA	NA	NA	0	NA	NA	0	0	0	NA	109.117	86.7967	114.333	113.501	103.88	88.523	129.629	119.292	0.83171	0.0104622	0.155656	-0.174504	0.223024	0.212492	0.110789	-0.12001	0.430255	0.310359
Abcg1	ATP binding cassette subfamily G member 1 [Source:MGI Symbol;Acc:MGI:107704]	NA	NA	0	NA	NA	NA	0	NA	NA	0	0	0	NA	176.657	198.7	246.754	327.388	152.765	213.139	285.834	379.179	0.872175	0.00473364	-0.0873146	0.0823304	0.39481	0.802739	-0.260151	0.220329	0.643715	1.05141
Abhd12	abhydrolase domain containing 12 [Source:MGI Symbol;Acc:MGI:1923442]	NA	NA	0	NA	NA	NA	0	NA	NA	0	0	0	NA	1604.35	1479.02	1772.01	1692.87	1474.49	1547.1	1681.24	1730.49	0.834133	0.0100362	0.0574789	-0.0598643	0.200878	0.134962	-0.0350913	0.034258	0.154214	0.19587
Abhd14a	abhydrolase domain containing 14A [Source:MGI Symbol;Acc:MGI:1915894]	NA	NA	0	NA	NA	NA	0	NA	NA	0	0	0	NA	447.141	506.098	566.142	539.393	481.744	478.85	573.709	536.369	0.799412	0.0172633	-0.0921081	0.0865788	0.248326	0.178499	0.00434	-0.0043531	0.256392	0.159299
Abhd4	abhydrolase domain containing 4 [Source:MGI Symbol;Acc:MGI:1915938]	NA	NA	0	NA	NA	NA	0	NA	NA	0	0	0	NA	3224.54	2991.7	4329.65	4253.67	3198.52	2864.24	3875.81	3969.14	0.805668	0.0157772	0.0530521	-0.0550776	0.478207	0.452665	0.0774296	-0.0818221	0.354523	0.388849
Abtb1	ankyrin repeat and BTB (POZ) domain containing 1 [Source:MGI Symbol;Acc:MGI:1933148]	NA	NA	0	NA	NA	NA	0	NA	NA	0	0	0	NA	204.161	223.334	242.146	243.349	224.736	173.819	293.819	268.661	0.885903	0.00340282	-0.0661999	0.0632951	0.179966	0.187117	0.173453	-0.197194	0.560149	0.431007
Acaa1b	acetyl-Coenzyme A acyltransferase 1B [Source:MGI Symbol;Acc:MGI:3605455]	NA	NA	0	NA	NA	NA	0	NA	NA	0	0	0	NA	133.732	119.416	163.678	168.327	118.661	107.335	144.709	137.138	0.793017	0.01887	0.0793649	-0.0839863	0.37088	0.411281	0.0705475	-0.0741755	0.356857	0.279327
Acad8	acyl-Coenzyme A dehydrogenase family/ member 8 [Source:MGI Symbol;Acc:MGI:1914198]	NA	NA	0	NA	NA	NA	0	NA	NA	0	0	0	NA	808.502	766.771	903.248	885.927	733.04	769.74	891.521	790.392	0.739512	0.0360048	0.0377218	-0.0387346	0.197592	0.169658	-0.0356692	0.0348086	0.246706	0.0730066
Acadvl	acyl-Coenzyme A dehydrogenase/ very long chain [Source:MGI Symbol;Acc:MGI:895149]	NA	NA	0	NA	NA	NA	0	NA	NA	0	0	0	NA	2459.18	2452.25	2815.12	2699.67	2158.19	2610.23	2915.68	3169.88	0.88596	0.0033979	0.00203362	-0.00203649	0.197053	0.136639	-0.143689	0.130666	0.290323	0.410921
Acap1	ArfGAP with coiled-coil/ ankyrin repeat and PH domains 1 [Source:MGI Symbol;Acc:MGI:2388270]	NA	NA	0	NA	NA	NA	0	NA	NA	0	0	0	NA	3.36073	3.47794	3.46513	3.45966	3.41852	3.35222	3.51469	3.51477	0.828385	0.0110653	-0.0249417	0.0245178	0.019195	0.0169159	0.0140577	-0.0141961	0.0540827	0.0541177
Acer2	alkaline ceramidase 2 [Source:MGI Symbol;Acc:MGI:1920932]	NA	NA	0	NA	NA	NA	0	NA	NA	0	0	0	NA	60.1506	56.2613	82.3697	61.6152	61.997	55.5877	83.6668	83.9513	0.881324	0.00381551	0.0474118	-0.049023	0.500947	0.0821191	0.0765701	-0.0808629	0.509027	0.513925
Ache	acetylcholinesterase [Source:MGI Symbol;Acc:MGI:87876]	NA	NA	0	NA	NA	NA	0	NA	NA	0	0	0	NA	9.13351	9.35487	9.30698	8.99322	8.66392	8.6173	9.44634	11.2353	0.730673	0.0395064	-0.017378	0.0171711	0.00976614	-0.0397087	0.0038871	-0.0038976	0.128622	0.378839
Ackr3	atypical chemokine receptor 3 [Source:MGI Symbol;Acc:MGI:109562]	NA	NA	0	lipoma	oncogene_fusion	T	1	OV	Act	1	1	0	NA	1096.08	728.609	1091.25	1267.54	737.19	769.022	910.718	1261.53	0.743895	0.0343416	0.264705	-0.324438	0.258325	0.474374	-0.0308157	0.0301712	0.274152	0.744255
Acox1	acyl-Coenzyme A oxidase 1/ palmitoyl [Source:MGI Symbol;Acc:MGI:1330812]	NA	NA	0	NA	NA	NA	0	NA	NA	0	0	0	NA	2976.99	2833.27	3705.01	3885.63	3055.87	3125.48	3645.1	3710.37	0.735236	0.0376739	0.035253	-0.036136	0.350876	0.419544	-0.0163391	0.0161561	0.238038	0.263642
Acox3	acyl-Coenzyme A oxidase 3/ pristanoyl [Source:MGI Symbol;Acc:MGI:1933156]	NA	NA	0	NA	NA	NA	0	NA	NA	0	0	0	NA	967.335	793.743	1322.91	1215	953.957	798.445	1297.17	1041.71	0.720692	0.0437003	0.135628	-0.149715	0.587252	0.464495	0.122663	-0.134069	0.566029	0.249625
Acp6	acid phosphatase 6/ lysophosphatidic [Source:MGI Symbol;Acc:MGI:1931010]	NA	NA	0	NA	NA	NA	0	NA	NA	0	0	0	NA	348.745	339.059	358.182	342.189	338.265	319.644	346.517	367.235	0.774418	0.0240619	0.0201766	-0.0204628	0.0586961	-0.00720562	0.0402653	-0.0414215	0.075038	0.158812
Acsl6	acyl-CoA synthetase long-chain family member 6 [Source:MGI Symbol;Acc:MGI:894291]	NA	NA	0	AML_AEL	fusion	T	1	NA	NA	0	1	0	NA	15.9872	16.2359	17.6892	18.1583	16.8706	16.5365	18.0806	17.7372	0.728327	0.0404691	-0.0111781	0.0110922	0.134773	0.172533	0.0143558	-0.0145001	0.114283	0.0866208
Acvr1c	activin A receptor/ type IC [Source:MGI Symbol;Acc:MGI:2661081]	NA	NA	0	NA	NA	NA	0	NA	NA	0	0	0	NA	1.73794	1.75988	1.77086	1.77741	1.75869	1.73569	1.77791	1.76389	0.71704	0.0452991	-0.00907664	0.00901989	0.0179917	0.023318	0.00946686	-0.00952939	0.0251489	0.0137202
Adam15	a disintegrin and metallopeptidase domain 15 (metargidin) [Source:MGI Symbol;Acc:MGI:1333882]	NA	NA	0	NA	NA	NA	0	NA	NA	0	0	0	NA	4282.15	3883.85	4643.49	4816.82	3879.1	4195.46	4344.59	4962.33	0.747276	0.0330913	0.0687048	-0.072141	0.185581	0.238453	-0.0576612	0.0554449	0.105835	0.297633
Adamts17	a disintegrin-like and metallopeptidase (reprolysin type) with thrombospondin type 1 motif/ 17 [Source:MGI Symbol;Acc:MGI:3588195]	NA	NA	0	NA	NA	NA	0	NA	NA	0	0	0	NA	43.3067	38.854	44.2975	58.4054	40.0644	38.8502	64.95	52.5283	0.872738	0.00467342	0.0761422	-0.0803859	0.108777	0.507652	0.0220276	-0.0223691	0.719037	0.412803
Adamts2	a disintegrin-like and metallopeptidase (reprolysin type) with thrombospondin type 1 motif/ 2 [Source:MGI Symbol;Acc:MGI:1347356]	NA	NA	0	NA	NA	NA	0	NA	NA	0	0	0	NA	1296.55	1225.35	1319.79	2728.41	1503.58	900.427	2445.87	1891.81	0.73422	0.0380775	0.0401705	-0.0413211	0.065795	1.11355	0.322962	-0.416762	1.0249	0.654327
Adamts8	a disintegrin-like and metallopeptidase (reprolysin type) with thrombospondin type 1 motif/ 8 [Source:MGI Symbol;Acc:MGI:1353468]	NA	NA	0	NA	NA	NA	0	NA	NA	0	0	0	NA	5.75011	5.8704	5.74567	5.99674	5.74396	5.78426	6.0461	6.30985	0.814299	0.0138627	-0.015012	0.0148574	-0.0161245	0.0455774	-0.00505178	0.00503415	0.0689067	0.130508
Adamtsl5	ADAMTS-like 5 [Source:MGI Symbol;Acc:MGI:1913798]	NA	NA	0	NA	NA	NA	0	NA	NA	0	0	0	NA	967.54	891.784	1009.62	957.188	993.126	933.898	1120.26	1120.7	0.898713	0.00240442	0.0576149	-0.0600119	0.119041	0.0420964	0.0436746	-0.0450381	0.217464	0.21802
Adap1	ArfGAP with dual PH domains 1 [Source:MGI Symbol;Acc:MGI:2442201]	NA	NA	0	NA	NA	NA	0	NA	NA	0	0	0	NA	11.2014	11.8951	12.3941	12.9005	11.3565	11.4157	12.923	11.9091	0.755012	0.0303367	-0.0439955	0.0426934	0.101983	0.159761	-0.00375518	0.00374544	0.18267	0.064793
Adcy8	adenylate cyclase 8 [Source:MGI Symbol;Acc:MGI:1341110]	NA	NA	0	NA	NA	NA	0	NA	NA	0	0	0	NA	34.6482	33.6831	36.3129	29.2785	34.7698	35.9906	50.3928	77.9721	0.749729	0.0322017	0.0202342	-0.0205221	0.0879353	-0.222705	-0.0251056	0.0246762	0.510275	1.14002
Adgrf2	adhesion G protein-coupled receptor F2 [Source:MGI Symbol;Acc:MGI:2182728]	NA	NA	0	NA	NA	NA	0	NA	NA	0	0	0	NA	2.74839	2.78003	2.87243	2.76451	2.75996	2.76694	2.94058	2.8097	0.732041	0.0389514	-0.00828168	0.00823441	0.0554082	0.000156757	-0.00182405	0.00182174	0.0896304	0.0239458
Adora2a	adenosine A2a receptor [Source:MGI Symbol;Acc:MGI:99402]	NA	NA	0	NA	NA	NA	0	NA	NA	0	0	0	NA	11.7392	11.6007	11.8772	12.1932	12.3387	12.481	13.7306	13.5587	0.960822	0.000145957	0.00853657	-0.00858739	0.0253967	0.0632714	-0.00829014	0.00824278	0.145905	0.127737
Adrb3	adrenergic receptor/ beta 3 [Source:MGI Symbol;Acc:MGI:87939]	NA	NA	0	NA	NA	NA	0	NA	NA	0	0	0	NA	73.7687	66.6035	80.9336	67.6438	59.6814	65.9673	82.119	69.9203	0.721699	0.0432654	0.0718236	-0.0755875	0.205553	-0.0532284	-0.0740423	0.0704271	0.386392	0.154387
Aen	apoptosis enhancing nuclease [Source:MGI Symbol;Acc:MGI:1915298]	NA	NA	0	NA	NA	NA	0	NA	NA	0	0	0	NA	2296.39	2449.2	2645.79	2550.29	2318.85	2535.41	2706.08	2595.44	0.738788	0.0362843	-0.0472191	0.0457225	0.157113	0.104077	-0.0658427	0.0629684	0.156954	0.0967318
Aff4	AF4/FMR2 family/ member 4 [Source:MGI Symbol;Acc:MGI:2136171]	NA	NA	0	ALL	oncogene_fusion	T	1	NA	NA	0	1	1		15547.8	15135.6	17828.6	16134.4	16812.5	15603.4	17755.5	19299.3	0.817298	0.0132336	0.0192525	-0.0195129	0.216737	0.0726838	0.0528331	-0.0548417	0.131571	0.251848
Agfg1	ArfGAP with FG repeats 1 [Source:MGI Symbol;Acc:MGI:1333754]	NA	NA	0	NA	NA	NA	0	NA	NA	0	0	0	NA	3105.87	2913.2	3203.87	3120.45	3249.96	3196.88	3315.78	3620.21	0.732631	0.0387136	0.0454569	-0.0469359	0.0902754	0.0522126	0.0118303	-0.0119281	0.0407559	0.167483
Ahi1	Abelson helper integration site 1 [Source:MGI Symbol;Acc:MGI:87971]	NA	NA	0	NA	NA	NA	0	NA	NA	0	0	0	NA	978.958	852.642	1008.39	1052.17	947.314	881.453	1020.1	1050.96	0.764628	0.0271154	0.0962149	-0.103093	0.138943	0.200261	0.0510429	-0.0529153	0.157842	0.200842
Akap10	A kinase (PRKA) anchor protein 10 [Source:MGI Symbol;Acc:MGI:1890218]	NA	NA	0	NA	NA	NA	0	NA	NA	0	0	0	NA	1118.44	1157.18	1262.09	1157.5	1139.87	1132.67	1208.06	1245.16	0.785856	0.0207763	-0.0247734	0.0243551	0.149556	0.0247524	0.00456728	-0.00458178	0.0883905	0.132028
Akap11	A kinase (PRKA) anchor protein 11 [Source:MGI Symbol;Acc:MGI:2684060]	NA	NA	0	NA	NA	NA	0	NA	NA	0	0	0	NA	5990.83	5624.9	6797.31	6500.88	6199.3	6135.53	7094.11	6616.98	0.751487	0.0315734	0.0447484	-0.0461809	0.226956	0.162628	0.00744003	-0.0074786	0.201956	0.101508
Akap13	A kinase (PRKA) anchor protein 13 [Source:MGI Symbol;Acc:MGI:2676556]	NA	NA	0	NA	NA	NA	0	NA	NA	0	0	0	NA	8385.91	8532.7	9369.94	8846.53	8486.98	8354.33	9358.76	11607	0.829912	0.0107856	-0.0125715	0.0124629	0.147501	0.0645731	0.0113187	-0.0114082	0.152384	0.462985
Akt1s1	AKT1 substrate 1 (proline-rich) [Source:MGI Symbol;Acc:MGI:1914855]	NA	NA	0	NA	NA	NA	0	NA	NA	0	0	0	NA	2680.9	2934.6	3357.28	3402.73	3158.7	3259.01	3564.95	3737.25	0.732822	0.0386367	-0.0666953	0.0637478	0.257876	0.277276	-0.0227285	0.022376	0.151823	0.21992
Aldh3b1	aldehyde dehydrogenase 3 family/ member B1 [Source:MGI Symbol;Acc:MGI:1914939]	NA	NA	0	NA	NA	NA	0	NA	NA	0	0	0	NA	92.0797	97.0077	96.9192	96.9187	89.3079	95.8976	97.7736	100.448	0.763713	0.0274121	-0.0380982	0.0371179	0.0358009	0.0357928	-0.052267	0.0504395	0.0783906	0.117325
Aldh4a1	aldehyde dehydrogenase 4 family/ member A1 [Source:MGI Symbol;Acc:MGI:2443883]	NA	NA	0	NA	NA	NA	0	NA	NA	0	0	0	NA	1622.84	1304.12	2257.02	1953.24	1494.41	1446.78	2034.2	1832.99	0.738543	0.0363789	0.149117	-0.166326	0.62501	0.416459	0.0231737	-0.023552	0.468059	0.317793
Aldh6a1	aldehyde dehydrogenase family 6/ subfamily A1 [Source:MGI Symbol;Acc:MGI:1915077]	NA	NA	0	NA	NA	NA	0	NA	NA	0	0	0	NA	530.963	524.985	701.757	825.826	564.791	521.324	763.798	750.902	0.845561	0.00817529	0.00814414	-0.00819038	0.410505	0.645372	0.0566128	-0.0589254	0.492087	0.467519
Alg11	asparagine-linked glycosylation 11 (alpha-1/2-mannosyltransferase) [Source:MGI Symbol;Acc:MGI:2142632]	NA	NA	0	NA	NA	NA	0	NA	NA	0	0	0	NA	1564.05	1426.21	1719.1	1702.8	1576.74	1564.29	1786.06	1781.88	0.836247	0.00967354	0.0650137	-0.0680823	0.201376	0.187634	0.0057031	-0.00572574	0.185539	0.18216
Alg2	asparagine-linked glycosylation 2 (alpha-1/3-mannosyltransferase) [Source:MGI Symbol;Acc:MGI:1914731]	NA	NA	0	NA	NA	NA	0	NA	NA	0	0	0	NA	1416.71	1232.23	1472.54	1707.86	1160.21	1221.36	1425.79	1563.8	0.840276	0.0090058	0.097128	-0.104142	0.152894	0.366773	-0.0375275	0.036576	0.259845	0.393134
Alkbh5	alkB homolog 5/ RNA demethylase [Source:MGI Symbol;Acc:MGI:2144489]	NA	NA	0	NA	NA	NA	0	NA	NA	0	0	0	NA	4061.86	4081.86	4495.42	4247.85	3999.31	4041.13	4270.84	4469.08	0.855878	0.00669837	-0.00354712	0.00353842	0.142768	0.0610473	-0.00752402	0.00748498	0.0872476	0.152705
Alkbh6	alkB homolog 6 [Source:MGI Symbol;Acc:MGI:2142037]	NA	NA	0	NA	NA	NA	0	NA	NA	0	0	0	NA	228.591	230.183	251.809	270.582	224.943	220.755	266.214	261.534	0.938312	0.000560055	-0.00501462	0.00499725	0.134545	0.238285	0.0134935	-0.0136209	0.256521	0.230931
Alox12	arachidonate 12-lipoxygenase [Source:MGI Symbol;Acc:MGI:87998]	NA	NA	0	NA	NA	NA	0	NA	NA	0	0	0	NA	8.04657	8.14293	8.48047	8.06088	7.94917	8.29477	8.37905	8.80316	0.733115	0.0385193	-0.00861255	0.00856145	0.0671572	-0.00605007	-0.0310255	0.0303724	0.0449566	0.116193
Angpt4	angiopoietin 4 [Source:MGI Symbol;Acc:MGI:1336887]	NA	NA	0	NA	NA	NA	0	NA	NA	0	0	0	NA	100.819	116.517	129.047	100.273	109.672	91.8657	136.379	141.076	0.787629	0.0202935	-0.10816	0.100614	0.247971	-0.115984	0.122143	-0.133448	0.436577	0.485431
Anks1b	ankyrin repeat and sterile alpha motif domain containing 1B [Source:MGI Symbol;Acc:MGI:1924781]	NA	NA	0	NA	NA	NA	0	NA	NA	0	0	0	NA	445.798	398.817	814.533	642.171	461.877	347.911	862.396	491.444	0.720025	0.0439897	0.0780958	-0.0825665	0.94768	0.604663	0.189965	-0.218827	1.09081	0.279483
Anxa8	annexin A8 [Source:MGI Symbol;Acc:MGI:1201374]	NA	NA	0	NA	NA	NA	0	NA	NA	0	0	0	NA	1293.21	1317.56	1553.8	1286.67	721.527	1238.43	1632.65	2170.26	0.808129	0.0152154	-0.0135239	0.0133983	0.251325	-0.0208348	-0.441693	0.337688	0.736397	1.14705
Aox2	aldehyde oxidase 2 [Source:MGI Symbol;Acc:MGI:3529596]	NA	NA	0	NA	NA	NA	0	NA	NA	0	0	0	NA	2.00369	1.99902	2.05504	2.01669	2.02723	2.03594	2.06581	2.06584	0.778363	0.0228946	0.00168253	-0.0016845	0.0381883	0.011012	-0.00309557	0.00308894	0.0240962	0.02412
Ap1b1	adaptor protein complex AP-1/ beta 1 subunit [Source:MGI Symbol;Acc:MGI:1096368]	NA	NA	0	NA	NA	NA	0	NA	NA	0	0	0	NA	2281.06	2282.41	2646.7	2869.88	2131.87	2030.52	2289.83	2438.19	0.716205	0.0456696	-0.000427061	0.000426934	0.214063	0.33086	0.0347066	-0.0355621	0.137833	0.228401
Ap5b1	adaptor-related protein complex 5/ beta 1 subunit [Source:MGI Symbol;Acc:MGI:2685808]	NA	NA	0	NA	NA	NA	0	NA	NA	0	0	0	NA	157.539	151.654	165.805	189.02	165.551	144.247	190.678	173.989	0.775238	0.0238163	0.0272026	-0.0277254	0.100987	0.290032	0.0959503	-0.102789	0.299808	0.167665
Aplp1	amyloid beta (A4) precursor-like protein 1 [Source:MGI Symbol;Acc:MGI:88046]	NA	NA	0	NA	NA	NA	0	NA	NA	0	0	0	NA	1651.28	1412.62	1798.97	1726.85	1204.37	1430.22	1560.43	2006.79	0.819564	0.0127706	0.108218	-0.116999	0.231799	0.172772	-0.129296	0.118655	0.244362	0.607308
Apol9b	apolipoprotein L 9b [Source:MGI Symbol;Acc:MGI:1919148]	NA	NA	0	NA	NA	NA	0	NA	NA	0	0	0	NA	68.9915	57.1119	82.22	94.0114	70.4758	50.433	111.544	73.5088	0.756952	0.0296687	0.129883	-0.142743	0.382953	0.5763	0.221281	-0.26148	0.88369	0.282071
Arfgef3	ARFGEF family member 3 [Source:MGI Symbol;Acc:MGI:106387]	NA	NA	0	NA	NA	NA	0	NA	NA	0	0	0	NA	5.87194	5.89287	5.8804	5.98153	5.68598	5.67634	5.8514	5.89685	0.910288	0.00168576	-0.00256853	0.00256397	-0.000490495	0.0241086	0.00122336	-0.0012244	0.0425954	0.0537577
Arhgef12	Rho guanine nucleotide exchange factor (GEF) 12 [Source:MGI Symbol;Acc:MGI:1916882]	NA	NA	0	AML	TSG_fusion	T	1	BRCA_ST	Act	1	1	0	NA	8285.44	7916.67	9138.45	8656	8192.64	8604.53	9229.51	9466.32	0.859894	0.0061734	0.0324678	-0.0332153	0.17384	0.0955908	-0.0358176	0.0349498	0.136107	0.172657
Arhgef3	Rho guanine nucleotide exchange factor (GEF) 3 [Source:MGI Symbol;Acc:MGI:1918954]	NA	NA	0	NA	NA	NA	0	NA	NA	0	0	0	NA	112.855	97.2024	117.373	126.424	95.9633	116.593	135.701	192.488	0.837888	0.00939788	0.103689	-0.111723	0.16031	0.267481	-0.147293	0.133638	0.352582	0.856925
Arhgef6	Rac/Cdc42 guanine nucleotide exchange factor (GEF) 6 [Source:MGI Symbol;Acc:MGI:1920591]	NA	NA	0	NA	NA	NA	0	NA	NA	0	0	0	NA	278.958	235.259	309.113	370.656	225.917	259.814	377.816	383.292	0.931317	0.000768848	0.117672	-0.128129	0.26576	0.527706	-0.104366	0.0973223	0.637529	0.658286
Arl2	ADP-ribosylation factor-like 2 [Source:MGI Symbol;Acc:MGI:1928393]	NA	NA	0	NA	NA	NA	0	NA	NA	0	0	0	NA	714.911	760.282	798.226	752.918	702.519	699.804	816.426	842.177	0.928365	0.000870319	-0.0450683	0.043703	0.113966	0.0296603	0.00279043	-0.00279583	0.219576	0.264377
Arl5b	ADP-ribosylation factor-like 5B [Source:MGI Symbol;Acc:MGI:1923119]	NA	NA	0	NA	NA	NA	0	NA	NA	0	0	0	NA	963.665	794.574	1243.56	1197.24	1104.32	817.614	1400.94	1520.25	0.868593	0.00512841	0.132472	-0.145878	0.500341	0.44558	0.200601	-0.233069	0.543834	0.661748
Arl6	ADP-ribosylation factor-like 6 [Source:MGI Symbol;Acc:MGI:1927136]	NA	NA	0	NA	NA	NA	0	NA	NA	0	0	0	NA	220.355	251.481	274.208	257.437	258.41	262.265	291.685	289.622	0.742866	0.0347276	-0.0984551	0.0921633	0.216988	0.125934	-0.0107212	0.0106421	0.164028	0.153788
Arl8b	ADP-ribosylation factor-like 8B [Source:MGI Symbol;Acc:MGI:1914416]	NA	NA	0	NA	NA	NA	0	NA	NA	0	0	0	NA	3855.38	3826.91	4057.87	4616.07	3873.14	4076.92	4173.49	4930.1	0.707183	0.0497894	0.00533682	-0.00535663	0.0791883	0.265128	-0.0374613	0.0365131	0.0702879	0.310652
Armc7	armadillo repeat containing 7 [Source:MGI Symbol;Acc:MGI:2679719]	NA	NA	0	NA	NA	NA	0	NA	NA	0	0	0	NA	116.425	136.064	128.222	145.101	112.626	123.999	130.866	148.102	0.732275	0.0388571	-0.116815	0.108061	0.0224167	0.200832	-0.0710621	0.0677255	0.145496	0.323995
Arsg	arylsulfatase G [Source:MGI Symbol;Acc:MGI:1921258]	NA	NA	0	NA	NA	NA	0	NA	NA	0	0	0	NA	161.337	142.295	175.145	181.891	155.43	116.09	188.075	174.789	0.832522	0.0103182	0.0877555	-0.0934411	0.206222	0.260749	0.195209	-0.225819	0.47025	0.364554
Arsi	arylsulfatase i [Source:MGI Symbol;Acc:MGI:2670959]	NA	NA	0	NA	NA	NA	0	NA	NA	0	0	0	NA	151.713	133.423	161.458	233.09	131.712	137.29	202.816	184.954	0.816394	0.0134214	0.0896947	-0.095643	0.179511	0.709237	-0.0302286	0.0296082	0.592553	0.459551
Artn	artemin [Source:MGI Symbol;Acc:MGI:1333791]	NA	NA	0	NA	NA	NA	0	NA	NA	0	0	0	NA	60.6816	55.0034	80.703	75.0455	63.0546	52.9038	99.53	64.1756	0.729647	0.0399257	0.0691296	-0.0726095	0.480492	0.375635	0.121066	-0.132163	0.779597	0.14649
Ascl3	achaete-scute family bHLH transcription factor 3 [Source:MGI Symbol;Acc:MGI:1928820]	NA	NA	0	NA	NA	NA	0	NA	NA	0	0	0	NA	1.44808	1.42241	1.45282	1.44661	1.42283	1.42326	1.43505	1.47038	0.745005	0.0339281	0.0128443	-0.0129597	0.0175597	0.0113815	-0.000218636	0.000218603	0.0121215	0.0472078
Asgr1	asialoglycoprotein receptor 1 [Source:MGI Symbol;Acc:MGI:88081]	NA	NA	0	NA	NA	NA	0	NA	NA	0	0	0	NA	7.93932	7.76354	8.27793	7.62549	8.05658	7.84508	8.83657	9.01711	0.828471	0.0110495	0.0160592	-0.01624	0.0763147	-0.0421261	0.0190625	-0.0193177	0.152381	0.18156
Asna1	NA	NA	NA	0	NA	NA	NA	0	NA	NA	0	0	0	NA	1168.39	1238.16	1336.17	1412.13	1241.42	1283.12	1374.2	1421.8	0.757416	0.0295102	-0.0424437	0.0412306	0.151138	0.230909	-0.0240282	0.0236345	0.122575	0.171699
Atad1	ATPase family/ AAA domain containing 1 [Source:MGI Symbol;Acc:MGI:1915229]	NA	NA	0	NA	NA	NA	0	NA	NA	0	0	0	NA	3112.34	2970.13	3056.17	3030.48	3015.52	2954.8	3088.15	3315.86	0.706872	0.0499353	0.033342	-0.0341309	0.0070639	-0.00511018	0.0145981	-0.0147474	0.0489342	0.151577
Atf6	activating transcription factor 6 [Source:MGI Symbol;Acc:MGI:1926157]	NA	NA	0	NA	NA	NA	0	NA	NA	0	0	0	NA	2725.52	3173.44	3408.43	2930.85	3185.3	3182.24	3544.82	4314.91	0.7477	0.0329364	-0.113929	0.105587	0.208644	-0.0091428	0.000691835	-0.000692167	0.154976	0.438595
Atf6b	activating transcription factor 6 beta [Source:MGI Symbol;Acc:MGI:105121]	NA	NA	0	NA	NA	NA	0	NA	NA	0	0	0	NA	1356.34	1372.72	1443.84	1455.51	1332.44	1308.04	1573.08	1669.74	0.959527	0.000160747	-0.00868889	0.00863688	0.0815097	0.0931167	0.0132718	-0.013395	0.252796	0.338823
Atg13	autophagy related 13 [Source:MGI Symbol;Acc:MGI:1196429]	NA	NA	0	NA	NA	NA	0	NA	NA	0	0	0	NA	981.718	1016.36	1235.94	1210.52	1042.78	896.796	1098.31	1240.46	0.782117	0.0218175	-0.0252338	0.0248	0.306989	0.277009	0.104691	-0.112887	0.179552	0.355139
Atg16l1	autophagy related 16-like 1 (S. cerevisiae) [Source:MGI Symbol;Acc:MGI:1924290]	NA	NA	0	NA	NA	NA	0	NA	NA	0	0	0	NA	1104.55	1107.64	1131.46	1076.17	1099.91	1091.6	1166.44	1239.49	0.771518	0.0249428	-0.0020178	0.00201498	0.0327141	-0.0395711	0.00546403	-0.00548481	0.0901838	0.177822
Atg2a	autophagy related 2A [Source:MGI Symbol;Acc:MGI:1916291]	NA	NA	0	NA	NA	NA	0	NA	NA	0	0	0	NA	1656.84	1642.46	1676.36	1572.96	1642.41	1608.4	1812.16	1958.88	0.763521	0.0274747	0.00627404	-0.00630145	0.0231701	-0.0686734	0.0150158	-0.0151737	0.156906	0.269228
Atg7	autophagy related 7 [Source:MGI Symbol;Acc:MGI:1921494]	NA	NA	0	NA	NA	NA	0	RCCC	LoF	1	1	0	NA	828.147	846.818	957.58	1019.56	884.576	852.259	949.559	1110.6	0.805227	0.0158793	-0.0161719	0.0159927	0.193334	0.283815	0.026597	-0.0270966	0.128869	0.354873
Atg9b	autophagy related 9B [Source:MGI Symbol;Acc:MGI:2685420]	NA	NA	0	NA	NA	NA	0	NA	NA	0	0	0	NA	18.8446	18.3521	26.1274	18.8349	19.4089	17.6749	29.9755	21.1479	0.724916	0.0418942	0.0189768	-0.0192297	0.490386	0.0182336	0.0659293	-0.069087	0.692998	0.18973
Atp13a2	ATPase type 13A2 [Source:MGI Symbol;Acc:MGI:1922022]	NA	NA	0	NA	NA	NA	0	NA	NA	0	0	0	NA	886.834	767.588	1123.86	1012.04	860.769	737.318	1113.45	908.839	0.737377	0.0368325	0.100409	-0.107923	0.442137	0.290933	0.107352	-0.115987	0.478694	0.185751
Atp6ap1	ATPase/ H+ transporting/ lysosomal accessory protein 1 [Source:MGI Symbol;Acc:MGI:109629]	NA	NA	0	NA	NA	NA	0	NA	NA	0	0	0	NA	6444.44	5825.07	7551.52	6565.93	6083.8	6181.68	7197	7331.67	0.834495	0.00997339	0.0710497	-0.0747308	0.299761	0.0979921	-0.0115596	0.0114677	0.230862	0.25761
Atp6v0b	ATPase/ H+ transporting/ lysosomal V0 subunit B [Source:MGI Symbol;Acc:MGI:1890510]	NA	NA	0	NA	NA	NA	0	NA	NA	0	0	0	NA	1564.21	1603.61	2183.63	1862.04	1794.06	1613.16	2049.29	2268.82	0.816191	0.0134637	-0.0180554	0.0178322	0.46324	0.233392	0.0746315	-0.0787039	0.266527	0.413346
Atp6v0d1	ATPase/ H+ transporting/ lysosomal V0 subunit D1 [Source:MGI Symbol;Acc:MGI:1201778]	NA	NA	0	NA	NA	NA	0	NA	NA	0	0	0	NA	3317.15	3386.3	4083.76	4275.79	3490.41	3472.18	3832.28	4427.79	0.754589	0.0304833	-0.0149603	0.0148067	0.284996	0.351288	0.00377195	-0.00378183	0.138581	0.346965
Atp6v1b2	ATPase/ H+ transporting/ lysosomal V1 subunit B2 [Source:MGI Symbol;Acc:MGI:109618]	NA	NA	0	NA	NA	NA	0	NA	NA	0	0	0	NA	2194.95	2167.27	2458.72	2520.17	2235.69	2117.57	2409.85	2843.09	0.85985	0.00617895	0.00912454	-0.00918262	0.172844	0.208459	0.0386256	-0.0396882	0.146844	0.385364
Atp6v1d	ATPase/ H+ transporting/ lysosomal V1 subunit D [Source:MGI Symbol;Acc:MGI:1921084]	NA	NA	0	NA	NA	NA	0	NA	NA	0	0	0	NA	2061.91	1892.69	2313.24	2285.84	2037.79	2090.14	2300.92	2363.57	0.787775	0.020254	0.0604496	-0.0630937	0.226379	0.209191	-0.0184126	0.0181806	0.156792	0.195547
Atp7a	ATPase/ Cu++ transporting/ alpha polypeptide [Source:MGI Symbol;Acc:MGI:99400]	NA	NA	0	NA	NA	NA	0	NA	NA	0	0	0	NA	2322.61	1871.07	2457.5	2285.48	2066.27	1925.03	2560.9	2404.93	0.831248	0.0105448	0.147531	-0.164354	0.228972	0.124278	0.0501686	-0.0519763	0.35979	0.269137
Atp8b5	ATPase/ class I/ type 8B/ member 5 [Source:MGI Symbol;Acc:MGI:2444287]	NA	NA	0	NA	NA	NA	0	NA	NA	0	0	0	NA	6.28255	6.19205	6.30316	6.59175	6.34096	6.16521	6.50183	6.59835	0.803946	0.016178	0.0104285	-0.0105044	0.0151547	0.0797396	0.0201329	-0.0204178	0.0562778	0.0775371
Atp9a	ATPase/ class II/ type 9A [Source:MGI Symbol;Acc:MGI:1330826]	NA	NA	0	NA	NA	NA	0	NA	NA	0	0	0	NA	1218.6	1128.15	1689.59	2011.63	849.804	980.944	1303.04	1810.99	0.868861	0.00509818	0.0545575	-0.0567021	0.526009	0.777702	-0.107231	0.0998094	0.509452	0.984344
Avl9	AVL9 cell migration associated [Source:MGI Symbol;Acc:MGI:1926187]	NA	NA	0	NA	NA	NA	0	NA	NA	0	0	0	NA	1734.26	1515.8	1839.21	1804.34	1786.27	1660.19	1915.27	1955.26	0.755761	0.0300775	0.0938537	-0.100387	0.178624	0.151007	0.0518359	-0.0537679	0.152428	0.182242
Axin2	axin 2 [Source:MGI Symbol;Acc:MGI:1270862]	PANCAN	tsg	1	colorectalcarcinoma_stomachcarcinoma_hepatocellularcarcinoma	TSG	Mis_F_N	1	HC	LoF	1	1	0	NA	197.567	124.51	192.422	188.351	126.952	130.642	174.087	194.241	0.788148	0.0201535	0.294938	-0.371146	0.256865	0.226017	-0.0208172	0.0205211	0.434715	0.592755
B3gnt6	UDP-GlcNAc:betaGal beta-1/3-N-acetylglucosaminyltransferase 6 (core 3 synthase) [Source:MGI Symbol;Acc:MGI:3039603]	NA	NA	0	NA	NA	NA	0	NA	NA	0	0	0	NA	1.61416	1.59327	1.63013	1.59931	1.59689	1.58641	1.61263	1.62571	0.737785	0.0366736	0.00936358	-0.00942475	0.0235664	-0.00397098	0.0047434	-0.00475904	0.01889	0.030547
B4galnt2	beta-1/4-N-acetyl-galactosaminyl transferase 2 [Source:MGI Symbol;Acc:MGI:1342058]	NA	NA	0	NA	NA	NA	0	NA	NA	0	0	0	NA	11.3615	12.2783	11.8144	12.2613	11.0132	11.0887	14.236	12.1884	0.785264	0.0209391	-0.0570625	0.0548911	-0.000668558	0.0528927	-0.00493823	0.00492138	0.365371	0.14134
B4galt1	UDP-Gal:betaGlcNAc beta 1/4- galactosyltransferase/ polypeptide 1 [Source:MGI Symbol;Acc:MGI:95705]	NA	NA	0	NA	NA	NA	0	NA	NA	0	0	0	NA	5395.52	5354.65	6537.79	6607.59	5753.35	6024.35	6282.77	7412.47	0.714402	0.0464761	0.00547556	-0.00549643	0.282516	0.297838	-0.0335837	0.0328197	0.0934164	0.33197
B630005N14Rik	NA	NA	NA	0	NA	NA	NA	0	NA	NA	0	0	0	NA	1720.34	1661.62	1990.81	1963.99	1614.1	1663.39	1889.33	1842.58	0.826746	0.0113705	0.0248327	-0.0252676	0.235494	0.215931	-0.0218605	0.0215342	0.20528	0.169139
BB557941	expressed sequence BB557941 [Source:MGI Symbol;Acc:MGI:3034820]	NA	NA	0	NA	NA	NA	0	NA	NA	0	0	0	NA	1.53992	1.55974	1.54832	1.53798	1.54817	1.53815	1.60031	1.58804	0.772333	0.0246934	-0.00925292	0.00919395	-0.00140563	-0.0110769	0.00467932	-0.00469455	0.0524623	0.041363
BC022687	NA	NA	NA	0	NA	NA	NA	0	NA	NA	0	0	0	NA	566.043	549.76	683.958	589.028	590.475	572.679	626.322	840.194	0.744541	0.0341004	0.0209014	-0.0212087	0.293897	0.0783271	0.0219063	-0.022244	0.106933	0.530752
BC089491	NA	NA	NA	0	NA	NA	NA	0	NA	NA	0	0	0	NA	2.19876	2.19313	2.28449	2.21268	2.19411	2.19511	2.31919	2.2843	0.912182	0.00158358	0.00184782	-0.00185019	0.0570297	0.0109478	-0.000327836	0.000327761	0.0796616	0.0577929
Bace2	beta-site APP-cleaving enzyme 2 [Source:MGI Symbol;Acc:MGI:1860440]	NA	NA	0	NA	NA	NA	0	NA	NA	0	0	0	NA	131.866	117.093	152.553	195.188	111.797	122.509	176.544	154.642	0.831688	0.0104662	0.0831678	-0.0882571	0.293403	0.648958	-0.0675121	0.0644936	0.591629	0.400542
Bach2	BTB and CNC homology/ basic leucine zipper transcription factor 2 [Source:MGI Symbol;Acc:MGI:894679]	NA	NA	0	NA	NA	NA	0	NA	NA	0	0	0	NA	378.64	407.416	419.259	399.66	428.599	344.495	449.85	580.357	0.752236	0.0313083	-0.0538043	0.0518697	0.0932115	0.0241399	0.148985	-0.166161	0.218801	0.586296
Bahd1	bromo adjacent homology domain containing 1 [Source:MGI Symbol;Acc:MGI:2139371]	NA	NA	0	NA	NA	NA	0	NA	NA	0	0	0	NA	1195.43	1112.98	1325.11	1313.84	1126.69	1173.11	1308.76	1585.55	0.873725	0.00456904	0.0506277	-0.0524692	0.199211	0.186882	-0.0294194	0.0288315	0.18669	0.463474
Baiap2	brain-specific angiogenesis inhibitor 1-associated protein 2 [Source:MGI Symbol;Acc:MGI:2137336]	NA	NA	0	NA	NA	NA	0	NA	NA	0	0	0	NA	1350.83	1154.14	1354.53	1398.16	1520.05	1271.83	1964.49	2138.77	0.896864	0.00253488	0.109054	-0.117976	0.112997	0.15874	0.122884	-0.134334	0.492918	0.615543
Bcap31	B cell receptor associated protein 31 [Source:MGI Symbol;Acc:MGI:1350933]	NA	NA	0	NA	NA	NA	0	NA	NA	0	0	0	NA	3347.86	3287.71	3615.67	3684.66	3067.92	3460.36	3496.23	3771.29	0.763045	0.0276302	0.0130196	-0.0131382	0.12404	0.151308	-0.0894405	0.0842178	0.0990992	0.208356
Bcas3	breast carcinoma amplified sequence 3 [Source:MGI Symbol;Acc:MGI:2385848]	NA	NA	0	NA	NA	NA	0	NA	NA	0	0	0	NA	772.782	773.061	883.7	842.818	798.145	751.952	932.131	896.393	0.944824	0.000402756	-0.000260627	0.000260579	0.193235	0.1249	0.042364	-0.0436457	0.266246	0.209845
Bckdha	branched chain ketoacid dehydrogenase E1/ alpha polypeptide [Source:MGI Symbol;Acc:MGI:107701]	NA	NA	0	NA	NA	NA	0	NA	NA	0	0	0	NA	630.42	657.882	806.099	915.042	650.118	639.689	736.532	839.076	0.719159	0.0443673	-0.0310847	0.030429	0.323558	0.506439	0.0116182	-0.0117125	0.191665	0.379717
Bcl2l11	BCL2-like 11 (apoptosis facilitator) [Source:MGI Symbol;Acc:MGI:1197519]	UCS	rescued	1	NA	NA	NA	0	NA	NA	0	1	0	NA	945.689	794.59	1241.23	1481.73	1176.9	765.959	1424.25	1437.24	0.745771	0.0336443	0.120119	-0.131036	0.512455	0.767966	0.276813	-0.342845	0.552015	0.565118
Bdkrb2	bradykinin receptor/ beta 2 [Source:MGI Symbol;Acc:MGI:102845]	NA	NA	0	NA	NA	NA	0	NA	NA	0	0	0	NA	9.11731	9.70144	9.57136	9.41325	9.38294	9.53888	9.91654	10.1915	0.761261	0.0282178	-0.0454905	0.0440998	0.0246252	0.000594462	-0.0119393	0.0118413	0.0678577	0.107314
Bet1l	Bet1 golgi vesicular membrane trafficking protein like [Source:MGI Symbol;Acc:MGI:1913128]	NA	NA	0	NA	NA	NA	0	NA	NA	0	0	0	NA	967.456	970.643	1078.15	1156.9	930.716	915.964	1076.78	1049.91	0.871365	0.00482109	-0.00237469	0.00237078	0.153921	0.255622	0.0114786	-0.0115706	0.221795	0.18533
Bfar	bifunctional apoptosis regulator [Source:MGI Symbol;Acc:MGI:1914368]	NA	NA	0	NA	NA	NA	0	NA	NA	0	0	0	NA	1479.8	1167.66	1433.71	1458.03	1218.54	1232.87	1453.72	1447.34	0.76927	0.0256393	0.160791	-0.180986	0.115146	0.139415	-0.00846079	0.00841146	0.246135	0.239798
Bhlhe41	basic helix-loop-helix family/ member e41 [Source:MGI Symbol;Acc:MGI:1930704]	NA	NA	0	NA	NA	NA	0	NA	NA	0	0	0	NA	345.066	409.015	571.059	459.809	481.862	379.442	577.497	550.382	0.731711	0.039085	-0.127849	0.117436	0.598919	0.286317	0.162098	-0.182644	0.42329	0.353911
Blcap	bladder cancer associated protein [Source:MGI Symbol;Acc:MGI:1858907]	NA	NA	0	NA	NA	NA	0	NA	NA	0	0	0	NA	1715.64	1571.31	2004.14	1856.78	1583.63	1750.51	1840.05	2095.08	0.775184	0.0238323	0.0619949	-0.064779	0.286237	0.176051	-0.0740791	0.0704604	0.142428	0.329687
Blzf1	basic leucine zipper nuclear factor 1 [Source:MGI Symbol;Acc:MGI:1201607]	NA	NA	0	NA	NA	NA	0	NA	NA	0	0	0	NA	839.429	831.055	851.332	880.929	812.078	807.516	870.826	1012.76	0.812374	0.0142762	0.00721395	-0.0072502	0.0275282	0.0768308	0.00405803	-0.00406947	0.104825	0.322668
Bmp6	bone morphogenetic protein 6 [Source:MGI Symbol;Acc:MGI:88182]	NA	NA	0	NA	NA	NA	0	NA	NA	0	0	0	NA	43.3191	44.5279	60.5115	52.4632	40.6933	39.9828	51.1041	59.1592	0.900358	0.00229213	-0.0199902	0.019717	0.462216	0.256314	0.01265	-0.0127619	0.341298	0.552461
Bmpr2	bone morphogenetic protein receptor/ type II (serine/threonine kinase) [Source:MGI Symbol;Acc:MGI:1095407]	NA	NA	0	NA	NA	NA	0	ST	LoF	1	1	0	NA	13218.6	12519.9	13687.7	12893.6	12362.4	12838.2	13149.5	14034.2	0.744209	0.0342243	0.0386411	-0.0397046	0.0889501	0.00273016	-0.0274939	0.0269798	0.0615477	0.155486
Bnip3l	BCL2/adenovirus E1B interacting protein 3-like [Source:MGI Symbol;Acc:MGI:1332659]	NA	NA	0	NA	NA	NA	0	NA	NA	0	0	0	NA	2830.73	3142.25	3640.13	3862	3311.01	3165.21	3567.12	4133.01	0.723402	0.042536	-0.0772774	0.0733477	0.285539	0.370899	0.0321179	-0.0328493	0.139607	0.352039
Bphl	biphenyl hydrolase-like (serine hydrolase/ breast epithelial mucin-associated antigen) [Source:MGI Symbol;Acc:MGI:1915271]	NA	NA	0	NA	NA	NA	0	NA	NA	0	0	0	NA	346.009	325.576	375.39	436.595	318.616	319.718	384.292	388.539	0.836663	0.00960318	0.0432396	-0.0445757	0.16082	0.378726	-0.00249278	0.00248848	0.267893	0.283749
Bpifb9b	BPI fold containing family B/ member 9B [Source:MGI Symbol;Acc:MGI:1918675]	NA	NA	0	NA	NA	NA	0	NA	NA	0	0	0	NA	3.68096	3.64118	3.71107	3.67011	3.63276	3.64315	4.05605	3.7626	0.773366	0.024379	0.00781667	-0.00785926	0.0195695	0.0035597	-0.00205973	0.0020568	0.156949	0.048602
Bre	NA	NA	NA	0	NA	NA	NA	0	NA	NA	0	0	0	NA	680.187	748.192	826.695	873.788	714.576	758.155	843.227	835.601	0.746323	0.033441	-0.0703756	0.0671017	0.211048	0.290976	-0.0433342	0.0420705	0.195499	0.182392
Brf2	BRF2/ RNA polymerase III transcription initiation factor 50kDa subunit [Source:MGI Symbol;Acc:MGI:1913903]	NA	NA	0	NA	NA	NA	0	NA	NA	0	0	0	NA	316.439	307.101	307.278	324.294	277.43	299.061	323.818	333.642	0.829997	0.0107702	0.0214454	-0.021769	-0.0209368	0.0568201	-0.0551718	0.0531394	0.167883	0.211001
Brwd3	bromodomain and WD repeat domain containing 3 [Source:MGI Symbol;Acc:MGI:3029414]	NA	NA	0	NA	NA	NA	0	NA	NA	0	0	1		975.748	920.259	1056.88	1070.04	979.055	894.695	1057	1051.28	0.827983	0.0111396	0.0416157	-0.0428519	0.156841	0.174703	0.0635336	-0.0664609	0.174046	0.166214
Bsdc1	BSD domain containing 1 [Source:MGI Symbol;Acc:MGI:1913466]	NA	NA	0	NA	NA	NA	0	NA	NA	0	0	0	NA	1160.71	1108.47	1344.93	1322.36	1045.24	1178.66	1285.74	1456.07	0.870353	0.00493186	0.0328367	-0.0336016	0.245367	0.220943	-0.0892607	0.0840584	0.209505	0.388981
Bsg	basigin [Source:MGI Symbol;Acc:MGI:88208]	NA	NA	0	NA	NA	NA	0	NA	NA	0	0	0	NA	14483.1	14193.9	15803.2	16245.7	12901.6	13859.1	14484.9	16821.9	0.829963	0.0107764	0.0144783	-0.0146251	0.140323	0.18016	-0.0525656	0.0507175	0.114437	0.330228
Bst2	bone marrow stromal cell antigen 2 [Source:MGI Symbol;Acc:MGI:1916800]	NA	NA	0	NA	NA	NA	0	NA	NA	0	0	0	NA	223.051	259.488	962.077	2787.71	273.072	201.738	1065.98	925.513	0.761321	0.0281981	-0.113272	0.105022	1.99551	3.53037	0.201931	-0.234867	2.16675	1.9629
Btbd10	BTB (POZ) domain containing 10 [Source:MGI Symbol;Acc:MGI:1916065]	NA	NA	0	NA	NA	NA	0	NA	NA	0	0	0	NA	1111.56	1051.78	1145.12	1049.82	1112.92	1097.11	1237.14	1245.05	0.812533	0.0142418	0.0393281	-0.0404303	0.0822367	-0.0431199	0.0102858	-0.0103597	0.162945	0.172143
Btd	biotinidase [Source:MGI Symbol;Acc:MGI:1347001]	NA	NA	0	NA	NA	NA	0	NA	NA	0	0	0	NA	461.486	439.365	445.128	501.797	466.495	485.702	525.067	549.175	0.805779	0.0157515	0.0349988	-0.0358689	-0.0170678	0.155818	-0.0293994	0.0288123	0.141242	0.206005
Btn1a1	butyrophilin/ subfamily 1/ member A1 [Source:MGI Symbol;Acc:MGI:103118]	NA	NA	0	NA	NA	NA	0	NA	NA	0	0	0	NA	3.14734	3.11648	3.10948	3.08898	3.17286	3.1448	3.29087	3.29098	0.730059	0.0397568	0.00708932	-0.00712433	-0.0103695	-0.0199113	0.00639391	-0.00642237	0.0590778	0.059123
C030013C21Rik	RIKEN cDNA C030013C21 gene [Source:MGI Symbol;Acc:MGI:1924667]	NA	NA	0	NA	NA	NA	0	NA	NA	0	0	0	NA	8.63276	8.40224	8.87092	8.4394	9.19385	8.89595	9.44256	9.44313	0.725139	0.0418	0.0193915	-0.0196557	0.0586526	-0.0132902	0.0235648	-0.0239561	0.0620729	0.0621609
C130021I20Rik	Riken cDNA C130021I20 gene [Source:MGI Symbol;Acc:MGI:3639863]	NA	NA	0	NA	NA	NA	0	NA	NA	0	0	0	NA	171.834	179.597	191.509	204.989	176.77	170.812	209.209	195.619	0.892773	0.00283959	-0.0322279	0.0315236	0.124169	0.222306	0.024521	-0.024945	0.267593	0.170695
C1galt1	core 1 synthase/ glycoprotein-N-acetylgalactosamine 3-beta-galactosyltransferase/ 1 [Source:MGI Symbol;Acc:MGI:2151071]	NA	NA	0	NA	NA	NA	0	NA	NA	0	0	0	NA	1031.15	1108.03	1100.71	1064.87	1022.03	1115.6	1264.76	1559.53	0.792946	0.0188883	-0.0528047	0.05094	0.0413747	-0.00637786	-0.0645756	0.0618086	0.242859	0.545104
C1qtnf1	C1q and tumor necrosis factor related protein 1 [Source:MGI Symbol;Acc:MGI:1919254]	NA	NA	0	NA	NA	NA	0	NA	NA	0	0	0	NA	841.232	561.055	1028.15	1170.44	650.558	542.275	1292.4	1041.05	0.903157	0.00210892	0.262794	-0.321567	0.552272	0.739264	0.125357	-0.137295	1.11566	0.803649
C2	complement component 2 (within H-2S) [Source:MGI Symbol;Acc:MGI:88226]	NA	NA	0	NA	NA	NA	0	NA	NA	0	0	0	NA	74.8055	56.6729	89.6439	141.363	69.0627	55.387	138.785	103.148	0.841689	0.00877871	0.18639	-0.214094	0.447452	1.10458	0.150415	-0.167942	1.15729	0.729151
C230091D08Rik	NA	NA	NA	0	NA	NA	NA	0	NA	NA	0	0	0	NA	1298.16	1328.4	1356.33	1437.63	1373.95	1290.13	1462.16	1402.77	0.767717	0.0261275	-0.0167098	0.0165185	0.0465336	0.130523	0.044693	-0.046122	0.134458	0.0746335
C77080	expressed sequence C77080 [Source:MGI Symbol;Acc:MGI:2140651]	NA	NA	0	NA	NA	NA	0	NA	NA	0	0	0	NA	995.388	852.575	1223.09	848.135	941.912	1023.77	1359.32	1523.97	0.803508	0.0162807	0.107395	-0.116037	0.404596	-0.12357	-0.0613684	0.0588641	0.467857	0.632802
Cacna1d	calcium channel/ voltage-dependent/ L type/ alpha 1D subunit [Source:MGI Symbol;Acc:MGI:88293]	NA	NA	0	adrenalaldosteroneproducingadenoma	oncogene	Mis	1	BRCA_GBM_HC_OV_ST	ambiguous	1	1	0	NA	16.9632	17.1553	16.7729	18.1441	16.0485	15.9262	17.1581	17.0423	0.795855	0.0181459	-0.00814884	0.00810307	-0.0244258	0.0889467	0.00550778	-0.00552889	0.101959	0.0921903
Cacna1g	calcium channel/ voltage-dependent/ T type/ alpha 1G subunit [Source:MGI Symbol;Acc:MGI:1201678]	NA	NA	0	NA	NA	NA	0	NA	NA	0	0	0	NA	1944.28	2115.5	2493.98	2739.7	2292.07	1731.85	3121.82	2585.13	0.842354	0.00867306	-0.0621658	0.0595974	0.297047	0.432616	0.18805	-0.216288	0.633789	0.361636
Cacna2d2	calcium channel/ voltage-dependent/ alpha 2/delta subunit 2 [Source:MGI Symbol;Acc:MGI:1929813]	NA	NA	0	NA	NA	NA	0	NA	NA	0	0	0	NA	2.30852	2.31369	2.35125	2.39695	2.33497	2.30449	2.37951	2.39809	0.851305	0.00732983	-0.00161495	0.00161314	0.0248452	0.0526129	0.00944664	-0.0095089	0.0367094	0.047929
Cacnb3	calcium channel/ voltage-dependent/ beta 3 subunit [Source:MGI Symbol;Acc:MGI:103307]	NA	NA	0	NA	NA	NA	0	NA	NA	0	0	0	NA	1908.28	1880.21	2062.55	2123.85	2387.79	1961.45	2724.96	2343.12	0.716248	0.0456505	0.0106502	-0.0107294	0.122807	0.165065	0.134915	-0.148845	0.325469	0.107669
Cacng7	calcium channel/ voltage-dependent/ gamma subunit 7 [Source:MGI Symbol;Acc:MGI:1932374]	NA	NA	0	NA	NA	NA	0	NA	NA	0	0	0	NA	653.351	604.522	703.997	718.464	656.461	582.577	719.282	783.276	0.884096	0.00356206	0.0549437	-0.0571193	0.162654	0.192001	0.083561	-0.0887001	0.215409	0.338371
Cadm4	cell adhesion molecule 4 [Source:MGI Symbol;Acc:MGI:2449088]	NA	NA	0	NA	NA	NA	0	NA	NA	0	0	0	NA	81.6031	68.147	76.8906	86.6686	58.1544	58.8127	87.4338	94.8092	0.906293	0.00191522	0.124139	-0.135835	0.0383225	0.211024	-0.00814214	0.00809645	0.580159	0.696995
Cadps	Ca2+-dependent secretion activator [Source:MGI Symbol;Acc:MGI:1350922]	NA	NA	0	NA	NA	NA	0	NA	NA	0	0	0	NA	10.0974	9.88965	11.4434	10.3391	9.65037	9.80204	11.6488	10.2693	0.766302	0.026577	0.0149174	-0.0150732	0.195446	0.0490423	-0.0112932	0.0112055	0.260235	0.0783895
Cadps2	Ca2+-dependent activator protein for secretion 2 [Source:MGI Symbol;Acc:MGI:2443963]	NA	NA	0	NA	NA	NA	0	NA	NA	0	0	0	NA	2.34413	2.34604	2.36565	2.39579	2.3016	2.30271	2.37824	2.34057	0.892823	0.00283569	-0.000587786	0.000587547	0.0126003	0.030864	-0.000348835	0.000348751	0.0469087	0.0238751
Camk4	calcium/calmodulin-dependent protein kinase IV [Source:MGI Symbol;Acc:MGI:88258]	NA	NA	0	NA	NA	NA	0	NA	NA	0	0	0	NA	231.222	193.586	329.721	321.192	249.621	235.744	366.154	356.334	0.860025	0.00615668	0.122466	-0.133834	0.634432	0.596622	0.0406686	-0.0418484	0.593381	0.554162
Camta1	calmodulin binding transcription activator 1 [Source:MGI Symbol;Acc:MGI:2140230]	NA	NA	0	epithelioidhaemangioendothelioma	TSG_fusion	T	1	HC	LoF	1	1	0	NA	186.006	205.642	210.224	187.232	201.437	199.33	235.525	225.588	0.757124	0.02961	-0.0742078	0.0705768	0.102369	-0.0647312	0.00756597	-0.00760586	0.23312	0.17093
Cant1	calcium activated nucleotidase 1 [Source:MGI Symbol;Acc:MGI:1923275]	NA	NA	0	prostate	fusion	T	1	NA	NA	0	1	0	NA	1709.34	1456.91	1636.96	1678.06	1462.58	1423.45	1610.81	1636.89	0.760726	0.0283956	0.110666	-0.119866	0.0482418	0.08402	0.0194312	-0.0196965	0.158698	0.181877
Car11	carbonic anhydrase 11 [Source:MGI Symbol;Acc:MGI:1336193]	NA	NA	0	NA	NA	NA	0	NA	NA	0	0	0	NA	75.1081	62.2905	82.1606	87.7399	73.5125	57.5474	93.262	77.567	0.766098	0.0266424	0.128673	-0.141283	0.258151	0.352937	0.165835	-0.187403	0.509134	0.243288
Ccdc103	coiled-coil domain containing 103 [Source:MGI Symbol;Acc:MGI:1920543]	NA	NA	0	NA	NA	NA	0	NA	NA	0	0	0	NA	13.4017	13.3945	13.7852	13.5673	12.8148	12.5795	12.9193	13.3045	0.813374	0.0140605	0.000385829	-0.000385932	0.0410877	0.0181022	0.0133049	-0.0134287	0.0250146	0.0674088
Ccdc130	coiled-coil domain containing 130 [Source:MGI Symbol;Acc:MGI:1914986]	NA	NA	0	NA	NA	NA	0	NA	NA	0	0	0	NA	253.828	232.501	240.829	237.149	235.412	240.663	275.741	268.375	0.753055	0.0310197	0.0619176	-0.0646947	-0.0139229	-0.0361396	-0.0159996	0.0158241	0.212125	0.173061
Ccdc132	NA	NA	NA	0	NA	NA	NA	0	NA	NA	0	0	0	NA	1532.26	1415.74	1475.95	1492.63	1465.8	1497.71	1617.02	1569.4	0.742789	0.0347568	0.0559209	-0.0581762	0.0019091	0.0181237	-0.0156197	0.0154524	0.126028	0.0829074
Ccdc146	coiled-coil domain containing 146 [Source:MGI Symbol;Acc:MGI:1922422]	NA	NA	0	NA	NA	NA	0	NA	NA	0	0	0	NA	2.5075	2.52111	2.54695	2.5228	2.47873	2.46298	2.56352	2.50338	0.82058	0.0125662	-0.00390887	0.00389831	0.0186136	0.0048674	0.00458993	-0.00460458	0.0531151	0.0188657
Ccdc154	coiled-coil domain containing 154 [Source:MGI Symbol;Acc:MGI:2685163]	NA	NA	0	NA	NA	NA	0	NA	NA	0	0	0	NA	2.73366	2.75186	2.8019	2.77191	2.76389	2.7762	2.92525	2.79479	0.741927	0.0350825	-0.00479372	0.00477785	0.0307793	0.0152536	-0.00320832	0.0032012	0.0786523	0.0128333
Ccdc155	NA	NA	NA	0	NA	NA	NA	0	NA	NA	0	0	0	NA	3.01023	3.01449	3.0225	3.05175	3.0633	3.03002	3.26789	3.17388	0.879177	0.00401961	-0.0010209	0.00102017	0.00484814	0.0187462	0.00785769	-0.00790072	0.10113	0.05902
Ccdc42b	NA	NA	NA	0	NA	NA	NA	0	NA	NA	0	0	0	NA	2.24699	2.26319	2.28867	2.24282	2.27284	2.24318	2.35203	2.36986	0.864378	0.0056192	-0.00519326	0.00517463	0.0213248	-0.00787445	0.00944557	-0.00950782	0.0588575	0.0697499
Ccdc92	coiled-coil domain containing 92 [Source:MGI Symbol;Acc:MGI:106485]	NA	NA	0	NA	NA	NA	0	NA	NA	0	0	0	NA	171.188	163.837	211.447	194.543	147.77	164.836	191.437	197.317	0.884893	0.0034912	0.0313109	-0.0320056	0.336029	0.21582	-0.0809943	0.0766879	0.292521	0.336172
Ccl8	chemokine (C-C motif) ligand 8 [Source:MGI Symbol;Acc:MGI:101878]	NA	NA	0	NA	NA	NA	0	NA	NA	0	0	0	NA	24.031	21.7691	29.059	35.7778	23.264	21.1546	31.3242	27.0033	0.745103	0.0338915	0.0695477	-0.0730709	0.343634	0.643716	0.0669342	-0.0701913	0.496114	0.281968
Ccndbp1	cyclin D-type binding-protein 1 [Source:MGI Symbol;Acc:MGI:109595]	NA	NA	0	NA	NA	NA	0	NA	NA	0	0	0	NA	628.801	706.845	734.631	809.694	662.236	647.088	798.519	772.761	0.869369	0.0050411	-0.0868619	0.0819278	0.137554	0.277911	0.0165957	-0.0167888	0.286577	0.239271
Ccno	cyclin O [Source:MGI Symbol;Acc:MGI:2145534]	NA	NA	0	NA	NA	NA	0	NA	NA	0	0	0	NA	15.747	15.2146	16.4813	15.5621	15.3336	15.5502	16.9056	20.4193	0.790292	0.0195818	0.0245937	-0.0250202	0.0903476	0.00755348	-0.0101514	0.0100805	0.130649	0.403083
Ccpg1	cell cycle progression 1 [Source:MGI Symbol;Acc:MGI:1196419]	NA	NA	0	NA	NA	NA	0	NA	NA	0	0	0	NA	1564.22	1441.28	2369.18	2684.89	1911	1406.28	2685.26	2279.41	0.756557	0.0298039	0.0578416	-0.0602578	0.656782	0.837258	0.204328	-0.238118	0.695059	0.45866
Ccs	copper chaperone for superoxide dismutase [Source:MGI Symbol;Acc:MGI:1333783]	NA	NA	0	NA	NA	NA	0	NA	NA	0	0	0	NA	747.616	788.514	872.301	915.758	762.602	744.717	894.829	854.65	0.862003	0.0059086	-0.0389308	0.0379078	0.183598	0.253739	0.0170176	-0.0172208	0.247699	0.18142
Cd276	CD276 antigen [Source:MGI Symbol;Acc:MGI:2183926]	NA	NA	0	NA	NA	NA	0	NA	NA	0	0	0	NA	2808.45	2732.51	2687.82	2978.43	2697.36	2581.42	2915.88	3034.03	0.80359	0.0162614	0.0196366	-0.0199076	-0.043699	0.104416	0.031342	-0.032038	0.143727	0.201032
Cd34	CD34 antigen [Source:MGI Symbol;Acc:MGI:88329]	NA	NA	0	NA	NA	NA	0	NA	NA	0	0	0	NA	336.878	274.586	466.913	980.316	314.876	227.773	642.51	500.285	0.768141	0.0259935	0.139959	-0.15501	0.610884	1.68098	0.214764	-0.252422	1.2437	0.882728
Cd38	CD38 antigen [Source:MGI Symbol;Acc:MGI:107474]	NA	NA	0	NA	NA	NA	0	NA	NA	0	0	0	NA	344.699	339.357	362.03	375.439	328.933	287.309	355.67	343.377	0.825097	0.011683	0.0112236	-0.0113116	0.081995	0.134463	0.0942985	-0.100896	0.207041	0.156296
Cd53	CD53 antigen [Source:MGI Symbol;Acc:MGI:88341]	NA	NA	0	NA	NA	NA	0	NA	NA	0	0	0	NA	106.98	104.048	140.567	150.359	96.7228	114.521	125.661	183.186	0.800917	0.0168981	0.0199047	-0.0201832	0.413821	0.510976	-0.126981	0.116703	0.250632	0.794401
Cd55	CD55 molecule/ decay accelerating factor for complement [Source:MGI Symbol;Acc:MGI:104850]	NA	NA	0	NA	NA	NA	0	NA	NA	0	0	0	NA	1339.76	828.908	1988.71	1949.57	915.74	1209.45	1917.3	1712.07	0.782603	0.0216803	0.305167	-0.387528	0.875023	0.846342	-0.214583	0.18676	0.851486	0.68815
Cd55b	CD55 molecule/ decay accelerating factor for complement B [Source:MGI Symbol;Acc:MGI:104849]	NA	NA	0	NA	NA	NA	0	NA	NA	0	0	0	NA	45.6385	39.9275	53.2423	55.1364	37.9434	43.2356	50.5659	46.5222	0.724304	0.042153	0.0932134	-0.0996546	0.315536	0.365967	-0.0972583	0.0911137	0.31706	0.196813
Cd80	CD80 antigen [Source:MGI Symbol;Acc:MGI:101775]	NA	NA	0	NA	NA	NA	0	NA	NA	0	0	0	NA	1045.02	845.696	1135.67	754.842	825.333	981.34	1419.23	1434.36	0.72982	0.0398548	0.144599	-0.160723	0.264615	-0.324686	-0.130287	0.119489	0.651776	0.667073
Cd81	CD81 antigen [Source:MGI Symbol;Acc:MGI:1096398]	NA	NA	0	NA	NA	NA	0	NA	NA	0	0	0	NA	20328	21186.4	24835.1	26445.9	21771.5	22083	24639.9	28341.1	0.802919	0.0164199	-0.0301448	0.0295278	0.258771	0.349431	-0.0102818	0.0102091	0.168271	0.370173
Cd82	CD82 antigen [Source:MGI Symbol;Acc:MGI:104651]	NA	NA	0	NA	NA	NA	0	NA	NA	0	0	0	NA	427.961	439.918	425.569	482.646	401.895	410.684	512.01	528.392	0.895613	0.00262569	-0.0200142	0.0197403	-0.0281006	0.153472	-0.0156897	0.0155209	0.333664	0.379101
Cdcp1	CUB domain containing protein 1 [Source:MGI Symbol;Acc:MGI:2442010]	NA	NA	0	NA	NA	NA	0	NA	NA	0	0	0	NA	2.23594	2.2953	2.26204	2.3037	2.23116	2.23218	2.26846	2.35786	0.726387	0.0412758	-0.0190247	0.0187771	-0.00228084	0.0240516	-0.000330464	0.000330389	0.0235849	0.0793532
Cdk19	cyclin-dependent kinase 19 [Source:MGI Symbol;Acc:MGI:1925584]	NA	NA	0	NA	NA	NA	0	NA	NA	0	0	0	NA	834.675	749.24	832.426	942.666	823.345	686.432	891.542	902.507	0.766996	0.0263558	0.0757918	-0.0799954	0.0718996	0.251324	0.125233	-0.137147	0.240039	0.257674
Cdk2ap2	CDK2-associated protein 2 [Source:MGI Symbol;Acc:MGI:1098779]	NA	NA	0	NA	NA	NA	0	NA	NA	0	0	0	NA	317.071	357.476	392.24	365.047	359.601	339.53	417.501	474.93	0.896138	0.00258729	-0.0891132	0.0839276	0.217819	0.114163	0.0408337	-0.0420232	0.256217	0.442152
Cdk5rap3	CDK5 regulatory subunit associated protein 3 [Source:MGI Symbol;Acc:MGI:1933126]	NA	NA	0	NA	NA	NA	0	NA	NA	0	0	0	NA	1068.16	1106.57	1142.63	1210.3	1017.89	1084.06	1198.47	1155.65	0.878205	0.00411419	-0.0257139	0.0252636	0.0715209	0.154533	-0.0461491	0.0447186	0.189461	0.136968
Cdkl2	cyclin-dependent kinase-like 2 (CDC2-related kinase) [Source:MGI Symbol;Acc:MGI:1858227]	NA	NA	0	NA	NA	NA	0	NA	NA	0	0	0	NA	287.898	284.008	350.565	339.03	306.72	345.839	380.07	371.699	0.754052	0.0306705	0.00977815	-0.00984487	0.293903	0.245633	-0.0891862	0.0839923	0.220156	0.188026
Cdkn1a	cyclin-dependent kinase inhibitor 1A (P21) [Source:MGI Symbol;Acc:MGI:104556]	LIHC_BLCA_PANCAN	oncogene_tsg	1	bladdercancer	oncogene_TSG	F_N	1	BLCA_HC_RCH	LoF	1	1	0	NA	17849.1	15733.7	25985.9	22735.2	15412.3	16278.2	21983.7	21794.7	0.829365	0.0108853	0.088128	-0.0938636	0.63001	0.437205	-0.0399695	0.0388919	0.472386	0.459929
Cdkn2b	cyclin dependent kinase inhibitor 2B [Source:MGI Symbol;Acc:MGI:104737]	NA	NA	0	NA	NA	NA	0	NA	NA	0	0	0	NA	3217.07	3054.21	4157.65	3053.52	2848.35	2840.39	3626.94	3343.15	0.725003	0.0418572	0.0369875	-0.0379608	0.407009	-0.038286	0.00201874	-0.00202157	0.350644	0.233099
Cebpb	CCAAT/enhancer binding protein (C/EBP)/ beta [Source:MGI Symbol;Acc:MGI:88373]	NA	NA	0	NA	NA	NA	0	NA	NA	0	0	0	NA	1929.69	1867.88	2686.62	2737.5	3262.54	2340.35	3913.76	3498.83	0.722604	0.0428768	0.0232947	-0.023677	0.500713	0.527782	0.219824	-0.259446	0.482383	0.320699
Celsr2	cadherin/ EGF LAG seven-pass G-type receptor 2 [Source:MGI Symbol;Acc:MGI:1858235]	NA	NA	0	NA	NA	NA	0	NA	NA	0	0	0	NA	76.7059	86.3748	103.38	92.9757	91.0216	82.8577	132.521	98.4925	0.794445	0.0185033	-0.0881759	0.0830957	0.342376	0.18934	0.0661943	-0.0693781	0.608133	0.18
Celsr3	cadherin/ EGF LAG seven-pass G-type receptor 3 [Source:MGI Symbol;Acc:MGI:1858236]	NA	NA	0	NA	NA	NA	0	NA	NA	0	0	0	NA	30.1092	29.7177	32.4246	28.3269	26.3594	26.0736	29.8679	30.4145	0.786939	0.0204807	0.00941074	-0.00947253	0.116294	-0.0786198	0.0078431	-0.00788597	0.188124	0.214288
Cemip	cell migration inducing protein/ hyaluronan binding [Source:MGI Symbol;Acc:MGI:2443629]	NA	NA	0	NA	NA	NA	0	NA	NA	0	0	0	NA	7675.38	8338.15	10942	13730.3	3953.01	4991.63	7415.59	7045.7	0.87863	0.00407265	-0.0609811	0.0585077	0.450584	0.778072	-0.178071	0.158487	0.729538	0.655719
Cep97	centrosomal protein 97 [Source:MGI Symbol;Acc:MGI:1921451]	NA	NA	0	NA	NA	NA	0	NA	NA	0	0	0	NA	424.831	398.806	500.617	485.254	431.651	361.52	500.595	462.371	0.811405	0.0144873	0.0448809	-0.0463221	0.2817	0.236732	0.122235	-0.133558	0.336012	0.22142
Cerk	ceramide kinase [Source:MGI Symbol;Acc:MGI:2386052]	NA	NA	0	NA	NA	NA	0	NA	NA	0	0	0	NA	634.137	667.421	738.281	805.492	577.11	679.471	719.689	777.419	0.78415	0.0212474	-0.037374	0.0364302	0.182002	0.307703	-0.122585	0.11298	0.195941	0.30726
Cfap70	cilia and flagella associated protein 70 [Source:MGI Symbol;Acc:MGI:1923920]	NA	NA	0	NA	NA	NA	0	NA	NA	0	0	0	NA	5.99854	5.88548	6.255	6.06561	5.97709	5.83612	6.34617	6.20923	0.901112	0.00224177	0.0136606	-0.0137912	0.0740596	0.0297018	0.0171148	-0.0173202	0.103558	0.0720845
Cgref1	cell growth regulator with EF hand domain 1 [Source:MGI Symbol;Acc:MGI:1915817]	NA	NA	0	NA	NA	NA	0	NA	NA	0	0	0	NA	524.028	512.47	693.215	529.584	429.017	444.081	579.122	755.259	0.86519	0.00552236	0.0159995	-0.0161789	0.419658	0.0312135	-0.0251083	0.0246788	0.407723	0.790829
Chic1	cysteine-rich hydrophobic domain 1 [Source:MGI Symbol;Acc:MGI:1344694]	NA	NA	0	NA	NA	NA	0	NA	NA	0	0	0	NA	458.683	407.395	468.573	459.275	433.369	408.241	508.746	563.515	0.897232	0.00250854	0.0830011	-0.0880694	0.113776	0.0848599	0.0424437	-0.0437303	0.273793	0.421303
Chid1	chitinase domain containing 1 [Source:MGI Symbol;Acc:MGI:1915288]	NA	NA	0	NA	NA	NA	0	NA	NA	0	0	0	NA	1313.43	1334.33	1548.45	1469.5	1294.1	1262.46	1420.42	1487.27	0.8636	0.00571295	-0.0114353	0.0113454	0.226052	0.15055	0.0177478	-0.0179688	0.152117	0.218467
Chmp1b	charged multivesicular body protein 1B [Source:MGI Symbol;Acc:MGI:1914314]	NA	NA	0	NA	NA	NA	0	NA	NA	0	0	0	NA	1727.82	1790.76	1934.79	2107.75	1755.47	1889.24	1928.95	2279.12	0.733565	0.0383388	-0.0260396	0.025578	0.137183	0.260714	-0.0539469	0.0520021	0.0820127	0.322671
Chmp7	charged multivesicular body protein 7 [Source:MGI Symbol;Acc:MGI:1913922]	NA	NA	0	NA	NA	NA	0	NA	NA	0	0	0	NA	1415.19	1387.03	1525.31	1456.41	1248.85	1430.05	1505.87	1573.33	0.835373	0.00982252	0.0144238	-0.0145694	0.122538	0.0558495	-0.101038	0.0944224	0.168957	0.232176
Chrm3	cholinergic receptor/ muscarinic 3/ cardiac [Source:MGI Symbol;Acc:MGI:88398]	NA	NA	0	NA	NA	NA	0	NA	NA	0	0	0	NA	46.6642	39.5567	69.8176	58.5019	38.2899	38.8015	65.6788	53.9069	0.872284	0.00472196	0.114279	-0.124116	0.695553	0.440446	-0.00960601	0.00954247	0.768858	0.483901
Chst3	carbohydrate sulfotransferase 3 [Source:MGI Symbol;Acc:MGI:1858224]	NA	NA	0	NA	NA	NA	0	NA	NA	0	0	0	NA	5.57378	5.60338	5.84907	5.55104	5.48239	5.47289	5.64104	5.81345	0.767847	0.0260865	-0.00382602	0.0038159	0.0657267	-0.00972325	0.00125037	-0.00125146	0.0424069	0.0858405
Clec16a	C-type lectin domain family 16/ member A [Source:MGI Symbol;Acc:MGI:1921624]	NA	NA	0	NA	NA	NA	0	NA	NA	0	0	0	NA	906.815	822.276	1009.8	1068.46	916.701	774.54	1077.15	964.836	0.77501	0.0238843	0.0688663	-0.0723191	0.224055	0.305521	0.116441	-0.126671	0.349135	0.190273
Clgn	calmegin [Source:MGI Symbol;Acc:MGI:107472]	NA	NA	0	NA	NA	NA	0	NA	NA	0	0	0	NA	13.5748	12.3074	13.6783	12.6057	12.8741	13.1147	15.4358	15.7181	0.835392	0.00981914	0.0689714	-0.072435	0.0799283	-0.0378809	-0.0134193	0.0132957	0.248388	0.274531
Clic5	chloride intracellular channel 5 [Source:MGI Symbol;Acc:MGI:1917912]	NA	NA	0	NA	NA	NA	0	NA	NA	0	0	0	NA	35.5462	31.8559	46.069	44.3924	35.0285	40.6658	47.8511	85.7916	0.821108	0.0124609	0.076901	-0.0812321	0.451004	0.397519	-0.111656	0.103632	0.338367	1.18065
Cln8	CLN8 transmembrane ER and ERGIC protein [Source:MGI Symbol;Acc:MGI:1349447]	NA	NA	0	NA	NA	NA	0	NA	NA	0	0	0	NA	983.027	924.057	1054.74	1006.26	916.771	812.193	976.306	931.301	0.736111	0.0373286	0.0439349	-0.045315	0.145515	0.0776283	0.0847249	-0.0900127	0.175498	0.107411
Clpb	ClpB caseinolytic peptidase B [Source:MGI Symbol;Acc:MGI:1100517]	NA	NA	0	NA	NA	NA	0	NA	NA	0	0	0	NA	865.75	917.03	1078.5	1144.21	959.234	893.851	1274.45	1149.34	0.912528	0.00156533	-0.0421058	0.0409117	0.274902	0.360225	0.0500258	-0.051823	0.459947	0.310882
Clvs1	clavesin 1 [Source:MGI Symbol;Acc:MGI:1921688]	NA	NA	0	NA	NA	NA	0	NA	NA	0	0	0	NA	11.3427	10.9344	11.3305	11.9093	10.8934	11.2442	11.9269	11.4349	0.739431	0.0360361	0.0261987	-0.0266833	0.0246525	0.0965274	-0.0230471	0.0226847	0.107715	0.0469426
Cma1	chymase 1/ mast cell [Source:MGI Symbol;Acc:MGI:96941]	NA	NA	0	NA	NA	NA	0	NA	NA	0	0	0	NA	5.35164	5.22891	5.61782	5.45562	5.15698	5.20914	5.7445	5.37534	0.832643	0.0102968	0.016638	-0.0168321	0.0866685	0.0444003	-0.00727848	0.00724195	0.148376	0.0525507
Cmip	c-Maf inducing protein [Source:MGI Symbol;Acc:MGI:1921690]	NA	NA	0	NA	NA	NA	0	NA	NA	0	0	0	NA	3652.96	3021.69	3949.84	3799.07	3263.05	3681.23	3907.36	4173.11	0.717903	0.0449184	0.130374	-0.143336	0.243101	0.186954	-0.0896029	0.0843617	0.170368	0.265298
Cmtm5	CKLF-like MARVEL transmembrane domain containing 5 [Source:MGI Symbol;Acc:MGI:2447164]	NA	NA	0	NA	NA	NA	0	NA	NA	0	0	0	NA	4.48595	4.48444	4.68267	4.72211	4.5281	4.58948	4.76079	4.86647	0.91038	0.0016807	0.000242148	-0.000242188	0.0621598	0.0742598	-0.00974417	0.0096788	0.0625491	0.0942244
Cnih2	cornichon family AMPA receptor auxiliary protein 2 [Source:MGI Symbol;Acc:MGI:1277225]	NA	NA	0	NA	NA	NA	0	NA	NA	0	0	0	NA	76.9187	76.4142	86.8517	90.6882	90.472	75.6461	116.544	99.4996	0.873582	0.0045841	0.00473956	-0.00475518	0.179958	0.242319	0.123334	-0.134871	0.488659	0.260553
Cntnap2	contactin associated protein-like 2 [Source:MGI Symbol;Acc:MGI:1914047]	NA	NA	0	glioma_melanoma	TSG	Mis	1	NA	NA	0	1	0	NA	2.1774	2.1585	2.21243	2.1913	2.15301	2.15824	2.19194	2.17438	0.734705	0.0378845	0.00627395	-0.00630136	0.029299	0.0154583	-0.0017523	0.00175017	0.0241045	0.0124978
Cog4	component of oligomeric golgi complex 4 [Source:MGI Symbol;Acc:MGI:2142808]	NA	NA	0	NA	NA	NA	0	NA	NA	0	0	0	NA	1869.18	1878.81	2062.11	2041.84	1959.09	1898.07	2107.12	2048.94	0.810292	0.0147321	-0.00371131	0.00370179	0.138	0.12375	0.0226431	-0.0230042	0.127738	0.0873403
Cog6	component of oligomeric golgi complex 6 [Source:MGI Symbol;Acc:MGI:1914792]	NA	NA	0	NA	NA	NA	0	NA	NA	0	0	0	NA	1278.89	1187.79	1303.27	1404.81	1239.18	1199.94	1356.16	1307.24	0.747715	0.0329309	0.052319	-0.054288	0.079562	0.187804	0.0230281	-0.0234017	0.153164	0.100163
Cog7	component of oligomeric golgi complex 7 [Source:MGI Symbol;Acc:MGI:2685013]	NA	NA	0	NA	NA	NA	0	NA	NA	0	0	0	NA	791.644	704.5	833.43	863.102	753.304	711.972	871.806	827.059	0.839777	0.00908673	0.0816741	-0.0865768	0.155884	0.206353	0.040132	-0.0412803	0.250907	0.17489
Col28a1	collagen/ type XXVIII/ alpha 1 [Source:MGI Symbol;Acc:MGI:2685312]	NA	NA	0	NA	NA	NA	0	NA	NA	0	0	0	NA	181.69	233.355	454.005	640.788	225.82	183.53	407.37	391.986	0.746749	0.0332843	-0.191789	0.169259	1.12944	1.62658	0.141839	-0.157319	0.993007	0.937472
Colq	collagen-like tail subunit (single strand of homotrimer) of asymmetric acetylcholinesterase [Source:MGI Symbol;Acc:MGI:1338761]	NA	NA	0	NA	NA	NA	0	NA	NA	0	0	0	NA	40.7212	33.0521	55.666	42.1066	38.1472	33.2201	64.8837	47.1927	0.831894	0.0104294	0.142682	-0.158357	0.593698	0.190949	0.0963139	-0.103207	0.862592	0.403302
Comp	cartilage oligomeric matrix protein [Source:MGI Symbol;Acc:MGI:88469]	NA	NA	0	NA	NA	NA	0	NA	NA	0	0	0	NA	49.4244	39.3415	42.4325	48.0273	45.4535	39.7376	52.1894	56.9521	0.737001	0.0369792	0.155218	-0.173954	-0.0648361	0.11385	0.0936889	-0.100198	0.293053	0.419045
Copg2	coatomer protein complex/ subunit gamma 2 [Source:MGI Symbol;Acc:MGI:1858683]	NA	NA	0	NA	NA	NA	0	NA	NA	0	0	0	NA	1356.43	1323.63	1637.79	1695.76	1337.43	1229.06	1615	1626.01	0.904247	0.00204019	0.017552	-0.0177681	0.289485	0.339665	0.059665	-0.0622394	0.33174	0.34154
Cops7b	COP9 signalosome subunit 7B [Source:MGI Symbol;Acc:MGI:1349388]	NA	NA	0	NA	NA	NA	0	NA	NA	0	0	0	NA	582.515	571.362	621.645	602.831	567.784	537.39	605.828	606.046	0.91415	0.00148172	0.0138784	-0.0140132	0.107674	0.0633366	0.0391404	-0.0402319	0.132707	0.133226
Coro1b	coronin/ actin binding protein 1B [Source:MGI Symbol;Acc:MGI:1345963]	NA	NA	0	NA	NA	NA	0	NA	NA	0	0	0	NA	4046.15	4426.33	4431.96	4797.94	4471.09	4110.64	4704.49	4957.34	0.785762	0.0208019	-0.0662352	0.0633273	0.065162	0.179632	0.0593591	-0.0619066	0.132769	0.208299
Cpa4	carboxypeptidase A4 [Source:MGI Symbol;Acc:MGI:1919041]	NA	NA	0	NA	NA	NA	0	NA	NA	0	0	0	NA	57.1069	51.9847	57.2043	65.0788	52.5255	45.6988	68.3014	55.4948	0.786486	0.0206039	0.0661972	-0.0693813	0.0686546	0.25472	0.0969382	-0.103924	0.475834	0.176273
Cpb2	carboxypeptidase B2 (plasma) [Source:MGI Symbol;Acc:MGI:1891837]	NA	NA	0	NA	NA	NA	0	NA	NA	0	0	0	NA	1.32155	1.32603	1.31988	1.3522	1.31987	1.33191	1.34183	1.36328	0.731306	0.0392488	-0.00244248	0.00243835	-0.00426172	0.0306346	-0.00656508	0.00653534	0.0172442	0.0401177
Cpd	carboxypeptidase D [Source:MGI Symbol;Acc:MGI:107265]	NA	NA	0	NA	NA	NA	0	NA	NA	0	0	0	NA	7243.01	6741.82	7822.38	7810.17	6345.06	6770.86	7584.34	7330.57	0.867766	0.00522242	0.0507986	-0.0526528	0.161816	0.159563	-0.0476133	0.046092	0.209775	0.160677
Cpeb3	cytoplasmic polyadenylation element binding protein 3 [Source:MGI Symbol;Acc:MGI:2443075]	NA	NA	0	lungcancer	TSG	D	1	SBCC	Act	1	1	0	NA	199.946	172.995	254.041	221.27	196.78	200.005	252.075	249.637	0.827103	0.0113035	0.100661	-0.108215	0.446116	0.246865	-0.0117717	0.0116764	0.345497	0.331476
Cpne4	copine IV [Source:MGI Symbol;Acc:MGI:1921270]	NA	NA	0	NA	NA	NA	0	NA	NA	0	0	0	NA	24.5439	25.5258	25.2019	24.2982	27.1745	23.5774	30.1041	30.895	0.763634	0.0274378	-0.0285737	0.0280187	0.00959276	-0.0430909	0.0987916	-0.106057	0.246499	0.283911
Cpne5	copine V [Source:MGI Symbol;Acc:MGI:2385908]	NA	NA	0	NA	NA	NA	0	NA	NA	0	0	0	NA	3.48939	3.47407	3.62606	3.50809	3.47674	3.60639	3.62626	3.88103	0.744765	0.0340171	0.00317103	-0.00317802	0.0585968	0.010881	-0.0266537	0.0261702	0.034095	0.132054
Cpne8	copine VIII [Source:MGI Symbol;Acc:MGI:1914121]	NA	NA	0	NA	NA	NA	0	NA	NA	0	0	0	NA	935.066	905.591	1087.97	1025.73	831.423	741.669	971.889	863.129	0.796372	0.0180159	0.0229187	-0.0232887	0.241422	0.156425	0.0800512	-0.0847553	0.305261	0.134045
Cpz	carboxypeptidase Z [Source:MGI Symbol;Acc:MGI:88487]	NA	NA	0	NA	NA	NA	0	NA	NA	0	0	0	NA	130.641	131.277	408.509	502.789	162.292	87.5077	460.093	317.551	0.831935	0.0104222	-0.00350643	0.00349793	1.64125	1.94083	0.377821	-0.513291	1.88115	1.34622
Crabp2	cellular retinoic acid binding protein II [Source:MGI Symbol;Acc:MGI:88491]	NA	NA	0	NA	NA	NA	0	NA	NA	0	0	0	NA	1015.75	875.776	1173.08	1189.93	961.255	638.187	1673.49	1570.11	0.920426	0.0011857	0.102994	-0.110915	0.310752	0.331327	0.265423	-0.325518	1.06529	0.973296
Creg1	cellular repressor of E1A-stimulated genes 1 [Source:MGI Symbol;Acc:MGI:1344382]	NA	NA	0	NA	NA	NA	0	NA	NA	0	0	0	NA	696.563	697.165	964.369	1121.15	654.949	626.994	780.013	878.506	0.708477	0.0491854	-0.000623719	0.000623449	0.468708	0.686027	0.0311215	-0.0318077	0.283238	0.454793
Crlf2	cytokine receptor-like factor 2 [Source:MGI Symbol;Acc:MGI:1889506]	NA	NA	0	B-ALL_DownsassociatedALL	oncogene_fusion	Mis_T	1	NA	NA	0	1	0	NA	446.836	485.209	532.489	579.736	486.27	460.704	545.324	592.075	0.841345	0.00883357	-0.0606547	0.0582072	0.192352	0.314997	0.0384325	-0.0394844	0.203789	0.322455
Crnkl1	crooked neck pre-mRNA splicing factor 1 [Source:MGI Symbol;Acc:MGI:1914127]	NA	NA	0	basecellcarcinoma		Mis	1	CM	Act	1	1	0	NA	1463.45	1429.79	1513.27	1795.5	1452.65	1410.76	1612.72	1645.59	0.745941	0.0335816	0.0166886	-0.0168839	0.0649861	0.311698	0.0209531	-0.0212619	0.171759	0.200868
Crtc1	CREB regulated transcription coactivator 1 [Source:MGI Symbol;Acc:MGI:2142523]	NA	NA	0	salivaryglandmucoepidermoid	oncogene_fusion	T	1	ACY	ambiguous	1	1	0	NA	729.011	609.526	714.036	768.566	673.378	605.673	861.814	798.13	0.873505	0.00459217	0.123356	-0.134898	0.0934115	0.199584	0.0744141	-0.0784621	0.430375	0.319623
Csnk2a1	casein kinase 2/ alpha 1 polypeptide [Source:MGI Symbol;Acc:MGI:88543]	NA	NA	0	NA	NA	NA	0	NA	NA	0	0	0	NA	5427.91	5305.1	5520.14	5340.27	5431.37	5504.31	5679.25	5879.99	0.817734	0.0131437	0.0164139	-0.0166028	0.04072	-0.00707087	-0.00965488	0.00959069	0.0547283	0.104843
Cst6	cystatin E/M [Source:MGI Symbol;Acc:MGI:1920970]	NA	NA	0	NA	NA	NA	0	NA	NA	0	0	0	NA	44.7862	42.7124	59.9661	42.6578	40.6365	43.4526	60.043	63.4593	0.863849	0.00568281	0.0337949	-0.0346056	0.454886	-0.0364508	-0.0491428	0.0475238	0.514075	0.593911
Ctr9	CTR9 homolog/ Paf1/RNA polymerase II complex component [Source:MGI Symbol;Acc:MGI:109345]	NA	NA	0	NA	NA	NA	0	NA	NA	0	0	0	NA	2653.39	2683.9	2711.62	2976.66	2693.74	2865.65	2937.74	3036.59	0.71205	0.0475405	-0.00827281	0.00822564	0.0230486	0.157586	-0.0453151	0.043935	0.0797789	0.127525
Ctsd	cathepsin D [Source:MGI Symbol;Acc:MGI:88562]	NA	NA	0	NA	NA	NA	0	NA	NA	0	0	0	NA	32396.8	29063.6	48944.3	44128.9	29082.4	28717.2	42774.9	47015.7	0.902558	0.00214729	0.0761947	-0.0804443	0.671485	0.522067	0.0090869	-0.0091445	0.565704	0.702081
Ctsf	cathepsin F [Source:MGI Symbol;Acc:MGI:1861434]	NA	NA	0	NA	NA	NA	0	NA	NA	0	0	0	NA	729.031	622.903	1283.95	1194.2	732.667	566.185	1064.11	1003.28	0.780577	0.0222555	0.109028	-0.117946	0.92556	0.821023	0.173992	-0.197891	0.712404	0.62749
Ctsl	cathepsin L [Source:MGI Symbol;Acc:MGI:88564]	NA	NA	0	NA	NA	NA	0	NA	NA	0	0	0	NA	13556.2	12939.8	18707	15326.3	14317.5	13376	17574.5	19346.6	0.865128	0.00552971	0.033178	-0.033959	0.49781	0.210243	0.0482317	-0.0499001	0.343941	0.482536
Cwc25	CWC25 spliceosome-associated protein [Source:MGI Symbol;Acc:MGI:1914730]	NA	NA	0	NA	NA	NA	0	NA	NA	0	0	0	NA	773.757	744.109	796.586	946.792	728.893	758.447	824.438	928.123	0.771903	0.0248247	0.0279074	-0.0284579	0.0698571	0.319075	-0.0289558	0.028386	0.148748	0.319654
Cxcl14	chemokine (C-X-C motif) ligand 14 [Source:MGI Symbol;Acc:MGI:1888514]	NA	NA	0	NA	NA	NA	0	NA	NA	0	0	0	NA	3613.25	3533.26	5873.83	7264.22	2661.13	3793.84	5242.32	6096.33	0.825787	0.0115515	0.0160582	-0.0162389	0.717064	1.02357	-0.278369	0.233247	0.699796	0.917532
Cxcl16	chemokine (C-X-C motif) ligand 16 [Source:MGI Symbol;Acc:MGI:1932682]	NA	NA	0	NA	NA	NA	0	NA	NA	0	0	0	NA	102.876	97.8381	97.5869	115.932	79.3001	82.5415	92.0067	98.6539	0.79632	0.0180289	0.0357639	-0.0366731	-0.0403814	0.208137	-0.0291881	0.0286092	0.185229	0.285865
Cyb561	cytochrome b-561 [Source:MGI Symbol;Acc:MGI:103253]	NA	NA	0	NA	NA	NA	0	NA	NA	0	0	0	NA	56.4667	63.5124	70.2199	86.4828	65.5251	50.9359	96.5783	87.8838	0.905638	0.00195469	-0.0873115	0.0823276	0.227169	0.527702	0.170273	-0.193093	0.729924	0.593822
Cyb561d1	cytochrome b-561 domain containing 1 [Source:MGI Symbol;Acc:MGI:1919273]	NA	NA	0	NA	NA	NA	0	NA	NA	0	0	0	NA	135.44	140.116	138.929	140.683	129.695	119.098	138.316	167.564	0.767534	0.0261852	-0.0246913	0.0242758	0.0119947	0.0300949	0.0601764	-0.0627961	0.153015	0.429761
Cyb5d1	cytochrome b5 domain containing 1 [Source:MGI Symbol;Acc:MGI:2685586]	NA	NA	0	NA	NA	NA	0	NA	NA	0	0	0	NA	341.306	335.965	355.196	415.305	325.079	365.974	390.842	393.9	0.717928	0.0449074	0.0113339	-0.0114236	0.0688847	0.294439	-0.0880048	0.0829437	0.177789	0.189035
Cyhr1	cysteine and histidine rich 1 [Source:MGI Symbol;Acc:MGI:1859320]	NA	NA	0	NA	NA	NA	0	NA	NA	0	0	0	NA	2260.04	2111.52	2345.42	2423.28	1980.1	2147.57	2345.75	2333.79	0.877317	0.00420196	0.0482005	-0.0498668	0.101694	0.14881	-0.0597554	0.0573785	0.184723	0.177348
Cyld	CYLD lysine 63 deubiquitinase [Source:MGI Symbol;Acc:MGI:1921506]	HNSC	tsg	1	cylindroma	TSG	Mis_N_F_S	1	HNSC_MM_NSPH_THYM	LoF	1	1	0	NA	1852.67	1809.83	2049.25	1799.42	1568.94	1893.93	2041.96	2066.65	0.756362	0.029871	0.0167747	-0.0169721	0.162265	-0.0252955	-0.142178	0.129415	0.237986	0.25533
Cyp4b1	cytochrome P450/ family 4/ subfamily b/ polypeptide 1 [Source:MGI Symbol;Acc:MGI:103225]	NA	NA	0	NA	NA	NA	0	NA	NA	0	0	0	NA	13.6399	13.1544	13.5064	15.3858	15.6655	14.9858	16.3695	17.3921	0.721835	0.0432068	0.0259028	-0.0263764	0.0117161	0.199671	0.0316429	-0.0323525	0.0950675	0.182489
Cyp4v3	cytochrome P450/ family 4/ subfamily v/ polypeptide 3 [Source:MGI Symbol;Acc:MGI:2142763]	NA	NA	0	NA	NA	NA	0	NA	NA	0	0	0	NA	359.701	327.396	348.444	419.618	368.332	318.505	419.432	396.798	0.747154	0.033136	0.066283	-0.0694756	0.0204112	0.288561	0.101039	-0.108652	0.288469	0.208437
Cys1	cystin 1 [Source:MGI Symbol;Acc:MGI:2177632]	NA	NA	0	NA	NA	NA	0	NA	NA	0	0	0	NA	70.6375	58.1935	84.03	74.519	69.0892	66.9699	82.9849	80.1225	0.742824	0.0347436	0.133026	-0.14655	0.383498	0.210201	0.0222985	-0.0226486	0.286687	0.236046
Cyth1	cytohesin 1 [Source:MGI Symbol;Acc:MGI:1334257]	NA	NA	0	NA	NA	NA	0	NA	NA	0	0	0	NA	452.814	431.458	478.45	466.882	460.61	412.85	485.478	495.51	0.844318	0.00836606	0.0344289	-0.0352706	0.113878	0.0785672	0.0768047	-0.0811246	0.152665	0.182174
D330023K18Rik	RIKEN cDNA D330023K18 gene [Source:MGI Symbol;Acc:MGI:2445152]	NA	NA	0	NA	NA	NA	0	NA	NA	0	0	0	NA	29.2739	30.1343	30.3869	30.2513	28.1194	28.9947	30.5083	31.4183	0.900989	0.00224991	-0.0210482	0.0207456	0.0327874	0.0263332	-0.0222814	0.0219425	0.0953509	0.137757
D330050G23Rik	RIKEN cDNA D330050G23 gene [Source:MGI Symbol;Acc:MGI:2445155]	NA	NA	0	NA	NA	NA	0	NA	NA	0	0	0	NA	12.1847	12.4878	12.7155	12.8509	13.3565	14.3506	14.2859	14.9947	0.716464	0.0455547	-0.0178329	0.0176152	0.0436865	0.058969	-0.0527124	0.0508541	0.0443361	0.114196
D630029K05Rik	RIKEN cDNA D630029K05 gene [Source:MGI Symbol;Acc:MGI:2143561]	NA	NA	0	NA	NA	NA	0	NA	NA	0	0	0	NA	2.49107	2.53251	2.57039	2.50619	2.53593	2.50834	2.58697	2.56709	0.733329	0.0384334	-0.0119486	0.0118504	0.0332728	-0.00322108	0.00786869	-0.00791184	0.036619	0.0254897
Daam1	dishevelled associated activator of morphogenesis 1 [Source:MGI Symbol;Acc:MGI:1914596]	NA	NA	0	NA	NA	NA	0	NA	NA	0	0	0	NA	2584.57	2748.03	3141.28	2778.83	2482.91	2782.56	2954.58	3249.06	0.804653	0.0160125	-0.0449146	0.0435584	0.236512	0.059638	-0.0845291	0.0798494	0.166389	0.30346
Daglb	diacylglycerol lipase/ beta [Source:MGI Symbol;Acc:MGI:2442032]	NA	NA	0	NA	NA	NA	0	NA	NA	0	0	0	NA	511.236	467.508	550.52	504.158	456.726	479.152	505.004	524.743	0.751683	0.0315039	0.0630574	-0.06594	0.169862	0.0429432	-0.0349913	0.0341627	0.109975	0.16529
Dcaf11	DDB1 and CUL4 associated factor 11 [Source:MGI Symbol;Acc:MGI:90168]	NA	NA	0	NA	NA	NA	0	NA	NA	0	0	0	NA	674.872	614.618	693.373	645.806	586.524	629.395	702.339	738.506	0.849448	0.00759673	0.0658854	-0.0690389	0.104902	0.00237166	-0.0517849	0.0499903	0.208192	0.280636
Dcaf5	DDB1 and CUL4 associated factor 5 [Source:MGI Symbol;Acc:MGI:2444785]	NA	NA	0	NA	NA	NA	0	NA	NA	0	0	0	NA	2066.94	2191.73	2318.76	2778.57	2104.7	2242.79	2404.07	2695.38	0.716738	0.0454328	-0.0429045	0.0416654	0.122951	0.383938	-0.0465689	0.0451126	0.145294	0.310305
Dcaf7	DDB1 and CUL4 associated factor 7 [Source:MGI Symbol;Acc:MGI:1919083]	NA	NA	0	NA	NA	NA	0	NA	NA	0	0	0	NA	5111.28	5289.08	5876.9	6170.29	4965.92	5122.4	5396.58	5808.26	0.7286	0.0403561	-0.024878	0.0244563	0.176493	0.246776	-0.0225535	0.0222063	0.0974311	0.20349
Dctn3	dynactin 3 [Source:MGI Symbol;Acc:MGI:1859251]	NA	NA	0	NA	NA	NA	0	NA	NA	0	0	0	NA	994.728	985.556	995.219	1058.15	1006.98	1066.38	1148.29	1116.31	0.847702	0.00785323	0.00666609	-0.00669703	0.00737875	0.0958347	-0.0419336	0.0407491	0.147508	0.106767
Dcxr	dicarbonyl L-xylulose reductase [Source:MGI Symbol;Acc:MGI:1915130]	NA	NA	0	NA	NA	NA	0	NA	NA	0	0	0	NA	988.604	675.07	1519.31	1374	807.29	770.591	1249.66	1131.4	0.740889	0.0354772	0.249092	-0.301264	0.869048	0.72401	0.0331709	-0.0339515	0.663543	0.520119
Ddhd1	DDHD domain containing 1 [Source:MGI Symbol;Acc:MGI:2150302]	NA	NA	0	NA	NA	NA	0	NA	NA	0	0	0	NA	792.309	643.442	878.53	719.554	730.712	630.795	909.911	903.187	0.817904	0.0131088	0.14233	-0.157924	0.291358	0.00336877	0.10217	-0.109961	0.418592	0.407892
Dennd1b	DENN/MADD domain containing 1B [Source:MGI Symbol;Acc:MGI:2447812]	NA	NA	0	NA	NA	NA	0	NA	NA	0	0	0	NA	1121.02	1085.08	1158	1095.49	1075.3	1069.47	1142.62	1228.7	0.821016	0.0124792	0.0233101	-0.023693	0.070143	-0.00992435	0.00391383	-0.00392448	0.0915212	0.196304
Dennd2a	DENN/MADD domain containing 2A [Source:MGI Symbol;Acc:MGI:2444961]	NA	NA	0	NA	NA	NA	0	NA	NA	0	0	0	NA	1370.8	1335.86	1396.07	1577.12	1270.21	1159.52	1449.64	1311.63	0.755476	0.0301758	0.0185076	-0.0187481	0.0448554	0.220781	0.0642699	-0.0672671	0.254901	0.110565
Dnaic2	NA	NA	NA	0	NA	NA	NA	0	NA	NA	0	0	0	NA	9.83734	9.8626	10.2287	9.99	9.53868	9.50357	10.2902	10.0737	0.953011	0.000250314	-0.00185132	0.00184894	0.0544309	0.0203643	0.00265771	-0.00266262	0.112072	0.0813878
Dnajb2	DnaJ heat shock protein family (Hsp40) member B2 [Source:MGI Symbol;Acc:MGI:1928739]	NA	NA	0	NA	NA	NA	0	NA	NA	0	0	0	NA	791.432	864.128	878.878	920.038	850.796	843.878	913.153	943.631	0.799765	0.0171772	-0.0647817	0.0619974	0.0864152	0.152445	0.00587765	-0.0059017	0.107921	0.155288
Dnajb9	DnaJ heat shock protein family (Hsp40) member B9 [Source:MGI Symbol;Acc:MGI:1351618]	NA	NA	0	NA	NA	NA	0	NA	NA	0	0	0	NA	1419.03	1138.87	1486.31	1316.19	1321.43	1261.14	1495.45	1891.12	0.772603	0.0246109	0.149944	-0.167356	0.216767	0.0414096	0.0332909	-0.0340773	0.21177	0.550429
Dnase2a	deoxyribonuclease II alpha [Source:MGI Symbol;Acc:MGI:1329019]	NA	NA	0	NA	NA	NA	0	NA	NA	0	0	0	NA	215.673	254.259	240.144	301.214	220.454	206.147	266.421	261.198	0.779362	0.0226047	-0.123607	0.113847	0.0314517	0.358338	0.0475904	-0.049214	0.320819	0.292255
Doc2b	double C2/ beta [Source:MGI Symbol;Acc:MGI:1100497]	NA	NA	0	NA	NA	NA	0	NA	NA	0	0	0	NA	48.6609	51.1779	60.4535	55.3654	61.3993	51.0858	61.5119	76.4746	0.742104	0.0350152	-0.0368372	0.03592	0.276226	0.149384	0.126561	-0.13874	0.129203	0.443317
Dock9	dedicator of cytokinesis 9 [Source:MGI Symbol;Acc:MGI:106321]	NA	NA	0	NA	NA	NA	0	NA	NA	0	0	0	NA	1500.73	1406.78	1429.6	1538.27	1287.24	1229.78	1782.87	1611.02	0.864469	0.00560829	0.0458836	-0.047391	-0.0241763	0.0815283	0.0325633	-0.0333153	0.502493	0.356265
Dpyd	dihydropyrimidine dehydrogenase [Source:MGI Symbol;Acc:MGI:2139667]	NA	NA	0	NA	NA	NA	0	NA	NA	0	0	0	NA	165.136	127.881	281.814	269.094	148.918	117.783	244.458	235.407	0.848169	0.00778416	0.172671	-0.196183	0.943765	0.877132	0.159292	-0.179088	0.874364	0.819934
Dsp	desmoplakin [Source:MGI Symbol;Acc:MGI:109611]	NA	NA	0	NA	NA	NA	0	NA	NA	0	0	0	NA	548.394	437.982	995	428.13	345.576	479.371	1240.41	1281.59	0.863634	0.00570883	0.153075	-0.171266	1.01256	-0.204091	-0.255297	0.21684	1.58844	1.63556
Dstyk	dual serine/threonine and tyrosine protein kinase [Source:MGI Symbol;Acc:MGI:1925064]	NA	NA	0	NA	NA	NA	0	NA	NA	0	0	0	NA	1736.63	1660.56	1845.63	1825.18	1727.53	1578.6	1826.68	1931.05	0.878537	0.00408179	0.0319458	-0.0326692	0.119771	0.103694	0.0635695	-0.0665002	0.144076	0.224244
Dusp15	dual specificity phosphatase-like 15 [Source:MGI Symbol;Acc:MGI:1934928]	NA	NA	0	NA	NA	NA	0	NA	NA	0	0	0	NA	105.345	84.5335	129.87	108.065	83.044	92.2618	163.252	134.323	0.91983	0.00121196	0.150042	-0.167478	0.452	0.186827	-0.0779263	0.073932	0.897222	0.615829
Dyx1c1	NA	NA	NA	0	NA	NA	NA	0	NA	NA	0	0	0	NA	30.5567	27.727	31.7133	33.8901	29.0672	27.7596	32.9115	31.0524	0.780449	0.0222922	0.0683968	-0.0718015	0.121995	0.217771	0.0328201	-0.0335841	0.212019	0.128134
Dzank1	double zinc ribbon and ankyrin repeat domains 1 [Source:MGI Symbol;Acc:MGI:2139080]	NA	NA	0	NA	NA	NA	0	NA	NA	0	0	0	NA	22.9632	21.6484	29.2146	27.5213	22.7573	21.8132	28.6824	24.8508	0.746592	0.0333418	0.0419066	-0.0431604	0.389269	0.303128	0.0302423	-0.0308899	0.364077	0.157204
E330013P04Rik	RIKEN cDNA E330013P04 gene [Source:MGI Symbol;Acc:MGI:2147732]	NA	NA	0	NA	NA	NA	0	NA	NA	0	0	0	NA	30.9162	29.4996	32.7041	30.5631	28.568	30.0397	35.097	30.637	0.738814	0.036274	0.0334373	-0.0342307	0.114546	0.0168628	-0.0366903	0.0357803	0.260257	0.064184
Ece1	endothelin converting enzyme 1 [Source:MGI Symbol;Acc:MGI:1101357]	NA	NA	0	NA	NA	NA	0	NA	NA	0	0	0	NA	7091.84	6433.69	7638.59	7255.11	6086.85	6994.57	7008.84	8203.62	0.727757	0.040705	0.0685463	-0.0719663	0.175692	0.101384	-0.103752	0.0967884	0.0997295	0.326815
Eda	ectodysplasin-A [Source:MGI Symbol;Acc:MGI:1195272]	NA	NA	0	NA	NA	NA	0	NA	NA	0	0	0	NA	205.141	225.277	240.761	259.072	207.03	204.488	223.235	244	0.747992	0.0328302	-0.0691228	0.0659619	0.161864	0.267614	0.00888335	-0.00893839	0.117607	0.245922
Eda2r	ectodysplasin A2 receptor [Source:MGI Symbol;Acc:MGI:2442860]	NA	NA	0	NA	NA	NA	0	NA	NA	0	0	0	NA	4792.04	4090.61	6122.12	6010.08	4498.2	4103.55	5789.94	5488.96	0.816063	0.0134905	0.109649	-0.118673	0.463041	0.436395	0.0647169	-0.0677569	0.428918	0.351904
Edar	ectodysplasin-A receptor [Source:MGI Symbol;Acc:MGI:1343498]	NA	NA	0	NA	NA	NA	0	NA	NA	0	0	0	NA	4.27338	4.24683	4.50366	4.49399	4.21706	4.22915	4.43085	4.3292	0.731324	0.0392416	0.00448938	-0.00450339	0.08021	0.0771088	-0.0020662	0.00206324	0.0692779	0.0357968
Edrf1	erythroid differentiation regulatory factor 1 [Source:MGI Symbol;Acc:MGI:1919831]	NA	NA	0	NA	NA	NA	0	NA	NA	0	0	0	NA	877.197	828.785	854.392	815.641	831.649	794.815	895.2	920.872	0.709942	0.0485067	0.0403705	-0.0415328	0.0023667	-0.0645971	0.0323078	-0.0330479	0.138543	0.179333
Efna3	ephrin A3 [Source:MGI Symbol;Acc:MGI:106644]	NA	NA	0	NA	NA	NA	0	NA	NA	0	0	0	NA	235.511	201.986	349.861	341.491	228.889	239.439	367.295	328.058	0.832997	0.0102345	0.106522	-0.115019	0.67751	0.642573	-0.0328733	0.0321409	0.64942	0.486434
Efs	embryonal Fyn-associated substrate [Source:MGI Symbol;Acc:MGI:105311]	NA	NA	0	NA	NA	NA	0	NA	NA	0	0	0	NA	641.683	455.686	745.924	795.977	530.149	481.626	937.792	801.866	0.913404	0.00151984	0.225884	-0.267937	0.443052	0.536751	0.0675811	-0.0709031	0.890452	0.664545
Ehd3	EH-domain containing 3 [Source:MGI Symbol;Acc:MGI:1928900]	NA	NA	0	NA	NA	NA	0	NA	NA	0	0	0	NA	317.913	361.856	394.476	447.198	301.397	342.998	406.957	410.613	0.84168	0.00878016	-0.0964109	0.0903696	0.214892	0.395869	-0.0962803	0.0902549	0.336934	0.349835
Ei24	etoposide induced 2.4 mRNA [Source:MGI Symbol;Acc:MGI:108090]	NA	NA	0	NA	NA	NA	0	NA	NA	0	0	0	NA	4270.32	4423.27	5583.51	5487.69	4001.71	4851.57	5146.74	5629.98	0.74953	0.0322736	-0.0256083	0.0251617	0.36122	0.336247	-0.145595	0.132239	0.217446	0.346919
Eif2ak1	eukaryotic translation initiation factor 2 alpha kinase 1 [Source:MGI Symbol;Acc:MGI:1353448]	NA	NA	0	NA	NA	NA	0	NA	NA	0	0	0	NA	1465.32	1405.62	1427.31	1536.47	1377.56	1443.83	1588.48	1600.9	0.871004	0.00486051	0.0296957	-0.0303198	-0.00822905	0.0980931	-0.0342931	0.0334969	0.171243	0.182474
Eif2ak3	eukaryotic translation initiation factor 2 alpha kinase 3 [Source:MGI Symbol;Acc:MGI:1341830]	NA	NA	0	NA	NA	NA	0	NA	NA	0	0	0	NA	1752.12	1429.54	1835.22	1803	1555.47	1518.81	1905.58	1747.33	0.786153	0.020695	0.139321	-0.154228	0.206177	0.180616	0.0171051	-0.0173104	0.309984	0.1849
Elmod2	ELMO/CED-12 domain containing 2 [Source:MGI Symbol;Acc:MGI:2445165]	NA	NA	0	NA	NA	NA	0	NA	NA	0	0	0	NA	909.244	706.479	1028.13	933.68	815.072	671.697	1001.01	885.725	0.747768	0.0329118	0.170559	-0.193461	0.347838	0.20882	0.132819	-0.146298	0.429277	0.252749
Eno4	enolase 4 [Source:MGI Symbol;Acc:MGI:2441717]	NA	NA	0	NA	NA	NA	0	NA	NA	0	0	0	NA	6.43669	6.60024	6.90837	6.50816	6.46916	6.29886	6.77196	7.22394	0.82621	0.0114714	-0.0182124	0.0179853	0.0838128	-0.00228267	0.0191148	-0.0193715	0.0851113	0.178323
Enpp4	ectonucleotide pyrophosphatase/phosphodiesterase 4 [Source:MGI Symbol;Acc:MGI:2682634]	NA	NA	0	NA	NA	NA	0	NA	NA	0	0	0	NA	281.119	238.092	356.149	348.714	276	248.702	359.136	389.262	0.899053	0.00238093	0.11486	-0.124801	0.45616	0.425723	0.0731715	-0.0770818	0.45303	0.569242
Ensa	endosulfine alpha [Source:MGI Symbol;Acc:MGI:1891189]	NA	NA	0	NA	NA	NA	0	NA	NA	0	0	0	NA	2720.54	2932.85	3095.34	3415.18	2659.71	2772.1	3060.28	3473.76	0.846839	0.00798203	-0.0552212	0.0531853	0.130984	0.272845	-0.0301656	0.0295478	0.172233	0.355067
Enthd2	NA	NA	NA	0	NA	NA	NA	0	NA	NA	0	0	0	NA	464.295	415.285	506.919	437.955	450.207	485.029	537.435	522.335	0.724526	0.0420589	0.0782265	-0.0827126	0.204941	-0.00603296	-0.0547429	0.0527414	0.200761	0.159645
Entpd4	ectonucleoside triphosphate diphosphohydrolase 4 [Source:MGI Symbol;Acc:MGI:1914714]	NA	NA	0	NA	NA	NA	0	NA	NA	0	0	0	NA	2587.13	2444.52	2643.69	2657.44	2354.44	2113.47	2851.66	2674.89	0.897992	0.00245478	0.0403218	-0.0414813	0.0715233	0.0790082	0.0757823	-0.0799848	0.3522	0.259881
Entpd5	ectonucleoside triphosphate diphosphohydrolase 5 [Source:MGI Symbol;Acc:MGI:1321385]	NA	NA	0	NA	NA	NA	0	NA	NA	0	0	0	NA	727.204	671.479	729.575	750.297	637.588	746.084	811.512	904.542	0.835631	0.00977843	0.0563639	-0.0586558	0.0610594	0.101465	-0.117806	0.108908	0.230182	0.386758
Epcam	epithelial cell adhesion molecule [Source:MGI Symbol;Acc:MGI:106653]	NA	NA	0	NA	NA	NA	0	NA	NA	0	0	0	NA	3.01555	3.00389	3.04992	3.00727	3.02768	3.03598	3.2115	3.35837	0.854557	0.006877	0.00279142	-0.00279683	0.0191388	-0.00117435	-0.00197642	0.00197371	0.0830596	0.147574
Epha4	Eph receptor A4 [Source:MGI Symbol;Acc:MGI:98277]	NA	NA	0	NA	NA	NA	0	NA	NA	0	0	0	NA	3090.46	2681.88	2968.86	3192.93	2476.82	2317.29	3108.64	2643.4	0.771915	0.0248211	0.0986664	-0.105913	0.0407553	0.145727	0.0472249	-0.0488232	0.375021	0.141131
Epor	erythropoietin receptor [Source:MGI Symbol;Acc:MGI:95408]	NA	NA	0	NA	NA	NA	0	NA	NA	0	0	0	NA	5.28353	4.98195	5.24881	5.06411	4.97199	4.98734	5.42734	5.26938	0.765481	0.0268402	0.0417734	-0.0430191	0.0322624	-0.0194194	-0.00222562	0.00222219	0.124195	0.0815842
Erlec1	endoplasmic reticulum lectin 1 [Source:MGI Symbol;Acc:MGI:1914003]	NA	NA	0	NA	NA	NA	0	NA	NA	0	0	0	NA	2133.88	2083.34	2231.63	2572.01	2284.62	2160.26	2427.44	2586.69	0.73442	0.0379978	0.017187	-0.0173942	0.081806	0.286604	0.0398092	-0.0409389	0.127287	0.218961
Ern1	endoplasmic reticulum (ER) to nucleus signalling 1 [Source:MGI Symbol;Acc:MGI:1930134]	NA	NA	0	NA	NA	NA	0	NA	NA	0	0	0	NA	574.415	570.038	602.969	554.583	577.668	574.694	696.246	735.17	0.861193	0.00600938	0.00550762	-0.00552872	0.0754974	-0.0451817	0.0037188	-0.00372842	0.273076	0.351555
Esco1	establishment of sister chromatid cohesion N-acetyltransferase 1 [Source:MGI Symbol;Acc:MGI:1925055]	NA	NA	0	NA	NA	NA	0	NA	NA	0	0	0	NA	908.214	930.484	936.833	919.792	910.771	977.356	981.966	1049.2	0.712839	0.0471818	-0.0175806	0.0173689	0.027179	0.00069411	-0.0517955	0.0500002	0.0567896	0.152335
Espn	espin [Source:MGI Symbol;Acc:MGI:1861630]	NA	NA	0	NA	NA	NA	0	NA	NA	0	0	0	NA	81.0421	59.0708	102.864	84.5653	53.7808	66.3633	87.6503	81.6141	0.790586	0.0195043	0.210153	-0.246072	0.554155	0.271548	-0.159603	0.143692	0.545064	0.442124
Espnl	espin-like [Source:MGI Symbol;Acc:MGI:2685402]	NA	NA	0	NA	NA	NA	0	NA	NA	0	0	0	NA	3.19421	3.16277	3.30657	3.13495	3.1336	3.16369	3.36436	3.28952	0.802793	0.0164498	0.00711656	-0.00715184	0.0569922	-0.0199	-0.00691093	0.00687799	0.0956015	0.0631461
Esrp2	epithelial splicing regulatory protein 2 [Source:MGI Symbol;Acc:MGI:1924661]	NA	NA	0	NA	NA	NA	0	NA	NA	0	0	0	NA	102.504	98.9881	117.342	91.2324	98.0488	90.405	140.379	119.821	0.787319	0.0203773	0.0249543	-0.0253936	0.219994	-0.143102	0.0573604	-0.0597357	0.575121	0.346671
Etfdh	electron transferring flavoprotein/ dehydrogenase [Source:MGI Symbol;Acc:MGI:106100]	NA	NA	0	NA	NA	NA	0	NA	NA	0	0	0	NA	1137.92	1148.01	1268.88	1367.22	1128.7	1098.73	1342.11	1186.83	0.75738	0.0295226	-0.00638321	0.00635509	0.150777	0.258473	0.0192805	-0.0195417	0.269126	0.0917344
Etnk2	ethanolamine kinase 2 [Source:MGI Symbol;Acc:MGI:2443760]	NA	NA	0	NA	NA	NA	0	NA	NA	0	0	0	NA	7.17679	7.17614	7.98918	7.4868	7.10685	7.01635	8.17139	7.60919	0.878172	0.00411745	6.53913e-05	-6.53942e-05	0.154773	0.0610743	0.00921523	-0.00927447	0.210586	0.107746
Etv3	ets variant 3 [Source:MGI Symbol;Acc:MGI:1350926]	NA	NA	0	NA	NA	NA	0	NA	NA	0	0	0	NA	947.482	965.97	1006.82	1038.3	908.128	977.376	1020.44	1296.92	0.777419	0.0231707	-0.0140073	0.0138726	0.0736289	0.11805	-0.0539825	0.0520352	0.114241	0.460134
Exd2	exonuclease 3'-5' domain containing 2 [Source:MGI Symbol;Acc:MGI:1922485]	NA	NA	0	NA	NA	NA	0	NA	NA	0	0	0	NA	439.648	440.454	439.901	453.66	413.384	414.726	451.015	497.07	0.83689	0.00956487	-0.00132137	0.00132016	-0.000493096	0.0439391	-0.00234018	0.00233639	0.123353	0.263625
Exoc3l4	exocyst complex component 3-like 4 [Source:MGI Symbol;Acc:MGI:1921363]	NA	NA	0	NA	NA	NA	0	NA	NA	0	0	0	NA	65.2804	71.7473	68.3957	71.0319	59.7883	63.9308	67.8245	76.2951	0.766821	0.0264117	-0.0697452	0.0665284	-0.00248852	0.0520727	-0.049133	0.0475147	0.132809	0.302594
Exoc7	exocyst complex component 7 [Source:MGI Symbol;Acc:MGI:1859270]	NA	NA	0	NA	NA	NA	0	NA	NA	0	0	0	NA	1514.84	1523.21	1938.73	1941.09	1502.13	1427.14	1761.29	1720.44	0.771391	0.0249819	-0.00398044	0.00396949	0.351967	0.353725	0.0364687	-0.0374145	0.266096	0.232238
Extl1	exostosin-like glycosyltransferase 1 [Source:MGI Symbol;Acc:MGI:1888742]	NA	NA	0	NA	NA	NA	0	NA	NA	0	0	0	NA	14.8429	15.1201	17.3753	16.7414	15.0603	15.8692	17.2131	16.6609	0.736543	0.037159	-0.0134067	0.0132833	0.213858	0.160235	-0.0382358	0.0372485	0.154521	0.107478
Extl3	exostosin-like glycosyltransferase 3 [Source:MGI Symbol;Acc:MGI:1860765]	NA	NA	0	NA	NA	NA	0	NA	NA	0	0	0	NA	4909.08	4808.49	5652.31	5189.12	4338.32	4745.61	5033.84	5778.76	0.837897	0.00939638	0.0148573	-0.0150119	0.218245	0.0948952	-0.0661803	0.0632771	0.148344	0.347445
F11r	F11 receptor [Source:MGI Symbol;Acc:MGI:1321398]	NA	NA	0	NA	NA	NA	0	NA	NA	0	0	0	NA	310.698	338.437	609.674	446.962	306.977	314.069	542.403	483.915	0.867946	0.00520185	-0.0630067	0.0603698	0.909519	0.461633	-0.0165714	0.0163832	0.804665	0.640055
Fabp3	fatty acid binding protein 3/ muscle and heart [Source:MGI Symbol;Acc:MGI:95476]	NA	NA	0	NA	NA	NA	0	NA	NA	0	0	0	NA	304.802	288.006	388.242	373.685	381.579	393.42	457.793	553.103	0.851894	0.00724638	0.0403084	-0.0414671	0.38939	0.334258	-0.0222118	0.021875	0.240503	0.513354
Faf2	Fas associated factor family member 2 [Source:MGI Symbol;Acc:MGI:1923827]	NA	NA	0	NA	NA	NA	0	NA	NA	0	0	0	NA	4271.24	4172.3	4609.18	4815.95	4033.6	4291.49	4635.55	4606.04	0.833555	0.0101368	0.0168074	-0.0170055	0.126664	0.189973	-0.0453977	0.0440126	0.155275	0.146061
Fah	fumarylacetoacetate hydrolase [Source:MGI Symbol;Acc:MGI:95482]	NA	NA	0	NA	NA	NA	0	NA	NA	0	0	0	NA	811.732	750.926	850.358	871.954	749.639	771.065	987.155	878.403	0.91755	0.001316	0.055074	-0.0572602	0.12214	0.158322	-0.0204712	0.0201848	0.376609	0.208215
Fam114a2	family with sequence similarity 114/ member A2 [Source:MGI Symbol;Acc:MGI:1917629]	NA	NA	0	NA	NA	NA	0	NA	NA	0	0	0	NA	1368.89	1360.49	1402.81	1393.71	1399.69	1422.15	1425.08	1454.46	0.718647	0.0445913	0.00443354	-0.00444721	0.0397427	0.0303547	-0.0115281	0.0114367	0.0144056	0.0438484
Fam117a	family with sequence similarity 117/ member A [Source:MGI Symbol;Acc:MGI:2144564]	NA	NA	0	NA	NA	NA	0	NA	NA	0	0	0	NA	183.27	182.227	191.446	248.623	187.822	197.51	254.433	322.017	0.87654	0.0042797	0.0041088	-0.00412053	0.0670823	0.444101	-0.036737	0.0358247	0.401185	0.741038
Fam118b	family with sequence similarity 118/ member B [Source:MGI Symbol;Acc:MGI:1924483]	NA	NA	0	NA	NA	NA	0	NA	NA	0	0	0	NA	538.189	476.616	528.134	532.504	473.682	500.563	555.047	530.002	0.779915	0.0224453	0.0849833	-0.0903044	0.0577728	0.0696618	-0.0403659	0.0392672	0.188327	0.121714
Fam120b	family with sequence similarity 120/ member B [Source:MGI Symbol;Acc:MGI:1914794]	NA	NA	0	NA	NA	NA	0	NA	NA	0	0	0	NA	1585.91	1450.07	1791.94	1632	1525.22	1473.39	1696.47	1620.99	0.716154	0.0456926	0.0631467	-0.0660376	0.239363	0.104479	0.0247232	-0.0251543	0.178246	0.112586
Fam124b	family with sequence similarity 124/ member B [Source:MGI Symbol;Acc:MGI:3026880]	NA	NA	0	NA	NA	NA	0	NA	NA	0	0	0	NA	8.21084	7.84042	8.63186	8.96882	7.91746	7.87281	10.3074	8.22825	0.74254	0.0348505	0.0329157	-0.0336842	0.105057	0.160303	0.00407386	-0.0040854	0.384648	0.0596208
Fam126a	family with sequence similarity 126/ member A [Source:MGI Symbol;Acc:MGI:2149839]	NA	NA	0	NA	NA	NA	0	NA	NA	0	0	0	NA	2405.48	2309.94	2463.95	2574.86	2101.74	2264.54	2375.28	2532.54	0.860893	0.00604695	0.0289393	-0.0295317	0.0635827	0.127105	-0.0548227	0.0528155	0.121695	0.214182
Fam134a	NA	NA	NA	0	NA	NA	NA	0	NA	NA	0	0	0	NA	960.717	977.118	1101.7	1163	1019.44	896.065	1213.43	1141.89	0.896206	0.0025824	-0.012262	0.0121587	0.185284	0.263405	0.090053	-0.0960505	0.341368	0.253695
Fam134b	NA	NA	NA	0	NA	NA	NA	0	NA	NA	0	0	0	NA	283.166	275.607	392.892	340.684	247.975	252.12	353.908	362.363	0.946068	0.000376487	0.0193854	-0.0196495	0.49187	0.286173	-0.012005	0.011906	0.501171	0.535235
Fam160b1	family with sequence similarity 160/ member B1 [Source:MGI Symbol;Acc:MGI:2147545]	NA	NA	0	NA	NA	NA	0	NA	NA	0	0	0	NA	2561.83	2490.99	2607.59	2676.21	2367.98	2443.57	2572.29	2675.89	0.915658	0.00140667	0.0200867	-0.0203703	0.0456272	0.0831019	-0.0228468	0.0224906	0.0965498	0.153515
Fam161b	family with sequence similarity 161/ member B [Source:MGI Symbol;Acc:MGI:2443027]	NA	NA	0	NA	NA	NA	0	NA	NA	0	0	0	NA	34.4305	35.3959	44.6368	39.5849	35.5239	36.4061	47.5367	41.9748	0.866467	0.00537238	-0.0200855	0.0198097	0.354462	0.181177	-0.0178032	0.0175862	0.402447	0.222929
Fam173a	NA	NA	NA	0	NA	NA	NA	0	NA	NA	0	0	0	NA	283.663	315.797	358.414	366.741	313.925	294.356	388.703	338.424	0.783913	0.0213134	-0.0794839	0.0753325	0.257962	0.291096	0.0456823	-0.0471762	0.353928	0.154093
Fam179b	NA	NA	NA	0	NA	NA	NA	0	NA	NA	0	0	0	NA	2011.18	1992.64	2175.85	2265.1	2270.36	2224.17	2357.89	2483.43	0.732047	0.0389489	0.00666347	-0.00669439	0.120203	0.178195	0.0147484	-0.0149008	0.0693245	0.144163
Fam180a	family with sequence similarity 180/ member A [Source:MGI Symbol;Acc:MGI:3039626]	NA	NA	0	NA	NA	NA	0	NA	NA	0	0	0	NA	36.411	37.8124	45.914	64.6593	41.511	33.2971	55.5791	47.7858	0.72088	0.043619	-0.0275007	0.0269863	0.307059	0.800983	0.1503	-0.167798	0.571347	0.353387
Fam19a2	NA	NA	NA	0	NA	NA	NA	0	NA	NA	0	0	0	NA	44.4191	45.0531	43.4323	46.6799	37.7252	35.0408	40.4473	45.2528	0.778776	0.0227746	-0.0102597	0.0101872	-0.0426715	0.0613641	0.0522647	-0.0542295	0.152777	0.314741
Fam19a3	NA	NA	NA	0	NA	NA	NA	0	NA	NA	0	0	0	NA	7.87138	7.5509	8.1724	8.06667	7.60669	7.73014	8.01397	8.5977	0.841756	0.00876802	0.0296727	-0.0302959	0.0838168	0.0650295	-0.0116599	0.0115664	0.0635884	0.165023
Fam19a5	NA	NA	NA	0	NA	NA	NA	0	NA	NA	0	0	0	NA	259.798	185.235	249.642	259.32	176.046	194.147	210.887	305.072	0.718057	0.0448504	0.223478	-0.264556	0.165949	0.220823	-0.0723237	0.0688705	0.188196	0.720873
Fam46a	NA	NA	NA	0	NA	NA	NA	0	NA	NA	0	0	0	NA	893.551	753.838	861.476	1078.08	740.691	662.408	830.308	1092.45	0.782018	0.0218454	0.117441	-0.127855	0.0647024	0.388284	0.0783273	-0.0828252	0.243101	0.638951
Fam46c	NA	NA	NA	0	NA	NA	NA	0	NA	NA	0	0	0	NA	22.2447	22.3756	24.2326	24.8117	23.0955	24.7086	24.8664	27.9065	0.745697	0.0336718	-0.00423873	0.00422631	0.119248	0.153322	-0.0495231	0.0478794	0.0570625	0.223468
Fbln7	fibulin 7 [Source:MGI Symbol;Acc:MGI:1917620]	NA	NA	0	NA	NA	NA	0	NA	NA	0	0	0	NA	43.3528	46.5657	46.3554	61.3101	53.6126	40.5682	67.81	56.897	0.734266	0.038059	-0.0524925	0.0506494	0.0441209	0.447508	0.18714	-0.215085	0.526064	0.27292
Fbxl20	F-box and leucine-rich repeat protein 20 [Source:MGI Symbol;Acc:MGI:1919444]	NA	NA	0	NA	NA	NA	0	NA	NA	0	0	0	NA	3106.32	2693.07	3904.44	3434.43	3128.18	2738.91	3829.97	3417.54	0.753247	0.0309521	0.0993048	-0.106649	0.429214	0.244168	0.0926788	-0.0990437	0.384691	0.220313
Fbxl21	F-box and leucine-rich repeat protein 21 [Source:MGI Symbol;Acc:MGI:2442921]	NA	NA	0	NA	NA	NA	0	NA	NA	0	0	0	NA	57.0155	53.1251	68.7887	70.8883	52.4846	47.7623	62.8179	60.478	0.826234	0.011467	0.0500795	-0.0518806	0.320896	0.364272	0.0664085	-0.0696134	0.325692	0.270926
Fbxo25	F-box protein 25 [Source:MGI Symbol;Acc:MGI:1914072]	NA	NA	0	NA	NA	NA	0	NA	NA	0	0	0	NA	1673.93	1496.22	1818.31	1781.3	1435.72	1516.64	1695.82	1625.44	0.774046	0.0241737	0.0786886	-0.0832294	0.198047	0.168375	-0.0400965	0.0390122	0.20011	0.138958
Fbxo38	F-box protein 38 [Source:MGI Symbol;Acc:MGI:2444639]	NA	NA	0	NA	NA	NA	0	NA	NA	0	0	0	NA	2547.54	2541.11	2874.27	3144.34	2652.41	2596.48	2968.1	3154.76	0.830083	0.0107546	0.00182168	-0.00182399	0.175913	0.305474	0.0152903	-0.0154541	0.177531	0.265521
Fbxw7	F-box and WD-40 domain protein 7 [Source:MGI Symbol;Acc:MGI:1354695]	BRCA_ESCA_STAD_LUSC_UCEC_BLCA_COADREAD_PANCAN_CESC_UCS_HNSC	oncogene_tsg	1	colorectal_endometrial_T-ALL	TSG	Mis_N_D_F	1	BLCA_BRCA_CESC_CH_CLL_COREAD_ESCA_HNSC_LUSC_MBL_NSPH_PAAD_PIA_ST_UCEC_UCS	LoF	1	1	0	NA	1312.6	1303.66	1572.46	1477.19	1433.56	1272.69	1525.89	1522.31	0.735704	0.0374889	0.00492418	-0.00494104	0.265517	0.175345	0.0833062	-0.0884129	0.173359	0.169973
Fchsd1	FCH and double SH3 domains 1 [Source:MGI Symbol;Acc:MGI:2441771]	NA	NA	0	NA	NA	NA	0	NA	NA	0	0	0	NA	282.07	269.656	306.916	361.39	289.979	262.293	432.437	432.588	0.962821	0.000124919	0.0321032	-0.0328339	0.15389	0.389602	0.0705694	-0.0741997	0.647108	0.647613
Fchsd2	FCH and double SH3 domains 2 [Source:MGI Symbol;Acc:MGI:2448475]	NA	NA	0	NA	NA	NA	0	NA	NA	0	0	0	NA	1687.53	1533.66	1644.93	1743.2	1799.21	1673.96	1920.23	2102.89	0.819395	0.0128047	0.0673191	-0.0706148	0.0304265	0.114139	0.0511105	-0.0529879	0.145022	0.276121
Fgf1	fibroblast growth factor 1 [Source:MGI Symbol;Acc:MGI:95515]	NA	NA	0	NA	NA	NA	0	NA	NA	0	0	0	NA	49.56	43.5448	55.8394	51.7318	55.3837	52.9936	64.7969	61.6671	0.810899	0.0145982	0.0903207	-0.0963551	0.262429	0.152196	0.03147	-0.0321718	0.257934	0.186511
Fgf18	fibroblast growth factor 18 [Source:MGI Symbol;Acc:MGI:1277980]	NA	NA	0	NA	NA	NA	0	NA	NA	0	0	0	NA	155.989	110.52	201.488	228.839	171.517	94.5973	212.732	238.13	0.773746	0.0242642	0.22726	-0.269877	0.596505	0.780148	0.366305	-0.492173	0.676993	0.839705
Fgfr1	fibroblast growth factor receptor 1 [Source:MGI Symbol;Acc:MGI:95522]	PANCAN	rescued	1	MPN_NHL_salivaryadenoma	oncogene_fusion	T	1	BLCA_MBL_OV_PCPG_PIA_PRAD	Act	1	1	0	NA	7425.12	8139.69	8878.31	10076.3	9179.65	8064.56	10455.9	12098.5	0.86182	0.00593124	-0.0678017	0.0647578	0.19007	0.37268	0.0903987	-0.0964439	0.278211	0.488718
Fgfrl1	fibroblast growth factor receptor-like 1 [Source:MGI Symbol;Acc:MGI:2150920]	NA	NA	0	NA	NA	NA	0	NA	NA	0	0	0	NA	1085.39	1168.26	1109.47	1284.52	942.459	1047.22	1145.81	1534.21	0.765648	0.0267865	-0.0540494	0.0520973	-0.0223918	0.188972	-0.0780332	0.0740282	0.203827	0.624961
Fhod3	formin homology 2 domain containing 3 [Source:MGI Symbol;Acc:MGI:1925847]	NA	NA	0	NA	NA	NA	0	NA	NA	0	0	0	NA	229.468	215.46	291.076	304.345	213.963	159.679	321.152	234	0.820139	0.0126546	0.0447213	-0.046152	0.38782	0.452134	0.195702	-0.226479	0.781598	0.324852
Ficd	FIC domain containing [Source:MGI Symbol;Acc:MGI:1098550]	NA	NA	0	NA	NA	NA	0	NA	NA	0	0	0	NA	462.011	489.161	582.359	571.691	434.667	494.325	558.32	559.771	0.835396	0.00981846	-0.041779	0.0406031	0.292202	0.26553	-0.0957557	0.0897938	0.265425	0.26917
Fkbp1b	FK506 binding protein 1b [Source:MGI Symbol;Acc:MGI:1336205]	NA	NA	0	NA	NA	NA	0	NA	NA	0	0	0	NA	96.977	95.8787	95.5987	110.645	89.4131	91.0474	103.715	106.025	0.853138	0.00707233	0.00819236	-0.00823915	-0.0124594	0.19842	-0.0131253	0.0130069	0.200949	0.232727
Fndc3b	fibronectin type III domain containing 3B [Source:MGI Symbol;Acc:MGI:1919257]	NA	NA	0	NA	NA	NA	0	NA	NA	0	0	0	NA	17179.3	16474.4	19479	17430	15749.9	16313	18070.9	17990	0.834019	0.010056	0.0299082	-0.0305413	0.211156	0.0508032	-0.0255593	0.0251143	0.17276	0.166291
Foxj2	forkhead box J2 [Source:MGI Symbol;Acc:MGI:1926805]	NA	NA	0	NA	NA	NA	0	NA	NA	0	0	0	NA	1549.94	1540.68	1624.61	1555	1487.92	1377.43	1562.47	1596.29	0.84721	0.00792652	0.00431465	-0.00432759	0.0722007	0.00902283	0.0545857	-0.0567325	0.125114	0.156015
Foxo1	forkhead box O1 [Source:MGI Symbol;Acc:MGI:1890077]	NA	NA	0	alveolarrhabdomyosarcoma	oncogene_TSG_fusion	T	1	BLY_NHLY	Act	1	1	0	NA	1109.37	934.737	1122.84	1070.4	912.91	1000.75	1134.89	1382.23	0.820039	0.0126747	0.118268	-0.128836	0.135679	0.0666794	-0.0677904	0.0647475	0.246217	0.53066
Frmd6	FERM domain containing 6 [Source:MGI Symbol;Acc:MGI:2442579]	NA	NA	0	NA	NA	NA	0	NA	NA	0	0	0	NA	6734.83	7022.27	7506.4	8627.3	7354.37	6646.73	8760.76	8989.06	0.905177	0.0019828	-0.0304632	0.0298332	0.126018	0.326805	0.0711338	-0.0748238	0.323587	0.360702
Fstl4	follistatin-like 4 [Source:MGI Symbol;Acc:MGI:2443199]	NA	NA	0	NA	NA	NA	0	NA	NA	0	0	0	NA	23.162	22.0186	23.8227	22.5391	22.8941	21.6591	24.0834	23.9385	0.785227	0.0209493	0.0360591	-0.0369835	0.0766359	-0.00327312	0.0394476	-0.0405566	0.112513	0.103808
Ftcd	formiminotransferase cyclodeaminase [Source:MGI Symbol;Acc:MGI:1339962]	NA	NA	0	NA	NA	NA	0	NA	NA	0	0	0	NA	6.14246	6.21911	6.76731	6.4575	6.39826	6.22237	6.65563	6.60789	0.720388	0.0438319	-0.00897449	0.00891901	0.130791	0.0631847	0.0199669	-0.0202471	0.0768626	0.0664776
Fuca1	fucosidase/ alpha-L- 1/ tissue [Source:MGI Symbol;Acc:MGI:95593]	NA	NA	0	NA	NA	NA	0	NA	NA	0	0	0	NA	1792.38	1599.31	2123.97	2248.32	1520.7	1565.49	2063.52	2230.8	0.936563	0.000608235	0.0798738	-0.0845565	0.324763	0.406841	-0.0210909	0.0207871	0.419284	0.531735
Fzd1	frizzled class receptor 1 [Source:MGI Symbol;Acc:MGI:1196625]	NA	NA	0	NA	NA	NA	0	NA	NA	0	0	0	NA	3183.47	2312.37	3502.54	4037.73	2830.95	2278.14	3739.45	3595.39	0.809603	0.0148849	0.21226	-0.248968	0.35006	0.555205	0.14822	-0.16521	0.549761	0.493081
Fzd6	frizzled class receptor 6 [Source:MGI Symbol;Acc:MGI:108474]	NA	NA	0	NA	NA	NA	0	NA	NA	0	0	0	NA	861.977	799.022	867.421	775.673	749.261	627.016	830.676	855.571	0.718933	0.0444662	0.0536704	-0.0557444	0.0627538	-0.0985298	0.12277	-0.134197	0.271588	0.314189
G730013B05Rik	RIKEN cDNA G730013B05 gene [Source:MGI Symbol;Acc:MGI:3588276]	NA	NA	0	NA	NA	NA	0	NA	NA	0	0	0	NA	1.34325	1.34114	1.34152	1.35271	1.35073	1.35377	1.36386	1.40719	0.726596	0.0411886	0.00113018	-0.00113107	-0.000722901	0.0112556	-0.00161898	0.00161717	0.0123365	0.0574534
Gabra3	gamma-aminobutyric acid (GABA) A receptor/ subunit alpha 3 [Source:MGI Symbol;Acc:MGI:95615]	NA	NA	0	NA	NA	NA	0	NA	NA	0	0	0	NA	57.2548	54.591	55.6821	58.8055	48.1558	44.1926	63.8372	53.4461	0.807598	0.0153356	0.0339574	-0.034776	-0.00622442	0.0725121	0.0606221	-0.0632816	0.467312	0.210999
Gal	galanin and GMAP prepropeptide [Source:MGI Symbol;Acc:MGI:95637]	NA	NA	0	NA	NA	NA	0	NA	NA	0	0	0	NA	5.0455	4.95583	5.13425	4.90727	5.06504	4.8687	5.45363	5.14809	0.709808	0.0485688	0.0128773	-0.0129933	0.0380343	-0.0271979	0.0282364	-0.0288001	0.13488	0.0517009
Gal3st3	galactose-3-O-sulfotransferase 3 [Source:MGI Symbol;Acc:MGI:3617843]	NA	NA	0	NA	NA	NA	0	NA	NA	0	0	0	NA	2.20626	2.2006	2.26239	2.22021	2.23176	2.20258	2.32708	2.29207	0.920776	0.00117042	0.00185385	-0.00185623	0.0380993	0.0109442	0.00946389	-0.00952638	0.0697996	0.047933
Galnt16	polypeptide N-acetylgalactosaminyltransferase 16 [Source:MGI Symbol;Acc:MGI:1917754]	NA	NA	0	NA	NA	NA	0	NA	NA	0	0	0	NA	196.391	289.136	378.716	456.008	262.936	168.879	399.205	454.179	0.860965	0.00603791	-0.305823	0.252197	0.641564	0.909506	0.284299	-0.354424	0.886718	1.07285
Garem	NA	NA	NA	0	NA	NA	NA	0	NA	NA	0	0	0	NA	784.318	789.133	785.217	863.693	1106.2	829.875	1159.2	1544.64	0.74312	0.0346321	-0.00442234	0.00440883	-0.00276835	0.134659	0.192474	-0.222165	0.26	0.674139
Gba	glucosidase/ beta/ acid [Source:MGI Symbol;Acc:MGI:95665]	NA	NA	0	NA	NA	NA	0	NA	NA	0	0	0	NA	2112.1	1908.77	2388.99	2275.77	1958.32	2019.01	2278.61	2457.01	0.870584	0.00490646	0.0711675	-0.0748611	0.248893	0.178849	-0.0221861	0.0218501	0.196353	0.305107
Gcc1	golgi coiled coil 1 [Source:MGI Symbol;Acc:MGI:1921625]	NA	NA	0	NA	NA	NA	0	NA	NA	0	0	0	NA	1058.42	952.798	1031.68	1118.26	915.517	885.919	988.058	1052.34	0.810513	0.0146834	0.0738413	-0.0778255	0.0369333	0.153183	0.0235112	-0.0239007	0.13352	0.224453
Gda	guanine deaminase [Source:MGI Symbol;Acc:MGI:95678]	NA	NA	0	NA	NA	NA	0	NA	NA	0	0	0	NA	177.011	168.537	280.122	320.104	155.474	166.348	280.801	286.359	0.904252	0.00203988	0.0349534	-0.0358214	0.69717	0.889653	-0.0495882	0.0479403	0.803288	0.831561
Gdf6	growth differentiation factor 6 [Source:MGI Symbol;Acc:MGI:95689]	NA	NA	0	NA	NA	NA	0	NA	NA	0	0	0	NA	74.1498	72.8965	129.26	138.44	76.3671	65.7798	111.235	96.4962	0.715328	0.0460607	0.0122442	-0.012349	0.81401	0.912993	0.10364	-0.111666	0.646228	0.44116
Gdf9	growth differentiation factor 9 [Source:MGI Symbol;Acc:MGI:95692]	NA	NA	0	NA	NA	NA	0	NA	NA	0	0	0	NA	16.2122	16.7119	18.8076	20.251	16.9523	15.9278	19.0826	18.2626	0.752601	0.0311793	-0.0220623	0.02173	0.19217	0.29885	0.0442645	-0.0456657	0.215041	0.151676
Gdnf	glial cell line derived neurotrophic factor [Source:MGI Symbol;Acc:MGI:107430]	NA	NA	0	NA	NA	NA	0	NA	NA	0	0	0	NA	128.6	99.8731	161.647	107.855	104.008	106.171	144.32	163.373	0.780388	0.0223095	0.170866	-0.193856	0.500822	-0.0829334	-0.0149221	0.0147694	0.457651	0.636556
Ghitm	growth hormone inducible transmembrane protein [Source:MGI Symbol;Acc:MGI:1913342]	NA	NA	0	NA	NA	NA	0	NA	NA	0	0	0	NA	8130.54	8794.01	9706.08	9273.94	8564.48	8605.56	9236.12	9944.3	0.79203	0.019126	-0.0576941	0.0554753	0.197843	0.132136	-0.00345627	0.00344801	0.105466	0.212048
Gif	NA	NA	NA	0	NA	NA	NA	0	NA	NA	0	0	0	NA	4.67514	4.54893	4.69729	4.58547	4.66409	4.59328	4.8797	4.84406	0.831297	0.010536	0.0196066	-0.0198767	0.0264257	-0.00833336	0.0109934	-0.0110778	0.0761918	0.0656148
Gla	galactosidase/ alpha [Source:MGI Symbol;Acc:MGI:1347344]	NA	NA	0	NA	NA	NA	0	NA	NA	0	0	0	NA	550.434	539.921	794.397	832.892	614.072	512.571	813.253	785.192	0.83414	0.0100349	0.0138427	-0.0139768	0.543135	0.611403	0.12445	-0.136208	0.529746	0.479088
Glmp	glycosylated lysosomal membrane protein [Source:MGI Symbol;Acc:MGI:1913318]	NA	NA	0	NA	NA	NA	0	NA	NA	0	0	0	NA	2360.58	2248.6	2973.16	2761.77	2398.89	2419.13	2723.37	2812.42	0.713231	0.047004	0.0346325	-0.0354844	0.367485	0.26108	-0.00607566	0.00605018	0.176954	0.223372
Gltp	glycolipid transfer protein [Source:MGI Symbol;Acc:MGI:1929253]	NA	NA	0	NA	NA	NA	0	NA	NA	0	0	0	NA	1438.56	1508.86	1525.36	1657.8	1368.17	1597.97	1618.67	1739.29	0.730981	0.0393811	-0.0348309	0.0340098	0.0497003	0.169813	-0.116337	0.107652	0.126221	0.229911
Gltpd2	glycolipid transfer protein domain containing 2 [Source:MGI Symbol;Acc:MGI:2444527]	NA	NA	0	NA	NA	NA	0	NA	NA	0	0	0	NA	3.70332	3.81371	3.76702	3.87042	3.76598	3.75822	3.87256	3.90208	0.799513	0.0172387	-0.0213432	0.021032	0.00326151	0.0423277	0.00148644	-0.00148797	0.0417495	0.0527046
Gm10471	predicted gene 10471 [Source:MGI Symbol;Acc:MGI:3641900]	NA	NA	0	NA	NA	NA	0	NA	NA	0	0	0	NA	1.33401	1.34499	1.34153	1.34335	1.35045	1.33268	1.36513	1.36515	0.814772	0.0137624	-0.00592914	0.00590487	0.00218957	0.00414489	0.00952585	-0.00958917	0.0251261	0.025144
Gm14023	predicted gene 14023 [Source:MGI Symbol;Acc:MGI:3650639]	NA	NA	0	NA	NA	NA	0	NA	NA	0	0	0	NA	4.69458	4.76108	5.02401	4.90317	4.80151	4.71939	4.94337	5.0544	0.838771	0.0092517	-0.0101823	0.0101109	0.0876605	0.0525348	0.0123897	-0.012497	0.054398	0.0864416
Gm14391	predicted gene 14391 [Source:MGI Symbol;Acc:MGI:3709324]	NA	NA	0	NA	NA	NA	0	NA	NA	0	0	0	NA	10.7511	10.5084	11.1087	11.0559	10.1844	9.99405	10.6098	10.3733	0.8018	0.0166861	0.0163803	-0.0165684	0.0635778	0.056713	0.0135472	-0.0136757	0.0725844	0.0400622
Gm15133	predicted gene 15133 [Source:MGI Symbol;Acc:MGI:3705170]	NA	NA	0	NA	NA	NA	0	NA	NA	0	0	0	NA	9.13453	9.01689	10.0223	9.14279	9.25543	9.33315	10.122	9.7151	0.725827	0.0415107	0.00932019	-0.00938079	0.14313	0.0106251	-0.00604509	0.00601986	0.123083	0.0638837
Gm15412	predicted gene 15412 [Source:MGI Symbol;Acc:MGI:3705100]	NA	NA	0	NA	NA	NA	0	NA	NA	0	0	0	NA	1.90804	1.87333	1.91344	1.89002	1.90005	1.8748	1.93659	1.93663	0.818455	0.0129958	0.0131827	-0.0133042	0.0172609	-0.000510054	0.00961713	-0.00968167	0.0371003	0.0371243
Gm15816	predicted gene 15816 [Source:MGI Symbol;Acc:MGI:3802114]	NA	NA	0	NA	NA	NA	0	NA	NA	0	0	0	NA	1.40956	1.40726	1.43679	1.43076	1.4173	1.40806	1.45382	1.43105	0.860549	0.00609026	0.00117738	-0.00117834	0.0287817	0.0227134	0.00470795	-0.00472336	0.0414166	0.018637
Gm1821	NA	NA	NA	0	NA	NA	NA	0	NA	NA	0	0	0	NA	3531.15	3478.49	3862.11	4374.97	3376.44	3733.13	4088.57	4214.5	0.795599	0.0182104	0.0107983	-0.0108797	0.140049	0.319934	-0.074261	0.0706249	0.201834	0.2456
Gm2a	GM2 ganglioside activator protein [Source:MGI Symbol;Acc:MGI:95762]	NA	NA	0	NA	NA	NA	0	NA	NA	0	0	0	NA	1211.65	1085.39	1481.14	1881.05	1085.87	1108.32	1345.84	1649.98	0.752836	0.0310966	0.0771999	-0.0815657	0.366933	0.711761	-0.0148369	0.0146859	0.294813	0.588759
Gm4013	predicted gene 4013 [Source:MGI Symbol;Acc:MGI:3782187]	NA	NA	0	NA	NA	NA	0	NA	NA	0	0	0	NA	14.5648	15.0499	15.4496	15.1701	14.7074	15.2044	15.7206	15.7217	0.853841	0.00697513	-0.0238247	0.0234376	0.0612542	0.0349151	-0.02417	0.0237717	0.071939	0.0720433
Gm5129	predicted gene 5129 [Source:MGI Symbol;Acc:MGI:3648499]	NA	NA	0	NA	NA	NA	0	NA	NA	0	0	0	NA	8.36697	8.87909	8.73975	8.78054	8.45041	8.54734	8.85448	9.56329	0.76227	0.0278845	-0.0434893	0.0422166	0.0193967	0.0261152	-0.00825066	0.00820374	0.0591353	0.170234
Gm5176	predicted gene 5176 [Source:MGI Symbol;Acc:MGI:3644450]	NA	NA	0	NA	NA	NA	0	NA	NA	0	0	0	NA	4.9905	5.08616	5.14296	5.01053	5.1752	5.06147	5.3836	5.66037	0.81758	0.0131755	-0.0137612	0.0136311	0.0296536	-0.00798256	0.0159406	-0.0161187	0.0728963	0.145222
Gm5544	predicted gene 5544 [Source:MGI Symbol;Acc:MGI:3648209]	NA	NA	0	NA	NA	NA	0	NA	NA	0	0	0	NA	2.10684	2.13262	2.16048	2.1203	2.117	2.12206	2.20539	2.15485	0.806999	0.0154717	-0.00879962	0.00874627	0.0274692	0.000387043	-0.00172478	0.00172273	0.0572893	0.0238427
Gm5617	predicted gene 5617 [Source:MGI Symbol;Acc:MGI:3643566]	NA	NA	0	NA	NA	NA	0	NA	NA	0	0	0	NA	73.9042	74.5731	80.9106	94.6551	68.1907	75.7903	83.3154	94.844	0.826861	0.0113489	-0.00651351	0.00648424	0.124159	0.35051	-0.0782317	0.0742068	0.210777	0.397749
Gm6559	predicted gene 6559 [Source:MGI Symbol;Acc:MGI:3643041]	NA	NA	0	NA	NA	NA	0	NA	NA	0	0	0	NA	1.46687	1.47875	1.48506	1.50059	1.46481	1.46525	1.52453	1.47717	0.761639	0.0280927	-0.0058303	0.00580683	0.0119553	0.0269565	-0.000216687	0.000216655	0.0574306	0.0119018
Gm7361	predicted gene 7361 [Source:MGI Symbol;Acc:MGI:3805965]	NA	NA	0	NA	NA	NA	0	NA	NA	0	0	0	NA	6.66083	6.56317	7.37532	6.89792	6.59935	6.57558	7.58767	6.95741	0.818707	0.0129444	0.0106147	-0.0106934	0.157619	0.0610744	0.00260066	-0.00260536	0.203933	0.0788257
Gnao1	guanine nucleotide binding protein/ alpha O [Source:MGI Symbol;Acc:MGI:95775]	NA	NA	0	NA	NA	NA	0	NA	NA	0	0	0	NA	798.949	626.269	854.74	788.976	989.795	810.248	1183.96	1078.93	0.75755	0.0294645	0.164993	-0.186329	0.262375	0.146871	0.13717	-0.151595	0.395591	0.261569
Gnaz	guanine nucleotide binding protein/ alpha z subunit [Source:MGI Symbol;Acc:MGI:95780]	NA	NA	0	NA	NA	NA	0	NA	NA	0	0	0	NA	25.3226	24.351	28.6035	27.9748	24.9774	24.4135	30.5841	28.7035	0.94842	0.000329933	0.027945	-0.028497	0.20371	0.171645	0.0163777	-0.0165657	0.308536	0.216981
Gng4	guanine nucleotide binding protein (G protein)/ gamma 4 [Source:MGI Symbol;Acc:MGI:102703]	NA	NA	0	NA	NA	NA	0	NA	NA	0	0	0	NA	8.71096	9.01485	9.49352	10.1227	8.8801	8.88889	9.37757	10.2075	0.775146	0.0238436	-0.024948	0.0245239	0.0991637	0.191737	-0.000714461	0.000714107	0.0779245	0.200262
Gnptg	N-acetylglucosamine-1-phosphotransferase/ gamma subunit [Source:MGI Symbol;Acc:MGI:2147006]	NA	NA	0	NA	NA	NA	0	NA	NA	0	0	0	NA	316.121	279.561	387.37	390.671	313.566	262.387	388.639	360.212	0.825632	0.011581	0.0859353	-0.0913801	0.379168	0.391412	0.122819	-0.134256	0.432479	0.322896
Golga2	golgi autoantigen/ golgin subfamily a/ 2 [Source:MGI Symbol;Acc:MGI:2139395]	NA	NA	0	NA	NA	NA	0	NA	NA	0	0	0	NA	4358.2	4212.8	4174.51	4403.33	4027.17	3910.69	4401.75	4318.62	0.797949	0.017623	0.0242686	-0.0246838	-0.0378575	0.0391296	0.0210164	-0.0213271	0.149329	0.121823
Golga5	golgi autoantigen/ golgin subfamily a/ 5 [Source:MGI Symbol;Acc:MGI:1351475]	NA	NA	0	papillarythyroid_Spitzoidtumour	fusion	T	1	NA	NA	0	1	0	NA	1986.06	1839.04	2111.58	2058.68	1939.54	1821.9	2089.34	2042.41	0.803757	0.0162223	0.0544099	-0.0565426	0.142825	0.10622	0.0444279	-0.0458396	0.15176	0.11899
Gosr1	golgi SNAP receptor complex member 1 [Source:MGI Symbol;Acc:MGI:1858260]	NA	NA	0	NA	NA	NA	0	NA	NA	0	0	0	NA	1925.27	1848.89	1846.41	2056.55	1711.57	1874.45	1993.17	2081.56	0.781594	0.0219656	0.0289067	-0.0294977	-0.0314269	0.124075	-0.0670623	0.064083	0.152681	0.21528
Got1l1	glutamic-oxaloacetic transaminase 1-like 1 [Source:MGI Symbol;Acc:MGI:1923865]	NA	NA	0	NA	NA	NA	0	NA	NA	0	0	0	NA	4.48693	4.5076	4.9194	4.7225	4.49827	4.51135	4.83145	4.65382	0.72609	0.0414002	-0.00331946	0.00331184	0.129435	0.0705042	-0.00209712	0.00209407	0.100991	0.0469474
Gpaa1	GPI anchor attachment protein 1 [Source:MGI Symbol;Acc:MGI:1202392]	NA	NA	0	NA	NA	NA	0	NA	NA	0	0	0	NA	822.575	781.617	797.046	801.601	722.892	725.28	817.063	791.236	0.812365	0.0142782	0.0363722	-0.037313	-0.00911083	-0.000889316	-0.00238044	0.00237652	0.174287	0.127948
Gpatch2l	G patch domain containing 2 like [Source:MGI Symbol;Acc:MGI:1917623]	NA	NA	0	NA	NA	NA	0	NA	NA	0	0	0	NA	1067.16	1047.02	1077.52	1097.6	1075.71	969.73	1126.4	1181.94	0.829257	0.0109052	0.0136785	-0.0138095	0.0276187	0.0542531	0.0728788	-0.0767572	0.139309	0.208745
Gpc4	glypican 4 [Source:MGI Symbol;Acc:MGI:104902]	NA	NA	0	NA	NA	NA	0	NA	NA	0	0	0	NA	17625.6	16103.7	24832.1	17181.1	16360.2	14320.8	19165.9	20415.3	0.723127	0.0426535	0.0636678	-0.0666078	0.558206	0.0268184	0.092843	-0.0992313	0.321199	0.412305
Gpr107	G protein-coupled receptor 107 [Source:MGI Symbol;Acc:MGI:2139054]	NA	NA	0	NA	NA	NA	0	NA	NA	0	0	0	NA	2332.18	2458.75	2773.7	2834.24	2322.23	2255.89	2566.01	2751.4	0.848168	0.0077843	-0.0386277	0.0376204	0.211508	0.242657	0.020758	-0.021061	0.16477	0.265408
Gpr108	G protein-coupled receptor 108 [Source:MGI Symbol;Acc:MGI:1925558]	NA	NA	0	NA	NA	NA	0	NA	NA	0	0	0	NA	1053.69	980.58	1112.39	1171.4	1008.03	975.493	1181.63	1094.22	0.855961	0.00668722	0.0509378	-0.0528023	0.129146	0.203721	0.0234731	-0.0238614	0.252718	0.141836
Gpr137b-ps	G protein-coupled receptor 137B/ pseudogene [Source:MGI Symbol;Acc:MGI:3710533]	NA	NA	0	NA	NA	NA	0	NA	NA	0	0	0	NA	696.081	702.658	786.466	749.256	757.517	722.345	851.308	831.507	0.930017	0.000812516	-0.00679923	0.00676734	0.169329	0.099404	0.0338867	-0.0347018	0.202291	0.168338
Gramd3	GRAM domain containing 3 [Source:MGI Symbol;Acc:MGI:1914815]	NA	NA	0	NA	NA	NA	0	NA	NA	0	0	0	NA	683.101	548.385	675.854	685.982	566.708	561.713	626.756	703.464	0.745638	0.0336934	0.14977	-0.167139	0.134383	0.155842	0.00637211	-0.00640038	0.151671	0.318244
Grem1	gremlin 1/ DAN family BMP antagonist [Source:MGI Symbol;Acc:MGI:1344337]	NA	NA	0	NA	NA	NA	0	NA	NA	0	0	0	NA	5470.41	4197.44	7290.49	5639.88	6140.38	8082.41	9388.72	10834.9	0.771344	0.0249964	0.178453	-0.203685	0.592822	0.222469	-0.211805	0.184653	0.400796	0.607484
Gsta4	glutathione S-transferase/ alpha 4 [Source:MGI Symbol;Acc:MGI:1309515]	NA	NA	0	NA	NA	NA	0	NA	NA	0	0	0	NA	393.215	269.381	297.198	420.156	272.624	351.635	428.048	515.054	0.715307	0.0460702	0.24719	-0.298482	-0.156703	0.342797	-0.195231	0.171933	0.455628	0.722579
Gtf2e1	general transcription factor II E/ polypeptide 1 (alpha subunit) [Source:MGI Symbol;Acc:MGI:1921447]	NA	NA	0	NA	NA	NA	0	NA	NA	0	0	0	NA	1031.89	1062.63	1097.3	1155.03	979.951	992.731	1034.43	1079.22	0.787901	0.0202202	-0.0213247	0.0210141	0.067342	0.141305	-0.00937704	0.00931648	0.0686827	0.12983
Gucy2c	guanylate cyclase 2c [Source:MGI Symbol;Acc:MGI:106903]	NA	NA	0	NA	NA	NA	0	NA	NA	0	0	0	NA	1.21125	1.20954	1.22662	1.21004	1.20984	1.22084	1.23979	1.24958	0.880616	0.00388207	0.00101595	-0.00101666	0.019204	-0.000430534	-0.00654515	0.00651559	0.0287312	0.0400879
Guk1	guanylate kinase 1 [Source:MGI Symbol;Acc:MGI:95871]	NA	NA	0	NA	NA	NA	0	NA	NA	0	0	0	NA	673.157	774.776	779.404	773.759	724.979	699.603	782.282	838.571	0.80264	0.0164861	-0.10498	0.0978562	0.10645	0.0959615	0.0254726	-0.0259305	0.135223	0.235466
H2-DMa	histocompatibility 2/ class II/ locus DMa [Source:MGI Symbol;Acc:MGI:95921]	NA	NA	0	NA	NA	NA	0	NA	NA	0	0	0	NA	114.509	109.076	138.373	130.641	115.451	124.417	140.709	139.07	0.804917	0.0159511	0.0346365	-0.0354886	0.307747	0.224791	-0.0549605	0.0529434	0.230468	0.213566
H2-M10.2	histocompatibility 2/ M region locus 10.2 [Source:MGI Symbol;Acc:MGI:1276525]	NA	NA	0	NA	NA	NA	0	NA	NA	0	0	0	NA	17.1788	15.9345	16.4357	17.0022	15.4143	15.9549	18.146	17.0317	0.790737	0.0194645	0.0532183	-0.0552568	-0.0105773	0.0383066	-0.0250816	0.024653	0.210306	0.118874
H2afj	NA	NA	NA	0	NA	NA	NA	0	NA	NA	0	0	0	NA	1794	1887.43	2265.93	2010.16	2142.17	2463.62	2547.07	2775.17	0.729853	0.0398412	-0.0370852	0.0361557	0.299835	0.127046	-0.104377	0.0973322	0.14539	0.269124
H3f3b	H3.3 histone B [Source:MGI Symbol;Acc:MGI:1101768]	NA	NA	0	NA	NA	NA	0	NA	NA	0	0	0	NA	10964	9353.34	10609.9	10794.9	11098.2	8252.67	12119.1	12512.7	0.740322	0.0356938	0.110061	-0.119156	0.0627005	0.0876406	0.197929	-0.229468	0.324885	0.370992
Hacd2	3-hydroxyacyl-CoA dehydratase 2 [Source:MGI Symbol;Acc:MGI:1918007]	NA	NA	0	NA	NA	NA	0	NA	NA	0	0	0	NA	566.193	560.315	576.315	739.068	555.495	527.047	640.708	666.479	0.769289	0.0256334	0.00750805	-0.00754733	0.0330711	0.391922	0.0374217	-0.0384183	0.243317	0.300208
Haus2	HAUS augmin-like complex/ subunit 2 [Source:MGI Symbol;Acc:MGI:1913546]	NA	NA	0	NA	NA	NA	0	NA	NA	0	0	0	NA	752.939	760.459	799.188	779.574	740.887	762.986	786.141	875.987	0.812354	0.0142805	-0.00718675	0.00715112	0.0788151	0.0429663	-0.021357	0.0210454	0.0641768	0.220299
Hddc3	HD domain containing 3 [Source:MGI Symbol;Acc:MGI:1915945]	NA	NA	0	NA	NA	NA	0	NA	NA	0	0	0	NA	47.7455	49.6759	52.4555	56.5589	47.9879	47.1832	52.6588	50.5307	0.707889	0.0494593	-0.0288734	0.0283068	0.106855	0.215516	0.0121476	-0.0122508	0.14615	0.0866362
Heca	hdc homolog/ cell cycle regulator [Source:MGI Symbol;Acc:MGI:2685715]	NA	NA	0	NA	NA	NA	0	NA	NA	0	0	0	NA	1062.96	1137.48	1286.12	1135.12	1159.72	1050.07	1203.77	1372.64	0.761374	0.0281804	-0.049708	0.0480522	0.225235	0.0450572	0.0698677	-0.0734243	0.123652	0.313054
Hectd3	HECT domain E3 ubiquitin protein ligase 3 [Source:MGI Symbol;Acc:MGI:1923858]	NA	NA	0	NA	NA	NA	0	NA	NA	0	0	0	NA	807.168	790.331	929.79	964.879	859.68	767.538	991.046	896.594	0.768898	0.0257557	0.0151259	-0.0152862	0.219162	0.272604	0.0794639	-0.0840972	0.284616	0.140119
Heg1	heart development protein with EGF-like domains 1 [Source:MGI Symbol;Acc:MGI:1924696]	NA	NA	0	NA	NA	NA	0	NA	NA	0	0	0	NA	2603.24	3606.75	3364.5	5412.75	2823.45	2715.23	4016.84	4597.66	0.77981	0.0224756	-0.254281	0.216107	0.115799	0.801771	0.0279148	-0.0284656	0.53652	0.731357
Hes6	hairy and enhancer of split 6 [Source:MGI Symbol;Acc:MGI:1859852]	NA	NA	0	NA	NA	NA	0	NA	NA	0	0	0	NA	328.426	298.458	350.809	346.112	288.809	289.423	320.717	307.918	0.722087	0.0430984	0.0673704	-0.0706712	0.162487	0.143039	-0.00153271	0.00153108	0.149652	0.0908989
Hhex	hematopoietically expressed homeobox [Source:MGI Symbol;Acc:MGI:96086]	NA	NA	0	NA	NA	NA	0	NA	NA	0	0	0	NA	11.2936	11.2402	11.7052	11.9491	10.3933	10.6323	11.4711	11.9687	0.957745	0.000182686	0.00341574	-0.00342384	0.0550572	0.0848143	-0.0164959	0.0163094	0.125857	0.187115
Hif1an	hypoxia-inducible factor 1/ alpha subunit inhibitor [Source:MGI Symbol;Acc:MGI:2442345]	NA	NA	0	NA	NA	NA	0	NA	NA	0	0	1		2048.98	2005.87	2086.76	2198.89	1790.97	1828.26	1987.55	2432.49	0.812333	0.0142851	0.0152561	-0.0154192	0.0416166	0.117125	-0.0149414	0.0147882	0.135309	0.426752
Hif3a	hypoxia inducible factor 3/ alpha subunit [Source:MGI Symbol;Acc:MGI:1859778]	NA	NA	0	NA	NA	NA	0	NA	NA	0	0	0	NA	2.43866	2.44039	2.47724	2.51126	2.39423	2.39543	2.41497	2.47399	0.736883	0.0370254	-0.000510632	0.000510451	0.0221339	0.0418111	-0.000362608	0.000362517	0.012086	0.0469203
Hint2	histidine triad nucleotide binding protein 2 [Source:MGI Symbol;Acc:MGI:1916167]	NA	NA	0	NA	NA	NA	0	NA	NA	0	0	0	NA	157.194	163.612	170.45	185.315	160.569	140.618	172.98	164.386	0.7358	0.0374511	-0.0291527	0.0285752	0.0876455	0.208273	0.0925326	-0.0988767	0.199941	0.126426
Hint3	histidine triad nucleotide binding protein 3 [Source:MGI Symbol;Acc:MGI:1914097]	NA	NA	0	NA	NA	NA	0	NA	NA	0	0	0	NA	186.482	174.075	201.907	199.678	193.821	157.15	211.963	223.745	0.847481	0.00788614	0.0488073	-0.0505165	0.16346	0.14745	0.143374	-0.159211	0.272459	0.350508
Hivep2	human immunodeficiency virus type I enhancer binding protein 2 [Source:MGI Symbol;Acc:MGI:1338076]	NA	NA	0	NA	NA	NA	0	NA	NA	0	0	0	NA	2004.15	2407.3	2670.24	3359.41	3233.64	2149.93	3659.21	3993.71	0.753398	0.0308993	-0.138262	0.126163	0.275711	0.606954	0.264595	-0.324272	0.442967	0.569167
Hmha1	NA	NA	NA	0	NA	NA	NA	0	NA	NA	0	0	0	NA	104.057	103.217	119.622	127.061	67.7229	64.976	89.7718	72.5742	0.801773	0.0166926	0.00583861	-0.00586234	0.206943	0.293979	0.0295592	-0.0301775	0.436177	0.129371
Homez	homeodomain leucine zipper-encoding gene [Source:MGI Symbol;Acc:MGI:2678023]	NA	NA	0	NA	NA	NA	0	NA	NA	0	0	0	NA	251.743	251.548	308.818	353.872	247.799	254.522	294.357	367.809	0.811633	0.0144376	0.000558711	-0.000558927	0.295364	0.491838	-0.0194371	0.0191787	0.228959	0.550349
Hotairm1	Hoxa transcript antisense RNA/ myeloid-specific 1 [Source:MGI Symbol;Acc:MGI:3705155]	NA	NA	0	NA	NA	NA	0	NA	NA	0	0	0	NA	87.713	81.0853	93.3984	83.9366	84.9036	87.4709	92.1821	101.157	0.748629	0.0325988	0.0555619	-0.0577877	0.146169	-0.00792957	-0.0216491	0.021329	0.0970124	0.23105
Hr	lysine demethylase and nuclear receptor corepressor [Source:MGI Symbol;Acc:MGI:96223]	NA	NA	0	NA	NA	NA	0	NA	NA	0	0	1	HM_e	75.9706	71.0598	82.2889	105.137	73.1826	72.2913	84.8778	163.542	0.75035	0.0319791	0.047399	-0.0490093	0.162655	0.516156	0.0088123	-0.00886646	0.222698	1.1689
Hs3st1	heparan sulfate (glucosamine) 3-O-sulfotransferase 1 [Source:MGI Symbol;Acc:MGI:1201606]	NA	NA	0	NA	NA	NA	0	NA	NA	0	0	0	NA	126.741	97.0517	134.023	213.187	93.0026	103.496	154.821	136.257	0.731236	0.0392775	0.179719	-0.205336	0.260324	0.929955	-0.0791762	0.0750561	0.656079	0.471813
Hs3st3b1	heparan sulfate (glucosamine) 3-O-sulfotransferase 3B1 [Source:MGI Symbol;Acc:MGI:1333853]	NA	NA	0	NA	NA	NA	0	NA	NA	0	0	0	NA	873.834	934.024	1283.8	1094.46	763.001	843.764	1092.02	1040.54	0.859858	0.00617798	-0.0488504	0.0472503	0.506139	0.275937	-0.0744019	0.0707523	0.442846	0.373167
Hscb	HscB iron-sulfur cluster co-chaperone [Source:MGI Symbol;Acc:MGI:2141135]	NA	NA	0	NA	NA	NA	0	NA	NA	0	0	0	NA	202.79	193.046	241.535	264.783	196.512	168.416	245.485	205.562	0.741421	0.0352746	0.0350825	-0.0359569	0.287328	0.419907	0.107006	-0.115583	0.428023	0.171962
Hsd11b1	hydroxysteroid 11-beta dehydrogenase 1 [Source:MGI Symbol;Acc:MGI:103562]	NA	NA	0	NA	NA	NA	0	NA	NA	0	0	0	NA	8.80923	8.43845	8.49637	9.0179	8.66182	8.36847	9.59951	9.15808	0.80764	0.0153259	0.0306856	-0.0313525	-0.021484	0.0644604	0.0246391	-0.0250672	0.17293	0.105013
Hsdl2	hydroxysteroid dehydrogenase like 2 [Source:MGI Symbol;Acc:MGI:1919729]	NA	NA	0	NA	NA	NA	0	NA	NA	0	0	0	NA	803.667	755.594	927.131	1068.5	843.835	798.093	1099.93	961.676	0.80132	0.016801	0.0438077	-0.0451797	0.249983	0.454722	0.0396422	-0.0407624	0.422015	0.228233
Hspa13	heat shock protein 70 family/ member 13 [Source:MGI Symbol;Acc:MGI:1309463]	NA	NA	0	NA	NA	NA	0	NA	NA	0	0	0	NA	2854.23	2622.12	2807.89	2936.12	2722.35	2443.65	2890.23	3042.28	0.818913	0.0129025	0.0598849	-0.0624787	0.0362725	0.100695	0.0758036	-0.0800085	0.162136	0.236103
Hspa2	heat shock protein 2 [Source:MGI Symbol;Acc:MGI:96243]	NA	NA	0	NA	NA	NA	0	NA	NA	0	0	0	NA	907.763	1022.12	1154.45	943.816	830.841	939.66	1247.02	1548.14	0.858267	0.00638272	-0.0881222	0.083048	0.25869	-0.0319319	-0.0915138	0.0860535	0.494323	0.806382
Htr6	5-hydroxytryptamine (serotonin) receptor 6 [Source:MGI Symbol;Acc:MGI:1196627]	NA	NA	0	NA	NA	NA	0	NA	NA	0	0	0	NA	4.0721	4.04767	4.10307	4.09191	4.10158	4.17132	4.19087	4.25509	0.820011	0.0126804	0.00433312	-0.00434617	0.0152643	0.0113344	-0.0122119	0.0121094	0.0188577	0.0407955
Hyal1	hyaluronoglucosaminidase 1 [Source:MGI Symbol;Acc:MGI:96298]	NA	NA	0	NA	NA	NA	0	NA	NA	0	0	0	NA	455.23	320.638	788.562	595.531	388.939	347.652	796.892	549.215	0.814223	0.0138788	0.230786	-0.274868	1.02341	0.618366	0.0786809	-0.0832207	1.11352	0.576505
Icam1	intercellular adhesion molecule 1 [Source:MGI Symbol;Acc:MGI:96392]	NA	NA	0	NA	NA	NA	0	NA	NA	0	0	0	NA	353.373	343.729	922.937	1025.28	356.422	329.958	985.32	699.855	0.839549	0.00912401	0.0198229	-0.0200991	1.40486	1.55657	0.0545782	-0.0567244	1.52158	1.02805
Ifi27	interferon/ alpha-inducible protein 27 [Source:MGI Symbol;Acc:MGI:1277180]	NA	NA	0	NA	NA	NA	0	NA	NA	0	0	0	NA	356.819	428.478	866.63	918.982	582.812	452.28	914.581	847.917	0.725008	0.041855	-0.138045	0.125982	1.14218	1.2268	0.171343	-0.194471	0.821425	0.712237
Ifi30	interferon gamma inducible protein 30 [Source:MGI Symbol;Acc:MGI:2137648]	NA	NA	0	NA	NA	NA	0	NA	NA	0	0	0	NA	1047.27	1277.59	1558.77	1966.63	1256.12	1196.18	1665.82	1720.07	0.758655	0.02909	-0.15051	0.136281	0.423263	0.758583	0.0348359	-0.0356979	0.4421	0.488331
Ifi44	interferon-induced protein 44 [Source:MGI Symbol;Acc:MGI:2443016]	NA	NA	0	NA	NA	NA	0	NA	NA	0	0	0	NA	59.671	72.6265	186.997	481.155	54.9333	65.3413	204.714	185.769	0.768737	0.025806	-0.148685	0.134783	1.49923	2.86272	-0.130578	0.119734	1.76727	1.62718
Igfbp2	insulin-like growth factor binding protein 2 [Source:MGI Symbol;Acc:MGI:96437]	NA	NA	0	NA	NA	NA	0	NA	NA	0	0	0	NA	1722.92	2189.7	2651.38	2945.38	1439.64	1313.69	1835.68	3634.21	0.820493	0.0125836	-0.183278	0.162597	0.438611	0.590317	0.0645339	-0.0675563	0.415133	1.40046
Il16	interleukin 16 [Source:MGI Symbol;Acc:MGI:1270855]	NA	NA	0	NA	NA	NA	0	NA	NA	0	0	0	NA	16.1515	15.3215	17.4033	17.5789	16.1146	15.327	17.2756	17.0486	0.78617	0.0206901	0.0375537	-0.0385575	0.145248	0.15973	0.0356945	-0.0366001	0.136062	0.116978
Il1a	interleukin 1 alpha [Source:MGI Symbol;Acc:MGI:96542]	NA	NA	0	NA	NA	NA	0	NA	NA	0	0	0	NA	2.62542	2.62672	2.61318	2.68277	2.5949	2.60145	2.66309	2.66313	0.823657	0.0119601	-0.000358537	0.000358448	-0.00710057	0.0308182	-0.00181904	0.00181675	0.0356002	0.0356246
Il7	interleukin 7 [Source:MGI Symbol;Acc:MGI:96561]	NA	NA	0	NA	NA	NA	0	NA	NA	0	0	0	NA	121.756	92.391	131.071	108.409	80.1422	97.1857	123.772	115.112	0.777881	0.0230355	0.185389	-0.212774	0.291748	0.0178798	-0.145785	0.132396	0.48126	0.376619
Inpp4b	inositol polyphosphate-4-phosphatase/ type II [Source:MGI Symbol;Acc:MGI:2158925]	NA	NA	0	NA	NA	NA	0	NA	NA	0	0	0	NA	66.7857	52.7533	64.3593	65.3054	50.6819	46.7175	62.2159	54.8195	0.736353	0.0372336	0.16013	-0.180149	0.106738	0.127793	0.0575577	-0.0599498	0.353369	0.170777
Ip6k3	inositol hexaphosphate kinase 3 [Source:MGI Symbol;Acc:MGI:3045325]	NA	NA	0	NA	NA	NA	0	NA	NA	0	0	0	NA	1.63844	1.63532	1.65855	1.64956	1.65825	1.63641	1.66313	1.72881	0.744658	0.0340568	0.00137268	-0.00137399	0.0189702	0.0111281	0.00953024	-0.00959362	0.013773	0.0696515
Iqcg	IQ motif containing G [Source:MGI Symbol;Acc:MGI:1916957]	NA	NA	0	NA	NA	NA	0	NA	NA	0	0	0	NA	31.1391	27.4632	31.4738	30.4289	26.5426	27.251	34.646	30.6966	0.848144	0.00778773	0.0877713	-0.0934591	0.103194	0.0544829	-0.0191246	0.0188744	0.365255	0.190647
Iqck	IQ motif containing K [Source:MGI Symbol;Acc:MGI:3612188]	NA	NA	0	NA	NA	NA	0	NA	NA	0	0	0	NA	23.5496	21.446	21.661	22.3687	20.8509	19.5257	23.2955	24.4409	0.746336	0.033436	0.0659185	-0.0690752	-0.0546817	-0.00830216	0.0465888	-0.0481437	0.206532	0.27578
Iqgap2	IQ motif containing GTPase activating protein 2 [Source:MGI Symbol;Acc:MGI:2449975]	NA	NA	0	NA	NA	NA	0	NA	NA	0	0	0	NA	335.392	389.365	405.389	535.423	291.839	249.374	392.727	346.512	0.800972	0.0168848	-0.111649	0.103626	0.16181	0.563182	0.108978	-0.117887	0.537329	0.356711
Iqsec1	IQ motif and Sec7 domain 1 [Source:MGI Symbol;Acc:MGI:1196356]	NA	NA	0	NA	NA	NA	0	NA	NA	0	0	0	NA	4087.84	3804.83	4403.66	4340.2	3636.18	3689	3974.98	4267.34	0.853328	0.00704592	0.0508257	-0.0526819	0.15819	0.137247	-0.0104404	0.0103654	0.118084	0.220474
Ireb2	iron responsive element binding protein 2 [Source:MGI Symbol;Acc:MGI:1928268]	NA	NA	0	NA	NA	NA	0	NA	NA	0	0	0	NA	4976.07	4949.38	5611.61	5425.56	5264.69	5071.47	5664.85	5828.33	0.872391	0.00471045	0.00387477	-0.0038852	0.177282	0.128639	0.0267201	-0.0272243	0.13241	0.173453
Isg15	ISG15 ubiquitin-like modifier [Source:MGI Symbol;Acc:MGI:1855694]	NA	NA	0	NA	NA	NA	0	NA	NA	0	0	0	NA	104.957	112.547	619.841	2071.28	104.226	104.01	745.045	420.249	0.746352	0.0334302	-0.0512455	0.0494875	2.51085	4.25141	0.00149144	-0.00149298	2.83911	2.01302
Islr2	immunoglobulin superfamily containing leucine-rich repeat 2 [Source:MGI Symbol;Acc:MGI:2444277]	NA	NA	0	NA	NA	NA	0	NA	NA	0	0	0	NA	6.81122	6.71191	7.17241	7.15852	6.84304	7.02657	7.69514	7.05504	0.725261	0.0417487	0.0105566	-0.0106344	0.085101	0.0823046	-0.019218	0.0189653	0.150093	0.0247983
Ism1	isthmin 1/ angiogenesis inhibitor [Source:MGI Symbol;Acc:MGI:2442963]	NA	NA	0	NA	NA	NA	0	NA	NA	0	0	0	NA	88.9407	69.231	88.3512	86.9807	69.4246	80.8659	88.1639	140.875	0.741378	0.035291	0.169424	-0.192001	0.159831	0.137276	-0.114235	0.105849	0.230507	0.906664
Itfg3	NA	NA	NA	0	NA	NA	NA	0	NA	NA	0	0	0	NA	1441.67	1458.96	1672.54	1742.45	1505.06	1390.42	1707.38	1781.67	0.904827	0.00200428	-0.00862521	0.00857395	0.205676	0.264753	0.0560196	-0.058283	0.237981	0.299429
Itga7	integrin alpha 7 [Source:MGI Symbol;Acc:MGI:102700]	NA	NA	0	NA	NA	NA	0	NA	NA	0	0	0	NA	478.513	994.811	1110.55	876.578	888.166	781.294	1158.72	1501.72	0.707605	0.0495922	-0.622443	0.433419	0.592204	0.25088	0.0895203	-0.0954448	0.473145	0.847232
Itga8	integrin alpha 8 [Source:MGI Symbol;Acc:MGI:109442]	NA	NA	0	NA	NA	NA	0	NA	NA	0	0	0	NA	3617.52	3601	4316.24	4273.62	4027.53	3396.33	4067.96	4902.89	0.7562	0.0299267	0.00329652	-0.00330407	0.258073	0.243754	0.117725	-0.128192	0.132135	0.401464
Itm2c	integral membrane protein 2C [Source:MGI Symbol;Acc:MGI:1927594]	NA	NA	0	NA	NA	NA	0	NA	NA	0	0	0	NA	6909.51	6853.54	9763.1	10173.5	7117.18	6427.12	8780.85	9112.56	0.791066	0.019378	0.00585495	-0.00587881	0.504611	0.564021	0.0716919	-0.0754416	0.374747	0.428243
Itpk1	inositol 1/3/4-triphosphate 5/6 kinase [Source:MGI Symbol;Acc:MGI:2446159]	NA	NA	0	NA	NA	NA	0	NA	NA	0	0	0	NA	126.978	119.829	141.62	131.217	131.262	114.376	148.93	156.384	0.89903	0.00238251	0.0411945	-0.0424054	0.198651	0.0885768	0.0959165	-0.10275	0.278101	0.348566
Itpkc	inositol 1/4/5-trisphosphate 3-kinase C [Source:MGI Symbol;Acc:MGI:2442554]	NA	NA	0	NA	NA	NA	0	NA	NA	0	0	0	NA	469.207	578.45	648.074	555.565	582.454	496.475	649.676	704.044	0.774404	0.024066	-0.15887	0.143097	0.307064	0.0848607	0.110617	-0.119808	0.268192	0.384137
Jmy	junction-mediating and regulatory protein [Source:MGI Symbol;Acc:MGI:1913096]	NA	NA	0	NA	NA	NA	0	NA	NA	0	0	0	NA	3124.45	2922.86	3892.45	3660.48	3290.86	2961.69	4025.18	3863.64	0.87473	0.0044643	0.0473094	-0.0489135	0.364385	0.27574	0.0740197	-0.0780238	0.36461	0.305518
Kank3	KN motif and ankyrin repeat domains 3 [Source:MGI Symbol;Acc:MGI:1098615]	NA	NA	0	NA	NA	NA	0	NA	NA	0	0	0	NA	165.438	163.504	240.013	252.171	193.681	167.112	306.732	220.071	0.788304	0.0201116	0.00846016	-0.00851006	0.545278	0.616571	0.10251	-0.110355	0.765809	0.286795
Kbtbd11	kelch repeat and BTB (POZ) domain containing 11 [Source:MGI Symbol;Acc:MGI:1922151]	NA	NA	0	NA	NA	NA	0	NA	NA	0	0	0	NA	9.4516	9.55008	9.45513	10.1793	9.93956	9.25279	10.5403	10.1927	0.756927	0.0296773	-0.00749645	0.0074577	-0.00695819	0.0995069	0.0507223	-0.0525707	0.135388	0.0870076
Kcnab2	potassium voltage-gated channel/ shaker-related subfamily/ beta member 2 [Source:MGI Symbol;Acc:MGI:109239]	NA	NA	0	NA	NA	NA	0	NA	NA	0	0	0	NA	94.5759	97.4513	95.5264	112.711	83.8799	86.7838	107.451	102.574	0.878114	0.00412317	-0.0217663	0.0214428	-0.00733973	0.231316	-0.0247597	0.0243419	0.332528	0.265513
Kcnh3	potassium voltage-gated channel/ subfamily H (eag-related)/ member 3 [Source:MGI Symbol;Acc:MGI:1341723]	NA	NA	0	NA	NA	NA	0	NA	NA	0	0	0	NA	3.23401	3.13631	3.33826	3.14994	3.14449	3.12476	3.27895	3.25363	0.712108	0.047514	0.0219576	-0.0222969	0.0677317	-0.0160426	0.00453274	-0.00454702	0.0649431	0.0537559
Kcnmb4os2	potassium large conductance calcium-activated channel/ subfamily M/ beta member 4/ opposite strand 2 [Source:MGI Symbol;Acc:MGI:1918263]	NA	NA	0	NA	NA	NA	0	NA	NA	0	0	0	NA	4.08642	3.95876	4.0258	4.04222	3.9973	4.01646	4.32939	4.17281	0.802541	0.0165094	0.0227132	-0.0230765	0.0011504	0.00702288	-0.00345372	0.00344547	0.111686	0.0585408
Kdm4b	lysine (K)-specific demethylase 4B [Source:MGI Symbol;Acc:MGI:2442355]	NA	NA	0	NA	NA	NA	0	NA	NA	0	0	1	HM_e	1008.4	943.488	1053.49	1058.96	960.947	883.973	1025.99	1025.69	0.847742	0.00784739	0.0471971	-0.0487935	0.110304	0.117772	0.0589707	-0.0614842	0.153456	0.153042
Kdm5a	lysine (K)-specific demethylase 5A [Source:MGI Symbol;Acc:MGI:2136980]	NA	NA	0	AML	oncogene_fusion	T	1	CM	Act	1	1	1	HM_e	3808.79	3879.35	4137.97	4075.4	4103.95	3386.06	4381.12	4106.6	0.719404	0.0442603	-0.0133011	0.0131796	0.10629	0.0843067	0.132046	-0.145361	0.226334	0.132979
Kdm5b	lysine (K)-specific demethylase 5B [Source:MGI Symbol;Acc:MGI:1922855]	NA	NA	0	NA	NA	NA	0	NA	NA	0	0	1	HM_e	6227.5	5967.89	6996.84	7338.46	6759.3	5727.31	7283.02	7328.21	0.784917	0.0210348	0.0303892	-0.0310432	0.19844	0.267213	0.114564	-0.124452	0.222226	0.23115
Kdm7a	lysine (K)-specific demethylase 7A [Source:MGI Symbol;Acc:MGI:2443388]	NA	NA	0	NA	NA	NA	0	NA	NA	0	0	1	HM_e	1346.65	1152.32	1378.67	1321.87	1347.35	1078.25	1513.77	1879.92	0.812796	0.0141851	0.108042	-0.116793	0.141939	0.0812437	0.151779	-0.169645	0.319804	0.632326
Kif13b	kinesin family member 13B [Source:MGI Symbol;Acc:MGI:1098265]	NA	NA	0	NA	NA	NA	0	NA	NA	0	0	0	NA	916.877	791.651	1044.95	1031.96	840.486	796.135	1151.92	973.992	0.868967	0.0050862	0.102047	-0.109818	0.290673	0.272628	0.0385752	-0.039635	0.493326	0.251262
Kif1a	kinesin family member 1A [Source:MGI Symbol;Acc:MGI:108391]	KIRC	tsg	1	NA	NA	NA	0	NA	NA	0	1	0	NA	6059.91	6175.09	9379.93	9168.88	5605.81	7586.5	9512.49	10742.2	0.851549	0.00729523	-0.0136456	0.0135178	0.616634	0.583803	-0.234703	0.201809	0.528198	0.703591
Kif21a	kinesin family member 21A [Source:MGI Symbol;Acc:MGI:109188]	NA	NA	0	NA	NA	NA	0	NA	NA	0	0	0	NA	393	410.161	609.481	552.74	497.599	514.471	702.177	719.059	0.867305	0.00527531	-0.0311599	0.0305011	0.601892	0.460911	-0.024253	0.023852	0.472598	0.506874
Kif3b	kinesin family member 3B [Source:MGI Symbol;Acc:MGI:107688]	NA	NA	0	NA	NA	NA	0	NA	NA	0	0	0	NA	1863.65	1858.49	2198.87	2070.21	1746.84	1944.8	1970.89	2502.74	0.754834	0.0303983	0.001999	-0.00200178	0.240628	0.15364	-0.0795172	0.0753624	0.0945831	0.439249
Klc4	kinesin light chain 4 [Source:MGI Symbol;Acc:MGI:1922014]	NA	NA	0	NA	NA	NA	0	NA	NA	0	0	0	NA	489.459	465.878	610.875	605.659	518.182	461.788	617.517	644.972	0.886692	0.00333473	0.0351794	-0.0360587	0.354867	0.342495	0.0807219	-0.0855076	0.333742	0.396499
Klhdc1	kelch domain containing 1 [Source:MGI Symbol;Acc:MGI:2672853]	NA	NA	0	NA	NA	NA	0	NA	NA	0	0	0	NA	148.339	137.542	169.215	171.661	135.738	166.976	193.337	172.783	0.768277	0.0259509	0.0534821	-0.0555414	0.243442	0.264144	-0.157129	0.141684	0.353166	0.191005
Klhl11	kelch-like 11 [Source:MGI Symbol;Acc:MGI:2388648]	NA	NA	0	NA	NA	NA	0	NA	NA	0	0	0	NA	1246.49	1213.21	1307.44	1288.48	1214.31	1131.32	1236.09	1392.33	0.794766	0.0184217	0.0193865	-0.0196506	0.0882559	0.0671811	0.0501624	-0.0519696	0.0758036	0.24752
Klhl12	kelch-like 12 [Source:MGI Symbol;Acc:MGI:2385619]	NA	NA	0	NA	NA	NA	0	NA	NA	0	0	0	NA	518.472	545.386	524.378	518.274	494.867	500.931	554.389	581.529	0.76307	0.0276222	-0.0369677	0.0360441	-0.0206262	-0.0375171	-0.00881243	0.00875892	0.155046	0.223999
Klhl15	kelch-like 15 [Source:MGI Symbol;Acc:MGI:1923400]	NA	NA	0	NA	NA	NA	0	NA	NA	0	0	0	NA	182.439	190.297	207.977	188.852	184.344	187.734	197.721	207.797	0.771568	0.0249275	-0.0307417	0.0301003	0.158268	0.0191038	-0.0132055	0.0130857	0.0878566	0.15957
Klhl24	kelch-like 24 [Source:MGI Symbol;Acc:MGI:1923035]	NA	NA	0	NA	NA	NA	0	NA	NA	0	0	0	NA	2350.93	2362.07	3367.44	3642.47	2991.62	1937.87	3381.79	3493.53	0.731247	0.0392729	-0.00341353	0.00340547	0.515008	0.628273	0.27949	-0.346969	0.45635	0.503248
Kndc1	kinase non-catalytic C-lobe domain (KIND) containing 1 [Source:MGI Symbol;Acc:MGI:1923734]	NA	NA	0	NA	NA	NA	0	NA	NA	0	0	0	NA	2.29757	2.29143	2.41761	2.33052	2.2925	2.31388	2.34968	2.40505	0.730283	0.0396653	0.00192904	-0.00193162	0.075401	0.0224669	-0.00671296	0.00668187	0.0288314	0.0624346
L1cam	L1 cell adhesion molecule [Source:MGI Symbol;Acc:MGI:96721]	NA	NA	0	NA	NA	NA	0	NA	NA	0	0	0	NA	121.628	85.4599	119.576	98.3986	94.9919	81.7099	127.454	131.638	0.775939	0.0236075	0.232234	-0.276927	0.207679	-0.0735373	0.104559	-0.112734	0.528656	0.575255
L3mbtl3	L3MBTL3 histone methyl-lysine binding protein [Source:MGI Symbol;Acc:MGI:2143628]	NA	NA	0	NA	NA	NA	0	NA	NA	0	0	1		1318.96	1086.93	1400.4	1513.91	1215.01	1091.01	1536.91	1273.45	0.719491	0.0442223	0.13283	-0.146311	0.219263	0.331707	0.0755628	-0.0797403	0.414624	0.14333
Laptm4b	lysosomal-associated protein transmembrane 4B [Source:MGI Symbol;Acc:MGI:1890494]	NA	NA	0	NA	NA	NA	0	NA	NA	0	0	0	NA	1182.99	1109.43	1695.22	1672.9	1209.65	1179.31	1505.46	1573.28	0.743775	0.0343865	0.0455676	-0.0470539	0.564599	0.545481	0.0182098	-0.0184426	0.333824	0.397389
Larp6	La ribonucleoprotein domain family/ member 6 [Source:MGI Symbol;Acc:MGI:1914807]	NA	NA	0	NA	NA	NA	0	NA	NA	0	0	0	NA	112.532	107.828	127.37	156.161	115.143	110.086	152.849	148.534	0.881031	0.00384289	0.0304714	-0.0311289	0.209171	0.50318	0.0320352	-0.0327628	0.44072	0.399404
Lclat1	lysocardiolipin acyltransferase 1 [Source:MGI Symbol;Acc:MGI:2684937]	NA	NA	0	NA	NA	NA	0	NA	NA	0	0	0	NA	2975.36	3674.87	3586.62	3604.98	3572.47	3869.69	4121.92	5028.48	0.74	0.0358174	-0.16034	0.144289	0.10922	0.116586	-0.058798	0.0564952	0.147594	0.434402
Lcmt1	leucine carboxyl methyltransferase 1 [Source:MGI Symbol;Acc:MGI:1353593]	NA	NA	0	NA	NA	NA	0	NA	NA	0	0	0	NA	478.396	460.698	529.771	545.357	483.654	495.12	549.15	551.845	0.840491	0.00897091	0.0269363	-0.0274488	0.174101	0.215931	-0.0169996	0.0168016	0.166223	0.173288
Lcmt2	leucine carboxyl methyltransferase 2 [Source:MGI Symbol;Acc:MGI:1353659]	NA	NA	0	NA	NA	NA	0	NA	NA	0	0	0	NA	239.525	237.305	245.389	258.5	208.546	237.432	240.118	297.037	0.74302	0.0346697	0.00669886	-0.00673011	0.0415974	0.116691	-0.0966098	0.0905444	0.106772	0.41367
Ldhb	lactate dehydrogenase B [Source:MGI Symbol;Acc:MGI:96763]	NA	NA	0	NA	NA	NA	0	NA	NA	0	0	0	NA	1026.34	904.526	1363.45	1407.5	977.118	905.879	1184.02	1234.22	0.74805	0.032809	0.0882603	-0.0940138	0.498017	0.543883	0.0535734	-0.0556398	0.330658	0.390564
Leprot	leptin receptor overlapping transcript [Source:MGI Symbol;Acc:MGI:2687005]	NA	NA	0	NA	NA	NA	0	NA	NA	0	0	0	NA	2639.52	2755.7	2941.77	3121.89	2826.77	2751.47	3030.11	3104.65	0.780079	0.0223982	-0.0314049	0.0307358	0.125005	0.21074	0.0193436	-0.0196065	0.119563	0.15462
Lgals3bp	lectin/ galactoside-binding/ soluble/ 3 binding protein [Source:MGI Symbol;Acc:MGI:99554]	NA	NA	0	NA	NA	NA	0	NA	NA	0	0	0	NA	1151.3	964.905	3487.16	7034.41	1316.88	1037.39	3704.79	2942.43	0.724835	0.041928	0.121787	-0.133023	1.72057	2.73295	0.161844	-0.182322	1.65411	1.32173
Lin7b	lin-7 homolog B (C. elegans) [Source:MGI Symbol;Acc:MGI:1330858]	NA	NA	0	NA	NA	NA	0	NA	NA	0	0	0	NA	6.21123	6.45467	6.49479	6.378	6.24364	6.35265	6.52806	6.5283	0.789449	0.0198055	-0.0279986	0.0274655	0.0364053	0.010226	-0.0125394	0.0124313	0.0517287	0.0517806
Lipa	lysosomal acid lipase A [Source:MGI Symbol;Acc:MGI:96789]	NA	NA	0	NA	NA	NA	0	NA	NA	0	0	0	NA	2611.58	2589.78	3941.46	4941.85	3037.19	2520.83	5300.15	4208.82	0.854356	0.00690446	0.0060345	-0.00605985	0.599838	0.926161	0.128166	-0.140672	0.931463	0.598846
Lman2	lectin/ mannose-binding 2 [Source:MGI Symbol;Acc:MGI:1914140]	NA	NA	0	NA	NA	NA	0	NA	NA	0	0	0	NA	5025.43	5228.72	5480.44	5623.54	4778.46	5147.63	5156.94	5862.19	0.739662	0.0359472	-0.0288876	0.0283205	0.0961549	0.133343	-0.0546802	0.0526832	0.0552889	0.240215
Lmbr1	limb region 1 [Source:MGI Symbol;Acc:MGI:1861746]	NA	NA	0	NA	NA	NA	0	NA	NA	0	0	0	NA	581.08	532.145	633.877	584.18	592.983	499.781	669.433	614.429	0.769158	0.0256742	0.0620641	-0.0648546	0.18753	0.0697389	0.11808	-0.128612	0.29303	0.169337
Lmbrd1	LMBR1 domain containing 1 [Source:MGI Symbol;Acc:MGI:1915671]	NA	NA	0	NA	NA	NA	0	NA	NA	0	0	0	NA	1634.59	1553.66	1854.48	1954.05	1714.89	1655.7	1887.59	1998.3	0.791121	0.0193634	0.0361665	-0.0370965	0.218248	0.293706	0.0251161	-0.0255611	0.163547	0.245772
Lonp2	lon peptidase 2/ peroxisomal [Source:MGI Symbol;Acc:MGI:1914137]	NA	NA	0	NA	NA	NA	0	NA	NA	0	0	0	NA	2400.02	2234.17	2485.3	2671.62	2324.22	2324.88	2470.97	2626.3	0.7352	0.0376882	0.0507295	-0.0525785	0.101101	0.205398	-0.000204398	0.000204369	0.0881264	0.176079
Lox	lysyl oxidase [Source:MGI Symbol;Acc:MGI:96817]	NA	NA	0	NA	NA	NA	0	BC	LoF	1	1	0	NA	119723	133725	146000	149766	116975	113374	138220	170359	0.894118	0.00273692	-0.0819855	0.0775759	0.204276	0.241016	0.02238	-0.0227326	0.263144	0.564762
Lpin2	lipin 2 [Source:MGI Symbol;Acc:MGI:1891341]	NA	NA	0	NA	NA	NA	0	NA	NA	0	0	0	NA	1180.12	1015	1163.71	1133.52	1010.51	1022.7	1134.38	1326.44	0.788117	0.0201621	0.104636	-0.112823	0.0844295	0.0465107	-0.00867481	0.00862296	0.158148	0.383802
Lppr2	NA	NA	NA	0	NA	NA	NA	0	NA	NA	0	0	0	NA	713.85	605.641	718.275	673.015	627.055	604.091	709.464	718.191	0.795431	0.0182529	0.113711	-0.123447	0.122627	0.0287301	0.0266619	-0.0271639	0.204798	0.222437
Lrba	LPS-responsive beige-like anchor [Source:MGI Symbol;Acc:MGI:1933162]	NA	NA	0	NA	NA	NA	0	NA	NA	0	0	0	NA	1123.21	1043.68	1300.01	1409.14	1001.18	871.783	1459.22	1136.74	0.861352	0.00598955	0.0520002	-0.0539448	0.26289	0.379188	0.0963808	-0.103283	0.63987	0.279577
Lrfn1	leucine rich repeat and fibronectin type III domain containing 1 [Source:MGI Symbol;Acc:MGI:2136810]	NA	NA	0	NA	NA	NA	0	NA	NA	0	0	0	NA	96.1689	87.003	123.058	146.076	94.4852	95.2551	126.648	118.738	0.72372	0.0424009	0.0704446	-0.0740617	0.426145	0.673523	-0.00586521	0.00584146	0.416802	0.323753
Lrpap1	low density lipoprotein receptor-related protein associated protein 1 [Source:MGI Symbol;Acc:MGI:96829]	NA	NA	0	NA	NA	NA	0	NA	NA	0	0	0	NA	2476.44	2328.39	2886.22	3482.68	2103.74	2278.81	2629.56	2914.09	0.769849	0.0254586	0.0437833	-0.0451538	0.264698	0.535715	-0.0588155	0.0565113	0.263052	0.411276
Lrrc14	leucine rich repeat containing 14 [Source:MGI Symbol;Acc:MGI:2445060]	NA	NA	0	NA	NA	NA	0	NA	NA	0	0	0	NA	575.036	602.829	584.17	612.541	541.267	557.077	570.175	643.813	0.708254	0.0492894	-0.0344498	0.0336463	-0.0117142	0.0567039	-0.0209186	0.0206196	0.0541455	0.229384
Lrrc2	leucine rich repeat containing 2 [Source:MGI Symbol;Acc:MGI:1921499]	NA	NA	0	NA	NA	NA	0	NA	NA	0	0	0	NA	1.06276	1.0767	1.06879	1.07019	1.06869	1.06173	1.07888	1.07889	0.720653	0.043717	-0.0094341	0.00937281	-0.0012655	0.000627058	0.0047077	-0.00472311	0.0184003	0.0184124
Lrrc23	leucine rich repeat containing 23 [Source:MGI Symbol;Acc:MGI:1315192]	NA	NA	0	NA	NA	NA	0	NA	NA	0	0	0	NA	1.10807	1.11748	1.11456	1.11604	1.11446	1.10716	1.12516	1.13412	0.837323	0.00949225	-0.00611068	0.00608491	0.00230744	0.00422074	0.0047314	-0.00474697	0.0185235	0.0299687
Lrrc24	leucine rich repeat containing 24 [Source:MGI Symbol;Acc:MGI:3605040]	NA	NA	0	NA	NA	NA	0	NA	NA	0	0	0	NA	66.3989	64.2372	62.8086	67.5903	56.7885	59.0817	66.6337	76.5282	0.787992	0.0201955	0.0236777	-0.0240728	-0.0565205	0.0493341	-0.0288386	0.0282734	0.201816	0.401555
Lrrc43	leucine rich repeat containing 43 [Source:MGI Symbol;Acc:MGI:2685907]	NA	NA	0	NA	NA	NA	0	NA	NA	0	0	0	NA	1.67262	1.66936	1.69313	1.6703	1.68141	1.68529	1.75171	1.72498	0.884837	0.00349616	0.00140597	-0.00140734	0.0189837	-0.000595734	-0.00166692	0.001665	0.0574323	0.0352493
Lrrc46	leucine rich repeat containing 46 [Source:MGI Symbol;Acc:MGI:1916547]	NA	NA	0	NA	NA	NA	0	NA	NA	0	0	0	NA	16.4158	16.5934	17.3015	18.3231	16.1701	14.8771	18.4764	16.6154	0.809682	0.0148675	-0.00778445	0.00774267	0.068031	0.150795	0.0588639	-0.0613681	0.251218	0.0980537
Lrrc51	leucine rich repeat containing 51 [Source:MGI Symbol;Acc:MGI:1916608]	NA	NA	0	NA	NA	NA	0	NA	NA	0	0	0	NA	96.9705	98.8556	113.327	96.6309	100.33	89.0274	110.751	105.046	0.725451	0.0416684	-0.0139548	0.0138211	0.210917	-0.0190171	0.0836378	-0.0887866	0.226214	0.149918
Lrrc57	leucine rich repeat containing 57 [Source:MGI Symbol;Acc:MGI:1913856]	NA	NA	0	NA	NA	NA	0	NA	NA	0	0	0	NA	505.13	505.748	528.287	519.094	434.85	472.907	499.889	519.05	0.87839	0.00409607	-0.000881662	0.000881123	0.0637859	0.0384591	-0.0617878	0.0592499	0.139301	0.193569
Lrriq3	leucine-rich repeats and IQ motif containing 3 [Source:MGI Symbol;Acc:MGI:1921685]	NA	NA	0	NA	NA	NA	0	NA	NA	0	0	0	NA	22.4815	21.655	23.4906	22.7618	21.7383	20.7029	22.6629	22.3716	0.806426	0.0156027	0.0267653	-0.0272712	0.0901125	0.0446451	0.0347715	-0.0356303	0.094867	0.0762009
Lrrn4cl	LRRN4 C-terminal like [Source:MGI Symbol;Acc:MGI:1916102]	NA	NA	0	NA	NA	NA	0	NA	NA	0	0	0	NA	374.549	475.919	879.023	1205.93	687.431	434.754	1188.94	920.345	0.720312	0.043865	-0.183102	0.162459	1.04764	1.50382	0.292976	-0.36804	1.08336	0.713937
Ltb4r1	leukotriene B4 receptor 1 [Source:MGI Symbol;Acc:MGI:1309472]	NA	NA	0	NA	NA	NA	0	NA	NA	0	0	0	NA	37.5164	33.9905	56.5877	51.8288	36.3644	33.7965	67.1684	49.7845	0.895024	0.00266915	0.0694387	-0.0729506	0.662405	0.535671	0.0518594	-0.0537933	0.937117	0.505029
Ltb4r2	leukotriene B4 receptor 2 [Source:MGI Symbol;Acc:MGI:1888501]	NA	NA	0	NA	NA	NA	0	NA	NA	0	0	0	NA	45.5245	40.9424	72.9073	78.3917	44.7635	40.5137	89.7458	55.5419	0.78737	0.0203637	0.0744963	-0.0785535	0.753915	0.858553	0.0701629	-0.0737503	1.07368	0.381415
Ltc4s	leukotriene C4 synthase [Source:MGI Symbol;Acc:MGI:107498]	NA	NA	0	NA	NA	NA	0	NA	NA	0	0	0	NA	18.6961	17.4394	19.3367	18.732	18.6488	17.9506	21.1569	19.0251	0.749983	0.0321105	0.0493211	-0.0510671	0.0979236	0.0520887	0.027259	-0.027784	0.20931	0.0560804
Ly96	lymphocyte antigen 96 [Source:MGI Symbol;Acc:MGI:1341909]	NA	NA	0	NA	NA	NA	0	NA	NA	0	0	0	NA	115.937	116.344	143.882	138.404	136.48	114.87	144.004	157.617	0.781875	0.021886	-0.00252781	0.00252339	0.309016	0.25301	0.118996	-0.1297	0.196416	0.326727
Lyrm1	LYR motif containing 1 [Source:MGI Symbol;Acc:MGI:1921169]	NA	NA	0	NA	NA	NA	0	NA	NA	0	0	0	NA	124.815	121.498	152.605	125.125	123.228	133.036	158.021	143.472	0.75437	0.0305597	0.0192974	-0.0195591	0.30931	0.0228779	-0.0563023	0.0541873	0.302482	0.163134
Man1c1	mannosidase/ alpha/ class 1C/ member 1 [Source:MGI Symbol;Acc:MGI:2446214]	NA	NA	0	NA	NA	NA	0	NA	NA	0	0	0	NA	1882.11	1993.57	2259.44	2453.81	1699.41	1393.21	1952.78	1801.54	0.772489	0.0246458	-0.0420986	0.0409049	0.221515	0.340575	0.136207	-0.15042	0.336697	0.220401
Map3k15	mitogen-activated protein kinase kinase kinase 15 [Source:MGI Symbol;Acc:MGI:2448588]	NA	NA	0	NA	NA	NA	0	NA	NA	0	0	0	NA	86.7872	81.3127	111.046	103.053	98.1709	77.2667	126.157	97.1228	0.709769	0.0485869	0.0462355	-0.0477664	0.401834	0.294065	0.16241	-0.18304	0.524258	0.146924
Map3k2	mitogen-activated protein kinase kinase kinase 2 [Source:MGI Symbol;Acc:MGI:1346873]	NA	NA	0	NA	NA	NA	0	NA	NA	0	0	0	NA	3859.47	3397.45	4033.87	3788.47	4048.75	3656.98	4241.33	4297.82	0.70758	0.0496037	0.0890459	-0.0949056	0.152808	0.0622593	0.0715448	-0.0752788	0.138585	0.157672
Map7	microtubule-associated protein 7 [Source:MGI Symbol;Acc:MGI:1328328]	NA	NA	0	NA	NA	NA	0	NA	NA	0	0	0	NA	62.623	72.3998	94.358	82.7969	63.7275	70.323	105.204	139.734	0.93815	0.000564417	-0.108439	0.100855	0.483014	0.294445	-0.0727889	0.0692921	0.65041	1.05991
Mapkapk3	mitogen-activated protein kinase-activated protein kinase 3 [Source:MGI Symbol;Acc:MGI:2143163]	NA	NA	0	NA	NA	NA	0	NA	NA	0	0	0	NA	859.861	762.75	952.89	859.847	739.503	903.03	919.93	1220.13	0.742835	0.0347396	0.0838581	-0.0890349	0.232064	0.083834	-0.151294	0.136923	0.163674	0.571112
Mapkbp1	mitogen-activated protein kinase binding protein 1 [Source:MGI Symbol;Acc:MGI:1347004]	NA	NA	0	NA	NA	NA	0	NA	NA	0	0	0	NA	1646.06	1425.91	1701.64	1588.67	1403.91	1524.4	1679.26	1829.43	0.825151	0.0116725	0.0998555	-0.107284	0.147767	0.0486543	-0.0606196	0.0581748	0.197759	0.321327
Mapre3	microtubule-associated protein/ RP/EB family/ member 3 [Source:MGI Symbol;Acc:MGI:2140967]	NA	NA	0	NA	NA	NA	0	NA	NA	0	0	0	NA	1094.56	932.796	1364.15	1289.53	991.895	1032.14	1262.53	1171.26	0.710293	0.0483453	0.110752	-0.119966	0.428401	0.347246	-0.0289755	0.028405	0.319085	0.210821
March3	NA	NA	NA	0	NA	NA	NA	0	NA	NA	0	0	0	NA	109.156	101.627	129.243	120.03	98.375	94.3906	120.297	112.227	0.877982	0.00413612	0.0506311	-0.0524728	0.29432	0.187632	0.0295161	-0.0301326	0.319754	0.219569
Mark4	MAP/microtubule affinity regulating kinase 4 [Source:MGI Symbol;Acc:MGI:1920955]	NA	NA	0	NA	NA	NA	0	NA	NA	0	0	0	NA	1632.74	1549.49	1752.88	1646.95	1573.24	1711.9	1849.92	1874.26	0.871499	0.00480657	0.0372559	-0.0382435	0.139688	0.0497611	-0.0622181	0.0596454	0.171507	0.190364
Mblac2	metallo-beta-lactamase domain containing 2 [Source:MGI Symbol;Acc:MGI:1920102]	NA	NA	0	NA	NA	NA	0	NA	NA	0	0	0	NA	147.35	150.045	162.94	184.231	159.826	176.03	206.75	180.684	0.718635	0.0445967	-0.0131319	0.0130134	0.131958	0.309133	-0.0713407	0.0679785	0.300046	0.105628
Mboat7	membrane bound O-acyltransferase domain containing 7 [Source:MGI Symbol;Acc:MGI:1924832]	NA	NA	0	NA	NA	NA	0	NA	NA	0	0	0	NA	2085.39	1944.42	2115.28	1994.03	2038.77	2041.21	2334.11	2373.68	0.864773	0.005572	0.0496074	-0.0513741	0.0701378	-0.0150243	-0.000862882	0.000862366	0.194313	0.218568
Mccc1os	methylcrotonoyl-Coenzyme A carboxylase 1 (alpha)/ opposite strand [Source:MGI Symbol;Acc:MGI:3590669]	NA	NA	0	NA	NA	NA	0	NA	NA	0	0	0	NA	5.961	6.19613	6.15563	6.35202	5.9935	5.94379	6.21954	6.21974	0.804787	0.0159814	-0.0281772	0.0276374	0.0181756	0.0634847	0.00599576	-0.00602078	0.0594038	0.0594507
Mctp2	multiple C2 domains/ transmembrane 2 [Source:MGI Symbol;Acc:MGI:2685335]	NA	NA	0	NA	NA	NA	0	NA	NA	0	0	0	NA	39.363	32.9652	43.1724	45.713	33.7357	35.0109	39.1121	42.7014	0.744298	0.0341912	0.122281	-0.133614	0.255551	0.338045	-0.0270122	0.0265157	0.186326	0.312994
Me3	malic enzyme 3/ NADP(+)-dependent/ mitochondrial [Source:MGI Symbol;Acc:MGI:1916679]	NA	NA	0	NA	NA	NA	0	NA	NA	0	0	0	NA	93.7561	94.0899	98.9892	95.7471	79.1909	81.8261	94.7224	101.029	0.917889	0.0013002	-0.0025665	0.00256194	0.0757929	0.0277502	-0.0238067	0.0234202	0.234564	0.327554
Mecp2	methyl CpG binding protein 2 [Source:MGI Symbol;Acc:MGI:99918]	NA	NA	0	NA	NA	NA	0	NA	NA	0	0	1	DM_r	2235.64	2184.77	2229.79	2295.46	2282.41	2198.63	2349.32	2337.33	0.816662	0.0133656	0.0165103	-0.0167014	0.0127253	0.0546057	0.0267243	-0.0272287	0.0684073	0.0610262
Med12l	mediator complex subunit 12-like [Source:MGI Symbol;Acc:MGI:2139916]	NA	NA	0	NA	NA	NA	0	NA	NA	0	0	0	NA	88.3927	78.0635	114.367	111.06	82.8793	67.6017	110.635	87.9985	0.754846	0.030394	0.0868564	-0.0924224	0.458522	0.416196	0.139502	-0.15445	0.556231	0.22597
Mettl6	methyltransferase like 6 [Source:MGI Symbol;Acc:MGI:1914261]	NA	NA	0	NA	NA	NA	0	NA	NA	0	0	0	NA	1125.03	989.08	1156.74	1155.69	1072.74	1070.38	1209.74	1233.38	0.855618	0.0067332	0.0899132	-0.0958916	0.130015	0.128702	0.00158901	-0.00159077	0.174986	0.202909
Mfsd12	major facilitator superfamily domain containing 12 [Source:MGI Symbol;Acc:MGI:3604804]	NA	NA	0	NA	NA	NA	0	NA	NA	0	0	0	NA	192.879	189.155	214.523	261.795	181.177	190.515	242.517	228.917	0.842296	0.00868223	0.0139967	-0.0141338	0.167432	0.454734	-0.0367088	0.0357979	0.383983	0.300721
Mfsd8	major facilitator superfamily domain containing 8 [Source:MGI Symbol;Acc:MGI:1919425]	NA	NA	0	NA	NA	NA	0	NA	NA	0	0	0	NA	384.352	332.598	374.666	350.004	340.323	331.803	409.898	387.444	0.77603	0.0235805	0.100557	-0.108094	0.0637311	-0.0345025	0.0181728	-0.0184047	0.286534	0.205257
Mfsd9	major facilitator superfamily domain containing 9 [Source:MGI Symbol;Acc:MGI:2443548]	NA	NA	0	NA	NA	NA	0	NA	NA	0	0	0	NA	162.919	136.741	148.959	171.898	147.647	136.211	164.291	169.849	0.741823	0.0351217	0.120828	-0.13188	-0.00840742	0.19823	0.0569821	-0.0593256	0.211085	0.259086
Mgam	maltase-glucoamylase [Source:MGI Symbol;Acc:MGI:1203495]	NA	NA	0	NA	NA	NA	0	NA	NA	0	0	0	NA	22.862	22.7577	28.6446	30.2756	21.62	23.0298	28.2297	24.7836	0.710446	0.0482747	0.00329462	-0.00330216	0.328602	0.408495	-0.0462895	0.0448504	0.338562	0.150733
Mgat4a	mannoside acetylglucosaminyltransferase 4/ isoenzyme A [Source:MGI Symbol;Acc:MGI:2662992]	NA	NA	0	NA	NA	NA	0	NA	NA	0	0	0	NA	166.264	184.481	197.684	184.511	134.017	159.875	188.608	201.098	0.881579	0.00379169	-0.076943	0.0730464	0.172776	0.0732842	-0.132868	0.121657	0.360107	0.452612
Mgea5	NA	NA	NA	0	NA	NA	NA	0	NA	NA	0	0	0	NA	5393.13	5717.45	6175.54	5751.52	6044.66	5352.78	6570.24	7108.41	0.861708	0.00594513	-0.0427389	0.0415092	0.152703	0.0500814	0.0850231	-0.0903493	0.205309	0.31889
Mgp	matrix Gla protein [Source:MGI Symbol;Acc:MGI:96976]	NA	NA	0	NA	NA	NA	0	NA	NA	0	0	0	NA	4484.71	6416.6	7365.47	8447.75	6210.54	5118.56	6921.88	16230.6	0.745701	0.0336701	-0.281416	0.23538	0.434349	0.632137	0.132757	-0.146223	0.289202	1.51868
Miat	myocardial infarction associated transcript (non-protein coding) [Source:MGI Symbol;Acc:MGI:2444886]	NA	NA	0	NA	NA	NA	0	NA	NA	0	0	0	NA	14.3096	13.1576	13.6603	14.5977	13.071	13.9325	17.5559	15.6754	0.834614	0.00995291	0.0592722	-0.0618121	-0.00771873	0.0880249	-0.0467775	0.0453083	0.378808	0.215352
Micalcl	NA	NA	NA	0	NA	NA	NA	0	NA	NA	0	0	0	NA	61.9698	56.3782	74.0628	53.6473	54.2577	54.1077	71.0663	76.7854	0.789739	0.0197285	0.0666018	-0.0698259	0.323786	-0.141457	0.00199608	-0.00199885	0.391333	0.503
Mief2	mitochondrial elongation factor 2 [Source:MGI Symbol;Acc:MGI:2144199]	NA	NA	0	NA	NA	NA	0	NA	NA	0	0	0	NA	433.379	419.126	423.203	437.135	428.496	368.382	474.711	468.836	0.78755	0.020315	0.0239215	-0.0243249	-0.0103573	0.0363695	0.104923	-0.113156	0.25269	0.234722
Mien1	migration and invasion enhancer 1 [Source:MGI Symbol;Acc:MGI:1913678]	NA	NA	0	NA	NA	NA	0	NA	NA	0	0	0	NA	554.816	532.715	627.313	571.844	473.85	536.887	606.035	661.546	0.894935	0.00267573	0.0290239	-0.0296198	0.206201	0.0726364	-0.0929056	0.087283	0.262064	0.388506
Mink1	misshapen-like kinase 1 (zebrafish) [Source:MGI Symbol;Acc:MGI:1355329]	NA	NA	0	NA	NA	NA	0	NA	NA	0	0	0	NA	2267.94	2193.4	2596.41	2319.95	2410.47	2340.21	2808.32	2743.28	0.901008	0.00224865	0.0239082	-0.0243111	0.219042	0.0566163	0.0211801	-0.0214956	0.241571	0.207765
Mir10a	microRNA 10a [Source:MGI Symbol;Acc:MGI:3619064]	NA	NA	0	NA	NA	NA	0	NA	NA	0	0	0	NA	5.10664	5.22646	5.22309	5.33236	5.25572	5.31089	5.57654	5.41704	0.832957	0.0102416	-0.0168267	0.0166327	0.0157025	0.0455742	-0.00755218	0.00751285	0.0779299	0.0360632
Mir181a-1	microRNA 181a-1 [Source:MGI Symbol;Acc:MGI:3629589]	NA	NA	0	NA	NA	NA	0	NA	NA	0	0	0	NA	1.77368	1.77876	1.79525	1.81416	1.77065	1.78698	1.84324	1.8147	0.909092	0.00175252	-0.00206361	0.00206067	0.0153694	0.0304897	-0.00663499	0.00660461	0.0513273	0.0288141
Mir1969	microRNA 1969 [Source:MGI Symbol;Acc:MGI:3837216]	NA	NA	0	NA	NA	NA	0	NA	NA	0	0	0	NA	1.64496	1.64991	1.6538	1.64272	1.65363	1.65745	1.70962	1.70965	0.869083	0.00507316	-0.00217121	0.00216794	0.00556007	-0.00413673	-0.00166136	0.00165945	0.0463699	0.0463988
Mir29b-1	microRNA 29b-1 [Source:MGI Symbol;Acc:MGI:2676905]	NA	NA	0	NA	NA	NA	0	NA	NA	0	0	0	NA	1.69377	1.68821	1.68734	1.69172	1.67555	1.67946	1.69206	1.69208	0.785484	0.0208784	0.00236927	-0.00237316	-0.00312271	0.000622919	-0.0016825	0.00168054	0.0124661	0.0124789
Mir425	microRNA 425 [Source:MGI Symbol;Acc:MGI:3619401]	NA	NA	0	NA	NA	NA	0	NA	NA	0	0	0	NA	5.05673	5.06274	5.0453	5.1169	5.04305	5.0103	5.2374	5.08024	0.733054	0.0385438	-0.000856878	0.000856369	-0.00412123	0.0162079	0.00469164	-0.00470694	0.0592469	0.0152919
Mir6360	microRNA 6360 [Source:MGI Symbol;Acc:MGI:5530678]	NA	NA	0	NA	NA	NA	0	NA	NA	0	0	0	NA	1.3602	1.36473	1.37719	1.35868	1.37695	1.35881	1.39194	1.4029	0.815719	0.0135625	-0.00240301	0.00239901	0.0155112	-0.00401418	0.00953408	-0.0095975	0.0251595	0.0364694
Mir7036	microRNA 7036 [Source:MGI Symbol;Acc:MGI:5531355]	NA	NA	0	NA	NA	NA	0	NA	NA	0	0	0	NA	3.06635	3.06634	3.0717	3.05924	3.02942	3.03735	3.25356	3.10934	0.758827	0.0290317	2.26134e-06	-2.26135e-06	0.00251877	-0.00334677	-0.00188567	0.0018832	0.101092	0.0356819
Mir7061	microRNA 7061 [Source:MGI Symbol;Acc:MGI:5562779]	NA	NA	0	NA	NA	NA	0	NA	NA	0	0	0	NA	1.52208	1.5194	1.54091	1.52017	1.55093	1.53376	1.56976	1.55751	0.76037	0.0285142	0.00127235	-0.00127347	0.019009	-0.000539327	0.00801107	-0.00805581	0.0254168	0.0141172
Mitf	melanogenesis associated transcription factor [Source:MGI Symbol;Acc:MGI:104554]	NA	NA	0	melanoma	oncogene	A	1	NA	NA	0	1	0	NA	349.243	290.583	415.145	426.632	395.389	293.336	487.253	482.883	0.839812	0.00908108	0.126552	-0.138729	0.375935	0.415313	0.199344	-0.231373	0.500743	0.487745
Mkks	McKusick-Kaufman syndrome [Source:MGI Symbol;Acc:MGI:1891836]	NA	NA	0	NA	NA	NA	0	NA	NA	0	0	0	NA	602.901	624.508	688.192	714.297	579.828	632.673	665.148	737.67	0.823393	0.0120113	-0.0256224	0.0251753	0.165267	0.218979	-0.0642887	0.0615457	0.133762	0.283061
Mkrn1	makorin/ ring finger protein/ 1 [Source:MGI Symbol;Acc:MGI:1859353]	NA	NA	0	NA	NA	NA	0	NA	NA	0	0	0	NA	771.929	843.016	912.146	1121.87	836.247	806.38	1023.28	1168.34	0.858513	0.00635083	-0.064945	0.0621469	0.175852	0.474415	0.0259961	-0.0264732	0.317198	0.508453
Mllt4	NA	NA	NA	0	NA	NA	NA	0	NA	NA	0	0	0	NA	4244.9	4051.9	4496.31	4091.09	4116.6	4090.65	4871.08	4494.35	0.823012	0.0120855	0.0331744	-0.0339552	0.116187	-0.0200698	0.00455524	-0.00456967	0.247344	0.131213
Mmaa	methylmalonic aciduria (cobalamin deficiency) type A [Source:MGI Symbol;Acc:MGI:1923805]	NA	NA	0	NA	NA	NA	0	NA	NA	0	0	0	NA	205.234	211.97	234.725	261.682	229.509	197.113	247.002	247.077	0.734701	0.0378859	-0.0234832	0.023107	0.170221	0.327059	0.105593	-0.113937	0.211564	0.212005
Mndal	myeloid nuclear differentiation antigen like [Source:MGI Symbol;Acc:MGI:3780953]	NA	NA	0	NA	NA	NA	0	NA	NA	0	0	0	NA	66.4731	70.7259	119.735	214.001	72.7957	75.521	149.575	121.84	0.718654	0.0445881	-0.0454275	0.0440406	0.803572	1.64135	-0.0267569	0.0262696	1.01219	0.716312
Mob3b	MOB kinase activator 3B [Source:MGI Symbol;Acc:MGI:2664539]	NA	NA	0	NA	NA	NA	0	NA	NA	0	0	0	NA	52.5959	49.6835	52.2656	51.8717	43.0855	40.72	48.7515	44.7497	0.787902	0.02022	0.0405073	-0.0416776	0.0314188	0.0205049	0.0401577	-0.0413076	0.218403	0.0948338
Mocos	molybdenum cofactor sulfurase [Source:MGI Symbol;Acc:MGI:1915841]	NA	NA	0	NA	NA	NA	0	NA	NA	0	0	0	NA	123.019	116.463	141.402	186.969	107.556	149.678	174.854	192.084	0.787182	0.0204145	0.0389601	-0.0400415	0.23989	0.642881	-0.257987	0.218776	0.443072	0.578657
Mon1a	MON1 homolog A/ secretory traffciking associated [Source:MGI Symbol;Acc:MGI:1920075]	NA	NA	0	NA	NA	NA	0	NA	NA	0	0	0	NA	303.65	308.296	341.947	313.897	282.55	308.709	346.204	350.268	0.904339	0.0020345	-0.0109941	0.0109109	0.160368	0.0368877	-0.0652849	0.0624581	0.22783	0.244666
Mon1b	MON1 homolog B/ secretory traffciking associated [Source:MGI Symbol;Acc:MGI:1923231]	NA	NA	0	NA	NA	NA	0	NA	NA	0	0	0	NA	807.281	714.14	805.331	841.803	700.999	737.342	827.072	920.033	0.871748	0.00477961	0.0857235	-0.0911407	0.0822343	0.146135	-0.0369216	0.0360002	0.20168	0.355353
Morc3	microrchidia 3 [Source:MGI Symbol;Acc:MGI:2136841]	NA	NA	0	NA	NA	NA	0	NA	NA	0	0	0	NA	1890.95	1928.54	2156.94	1947.3	1938.68	1930.1	2110.81	2241.74	0.851587	0.0072898	-0.0142671	0.0141274	0.175602	0.0280911	0.00319529	-0.00320238	0.125919	0.21274
Morn1	MORN repeat containing 1 [Source:MGI Symbol;Acc:MGI:1924116]	NA	NA	0	NA	NA	NA	0	NA	NA	0	0	0	NA	48.0579	46.5156	56.7741	51.0119	51.6468	48.6559	59.4149	53.6577	0.733854	0.0382234	0.0233377	-0.0237215	0.263798	0.1094	0.0423907	-0.043674	0.244536	0.0974974
Morn5	MORN repeat containing 5 [Source:MGI Symbol;Acc:MGI:1922745]	NA	NA	0	NA	NA	NA	0	NA	NA	0	0	0	NA	1.58165	1.57873	1.57926	1.63074	1.57924	1.57975	1.66921	1.60565	0.757531	0.029471	0.00133351	-0.00133474	-0.00085295	0.0454237	-0.000236505	0.000236466	0.0797059	0.0236971
Mospd4	motile sperm domain containing 4 [Source:MGI Symbol;Acc:MGI:1919326]	NA	NA	0	NA	NA	NA	0	NA	NA	0	0	0	NA	7.31573	7.09632	7.94532	7.61528	7.18337	7.17342	7.95297	7.56602	0.822817	0.0121237	0.0217982	-0.0221326	0.140902	0.0796944	0.00100043	-0.00100112	0.147833	0.075874
Mrap	melanocortin 2 receptor accessory protein [Source:MGI Symbol;Acc:MGI:1924287]	NA	NA	0	NA	NA	NA	0	NA	NA	0	0	0	NA	1.55108	1.56348	1.59131	1.54911	1.54879	1.54928	1.61189	1.58706	0.825297	0.0116447	-0.00575537	0.0057325	0.0311799	-0.0075923	-0.000228663	0.000228627	0.0573801	0.0349879
Mreg	melanoregulin [Source:MGI Symbol;Acc:MGI:2151839]	NA	NA	0	NA	NA	NA	0	NA	NA	0	0	0	NA	51.3889	40.5297	63.0264	55.1714	44.8871	51.1762	62.7286	62.4775	0.798462	0.0174964	0.161099	-0.181377	0.455599	0.263562	-0.0976848	0.0914879	0.385139	0.379353
Msi2	musashi RNA-binding protein 2 [Source:MGI Symbol;Acc:MGI:1923876]	NA	NA	0	CML	oncogene_fusion	T	1	NB	ambiguous	1	1	0	NA	3210.75	2968.27	3541	2884.46	2806.16	3055.61	3518.9	3992.9	0.779812	0.022475	0.0555333	-0.0577568	0.196777	-0.0990795	-0.0627394	0.0601243	0.263787	0.446102
Mst1r	macrophage stimulating 1 receptor (c-met-related tyrosine kinase) [Source:MGI Symbol;Acc:MGI:99614]	NA	NA	0	NA	NA	NA	0	NA	NA	0	0	0	NA	19.0809	19.6255	23.1399	24.4171	20.4698	18.8326	26.3806	21.1496	0.737345	0.0368449	-0.020442	0.0201564	0.257814	0.33532	0.0588776	-0.0613831	0.424857	0.106014
Mtf1	metal response element binding transcription factor 1 [Source:MGI Symbol;Acc:MGI:101786]	NA	NA	0	NA	NA	NA	0	NA	NA	0	0	0	NA	1076.33	1059.36	1112.93	1200.36	1055.42	1175.9	1197.74	1439.74	0.766521	0.0265074	0.0114122	-0.0115032	0.0596556	0.168767	-0.080083	0.0758705	0.102422	0.36791
Mtfr1l	mitochondrial fission regulator 1-like [Source:MGI Symbol;Acc:MGI:1924074]	NA	NA	0	NA	NA	NA	0	NA	NA	0	0	0	NA	1837.44	1925.66	2131.29	2166.78	1836.35	2015.1	2184.26	2372.89	0.880076	0.00393329	-0.0342243	0.0334312	0.179808	0.203631	-0.06856	0.0654491	0.181742	0.301239
Mthfs	5/ 10-methenyltetrahydrofolate synthetase [Source:MGI Symbol;Acc:MGI:1340032]	NA	NA	0	NA	NA	NA	0	NA	NA	0	0	0	NA	136.111	126.87	135.62	132.382	121.977	120.661	139.173	126.506	0.738062	0.0365657	0.0498217	-0.0516039	0.0446167	0.00974874	0.0078028	-0.00784523	0.198071	0.0603997
Mtor	mechanistic target of rapamycin kinase [Source:MGI Symbol;Acc:MGI:1928394]	PANCAN_KIRC	oncogene	1	endometrialcarcinoma_headandneck_clearcellrenalcellcarcinoma_anaplasticthyroidcancer_urothelialcellcarcinoma_centralnervoussystemtumours_testiculargermcelltumoursandothertumourtypes	oncogene	Mis_N	1	AML_ANGS_BRCA_COREAD_HC_LGG_OS_PAIS_RCCC_RCH_UCEC	Act	1	1	0	NA	2722.7	2652.6	2849.85	2775.11	2522.87	2704.95	2747.44	2801.54	0.772099	0.0247647	0.018694	-0.0189394	0.0845411	0.0462002	-0.0511453	0.0493941	0.0718765	0.100012
Mturn	maturin/ neural progenitor differentiation regulator homolog (Xenopus) [Source:MGI Symbol;Acc:MGI:1915485]	NA	NA	0	NA	NA	NA	0	NA	NA	0	0	0	NA	239.699	274.576	288.465	357.427	243.349	252.774	304.034	360.285	0.832294	0.0103585	-0.101317	0.0946664	0.165858	0.475111	-0.0276707	0.0271499	0.293533	0.538437
Mtus2	microtubule associated tumor suppressor candidate 2 [Source:MGI Symbol;Acc:MGI:1915388]	NA	NA	0	NA	NA	NA	0	NA	NA	0	0	0	NA	164.137	191.761	219.715	224.139	172.623	141.612	197.962	204.974	0.82647	0.0114224	-0.116561	0.107843	0.304172	0.332932	0.13578	-0.149899	0.333378	0.383592
Mul1	mitochondrial ubiquitin ligase activator of NFKB 1 [Source:MGI Symbol;Acc:MGI:1915600]	NA	NA	0	NA	NA	NA	0	NA	NA	0	0	0	NA	641.18	584.338	633.849	684.347	560.354	582.349	598.081	727.691	0.716506	0.0455359	0.0654096	-0.0685165	0.0488184	0.159407	-0.02804	0.0275054	0.0659633	0.348949
Mxd1	MAX dimerization protein 1 [Source:MGI Symbol;Acc:MGI:96908]	NA	NA	0	NA	NA	NA	0	NA	NA	0	0	0	NA	487.808	431.305	466.638	484.63	450.116	437.741	580.654	492.418	0.781901	0.0218786	0.0860706	-0.0915332	0.0220609	0.0766421	0.0199696	-0.0202499	0.38735	0.149556
Mxi1	MAX interactor 1/ dimerization protein [Source:MGI Symbol;Acc:MGI:97245]	NA	NA	0	NA	NA	NA	0	NA	NA	0	0	0	NA	688.461	626.556	711.023	709.209	685.26	645.798	831.179	986.013	0.895998	0.00259752	0.0663659	-0.0695666	0.112886	0.109202	0.0421509	-0.0434195	0.320657	0.567105
Myo10	myosin X [Source:MGI Symbol;Acc:MGI:107716]	NA	NA	0	NA	NA	NA	0	NA	NA	0	0	0	NA	8062.76	7975.26	9038.6	8959.23	7811.93	9805.73	9760.14	13181.9	0.745072	0.0339031	0.00785013	-0.00789308	0.172675	0.15995	-0.173271	0.154675	0.147952	0.581539
Myrf	myelin regulatory factor [Source:MGI Symbol;Acc:MGI:2684944]	NA	NA	0	NA	NA	NA	0	NA	NA	0	0	0	NA	255.474	224.776	302.474	321.681	152.531	203.424	243.191	252.549	0.850064	0.00750757	0.0893895	-0.095296	0.333025	0.421843	-0.222592	0.192795	0.450393	0.504868
Naa60	N(alpha)-acetyltransferase 60/ NatF catalytic subunit [Source:MGI Symbol;Acc:MGI:1922013]	NA	NA	0	NA	NA	NA	0	NA	NA	0	0	0	NA	1209.09	1229.9	1280.63	1400.02	1204.4	1216.14	1367.2	1264.57	0.716149	0.0456949	-0.0123596	0.0122546	0.0705694	0.199157	-0.00701145	0.00697754	0.175894	0.0633194
Nabp2	nucleic acid binding protein 2 [Source:MGI Symbol;Acc:MGI:1917167]	NA	NA	0	NA	NA	NA	0	NA	NA	0	0	0	NA	657.278	669.951	637.042	725.501	609.515	684.191	738.783	827.676	0.774684	0.0239821	-0.0138423	0.0137108	-0.0589559	0.128631	-0.0857769	0.0809619	0.191714	0.355628
Naglu	alpha-N-acetylglucosaminidase (Sanfilippo disease IIIB) [Source:MGI Symbol;Acc:MGI:1351641]	NA	NA	0	NA	NA	NA	0	NA	NA	0	0	0	NA	614.838	647.891	955.777	906.427	695.308	548.881	884.216	890.336	0.832099	0.0103931	-0.0382672	0.0372784	0.598201	0.521718	0.160519	-0.180641	0.507265	0.517216
Nagpa	N-acetylglucosamine-1-phosphodiester alpha-N-acetylglucosaminidase [Source:MGI Symbol;Acc:MGI:1351598]	NA	NA	0	NA	NA	NA	0	NA	NA	0	0	0	NA	302.148	336.411	391.845	393.565	366.885	342.39	456.778	406.777	0.815034	0.0137067	-0.0795644	0.0754049	0.295462	0.30178	0.0489819	-0.0507035	0.365149	0.197894
Nat6	NA	NA	NA	0	NA	NA	NA	0	NA	NA	0	0	0	NA	603.117	513.902	861.459	717.721	522.901	477.461	812.972	665.471	0.855849	0.00670223	0.110856	-0.120088	0.6252	0.361841	0.0640874	-0.0670672	0.700756	0.411928
Nbr1	NBR1/ autophagy cargo receptor [Source:MGI Symbol;Acc:MGI:108498]	NA	NA	0	NA	NA	NA	0	NA	NA	0	0	0	NA	4357.19	4033.71	4978.5	5178.85	4470.27	4146.99	5061.1	4787.48	0.723352	0.0425573	0.0545719	-0.0567175	0.246886	0.303807	0.0531327	-0.0551646	0.232224	0.152038
Ncoa4	nuclear receptor coactivator 4 [Source:MGI Symbol;Acc:MGI:1350932]	NA	NA	0	papillarythyroid	TSG_fusion	T	1	NA	NA	0	1	0	NA	2867.42	2886.84	3041.81	3134.6	2724.42	2926.79	3024.23	3320.22	0.843789	0.00844808	-0.00487836	0.00486192	0.0802991	0.123649	-0.052612	0.0507607	0.0980108	0.23272
Ndor1	NADPH dependent diflavin oxidoreductase 1 [Source:MGI Symbol;Acc:MGI:1926047]	NA	NA	0	NA	NA	NA	0	NA	NA	0	0	0	NA	632.686	607.482	701.701	639.678	671.959	561.293	769.97	688.734	0.763919	0.0273452	0.0290254	-0.0296213	0.178393	0.0448826	0.123978	-0.135642	0.320407	0.159552
Ndrg1	N-myc downstream regulated gene 1 [Source:MGI Symbol;Acc:MGI:1341799]	NA	NA	0	prostate	TSG_fusion	T	1	NA	NA	0	1	0	NA	609.395	624.406	786.478	808.697	644.919	497.298	785.522	1251.78	0.863411	0.0057359	-0.0176605	0.0174469	0.35037	0.390562	0.175353	-0.199654	0.459886	1.13214
Ndrg3	N-myc downstream regulated gene 3 [Source:MGI Symbol;Acc:MGI:1352499]	NA	NA	0	NA	NA	NA	0	NA	NA	0	0	0	NA	1451.07	1308.18	1614.9	1775.47	1318.1	1401.19	1638.72	1542.08	0.739268	0.0360989	0.0728416	-0.0767159	0.227169	0.363925	-0.0447694	0.0434218	0.269344	0.181654
Ndufa4l2	Ndufa4/ mitochondrial complex associated like 2 [Source:MGI Symbol;Acc:MGI:3039567]	NA	NA	0	NA	NA	NA	0	NA	NA	0	0	0	NA	20.4483	20.6802	24.696	26.2191	21.2073	20.1489	28.9245	25.9965	0.938009	0.000568204	-0.00815835	0.00811248	0.264138	0.35048	0.036456	-0.0374012	0.484187	0.330212
Ndufa7	NADH:ubiquinone oxidoreductase subunit A7 [Source:MGI Symbol;Acc:MGI:1913666]	NA	NA	0	NA	NA	NA	0	NA	NA	0	0	0	NA	1429.65	1699.93	1780.12	1658.24	1570.29	1515.95	1688.69	1892.13	0.748136	0.0327776	-0.130307	0.119506	0.186008	0.0836893	0.025181	-0.0256283	0.130056	0.294162
Negr1	neuronal growth regulator 1 [Source:MGI Symbol;Acc:MGI:2444846]	NA	NA	0	NA	NA	NA	0	NA	NA	0	0	0	NA	238.693	195.17	220.051	240.086	297.446	219.648	349.998	329.896	0.74338	0.0345346	0.137916	-0.152507	0.0205943	0.146308	0.202201	-0.235233	0.436924	0.351589
Nell1	NEL-like 1 [Source:MGI Symbol;Acc:MGI:2443902]	NA	NA	0	NA	NA	NA	0	NA	NA	0	0	0	NA	7.35325	7.47279	7.76688	8.14625	7.6596	7.44388	8.50081	7.97991	0.842216	0.008695	-0.0116798	0.011586	0.0672748	0.136076	0.0204593	-0.0207536	0.170791	0.079563
Nell2	NEL-like 2 [Source:MGI Symbol;Acc:MGI:1858510]	NA	NA	0	NA	NA	NA	0	NA	NA	0	0	0	NA	237.975	192.58	489.582	451.839	230.809	161.573	402.437	446.833	0.867778	0.0052211	0.144611	-0.160738	1.18535	1.06961	0.234441	-0.280074	1.0365	1.18748
Nf1	neurofibromin 1 [Source:MGI Symbol;Acc:MGI:97306]	LUSC_BRCA_PANCAN_PCPG_SKCM_LUAD_GBM_OV_LGG	tsg	1	neurofibroma_glioma	TSG_fusion	D_Mis_N_F_S_O	1	ACC_ALL_AML_BLCA_BRCA_CH_CM_COREAD_GBM_HC_HNSC_LGG_LUAD_LUSC_NB_NSCLC_OV_PCPG_PIA_RCCC_RHBDS_S_THCA	LoF	1	1	0	NA	7557.6	7245.59	8314.12	7829.76	7738.7	7388.69	8695.54	8312.68	0.881321	0.00381579	0.0300921	-0.0307332	0.167727	0.0811307	0.0330003	-0.0337728	0.201185	0.136223
Nfatc2	nuclear factor of activated T cells/ cytoplasmic/ calcineurin dependent 2 [Source:MGI Symbol;Acc:MGI:102463]	NA	NA	0	Ewingsarcoma	oncogene_fusion	T	1	OS_PAAD	ambiguous	1	1	0	NA	74.2923	68.4259	91.6932	74.1082	100.056	56.2144	110.285	215.095	0.75271	0.0311409	0.0581154	-0.060555	0.361718	0.0545357	0.356761	-0.47503	0.4972	1.46093
Nfatc4	nuclear factor of activated T cells/ cytoplasmic/ calcineurin dependent 4 [Source:MGI Symbol;Acc:MGI:1920431]	NA	NA	0	NA	NA	NA	0	NA	NA	0	0	0	NA	2782.94	2646.37	2818.74	3021.58	3032.05	2482.4	3526.72	3244.44	0.814836	0.0137487	0.0358426	-0.0367559	0.0542837	0.154533	0.137078	-0.151483	0.355111	0.234753
Nfs1	nitrogen fixation gene 1 (S. cerevisiae) [Source:MGI Symbol;Acc:MGI:1316706]	NA	NA	0	NA	NA	NA	0	NA	NA	0	0	0	NA	806.144	867.131	883.263	815.625	780.246	794.458	902.122	885.128	0.815857	0.0135336	-0.0535653	0.0516475	0.07824	-0.0366974	-0.0130796	0.0129621	0.196314	0.168877
Nhlrc1	NHL repeat containing 1 [Source:MGI Symbol;Acc:MGI:2145264]	NA	NA	0	NA	NA	NA	0	NA	NA	0	0	0	NA	54.247	46.5271	56.4438	54.5031	42.6954	47.8269	50.9297	57.3321	0.796575	0.0179649	0.106491	-0.114983	0.163763	0.113285	-0.084194	0.0795503	0.170235	0.34107
Nkain4	Na+/K+ transporting ATPase interacting 4 [Source:MGI Symbol;Acc:MGI:1915372]	NA	NA	0	NA	NA	NA	0	NA	NA	0	0	0	NA	218.128	174.678	263.606	254.408	108.319	141.013	182.322	269.931	0.879014	0.00403534	0.15136	-0.169121	0.424565	0.373325	-0.202781	0.17776	0.548423	1.11453
Nol4l	nucleolar protein 4-like [Source:MGI Symbol;Acc:MGI:1918765]	NA	NA	0	NA	NA	NA	0	NA	NA	0	0	0	NA	626.889	537.097	738.042	725.179	589.24	508.273	746.176	1006.78	0.900525	0.00228086	0.107209	-0.11582	0.342701	0.317335	0.102689	-0.110563	0.44335	0.875515
Nos3	nitric oxide synthase 3/ endothelial cell [Source:MGI Symbol;Acc:MGI:97362]	NA	NA	0	NA	NA	NA	0	NA	NA	0	0	0	NA	2.11786	2.11263	2.1575	2.14858	2.12808	2.11446	2.25075	2.18344	0.912101	0.00158784	0.00178274	-0.00178495	0.0285316	0.0225584	0.00462272	-0.00463758	0.0854776	0.0416723
Npas2	neuronal PAS domain protein 2 [Source:MGI Symbol;Acc:MGI:109232]	NA	NA	0	NA	NA	NA	0	NA	NA	0	0	0	NA	56.942	51.109	68.16	70.8556	64.184	51.7968	91.5916	63.0334	0.707284	0.0497422	0.0758536	-0.0800642	0.335284	0.391242	0.146399	-0.162951	0.659401	0.120302
Nppc	natriuretic peptide type C [Source:MGI Symbol;Acc:MGI:97369]	NA	NA	0	NA	NA	NA	0	NA	NA	0	0	0	NA	16.626	15.5098	16.2634	20.7481	16.1026	15.6033	21.1042	32.664	0.827166	0.0112918	0.0492587	-0.0510002	0.0174461	0.368796	0.0225421	-0.0228999	0.412777	1.04295
Npr1	natriuretic peptide receptor 1 [Source:MGI Symbol;Acc:MGI:97371]	NA	NA	0	NA	NA	NA	0	NA	NA	0	0	0	NA	14.0201	13.6618	14.7778	14.9664	14.8479	13.4372	17.0575	16.3559	0.92354	0.00105439	0.0185554	-0.0187972	0.0944847	0.112782	0.0702187	-0.073812	0.270365	0.209768
Npvf	neuropeptide VF precursor [Source:MGI Symbol;Acc:MGI:1926488]	NA	NA	0	NA	NA	NA	0	NA	NA	0	0	0	NA	2.26353	2.25754	2.29003	2.31436	2.28961	2.27968	2.35157	2.3697	0.967251	8.56682e-05	0.00190858	-0.0019111	0.0187017	0.033946	0.00313114	-0.00313795	0.0416539	0.0527379
Npy6r	neuropeptide Y receptor Y6 [Source:MGI Symbol;Acc:MGI:1098590]	NA	NA	0	NA	NA	NA	0	NA	NA	0	0	0	NA	31.4266	28.7199	38.0604	33.3095	24.477	25.8	29.5904	31.9247	0.850722	0.00741292	0.0635057	-0.0664304	0.339811	0.147452	-0.0384704	0.0374712	0.23523	0.344774
Nr1d1	nuclear receptor subfamily 1/ group D/ member 1 [Source:MGI Symbol;Acc:MGI:2444210]	NA	NA	0	NA	NA	NA	0	NA	NA	0	0	0	NA	1357.48	1255.09	1613.75	1366.52	1383.59	1492.6	1672.97	2033.46	0.830252	0.010724	0.0554646	-0.0576825	0.304946	0.065039	-0.0557395	0.0536659	0.218252	0.499776
Nr1d2	nuclear receptor subfamily 1/ group D/ member 2 [Source:MGI Symbol;Acc:MGI:2449205]	NA	NA	0	NA	NA	NA	0	NA	NA	0	0	0	NA	2058.9	2115.26	2268.35	2014.67	2162.47	2149.12	2471.13	2595.34	0.837973	0.0093837	-0.0196146	0.0193515	0.120155	-0.050939	0.00446021	-0.00447404	0.196954	0.267703
Nr1h2	nuclear receptor subfamily 1/ group H/ member 2 [Source:MGI Symbol;Acc:MGI:1352463]	NA	NA	0	NA	NA	NA	0	NA	NA	0	0	0	NA	1262.46	1297.1	1387.35	1496.32	1366.96	1315.79	1504.09	1556.18	0.872661	0.00468159	-0.0196588	0.0193945	0.116433	0.225516	0.0272571	-0.027782	0.165174	0.214291
Nr4a3	nuclear receptor subfamily 4/ group A/ member 3 [Source:MGI Symbol;Acc:MGI:1352457]	NA	NA	0	extraskeletalmyxoidchondrosarcoma	oncogene_fusion	T	1	NA	NA	0	1	0	NA	173.57	207.695	350.119	230.657	491.686	328.808	636.989	916.229	0.82985	0.010797	-0.135277	0.123673	0.877056	0.274956	0.261245	-0.319248	0.634776	1.15922
Nt5e	5' nucleotidase/ ecto [Source:MGI Symbol;Acc:MGI:99782]	NA	NA	0	NA	NA	NA	0	NA	NA	0	0	0	NA	147.314	170.889	171.219	156.744	183.752	172.384	206.835	223.09	0.792252	0.0190682	-0.111051	0.10311	0.105896	-0.021537	0.0453311	-0.0468018	0.216049	0.3252
Ntng2	netrin G2 [Source:MGI Symbol;Acc:MGI:2159341]	NA	NA	0	NA	NA	NA	0	NA	NA	0	0	0	NA	55.8537	51.6031	66.1331	70.3491	56.5481	55.7185	71.5309	69.8184	0.872282	0.00472218	0.0559687	-0.0582279	0.299689	0.388848	0.0106217	-0.0107005	0.349708	0.314749
Nudt11	nudix (nucleoside diphosphate linked moiety X)-type motif 11 [Source:MGI Symbol;Acc:MGI:1930957]	NA	NA	0	NA	NA	NA	0	NA	NA	0	0	0	NA	39.0574	38.0738	38.1783	40.3645	30.7076	32.5413	33.807	38.4308	0.760136	0.0285924	0.0182809	-0.0185156	-0.0145593	0.0657726	-0.0424464	0.0412332	0.0962819	0.281223
Nudt22	nudix (nucleoside diphosphate linked moiety X)-type motif 22 [Source:MGI Symbol;Acc:MGI:1915573]	NA	NA	0	NA	NA	NA	0	NA	NA	0	0	0	NA	203.903	198.888	232.526	217.95	191.625	184.96	259.141	241.713	0.969512	6.92398e-05	0.0178491	-0.0180727	0.207364	0.113967	0.0253113	-0.0257634	0.460764	0.360319
Ociad2	OCIA domain containing 2 [Source:MGI Symbol;Acc:MGI:1916377]	NA	NA	0	NA	NA	NA	0	NA	NA	0	0	0	NA	214.554	232.632	296.132	267.224	232.05	266.196	276.359	353.064	0.746069	0.0335343	-0.0595368	0.0571769	0.405365	0.257174	-0.102421	0.0956295	0.149687	0.503072
Ogfod1	2-oxoglutarate and iron-dependent oxygenase domain containing 1 [Source:MGI Symbol;Acc:MGI:2442978]	NA	NA	0	NA	NA	NA	0	NA	NA	0	0	0	NA	1109.8	1122.26	1255.35	1157.02	1037.68	1189.97	1183.86	1311.01	0.708992	0.0489463	-0.00807741	0.00803244	0.169716	0.0520402	-0.10216	0.0954018	0.0879731	0.235156
Ogfod2	2-oxoglutarate and iron-dependent oxygenase domain containing 2 [Source:MGI Symbol;Acc:MGI:1913877]	NA	NA	0	NA	NA	NA	0	NA	NA	0	0	0	NA	215.505	192.441	223.492	236.556	198.667	183.715	245.741	218.135	0.858443	0.00635982	0.0793421	-0.0839609	0.131848	0.213804	0.0553372	-0.0575447	0.36212	0.190203
Olfml2b	olfactomedin-like 2B [Source:MGI Symbol;Acc:MGI:2443310]	NA	NA	0	NA	NA	NA	0	NA	NA	0	0	0	NA	2721.87	2500.83	3144.24	3039.25	2950.61	2308.69	3278.69	3210.6	0.795604	0.0182093	0.0598009	-0.0623873	0.267915	0.218917	0.166144	-0.187798	0.318252	0.287972
Opa1	OPA1/ mitochondrial dynamin like GTPase [Source:MGI Symbol;Acc:MGI:1921393]	NA	NA	0	NA	NA	NA	0	NA	NA	0	0	0	NA	3023.8	2889.56	3009.22	2992.79	2888.79	2803.52	2999.79	2942.59	0.762525	0.0278008	0.0323838	-0.0331274	0.0254095	0.0175113	0.0214532	-0.021777	0.0758467	0.0480732
Ormdl3	ORM1-like 3 (S. cerevisiae) [Source:MGI Symbol;Acc:MGI:1913862]	NA	NA	0	NA	NA	NA	0	NA	NA	0	0	0	NA	1589.71	1634.58	1945.18	2185.26	1466.64	1549.67	1739.6	1915.1	0.765639	0.0267895	-0.0202199	0.0199404	0.270926	0.438824	-0.0402693	0.0391757	0.205972	0.344634
Os9	amplified in osteosarcoma [Source:MGI Symbol;Acc:MGI:1924301]	NA	NA	0	NA	NA	NA	0	NA	NA	0	0	0	NA	3530.44	3386.36	4080.75	4559.99	3640.38	3180.77	4478.43	4115.81	0.839539	0.00912558	0.0297444	-0.0303706	0.23873	0.398924	0.0940741	-0.100639	0.392979	0.27116
Osbpl2	oxysterol binding protein-like 2 [Source:MGI Symbol;Acc:MGI:2442832]	NA	NA	0	NA	NA	NA	0	NA	NA	0	0	0	NA	1369.36	1356.41	1378.38	1514.79	1356.87	1388.2	1502.57	1508.72	0.844209	0.0083828	0.0068408	-0.0068734	0.0163095	0.152452	-0.0165556	0.0163677	0.130588	0.136486
Osbpl5	oxysterol binding protein-like 5 [Source:MGI Symbol;Acc:MGI:1930265]	NA	NA	0	NA	NA	NA	0	NA	NA	0	0	0	NA	3776.01	3962.32	4406.12	4080.81	3932.91	4061.32	4391.83	4424.74	0.823726	0.0119467	-0.0351607	0.0343241	0.187486	0.0768317	-0.0233633	0.0229909	0.135864	0.146633
Osbpl6	oxysterol binding protein-like 6 [Source:MGI Symbol;Acc:MGI:2139014]	NA	NA	0	NA	NA	NA	0	NA	NA	0	0	0	NA	397.572	419.006	421.695	408.022	452.181	446.615	492.606	485.01	0.858074	0.00640787	-0.0383739	0.0373796	0.0466085	-0.000942622	0.00890769	-0.00896303	0.132441	0.110022
P2rx4	purinergic receptor P2X/ ligand-gated ion channel 4 [Source:MGI Symbol;Acc:MGI:1338859]	NA	NA	0	NA	NA	NA	0	NA	NA	0	0	0	NA	856.072	819.482	1000.63	968.704	840.506	791.256	1001.77	985.481	0.930993	0.000779606	0.0311666	-0.0318548	0.256276	0.209489	0.0428994	-0.0442142	0.296125	0.272469
P3h2	prolyl 3-hydroxylase 2 [Source:MGI Symbol;Acc:MGI:2146663]	NA	NA	0	NA	NA	NA	0	NA	NA	0	0	0	NA	249.928	213.694	353.51	281.148	199.578	196.189	278.926	256.2	0.810826	0.0146144	0.108563	-0.117402	0.608801	0.278379	0.0123006	-0.0124064	0.495233	0.372621
P4ha2	procollagen-proline/ 2-oxoglutarate 4-dioxygenase (proline 4-hydroxylase)/ alpha II polypeptide [Source:MGI Symbol;Acc:MGI:894286]	NA	NA	0	NA	NA	NA	0	NA	NA	0	0	0	NA	2587.08	2170.23	2429.77	2357.77	1963.07	2106.34	2387.81	2680.47	0.763162	0.027592	0.121177	-0.132297	0.0306767	-0.0127193	-0.051708	0.0499187	0.230871	0.397668
Pacs1	phosphofurin acidic cluster sorting protein 1 [Source:MGI Symbol;Acc:MGI:1277113]	NA	NA	0	NA	NA	NA	0	NA	NA	0	0	0	NA	1234.55	1340.75	1423.96	1475.18	1406.71	1278.16	1463.98	1488.2	0.708529	0.0491613	-0.0607537	0.0582983	0.145165	0.196147	0.0674719	-0.0707829	0.125041	0.148718
Pard6g	par-6 family cell polarity regulator gamma [Source:MGI Symbol;Acc:MGI:2135606]	NA	NA	0	NA	NA	NA	0	NA	NA	0	0	0	NA	1707.86	1516.47	1882.04	1720	1421.32	1750.98	1864.56	1857.6	0.730762	0.0394702	0.0831933	-0.0882859	0.223294	0.0934072	-0.158298	0.142633	0.233305	0.227911
Pcdha12	protocadherin alpha 12 [Source:MGI Symbol;Acc:MGI:1298370]	NA	NA	0	NA	NA	NA	0	NA	NA	0	0	0	NA	24.5639	20.2445	24.712	23.101	19.0458	19.1555	23.0076	22.263	0.799065	0.0173481	0.132772	-0.146241	0.141447	0.0441894	-0.0041493	0.0041374	0.268488	0.221025
Pcdha5	protocadherin alpha 5 [Source:MGI Symbol;Acc:MGI:1298371]	NA	NA	0	NA	NA	NA	0	NA	NA	0	0	0	NA	5.43269	5.32876	5.2638	5.41231	5.22636	5.20649	5.70381	5.54088	0.776804	0.0233515	0.0138655	-0.0140001	-0.0316956	0.00844554	0.00274586	-0.0027511	0.128864	0.0870529
Pcid2	PCI domain containing 2 [Source:MGI Symbol;Acc:MGI:2443003]	NA	NA	0	NA	NA	NA	0	NA	NA	0	0	0	NA	693.742	682.971	740.078	727.687	654.472	647.79	722.55	776.414	0.948609	0.000326373	0.0112438	-0.0113321	0.104521	0.0801632	0.00738391	-0.0074219	0.15015	0.253879
Pcmtd2	protein-L-isoaspartate (D-aspartate) O-methyltransferase domain containing 2 [Source:MGI Symbol;Acc:MGI:1923927]	NA	NA	0	NA	NA	NA	0	NA	NA	0	0	0	NA	902.35	831.983	898.217	1074.9	898.663	731.954	1023.79	994.848	0.784913	0.0210359	0.0573779	-0.0597547	0.0507546	0.309815	0.140434	-0.155593	0.328504	0.28713
Pcolce	procollagen C-endopeptidase enhancer protein [Source:MGI Symbol;Acc:MGI:105099]	NA	NA	0	NA	NA	NA	0	NA	NA	0	0	0	NA	11799.3	11852.2	13791.6	16687	13032.9	10521.1	15972.9	13734.3	0.730242	0.0396823	-0.00323322	0.00322599	0.221858	0.496794	0.146182	-0.162681	0.439649	0.221806
Pcp2	Purkinje cell protein 2 (L7) [Source:MGI Symbol;Acc:MGI:97508]	NA	NA	0	NA	NA	NA	0	NA	NA	0	0	0	NA	1.77701	1.79942	1.78631	1.80318	1.78614	1.77463	1.80354	1.87463	0.724803	0.0419416	-0.00907062	0.00901394	-0.00153632	0.0120235	0.00465257	-0.00466762	0.0186406	0.0744149
Pcsk6	proprotein convertase subtilisin/kexin type 6 [Source:MGI Symbol;Acc:MGI:102897]	NA	NA	0	NA	NA	NA	0	NA	NA	0	0	0	NA	850.654	771.272	972.549	1250.81	526.012	697.167	861.746	998.857	0.850454	0.00745142	0.0689364	-0.0723964	0.262134	0.625157	-0.217468	0.188941	0.494699	0.707716
Pcx	pyruvate carboxylase [Source:MGI Symbol;Acc:MGI:97520]	NA	NA	0	NA	NA	NA	0	NA	NA	0	0	0	NA	805.054	748.793	1564.86	1466.01	880.118	755.57	1399.4	1183.76	0.746015	0.0335543	0.051313	-0.0532055	1.01019	0.916048	0.105872	-0.114261	0.774913	0.533476
Pcyox1	prenylcysteine oxidase 1 [Source:MGI Symbol;Acc:MGI:1914131]	NA	NA	0	NA	NA	NA	0	NA	NA	0	0	0	NA	4875.8	4547.26	5751.07	5751.45	4640.94	4441.04	5318.32	5179.83	0.766955	0.0263689	0.049443	-0.0511978	0.287634	0.287728	0.0314102	-0.0321093	0.227963	0.189897
Pde10a	phosphodiesterase 10A [Source:MGI Symbol;Acc:MGI:1345143]	NA	NA	0	NA	NA	NA	0	NA	NA	0	0	0	NA	818.207	879.1	1061.72	1260.16	1009.01	975.606	1356.95	1218.75	0.789939	0.0196754	-0.0527105	0.0508523	0.32315	0.570357	0.024081	-0.0244898	0.451509	0.296538
Pdk2	pyruvate dehydrogenase kinase/ isoenzyme 2 [Source:MGI Symbol;Acc:MGI:1343087]	NA	NA	0	NA	NA	NA	0	NA	NA	0	0	0	NA	366.264	363.232	435.376	513.967	349.668	320.34	407.447	437.05	0.802092	0.0166164	0.00598338	-0.00600829	0.255363	0.494776	0.061807	-0.0645739	0.282433	0.38362
Pdlim3	PDZ and LIM domain 3 [Source:MGI Symbol;Acc:MGI:1859274]	NA	NA	0	NA	NA	NA	0	NA	NA	0	0	0	NA	21.9224	19.3685	22.2942	24.133	19.3824	19.2021	23.7938	20.4949	0.728718	0.0403075	0.0865822	-0.0921121	0.110845	0.225189	0.00672383	-0.00675531	0.302568	0.0872428
Pdp1	pyruvate dehyrogenase phosphatase catalytic subunit 1 [Source:MGI Symbol;Acc:MGI:2685870]	NA	NA	0	NA	NA	NA	0	NA	NA	0	0	0	NA	730.079	679.549	724.987	986.556	747.206	663.72	880.097	1065.38	0.807638	0.0153264	0.0508103	-0.0526653	0.0407128	0.485157	0.0829362	-0.0879963	0.319092	0.594727
Pdpk1	3-phosphoinositide dependent protein kinase 1 [Source:MGI Symbol;Acc:MGI:1338068]	NA	NA	0	NA	NA	NA	0	NA	NA	0	0	0	NA	3429.77	3515.45	3777.05	3538.21	3575.03	3542.52	3685.31	3939.14	0.759943	0.0286568	-0.0179082	0.0176887	0.121238	0.0270014	0.00657461	-0.0066047	0.050406	0.146499
Pecam1	platelet/endothelial cell adhesion molecule 1 [Source:MGI Symbol;Acc:MGI:97537]	NA	NA	0	NA	NA	NA	0	NA	NA	0	0	0	NA	3.22265	3.30478	3.34501	3.24028	3.27854	3.27149	3.37078	3.37086	0.741556	0.0352232	-0.0182669	0.0180385	0.0354963	-0.0103947	0.00155149	-0.00155316	0.0415793	0.0416142
Pef1	penta-EF hand domain containing 1 [Source:MGI Symbol;Acc:MGI:1915148]	NA	NA	0	NA	NA	NA	0	NA	NA	0	0	0	NA	950.685	1191.94	1123.12	1275.44	956.726	1068.78	1221.7	1302.69	0.789017	0.0199207	-0.172339	0.153931	0.0681345	0.251616	-0.082103	0.0776811	0.270607	0.363209
Peg13	paternally expressed 13 [Source:MGI Symbol;Acc:MGI:2663476]	NA	NA	0	NA	NA	NA	0	NA	NA	0	0	0	NA	1122.47	1038.7	1177.7	1138.95	1020.73	969.178	1135.12	1196.5	0.916794	0.00135178	0.0548624	-0.0570315	0.124165	0.0758865	0.0368997	-0.0378683	0.19015	0.266124
Perp	PERP/ TP53 apoptosis effector [Source:MGI Symbol;Acc:MGI:1929938]	NA	NA	0	NA	NA	NA	0	NA	NA	0	0	0	NA	1951.52	1526.11	3272.03	2180.11	1146.28	1736.86	2620.34	3165.05	0.870861	0.00487612	0.166492	-0.188243	0.912082	0.326295	-0.330679	0.268839	0.862113	1.13459
Pgap3	post-GPI attachment to proteins 3 [Source:MGI Symbol;Acc:MGI:2444461]	NA	NA	0	NA	NA	NA	0	NA	NA	0	0	0	NA	85.9563	88.1944	107.282	113.816	94.233	83.7334	134.839	137.775	0.980628	1.79128e-05	-0.0186611	0.0184228	0.301072	0.386367	0.0826998	-0.0877303	0.599631	0.630708
Phactr1	phosphatase and actin regulator 1 [Source:MGI Symbol;Acc:MGI:2659021]	NA	NA	0	NA	NA	NA	0	NA	NA	0	0	0	NA	116.882	105.153	120.259	203.286	106.14	91.4643	170.726	124.629	0.710731	0.0481436	0.0742639	-0.0782952	0.115355	0.872727	0.103355	-0.111335	0.789069	0.335029
Phlda3	pleckstrin homology like domain/ family A/ member 3 [Source:MGI Symbol;Acc:MGI:1351485]	NA	NA	0	NA	NA	NA	0	NA	NA	0	0	0	NA	5637.25	5613.38	6395.64	6306.67	5090.23	5348.66	5967.89	7070.84	0.899181	0.00237212	0.00305864	-0.00306514	0.185155	0.164944	-0.0361657	0.0352812	0.193325	0.437985
Phyh	phytanoyl-CoA hydroxylase [Source:MGI Symbol;Acc:MGI:891978]	NA	NA	0	NA	NA	NA	0	NA	NA	0	0	0	NA	285.887	270.198	307.355	492.33	298.973	232.879	414.995	355.233	0.73157	0.0391419	0.0401396	-0.0412884	0.144601	0.824321	0.16899	-0.191444	0.642069	0.417739
Pi16	peptidase inhibitor 16 [Source:MGI Symbol;Acc:MGI:1921366]	NA	NA	0	NA	NA	NA	0	NA	NA	0	0	0	NA	51.3312	53.9957	59.7104	77.7454	53.386	42.5869	74.6355	67.9169	0.873175	0.00462704	-0.0369658	0.0360423	0.181179	0.561954	0.153834	-0.172217	0.637234	0.501143
Pi4k2a	phosphatidylinositol 4-kinase type 2 alpha [Source:MGI Symbol;Acc:MGI:1934031]	NA	NA	0	NA	NA	NA	0	NA	NA	0	0	0	NA	1565.84	1557.84	1634.64	1695.4	1602.3	1656.28	1670.07	1860.37	0.738723	0.0363092	0.00368842	-0.00369787	0.0657258	0.118378	-0.0240961	0.0237002	0.0356629	0.19135
Pi4ka	phosphatidylinositol 4-kinase alpha [Source:MGI Symbol;Acc:MGI:2448506]	NA	NA	0	NA	NA	NA	0	NA	NA	0	0	0	NA	3117.7	3025.72	3268.21	3423.56	3263.29	3130.65	3460.05	3371.71	0.735865	0.0374254	0.0214395	-0.0217629	0.0894585	0.156456	0.0296222	-0.0302432	0.114088	0.0767737
Pigs	phosphatidylinositol glycan anchor biosynthesis/ class S [Source:MGI Symbol;Acc:MGI:2687325]	NA	NA	0	NA	NA	NA	0	NA	NA	0	0	0	NA	2372.38	2103.77	2647.12	2712.58	2377.36	2290.99	2611.39	2719.42	0.733871	0.0382165	0.0840768	-0.0892814	0.242167	0.277407	0.0264475	-0.0269414	0.161908	0.220386
Pik3c3	phosphatidylinositol 3-kinase catalytic subunit type 3 [Source:MGI Symbol;Acc:MGI:2445019]	NA	NA	0	NA	NA	NA	0	NA	NA	0	0	0	NA	899.699	823.502	885.425	1024.45	798.228	726.653	911.783	926.248	0.848282	0.00776739	0.0624233	-0.0652469	0.0393505	0.249753	0.066176	-0.069358	0.258066	0.280775
Pik3r2	phosphoinositide-3-kinase regulatory subunit 2 [Source:MGI Symbol;Acc:MGI:1098772]	PANCAN_UCEC	oncogene	1	NA	NA	NA	0	NA	NA	0	1	0	NA	2198.11	2380.64	2633.82	3091.03	2419.87	2104.84	2975.59	2908.62	0.861276	0.005999	-0.0586883	0.0563939	0.202206	0.433135	0.0971048	-0.104115	0.395354	0.362513
Pip4k2c	phosphatidylinositol-5-phosphate 4-kinase/ type II/ gamma [Source:MGI Symbol;Acc:MGI:2152214]	NA	NA	0	NA	NA	NA	0	NA	NA	0	0	0	NA	1172.65	1206.18	1449.49	1399.43	1255.36	1147.47	1326.69	1384.87	0.71456	0.0464049	-0.0204793	0.0201927	0.285293	0.234593	0.0633618	-0.0662729	0.143092	0.205015
Pitpnc1	phosphatidylinositol transfer protein/ cytoplasmic 1 [Source:MGI Symbol;Acc:MGI:1919045]	NA	NA	0	NA	NA	NA	0	NA	NA	0	0	0	NA	1488.76	1348.97	1843.61	1552.87	1442.96	1382.21	1742.82	1948.7	0.882297	0.00372524	0.0693752	-0.0728805	0.377791	0.1302	0.0306926	-0.0313598	0.303083	0.464171
Pitpnm1	phosphatidylinositol transfer protein/ membrane-associated 1 [Source:MGI Symbol;Acc:MGI:1197524]	NA	NA	0	NA	NA	NA	0	NA	NA	0	0	0	NA	834.143	855.874	885.37	782.502	832.453	847.646	1028.87	1162.4	0.78868	0.0200107	-0.0186715	0.0184329	0.0673146	-0.110871	-0.0131049	0.0129869	0.292512	0.468565
Pla1a	phospholipase A1 member A [Source:MGI Symbol;Acc:MGI:1934677]	NA	NA	0	NA	NA	NA	0	NA	NA	0	0	0	NA	61.8106	53.4575	54.2131	62.7515	49.7391	54.7497	64.4441	70.2912	0.780715	0.022216	0.100933	-0.108529	-0.0882818	0.122727	-0.0708961	0.0675747	0.302773	0.428068
Pla2g16	NA	NA	NA	0	NA	NA	NA	0	NA	NA	0	0	0	NA	383.527	402.52	375.787	435.198	362.509	367.726	426.124	440.502	0.820298	0.0126226	-0.0352874	0.0344449	-0.0647003	0.147057	-0.0103442	0.0102706	0.222911	0.270786
Pla2g2e	phospholipase A2/ group IIE [Source:MGI Symbol;Acc:MGI:1349660]	NA	NA	0	NA	NA	NA	0	NA	NA	0	0	0	NA	2.80783	2.76771	2.85143	2.8019	2.77466	2.75713	2.91456	2.89251	0.93039	0.000799844	0.0103435	-0.0104182	0.0325749	0.00729351	0.00456552	-0.00458001	0.0755286	0.0645763
Pla2g3	phospholipase A2/ group III [Source:MGI Symbol;Acc:MGI:2444945]	NA	NA	0	NA	NA	NA	0	NA	NA	0	0	0	NA	2.3408	2.3086	2.36236	2.29895	2.33006	2.31989	2.39364	2.39369	0.769258	0.0256432	0.00995699	-0.0100262	0.0231848	-0.0160685	0.0031493	-0.00315619	0.041992	0.0420216
Pla2g7	phospholipase A2/ group VII (platelet-activating factor acetylhydrolase/ plasma) [Source:MGI Symbol;Acc:MGI:1351327]	NA	NA	0	NA	NA	NA	0	NA	NA	0	0	0	NA	972.104	1410.95	1377.21	1526.64	1356.24	1430.67	1809.95	1715.52	0.715012	0.0462024	-0.293631	0.243857	0.208932	0.357543	-0.0390553	0.0380259	0.377278	0.299979
Pla2r1	phospholipase A2 receptor 1 [Source:MGI Symbol;Acc:MGI:102468]	NA	NA	0	NA	NA	NA	0	NA	NA	0	0	0	NA	852.695	810.502	1148.08	1210.96	1056.08	968.989	1513	1130.01	0.707886	0.0494608	0.0361426	-0.0370714	0.46526	0.542188	0.0607471	-0.0634178	0.579442	0.158361
Plac1	placental specific protein 1 [Source:MGI Symbol;Acc:MGI:1926287]	NA	NA	0	NA	NA	NA	0	NA	NA	0	0	0	NA	2.93823	2.91013	2.94371	3.02484	2.90315	2.91068	3.0265	2.97977	0.854303	0.00691169	0.00691388	-0.00694717	0.00960419	0.048829	-0.0018693	0.00186688	0.058164	0.035715
Plcd4	phospholipase C/ delta 4 [Source:MGI Symbol;Acc:MGI:107469]	NA	NA	0	NA	NA	NA	0	NA	NA	0	0	0	NA	18.3493	15.6594	18.7031	18.626	15.5188	16.4114	17.9459	17.9473	0.757833	0.0293684	0.10982	-0.118874	0.13737	0.131416	-0.0409073	0.0397793	0.168731	0.168848
Pld3	phospholipase D family/ member 3 [Source:MGI Symbol;Acc:MGI:1333782]	NA	NA	0	NA	NA	NA	0	NA	NA	0	0	0	NA	2954.69	2705.46	3774.51	3900.56	3224.02	2753.36	4033.1	3873.44	0.835846	0.00974162	0.062166	-0.0649658	0.415449	0.462841	0.109347	-0.118319	0.432376	0.374101
Plekha6	pleckstrin homology domain containing/ family A member 6 [Source:MGI Symbol;Acc:MGI:2388662]	NA	NA	0	NA	NA	NA	0	NA	NA	0	0	0	NA	118.169	134.061	174.056	203.763	111.038	113.148	193.578	141.376	0.809734	0.014856	-0.0938888	0.0881502	0.464815	0.692148	-0.0136446	0.0135168	0.788216	0.334838
Plekha8	pleckstrin homology domain containing/ family A (phosphoinositide binding specific) member 8 [Source:MGI Symbol;Acc:MGI:2681164]	NA	NA	0	NA	NA	NA	0	NA	NA	0	0	0	NA	707.698	696.863	744.879	748.945	660.957	635.271	665.91	709.656	0.751731	0.0314869	0.011086	-0.0111719	0.084959	0.0928131	0.0283084	-0.028875	0.0390797	0.130872
Plekhg6	pleckstrin homology domain containing/ family G (with RhoGef domain) member 6 [Source:MGI Symbol;Acc:MGI:2682298]	NA	NA	0	NA	NA	NA	0	NA	NA	0	0	0	NA	60.3285	54.3216	76.1225	68.6693	51.4728	51.4244	84.0806	70.2114	0.942825	0.000447463	0.0736738	-0.0776395	0.409157	0.260499	0.000678342	-0.000678661	0.708643	0.448574
Plekhm1	pleckstrin homology domain containing/ family M (with RUN domain) member 1 [Source:MGI Symbol;Acc:MGI:2443207]	NA	NA	0	NA	NA	NA	0	NA	NA	0	0	0	NA	1101.78	1046.24	1189.28	1172.52	1024.9	1041.62	1189.62	1188.71	0.960166	0.000153331	0.036827	-0.0377917	0.147078	0.126609	-0.0117196	0.0116251	0.203298	0.202195
Plekhm2	pleckstrin homology domain containing/ family M (with RUN domain) member 2 [Source:MGI Symbol;Acc:MGI:1916832]	NA	NA	0	NA	NA	NA	0	NA	NA	0	0	0	NA	1057.75	1128.5	1251.07	1183.06	1154.14	1131.95	1241.83	1260.14	0.773635	0.0242977	-0.0474597	0.045948	0.19471	0.114063	0.0139404	-0.0140764	0.119587	0.140706
Pltp	phospholipid transfer protein [Source:MGI Symbol;Acc:MGI:103151]	NA	NA	0	NA	NA	NA	0	NA	NA	0	0	0	NA	651.359	414.644	1891.25	1658.9	822.135	441.223	1863.9	1239.32	0.739226	0.036115	0.289313	-0.362266	1.82713	1.63801	0.380184	-0.517685	1.56106	0.97228
Plxdc1	plexin domain containing 1 [Source:MGI Symbol;Acc:MGI:1919574]	NA	NA	0	NA	NA	NA	0	NA	NA	0	0	0	NA	31.0195	32.9882	39.3895	49.3223	35.5406	31.7036	49.3279	49.7572	0.8962	0.00258283	-0.0450722	0.0437066	0.299564	0.623994	0.0800592	-0.0847642	0.552995	0.565495
Plxdc2	plexin domain containing 2 [Source:MGI Symbol;Acc:MGI:1914698]	NA	NA	0	NA	NA	NA	0	NA	NA	0	0	0	NA	7616.63	6413.63	10534.8	9336.43	7636.95	6580.19	11053.8	8705.43	0.782393	0.0217395	0.118683	-0.129329	0.586622	0.412401	0.103437	-0.11143	0.636914	0.292356
Pnpla2	patatin-like phospholipase domain containing 2 [Source:MGI Symbol;Acc:MGI:1914103]	NA	NA	0	NA	NA	NA	0	NA	NA	0	0	0	NA	624.454	595.648	735.229	679.26	634.676	693.107	739.2	888.277	0.823886	0.0119157	0.0336647	-0.034469	0.269264	0.155034	-0.0649271	0.0621305	0.155018	0.420064
Pnpla8	patatin-like phospholipase domain containing 8 [Source:MGI Symbol;Acc:MGI:1914702]	NA	NA	0	NA	NA	NA	0	NA	NA	0	0	0	NA	2123.04	1965.2	2146.75	2344.2	2282.01	2158.94	2423.04	2578.73	0.801261	0.0168153	0.0546513	-0.0568034	0.0706697	0.197615	0.0394366	-0.0405449	0.125953	0.215795
Polr1e	polymerase (RNA) I polypeptide E [Source:MGI Symbol;Acc:MGI:1929022]	NA	NA	0	NA	NA	NA	0	NA	NA	0	0	0	NA	601.133	529.346	607.035	526.632	493.022	522.409	620.23	585.607	0.717878	0.0449293	0.088821	-0.0946502	0.102918	-0.102068	-0.0423679	0.041159	0.288782	0.205912
Pou3f1	POU domain/ class 3/ transcription factor 1 [Source:MGI Symbol;Acc:MGI:101896]	NA	NA	0	NA	NA	NA	0	NA	NA	0	0	0	NA	3.67368	3.71211	3.73704	3.72226	3.83466	3.72827	3.95748	3.84194	0.751289	0.0316439	-0.0075277	0.00748863	0.0171426	0.0114258	0.0201522	-0.0204377	0.0656364	0.0228911
Ppp1r13b	protein phosphatase 1/ regulatory subunit 13B [Source:MGI Symbol;Acc:MGI:1336199]	NA	NA	0	NA	NA	NA	0	NA	NA	0	0	0	NA	577.885	560.705	615.968	737.539	648.922	575.546	700.357	774.239	0.770285	0.0253234	0.0216052	-0.0219337	0.113679	0.373542	0.0839618	-0.0891518	0.194008	0.338696
Ppp3ca	protein phosphatase 3/ catalytic subunit/ alpha isoform [Source:MGI Symbol;Acc:MGI:107164]	NA	NA	0	NA	NA	NA	0	ST	LoF	1	1	0	NA	4425.84	4118.6	4763.12	5031.96	4256.38	4458.38	4846.66	5295.66	0.844826	0.00828772	0.0509649	-0.0528315	0.15692	0.236132	-0.0338347	0.0330594	0.153529	0.28135
Ppt2	palmitoyl-protein thioesterase 2 [Source:MGI Symbol;Acc:MGI:1860075]	NA	NA	0	NA	NA	NA	0	BLCA	Act	1	1	0	NA	758.18	666.308	730.527	754.815	595.449	567.058	669.667	695.138	0.847812	0.00783695	0.0901692	-0.0961827	0.0365648	0.083752	0.0348111	-0.0356719	0.204276	0.258132
Prdm2	PR domain containing 2/ with ZNF domain [Source:MGI Symbol;Acc:MGI:107628]	NA	NA	0	glioma_colonadenocarcinoma_gastriccarcinoma_ovariancarcinoma_HNSCC	TSG	O_F	1	AN_HC_RPC	ambiguous	1	1	1	HM_w	4248.04	4074.27	4487.11	4257.54	4388.38	4211.31	4648.41	4486.36	0.753942	0.0307089	0.0298124	-0.0304415	0.108805	0.0330359	0.0294041	-0.0300159	0.112452	0.0612607
Prelp	proline arginine-rich end leucine-rich repeat [Source:MGI Symbol;Acc:MGI:2151110]	NA	NA	0	NA	NA	NA	0	NA	NA	0	0	0	NA	2599.68	2181	3172.8	3809.99	1569.27	2148.41	3171.57	4783.68	0.907172	0.00186313	0.121119	-0.132227	0.40854	0.67257	-0.244307	0.208865	0.770797	1.36372
Prg4	proteoglycan 4 (megakaryocyte stimulating factor/ articular superficial zone protein) [Source:MGI Symbol;Acc:MGI:1891344]	NA	NA	0	NA	NA	NA	0	NA	NA	0	0	0	NA	179.015	147.512	235.099	141.76	163.277	143.271	212.353	304.659	0.751443	0.0315893	0.132878	-0.146369	0.526066	-0.203747	0.0912081	-0.0973658	0.470354	0.991084
Prkcd	protein kinase C/ delta [Source:MGI Symbol;Acc:MGI:97598]	NA	NA	0	NA	NA	NA	0	DLBCL_NHLY	LoF	1	1	1		2322.38	2218.14	2282.36	2078.17	2144.62	1901.3	2419.46	2931.05	0.716136	0.0457004	0.0327458	-0.0335063	0.00766649	-0.127547	0.0842525	-0.0894796	0.258219	0.534951
Prkch	protein kinase C/ eta [Source:MGI Symbol;Acc:MGI:97600]	NA	NA	0	NA	NA	NA	0	NA	NA	0	0	0	NA	41.2388	37.0881	40.883	47.2974	32.4136	36.2376	43.4275	37.9371	0.748062	0.0328047	0.0744951	-0.0785522	0.0619926	0.272253	-0.0826868	0.0782034	0.339323	0.144325
Prkcsh	protein kinase C substrate 80K-H [Source:MGI Symbol;Acc:MGI:107877]	NA	NA	0	NA	NA	NA	0	NA	NA	0	0	0	NA	4822.71	4756.31	5023	4876.15	4526.5	4709.64	4869.5	5268.64	0.83917	0.009186	0.00996606	-0.0100354	0.0686694	0.0258637	-0.0288942	0.0283269	0.0764836	0.19014
Prmt10	NA	NA	NA	0	NA	NA	NA	0	NA	NA	0	0	0	NA	585.415	603.362	562.09	629.749	549.115	597.227	662.971	637.733	0.722518	0.0429137	-0.0219468	0.0216179	-0.0806054	0.0833714	-0.0618577	0.0593141	0.209979	0.153985
Prpf18	pre-mRNA processing factor 18 [Source:MGI Symbol;Acc:MGI:1914479]	NA	NA	0	NA	NA	NA	0	NA	NA	0	0	0	NA	1030.52	1005.2	1012	1100.01	995.977	1028.53	1123.18	1100.46	0.844061	0.00840574	0.0178339	-0.0180571	-0.00832796	0.111977	-0.0233883	0.0230152	0.150015	0.120529
Prr18	proline rich 18 [Source:MGI Symbol;Acc:MGI:2443403]	NA	NA	0	NA	NA	NA	0	NA	NA	0	0	0	NA	8.27442	8.50633	8.30443	8.81483	8.58174	8.52577	9.33625	9.01872	0.816271	0.0134469	-0.0200768	0.0198012	-0.0148541	0.0711971	0.00471253	-0.00472797	0.126286	0.0763645
Prss12	protease/ serine 12 neurotrypsin (motopsin) [Source:MGI Symbol;Acc:MGI:1100881]	NA	NA	0	NA	NA	NA	0	NA	NA	0	0	0	NA	100.897	107.244	153.427	119.539	85.5914	96.8097	120.595	128.906	0.848125	0.00779067	-0.0446755	0.0433335	0.559995	0.199926	-0.0915769	0.0861093	0.403058	0.49921
Prss36	protease/ serine 36 [Source:MGI Symbol;Acc:MGI:1924863]	NA	NA	0	NA	NA	NA	0	NA	NA	0	0	0	NA	75.6604	70.8909	76.2471	81.7692	75.3268	68.901	87.0261	83.1562	0.891162	0.00296576	0.0462049	-0.0477338	0.0573485	0.158223	0.0628865	-0.0657531	0.271171	0.205546
Prss57	protease/ serine 57 [Source:MGI Symbol;Acc:MGI:1920356]	NA	NA	0	NA	NA	NA	0	NA	NA	0	0	0	NA	2.3839	2.38903	2.41157	2.43727	2.3784	2.44256	2.53333	2.43801	0.727782	0.0406947	-0.00155101	0.00154934	0.0150978	0.0303879	-0.019331	0.0190754	0.0717163	0.0163846
Prune	NA	NA	NA	0	NA	NA	NA	0	NA	NA	0	0	0	NA	866.448	866.316	934.273	936.868	865.108	806.629	988.284	1162.78	0.89867	0.0024074	0.000110123	-0.000110131	0.108841	0.112843	0.0496047	-0.0513712	0.24165	0.476234
Psap	prosaposin [Source:MGI Symbol;Acc:MGI:97783]	NA	NA	0	NA	NA	NA	0	NA	NA	0	0	0	NA	18723.4	18440.3	25127.1	24991.6	21910.1	17767.7	24979.3	23763.6	0.710913	0.0480604	0.0109483	-0.011032	0.435347	0.427548	0.143265	-0.159076	0.332405	0.260423
Psen2	presenilin 2 [Source:MGI Symbol;Acc:MGI:109284]	NA	NA	0	NA	NA	NA	0	NA	NA	0	0	0	NA	374.509	367.48	399.932	427.675	376.928	372.785	445.224	406.495	0.849641	0.00756865	0.013603	-0.0137325	0.108359	0.20512	0.0079496	-0.00799365	0.248193	0.116901
Ptdss1	phosphatidylserine synthase 1 [Source:MGI Symbol;Acc:MGI:1276575]	NA	NA	0	NA	NA	NA	0	NA	NA	0	0	0	NA	1684.41	1703.15	1846.34	1747.28	1696.02	1652.79	1748.57	1940.17	0.796823	0.0179029	-0.00800526	0.00796109	0.124417	0.0448589	0.0185064	-0.0187469	0.0625258	0.212529
Ptges	prostaglandin E synthase [Source:MGI Symbol;Acc:MGI:1927593]	NA	NA	0	NA	NA	NA	0	NA	NA	0	0	0	NA	883.174	737.852	1091.49	1229.16	733.3	818.411	1118.24	1266.86	0.899963	0.00231874	0.123863	-0.135504	0.42939	0.60076	-0.0813839	0.0770371	0.527375	0.707402
Ptges2	prostaglandin E synthase 2 [Source:MGI Symbol;Acc:MGI:1917592]	NA	NA	0	NA	NA	NA	0	NA	NA	0	0	0	NA	366.263	431.763	424.33	440.56	342.617	378.619	397.34	448.929	0.755678	0.0301062	-0.123557	0.113805	0.0887513	0.142903	-0.0738751	0.0702758	0.139903	0.316014
Pthlh	parathyroid hormone-like peptide [Source:MGI Symbol;Acc:MGI:97800]	NA	NA	0	NA	NA	NA	0	NA	NA	0	0	0	NA	4.60549	4.79343	4.73059	4.7704	4.54359	4.55687	4.66417	4.8453	0.761881	0.0280128	-0.0291401	0.0285632	0.009526	0.0216154	-0.00210712	0.00210405	0.0356824	0.0906457
Ptk2b	PTK2 protein tyrosine kinase 2 beta [Source:MGI Symbol;Acc:MGI:104908]	NA	NA	0	NA	NA	NA	0	NA	NA	0	0	0	NA	1421.07	1527.71	1870.15	1362.3	1261.7	1441.33	1679.52	1883.61	0.75539	0.0302059	-0.0531427	0.0512545	0.343036	-0.114074	-0.0992053	0.0928203	0.313468	0.478918
Ptprj	protein tyrosine phosphatase/ receptor type/ J [Source:MGI Symbol;Acc:MGI:104574]	NA	NA	0	NA	NA	NA	0	NA	NA	0	0	0	NA	1227.94	1158.64	1407.53	1095.73	929.37	963.613	1115.8	1282.95	0.749907	0.0321379	0.0412966	-0.0425136	0.23823	-0.123044	-0.0263365	0.0258644	0.237415	0.4388
Ptprr	protein tyrosine phosphatase/ receptor type/ R [Source:MGI Symbol;Acc:MGI:109559]	NA	NA	0	NA	NA	NA	0	NA	NA	0	0	0	NA	7.41681	7.21892	7.5035	7.61958	7.86282	7.24454	8.98061	8.11496	0.80791	0.015265	0.0193762	-0.01964	0.0361396	0.0582881	0.0578674	-0.0602859	0.249634	0.103405
Pttg1	pituitary tumor-transforming gene 1 [Source:MGI Symbol;Acc:MGI:1353578]	NA	NA	0	NA	NA	NA	0	NA	NA	0	0	0	NA	294.853	279.729	355.075	348.788	303.713	289.907	367.828	352.099	0.868785	0.00510673	0.0374825	-0.0384823	0.305613	0.279838	0.0331683	-0.0339489	0.30949	0.246439
R3hdm4	R3H domain containing 4 [Source:MGI Symbol;Acc:MGI:1924814]	NA	NA	0	NA	NA	NA	0	NA	NA	0	0	0	NA	1493.17	1681.13	1663.26	1851.88	1631.83	1573.79	1746.73	1883.76	0.750422	0.0319531	-0.0880594	0.0829923	0.0675769	0.22255	0.0258838	-0.0263567	0.124057	0.233011
Rab29	RAB29/ member RAS oncogene family [Source:MGI Symbol;Acc:MGI:2385107]	NA	NA	0	NA	NA	NA	0	NA	NA	0	0	0	NA	245.126	238.258	287.252	337.781	261.486	227.661	342.447	304.822	0.846393	0.00804917	0.0203548	-0.0206461	0.249144	0.482916	0.0964665	-0.103382	0.485615	0.3177
Rab2b	RAB2B/ member RAS oncogene family [Source:MGI Symbol;Acc:MGI:1923588]	NA	NA	0	NA	NA	NA	0	NA	NA	0	0	0	NA	819.146	764.551	932.955	1030	883.891	836.426	1060.09	1061.82	0.858289	0.00637992	0.0488956	-0.0506111	0.236583	0.379352	0.039266	-0.0403647	0.301517	0.303861
Rab31	RAB31/ member RAS oncogene family [Source:MGI Symbol;Acc:MGI:1914603]	NA	NA	0	NA	NA	NA	0	NA	NA	0	0	0	NA	3328.36	3487.25	4330.59	4157.22	3574.57	3681.9	4083.28	4687.87	0.79711	0.0178313	-0.0340316	0.0332473	0.34572	0.286775	-0.021498	0.0211824	0.170462	0.369665
Rab37	RAB37/ member RAS oncogene family [Source:MGI Symbol;Acc:MGI:1929945]	NA	NA	0	NA	NA	NA	0	NA	NA	0	0	0	NA	7.40619	7.06498	7.50492	7.42423	7.20456	7.39959	7.48764	8.16288	0.739155	0.0361425	0.033622	-0.0344243	0.0527271	0.0371304	-0.0193964	0.0191391	0.0362046	0.16077
Rab3d	RAB3D/ member RAS oncogene family [Source:MGI Symbol;Acc:MGI:97844]	NA	NA	0	NA	NA	NA	0	NA	NA	0	0	0	NA	333.233	369.315	395.516	579.099	388.085	314.351	561.211	560.843	0.865403	0.00549724	-0.0760654	0.0722549	0.171136	0.721211	0.144007	-0.159992	0.676176	0.675231
Rab40b	Rab40B/ member RAS oncogene family [Source:MGI Symbol;Acc:MGI:2183451]	NA	NA	0	NA	NA	NA	0	NA	NA	0	0	0	NA	94.8945	81.4124	90.5927	115.972	74.0512	75.2339	98.7061	89.4857	0.783775	0.0213517	0.106308	-0.114769	0.0393778	0.39569	-0.0114751	0.0113845	0.40314	0.261658
Rab40c	Rab40C/ member RAS oncogene family [Source:MGI Symbol;Acc:MGI:2183454]	NA	NA	0	NA	NA	NA	0	NA	NA	0	0	0	NA	847.301	863.537	1082.48	964.002	803.96	822.059	1029.02	903.995	0.796678	0.0179391	-0.0137567	0.0136268	0.339641	0.172405	-0.016149	0.0159702	0.339934	0.153042
Rab43	RAB43/ member RAS oncogene family [Source:MGI Symbol;Acc:MGI:1917084]	NA	NA	0	NA	NA	NA	0	NA	NA	0	0	0	NA	1653.31	1556.72	1881.05	1889.26	1771.96	1681.47	1960.47	2035.22	0.838831	0.00924171	0.0427723	-0.0440792	0.228954	0.235238	0.0373154	-0.0383063	0.183171	0.237159
Rab5a	RAB5A/ member RAS oncogene family [Source:MGI Symbol;Acc:MGI:105926]	NA	NA	0	NA	NA	NA	0	NA	NA	0	0	0	NA	3732.25	3639.68	4114.7	4026.33	3701.56	3750.74	3917.47	4532.39	0.796819	0.0179038	0.0180036	-0.0182311	0.158745	0.127422	-0.00955294	0.0094901	0.0722353	0.282585
Rab5b	RAB5B/ member RAS oncogene family [Source:MGI Symbol;Acc:MGI:105938]	NA	NA	0	NA	NA	NA	0	NA	NA	0	0	0	NA	2914.17	3213.95	3057.14	3404.36	2868.12	2837.93	3052.87	3311.7	0.733	0.0385652	-0.0723595	0.068903	-0.00326433	0.151939	0.00761253	-0.00765291	0.0976719	0.215078
Rabac1	Rab acceptor 1 (prenylated) [Source:MGI Symbol;Acc:MGI:1201692]	NA	NA	0	NA	NA	NA	0	NA	NA	0	0	0	NA	1318.58	1509.81	1583.95	1614.1	1403.62	1364.94	1502.22	1746.63	0.78314	0.0215293	-0.100994	0.0943845	0.163542	0.190743	0.0200181	-0.0202998	0.117957	0.335432
Rabgap1l	RAB GTPase activating protein 1-like [Source:MGI Symbol;Acc:MGI:1352507]	NA	NA	0	NA	NA	NA	0	NA	NA	0	0	0	NA	1330.52	1194.43	1457.2	1400.46	1405.09	1256.79	1622.13	1485.48	0.805766	0.0157544	0.0757362	-0.0799335	0.206936	0.149639	0.0782202	-0.0827056	0.285446	0.15848
Rai2	retinoic acid induced 2 [Source:MGI Symbol;Acc:MGI:1344378]	NA	NA	0	NA	NA	NA	0	NA	NA	0	0	0	NA	41.5838	35.4285	65.8362	50.2757	35.7205	38.7516	52.2227	49.4713	0.74346	0.0345043	0.110932	-0.120178	0.773791	0.384772	-0.0599463	0.0575545	0.487977	0.409892
Ranbp9	RAN binding protein 9 [Source:MGI Symbol;Acc:MGI:1928741]	NA	NA	0	NA	NA	NA	0	NA	NA	0	0	0	NA	1913.8	1890.12	2041.73	2019.36	2112.39	1993.67	2151.31	2164.93	0.72006	0.0439745	0.00895525	-0.00901118	0.102304	0.0864111	0.04112	-0.0423265	0.0674626	0.0765682
Rasa3	RAS p21 protein activator 3 [Source:MGI Symbol;Acc:MGI:1197013]	NA	NA	0	NA	NA	NA	0	NA	NA	0	0	0	NA	2461.35	2534.41	2606.13	2599.27	2973.42	2787.88	3056.2	3150.96	0.85043	0.00745483	-0.0212542	0.0209456	0.0612015	0.0574038	0.0457307	-0.0472278	0.085346	0.129398
Rbl2	RB transcriptional corepressor like 2 [Source:MGI Symbol;Acc:MGI:105085]	NA	NA	0	NA	NA	NA	0	NA	NA	0	0	0	NA	1531.42	1432.56	1681.77	1984.28	1507.03	1334.69	1788.05	1614.52	0.728497	0.0403987	0.0473336	-0.0489394	0.18244	0.421075	0.0849431	-0.090259	0.33162	0.184335
Rbm44	RNA binding motif protein 44 [Source:MGI Symbol;Acc:MGI:2685663]	NA	NA	0	NA	NA	NA	0	NA	NA	0	0	0	NA	2.99391	2.97971	3.11914	3.01103	2.95815	2.93963	3.10689	2.98782	0.715847	0.045829	0.00342478	-0.00343292	0.0625438	0.0116503	0.00452407	-0.0045383	0.0752987	0.0189214
Rbm47	RNA binding motif protein 47 [Source:MGI Symbol;Acc:MGI:2384294]	NA	NA	0	NA	NA	NA	0	NA	NA	0	0	0	NA	85.9949	96.4909	96.7516	102.339	76.983	94.2016	102.474	148.197	0.779218	0.0226464	-0.0854611	0.0806805	0.084574	0.165572	-0.152942	0.138271	0.259705	0.791962
Rdh10	retinol dehydrogenase 10 (all-trans) [Source:MGI Symbol;Acc:MGI:1924238]	NA	NA	0	NA	NA	NA	0	NA	NA	0	0	0	NA	652.559	562.642	694.63	655.329	483.465	508.819	577.002	701.977	0.844573	0.00832669	0.102985	-0.110906	0.193121	0.109097	-0.0373413	0.0363991	0.217823	0.500671
Reep2	receptor accessory protein 2 [Source:MGI Symbol;Acc:MGI:2385070]	NA	NA	0	NA	NA	NA	0	NA	NA	0	0	0	NA	93.4966	70.3641	110.58	108.984	84.8528	85.2776	137.665	110.369	0.850341	0.00746762	0.190516	-0.219559	0.432623	0.411652	-0.00360634	0.00359734	0.694519	0.375696
Rfx2	regulatory factor X/ 2 (influences HLA class II expression) [Source:MGI Symbol;Acc:MGI:106583]	NA	NA	0	NA	NA	NA	0	NA	NA	0	0	0	NA	38.5737	34.3485	39.0019	34.6675	39.0726	38.5004	44.0853	44.0925	0.718727	0.0445563	0.0812588	-0.0861102	0.0971868	-0.0727753	0.0106032	-0.0106817	0.184744	0.184978
Rgcc	regulator of cell cycle [Source:MGI Symbol;Acc:MGI:1913464]	NA	NA	0	NA	NA	NA	0	NA	NA	0	0	0	NA	97.2051	107.923	137.351	111.719	102.501	63.2152	142.153	125.709	0.82293	0.0121017	-0.0774194	0.0734756	0.421342	0.123346	0.306925	-0.390374	0.778729	0.601376
Rgp1	RAB6A GEF compex partner 1 [Source:MGI Symbol;Acc:MGI:1915956]	NA	NA	0	NA	NA	NA	0	NA	NA	0	0	0	NA	1854	1868.62	1850.34	1849.88	1760.83	1787.25	1837.81	1875.08	0.767987	0.0260423	-0.00567687	0.00565462	-0.00853149	-0.008886	-0.0107834	0.0107034	0.0509513	0.0799143
Rgs10	regulator of G-protein signalling 10 [Source:MGI Symbol;Acc:MGI:1915115]	NA	NA	0	NA	NA	NA	0	NA	NA	0	0	0	NA	205.073	219.949	184.527	221.23	209.265	215.821	291.518	274.812	0.731576	0.0391394	-0.0514004	0.0496319	-0.203709	0.0580101	-0.0224248	0.0220816	0.455828	0.370689
Rhbdd1	rhomboid domain containing 1 [Source:MGI Symbol;Acc:MGI:1924117]	NA	NA	0	NA	NA	NA	0	NA	NA	0	0	0	NA	1422.92	1433.69	1865.62	1453.25	1365.54	1598	1838.38	1852.65	0.7814	0.0220206	-0.00545209	0.00543157	0.385349	0.0249805	-0.117848	0.108944	0.311108	0.322267
Rhbdf2	rhomboid 5 homolog 2 [Source:MGI Symbol;Acc:MGI:2442473]	NA	NA	0	NA	NA	NA	0	NA	NA	0	0	0	NA	491.739	389.021	605.746	543.07	462.235	382.926	616.322	489.333	0.727323	0.0408853	0.159142	-0.178899	0.459963	0.30239	0.129401	-0.142161	0.544458	0.21159
Rho	rhodopsin [Source:MGI Symbol;Acc:MGI:97914]	NA	NA	0	NA	NA	NA	0	NA	NA	0	0	0	NA	2.84689	2.76184	2.84614	2.75064	2.74958	2.75121	2.95378	2.86507	0.744123	0.0342565	0.0217119	-0.0220436	0.0213356	-0.0279046	-0.000426756	0.00042663	0.102922	0.0589341
Rhoq	ras homolog family member Q [Source:MGI Symbol;Acc:MGI:1931553]	NA	NA	0	NA	NA	NA	0	NA	NA	0	0	0	NA	5698.52	5497.61	6902.91	6711.01	6117.93	5762.09	6369.76	7501.48	0.726695	0.0411471	0.025659	-0.0261237	0.302276	0.261602	0.042578	-0.043873	0.100774	0.33671
Rhpn2	rhophilin/ Rho GTPase binding protein 2 [Source:MGI Symbol;Acc:MGI:1289234]	NA	NA	0	NA	NA	NA	0	BRCA_LUSC_THCA	ambiguous	1	1	0	NA	9.16728	9.7697	9.51035	9.54583	9.12422	9.44183	10.1354	10.7628	0.811277	0.0145154	-0.046641	0.0451803	0.00636435	0.0117361	-0.0248942	0.0244719	0.12673	0.213382
Rin2	Ras and Rab interactor 2 [Source:MGI Symbol;Acc:MGI:1921280]	NA	NA	0	NA	NA	NA	0	NA	NA	0	0	0	NA	1249.97	1160.86	1480.15	2022.07	1447.83	985.767	1676.94	1703.4	0.71473	0.0463286	0.0523614	-0.0543336	0.296211	0.746302	0.250802	-0.303772	0.462739	0.485328
Rmnd5a	required for meiotic nuclear division 5 homolog A [Source:MGI Symbol;Acc:MGI:1915727]	NA	NA	0	NA	NA	NA	0	NA	NA	0	0	0	NA	2234.72	2197.06	2547.81	2801.79	2364.58	2048.38	2516.86	2724.29	0.775489	0.0237416	0.0122083	-0.0123125	0.201373	0.338463	0.0998375	-0.107264	0.18988	0.304136
Rnase4	ribonuclease/ RNase A family 4 [Source:MGI Symbol;Acc:MGI:1926217]	NA	NA	0	NA	NA	NA	0	NA	NA	0	0	0	NA	3312.21	2644.23	4061.85	4547.45	3428.28	3226.67	4451.95	4158.33	0.717635	0.0450361	0.153343	-0.171602	0.447685	0.610607	0.0430561	-0.0443807	0.420008	0.321576
Rnd2	Rho family GTPase 2 [Source:MGI Symbol;Acc:MGI:1338755]	NA	NA	0	NA	NA	NA	0	NA	NA	0	0	0	NA	88.1193	91.0026	98.4414	98.6781	95.0318	82.5673	98.7861	120.382	0.812046	0.0143475	-0.023412	0.0230381	0.136395	0.139859	0.0978587	-0.104983	0.153755	0.438999
Rnf115	ring finger protein 115 [Source:MGI Symbol;Acc:MGI:1915095]	NA	NA	0	NA	NA	NA	0	NA	NA	0	0	0	NA	1062.94	1010.3	1031.14	1143.34	1037.33	1023.92	1100.8	1122.48	0.734893	0.0378101	0.0361719	-0.0371022	-0.00765308	0.141366	0.00935386	-0.00941491	0.0950258	0.123164
Rnf181	ring finger protein 181 [Source:MGI Symbol;Acc:MGI:1913760]	NA	NA	0	NA	NA	NA	0	NA	NA	0	0	0	NA	1610.37	1785.61	2020.06	2289.64	1559.88	1790.43	2068.7	2241.57	0.836582	0.00961686	-0.0764349	0.0725883	0.250572	0.431294	-0.102862	0.0960133	0.30443	0.420214
Rnf40	ring finger protein 40 [Source:MGI Symbol;Acc:MGI:2142048]	NA	NA	0	NA	NA	NA	0	NA	NA	0	0	1	Ring Finger proteins	2105.23	2114.97	2184.44	2293.69	2159.63	2200.2	2250.56	2433.17	0.773359	0.0243813	-0.0033329	0.00332522	0.049952	0.120358	-0.0134861	0.0133612	0.0460117	0.158564
Rprm	reprimo/ TP53 dependent G2 arrest mediator candidate [Source:MGI Symbol;Acc:MGI:1915124]	NA	NA	0	NA	NA	NA	0	NA	NA	0	0	0	NA	368.243	285.402	594.222	515.763	271.328	261.026	416.654	344.017	0.707411	0.049683	0.172152	-0.195513	0.862494	0.658202	0.0276505	-0.0281908	0.646463	0.370094
Rptor	regulatory associated protein of MTOR/ complex 1 [Source:MGI Symbol;Acc:MGI:1921620]	NA	NA	0	NA	NA	NA	0	NA	NA	0	0	0	NA	2258.83	2245.54	2481.55	2354.08	2239.44	2340.01	2576.8	2482.39	0.893613	0.00277517	0.00425134	-0.00426391	0.139915	0.0638393	-0.0320355	0.0313395	0.170405	0.116556
Rragd	Ras-related GTP binding D [Source:MGI Symbol;Acc:MGI:1098604]	NA	NA	0	NA	NA	NA	0	NA	NA	0	0	0	NA	175.759	154.981	276.949	321.275	199.33	156.647	290.155	284.763	0.802085	0.0166181	0.0879025	-0.0936078	0.743924	0.958113	0.163375	-0.184268	0.705038	0.67798
Rslcan18	regulator of sex-limitation candidate 18 [Source:MGI Symbol;Acc:MGI:5433745]	NA	NA	0	NA	NA	NA	0	NA	NA	0	0	0	NA	53.6172	61.7897	60.1564	64.9571	58.6389	58.8798	68.1251	64.6488	0.771626	0.0249097	-0.105961	0.0987085	0.0600617	0.170831	-0.00296081	0.00295475	0.213368	0.137805
Rtn4r	reticulon 4 receptor [Source:MGI Symbol;Acc:MGI:2136886]	NA	NA	0	NA	NA	NA	0	NA	NA	0	0	0	NA	101.245	75.0828	117.355	106.034	96.1545	90.6806	140.036	119.674	0.833498	0.0101467	0.199591	-0.231706	0.412622	0.266261	0.0416606	-0.0428995	0.584037	0.357342
Rufy4	RUN and FYVE domain containing 4 [Source:MGI Symbol;Acc:MGI:3588214]	NA	NA	0	NA	NA	NA	0	NA	NA	0	0	0	NA	13.3646	12.4574	13.2548	12.7742	13.3342	13.5458	14.8365	18.0134	0.753418	0.0308922	0.0498167	-0.0515987	0.037908	-0.0153733	-0.0113979	0.0113086	0.14262	0.422534
S100b	S100 protein/ beta polypeptide/ neural [Source:MGI Symbol;Acc:MGI:98217]	NA	NA	0	NA	NA	NA	0	NA	NA	0	0	0	NA	24.6576	24.2851	26.8254	23.8763	27.1898	28.1809	31.2357	29.2359	0.711561	0.0477635	0.0109397	-0.0110233	0.132505	-0.0355143	-0.0260592	0.0255969	0.174074	0.0786202
Samd12	sterile alpha motif domain containing 12 [Source:MGI Symbol;Acc:MGI:2444518]	NA	NA	0	NA	NA	NA	0	NA	NA	0	0	0	NA	95.4318	68.3433	178.31	126.288	90.4648	74.6287	142.646	121.826	0.733245	0.0384669	0.220826	-0.260844	1.12267	0.625001	0.132145	-0.14548	0.789155	0.561537
Samd8	sterile alpha motif domain containing 8 [Source:MGI Symbol;Acc:MGI:1914880]	NA	NA	0	NA	NA	NA	0	NA	NA	0	0	0	NA	2870.28	2624.63	3181.27	2905.32	2800.1	2941.41	3114.33	3309.05	0.76496	0.0270081	0.0630952	-0.0659813	0.211507	0.0806024	-0.0359515	0.0350774	0.117492	0.204988
Sash1	SAM and SH3 domain containing 1 [Source:MGI Symbol;Acc:MGI:1917347]	NA	NA	0	NA	NA	NA	0	NA	NA	0	0	0	NA	6468.8	5182.61	6060.76	6353.96	5559.95	5903.21	6747.26	6475.06	0.709303	0.048802	0.151066	-0.168754	0.0570664	0.125225	-0.0438614	0.0425672	0.23537	0.17596
Sat1	spermidine/spermine N1-acetyl transferase 1 [Source:MGI Symbol;Acc:MGI:98233]	NA	NA	0	NA	NA	NA	0	NA	NA	0	0	0	NA	2593.72	2316.61	3532.02	2522	2618.33	2877.06	3766.87	3595.26	0.797095	0.0178349	0.0792041	-0.0838063	0.524672	0.0387467	-0.0695755	0.0663739	0.455142	0.387871
Saxo2	stabilizer of axonemal microtubules 2 [Source:MGI Symbol;Acc:MGI:1914618]	NA	NA	0	NA	NA	NA	0	NA	NA	0	0	0	NA	19.489	16.6065	18.1972	19.3967	16.6265	16.3938	19.8044	18.1897	0.74956	0.0322626	0.11084	-0.12007	0.0118957	0.103993	0.0101292	-0.0102008	0.262469	0.13977
Sbno1	strawberry notch 1 [Source:MGI Symbol;Acc:MGI:2384298]	NA	NA	0	NA	NA	NA	0	NA	NA	0	0	0	NA	7071.31	6909.92	7458.69	6874.02	7326.46	7151.86	7653.16	8030.68	0.774775	0.0239548	0.0165587	-0.016751	0.0935026	-0.0242655	0.0172936	-0.0175035	0.0802327	0.149701
Sbsn	suprabasin [Source:MGI Symbol;Acc:MGI:2446326]	NA	NA	0	NA	NA	NA	0	NA	NA	0	0	0	NA	123	147.001	157.834	139.948	111.308	142.825	160.629	195.859	0.803858	0.0161985	-0.134307	0.122862	0.225442	0.05193	-0.191024	0.168663	0.338145	0.624229
Scamp2	secretory carrier membrane protein 2 [Source:MGI Symbol;Acc:MGI:1346518]	NA	NA	0	NA	NA	NA	0	NA	NA	0	0	0	NA	1422.5	1338.05	1575.23	1506.64	1348.14	1283.47	1546.02	1800.47	0.910683	0.00166412	0.0434732	-0.044824	0.190609	0.126383	0.0350264	-0.035898	0.232613	0.452435
Scn1b	sodium channel/ voltage-gated/ type I/ beta [Source:MGI Symbol;Acc:MGI:98247]	NA	NA	0	NA	NA	NA	0	NA	NA	0	0	0	NA	1233.42	1201.94	2120.27	1904.81	1434.91	1277.47	1903.1	2039.61	0.785155	0.0209691	0.0185298	-0.0187708	0.800111	0.645515	0.0814024	-0.0862716	0.488795	0.588735
Scn3b	sodium channel/ voltage-gated/ type III/ beta [Source:MGI Symbol;Acc:MGI:1918882]	NA	NA	0	NA	NA	NA	0	NA	NA	0	0	0	NA	142.695	86.5526	487.179	280.197	93.0925	83.0886	249.26	193.04	0.767605	0.026163	0.316027	-0.405256	2.08755	1.28954	0.0796777	-0.0843367	1.50059	1.13184
Scrn3	secernin 3 [Source:MGI Symbol;Acc:MGI:1921866]	NA	NA	0	NA	NA	NA	0	NA	NA	0	0	0	NA	557.525	489.74	745.156	796.528	518.465	517.441	722.739	640.076	0.749398	0.0323212	0.0904811	-0.0965377	0.508989	0.60517	0.00142464	-0.00142605	0.480655	0.305423
Scube3	signal peptide/ CUB domain/ EGF-like 3 [Source:MGI Symbol;Acc:MGI:3045253]	NA	NA	0	NA	NA	NA	0	NA	NA	0	0	0	NA	131.949	103.727	136.333	124.785	108.65	77.5486	152.565	110.033	0.709632	0.04865	0.163171	-0.184007	0.210332	0.0826373	0.222845	-0.263668	0.712586	0.241102
Sdc1	syndecan 1 [Source:MGI Symbol;Acc:MGI:1349162]	NA	NA	0	NA	NA	NA	0	NA	NA	0	0	0	NA	7060.82	6063.43	7314.24	7164.16	5619.05	5085.68	6474.56	6689.13	0.879889	0.00395113	0.105672	-0.114029	0.156545	0.126634	0.0701497	-0.0737358	0.274607	0.321643
Sdf2	stromal cell derived factor 2 [Source:MGI Symbol;Acc:MGI:108019]	NA	NA	0	NA	NA	NA	0	NA	NA	0	0	0	NA	1217.21	1175.75	1193.2	1185.72	1104.66	1158	1208.63	1261.01	0.760381	0.0285104	0.0247844	-0.0252177	-0.00396205	-0.0130364	-0.0344131	0.0336113	0.0953586	0.156565
Sds	serine dehydratase [Source:MGI Symbol;Acc:MGI:98270]	NA	NA	0	NA	NA	NA	0	NA	NA	0	0	0	NA	12.7898	12.4833	13.31	13.2349	12.9038	12.4607	13.3449	13.1613	0.782939	0.0215859	0.0173946	-0.0176069	0.0749108	0.0667398	0.0249822	-0.0254225	0.0734789	0.0534858
Sec22c	SEC22 homolog C/ vesicle trafficking protein [Source:MGI Symbol;Acc:MGI:2447871]	NA	NA	0	NA	NA	NA	0	NA	NA	0	0	0	NA	705.931	628.227	765.174	865.568	680.969	644.076	835.235	766.941	0.792607	0.018976	0.0816695	-0.0865716	0.197931	0.37579	0.039619	-0.0407379	0.334212	0.211145
Secisbp2l	SECIS binding protein 2-like [Source:MGI Symbol;Acc:MGI:1917604]	NA	NA	0	NA	NA	NA	0	NA	NA	0	0	0	NA	6163.29	5854.78	6598.08	6567.36	6813.27	7127.95	7552.76	7683.77	0.834834	0.00991496	0.0365667	-0.0375177	0.134913	0.12818	-0.0329368	0.0322016	0.115719	0.140529
Sept3	NA	NA	NA	0	NA	NA	NA	0	NA	NA	0	0	0	NA	47.8739	41.9873	52.6446	43.4834	43.5111	46.6706	52.7786	54.5092	0.752749	0.0311271	0.0915421	-0.0977465	0.228588	-0.0472339	-0.0514518	0.0496799	0.227118	0.273665
Serinc3	serine incorporator 3 [Source:MGI Symbol;Acc:MGI:1349457]	NA	NA	0	NA	NA	NA	0	NA	NA	0	0	0	NA	12169.4	11970.1	18230.9	17300.4	13625.6	13132.1	17894.4	18486.9	0.820561	0.0125701	0.0118613	-0.0119597	0.594995	0.519414	0.0263659	-0.0268567	0.419561	0.466554
Serinc5	serine incorporator 5 [Source:MGI Symbol;Acc:MGI:2444223]	NA	NA	0	NA	NA	NA	0	NA	NA	0	0	0	NA	774.712	850.435	830.454	785.535	730.785	647.958	804.944	882.041	0.76049	0.0284742	-0.0688376	0.0657021	0.0314021	-0.0488228	0.0841649	-0.0893808	0.223608	0.355564
Serpina3c	serine (or cysteine) peptidase inhibitor/ clade A/ member 3C [Source:MGI Symbol;Acc:MGI:102848]	NA	NA	0	NA	NA	NA	0	NA	NA	0	0	0	NA	2.96651	2.95621	2.99926	2.98341	3.07875	2.95982	3.22013	3.10407	0.778706	0.0227951	0.00250501	-0.00250937	0.0183441	0.0107012	0.0281378	-0.0286975	0.0929121	0.0399545
Serpina3f	serine (or cysteine) peptidase inhibitor/ clade A/ member 3F [Source:MGI Symbol;Acc:MGI:2182838]	NA	NA	0	NA	NA	NA	0	NA	NA	0	0	0	NA	3.11022	3.1399	3.11552	3.22537	3.07271	3.08076	3.17836	3.12871	0.724154	0.0422164	-0.0068675	0.00683496	-0.00441263	0.0455798	-0.00188812	0.00188565	0.0468808	0.0241646
Serpina3n	serine (or cysteine) peptidase inhibitor/ clade A/ member 3N [Source:MGI Symbol;Acc:MGI:105045]	NA	NA	0	NA	NA	NA	0	NA	NA	0	0	0	NA	81.9371	73.9499	183.668	395.65	80.2652	56.4378	198.37	220.831	0.819887	0.0127053	0.072088	-0.0758804	1.2366	2.34372	0.231802	-0.276312	1.53715	1.69189
Serpinb10	serine (or cysteine) peptidase inhibitor/ clade B (ovalbumin)/ member 10 [Source:MGI Symbol;Acc:MGI:2138648]	NA	NA	0	NA	NA	NA	0	NA	NA	0	0	0	NA	13.4435	12.8091	14.6807	14.1124	12.903	13.2847	14.8098	15.4597	0.941613	0.000476063	0.0344444	-0.035287	0.161455	0.104503	-0.0211845	0.0208779	0.177663	0.239621
Serpinb1a	serine (or cysteine) peptidase inhibitor/ clade B/ member 1a [Source:MGI Symbol;Acc:MGI:1913472]	NA	NA	0	NA	NA	NA	0	NA	NA	0	0	0	NA	368.068	160.246	495.025	513.959	264.157	204.68	536.968	453.669	0.806371	0.0156154	0.478576	-0.721106	0.906107	0.960258	0.172309	-0.195716	1.19575	0.952556
Serpine2	serine (or cysteine) peptidase inhibitor/ clade E/ member 2 [Source:MGI Symbol;Acc:MGI:101780]	NA	NA	0	NA	NA	NA	0	NA	NA	0	0	0	NA	7836.51	7277.8	14003.1	16475.5	7486.35	6459.83	14051.2	13876.1	0.89071	0.00300183	0.0523676	-0.0543403	0.889827	1.12441	0.102464	-0.110302	1.01083	0.992732
Sfrp2	secreted frizzled-related protein 2 [Source:MGI Symbol;Acc:MGI:108078]	NA	NA	0	NA	NA	NA	0	NA	NA	0	0	0	NA	213.098	127.624	250.659	631.459	112.112	102.001	266.035	291.736	0.81113	0.0145475	0.322921	-0.416695	0.557129	1.89009	0.0665685	-0.0697892	1.31325	1.44629
Sh3glb2	SH3-domain GRB2-like endophilin B2 [Source:MGI Symbol;Acc:MGI:2385131]	NA	NA	0	NA	NA	NA	0	NA	NA	0	0	0	NA	1015.56	905.391	1053.6	1030.96	961.653	957.294	1086.93	1091.41	0.873097	0.00463533	0.0804549	-0.085208	0.133502	0.102166	0.00327311	-0.00328056	0.179941	0.185876
Sh3yl1	Sh3 domain YSC-like 1 [Source:MGI Symbol;Acc:MGI:1346118]	NA	NA	0	NA	NA	NA	0	NA	NA	0	0	0	NA	243.431	200.666	281.071	262.877	194.255	235.019	260.494	259.509	0.730145	0.0397218	0.132636	-0.146076	0.340058	0.24351	-0.143945	0.130877	0.279351	0.273886
Shc3	src homology 2 domain-containing transforming protein C3 [Source:MGI Symbol;Acc:MGI:106179]	NA	NA	0	NA	NA	NA	0	NA	NA	0	0	0	NA	12.8754	12.5568	13.9538	12.5803	12.4121	11.8449	13.4233	13.2431	0.797291	0.0177861	0.0179588	-0.0181852	0.133996	-0.0154929	0.0333425	-0.0341313	0.146331	0.126837
Shd	src homology 2 domain-containing transforming protein D [Source:MGI Symbol;Acc:MGI:1099461]	NA	NA	0	NA	NA	NA	0	NA	NA	0	0	0	NA	6.90268	6.86412	7.1032	6.86714	6.96294	6.77069	7.35067	7.45412	0.888587	0.00317491	0.00403506	-0.00404637	0.0453463	-0.00341215	0.0200552	-0.0203379	0.0982345	0.118396
Shtn1	shootin 1 [Source:MGI Symbol;Acc:MGI:1918903]	NA	NA	0	Spitzoidtumour	fusion	T	1	NA	NA	0	1	0	NA	48.7009	52.8748	52.3941	57.2878	43.2764	43.4088	53.7528	46.525	0.785004	0.0210107	-0.0605353	0.0580972	0.0449192	0.173744	-0.00220494	0.00220157	0.310554	0.102222
Siglec15	sialic acid binding Ig-like lectin 15 [Source:MGI Symbol;Acc:MGI:3646642]	NA	NA	0	NA	NA	NA	0	NA	NA	0	0	0	NA	1.33061	1.32854	1.32892	1.33999	1.33803	1.32927	1.36185	1.39391	0.832059	0.0104002	0.00111799	-0.00111886	-0.000715129	0.0112524	0.00473353	-0.00474911	0.0301916	0.063761
Sik1	salt inducible kinase 1 [Source:MGI Symbol;Acc:MGI:104754]	NA	NA	0	NA	NA	NA	0	NA	NA	0	0	0	NA	1578.52	1429.12	2252.65	1766.92	2217.42	1370.72	3121.12	2190.11	0.709016	0.0489353	0.0699375	-0.0735014	0.58299	0.232607	0.305646	-0.388302	0.798829	0.287767
Sik2	salt inducible kinase 2 [Source:MGI Symbol;Acc:MGI:2445031]	NA	NA	0	NA	NA	NA	0	NA	NA	0	0	0	NA	931.643	872.117	945.767	950.112	910.825	994.275	1059.5	1192.55	0.841531	0.00880386	0.0468415	-0.0484135	0.0685494	0.0751616	-0.0646214	0.0618505	0.153521	0.324185
Sil1	endoplasmic reticulum chaperone SIL1 homolog (S. cerevisiae) [Source:MGI Symbol;Acc:MGI:1932040]	NA	NA	0	NA	NA	NA	0	NA	NA	0	0	0	NA	812.894	804.42	1029.18	1039.74	851.322	783.223	997.084	1024.76	0.84032	0.00899859	0.00753902	-0.00757863	0.347894	0.362617	0.0588882	-0.0613945	0.286897	0.326401
Sirt2	sirtuin 2 [Source:MGI Symbol;Acc:MGI:1927664]	NA	NA	0	NA	NA	NA	0	NA	NA	0	0	1	HA_e	1491.26	1537.14	1751.27	1914.74	1639.6	1556.73	1934.85	1885.61	0.84714	0.00793694	-0.022023	0.0216919	0.209851	0.338591	0.0369274	-0.0378975	0.275805	0.238611
Slc15a2	solute carrier family 15 (H+/peptide transporter)/ member 2 [Source:MGI Symbol;Acc:MGI:1890457]	NA	NA	0	NA	NA	NA	0	NA	NA	0	0	0	NA	7.16207	7.19754	7.34102	7.12133	7.61718	7.44277	7.85349	7.74536	0.77675	0.0233676	-0.00356811	0.00355931	0.0320362	-0.0117987	0.0166121	-0.0168056	0.0606886	0.0406878
Slc17a5	solute carrier family 17 (anion/sugar transporter)/ member 5 [Source:MGI Symbol;Acc:MGI:1924105]	NA	NA	0	NA	NA	NA	0	NA	NA	0	0	0	NA	603.496	569.468	697.245	687.738	740.954	649.99	799.817	841.326	0.820947	0.0124929	0.0412573	-0.042472	0.249578	0.229771	0.0913919	-0.0975754	0.201677	0.274673
Slc19a2	solute carrier family 19 (thiamine transporter)/ member 2 [Source:MGI Symbol;Acc:MGI:1928761]	NA	NA	0	NA	NA	NA	0	NA	NA	0	0	0	NA	2424.68	2189.85	2776.31	2427.82	2357.25	2176.67	2584.98	2517.97	0.710111	0.048429	0.0716112	-0.0753522	0.266984	0.0734743	0.0563459	-0.0586362	0.189395	0.151503
Slc25a38	solute carrier family 25/ member 38 [Source:MGI Symbol;Acc:MGI:2384782]	NA	NA	0	NA	NA	NA	0	NA	NA	0	0	0	NA	348.895	346.961	340.135	361.976	338.497	351.489	367.661	379.529	0.788042	0.0201821	0.00400379	-0.00401493	-0.0326812	0.0571049	-0.027423	0.0269114	0.0918092	0.137643
Slc26a8	solute carrier family 26/ member 8 [Source:MGI Symbol;Acc:MGI:2385046]	NA	NA	0	NA	NA	NA	0	NA	NA	0	0	0	NA	8.80052	9.121	9.80562	9.3613	9.05937	8.83265	9.57329	9.43898	0.777878	0.0230363	-0.0260323	0.0255709	0.129987	0.0630874	0.0181664	-0.018398	0.0977697	0.0773867
Slc27a1	solute carrier family 27 (fatty acid transporter)/ member 1 [Source:MGI Symbol;Acc:MGI:1347098]	NA	NA	0	NA	NA	NA	0	NA	NA	0	0	0	NA	339.735	318.839	394.54	423.764	360.002	310.981	551.006	405.229	0.850042	0.00751071	0.0450647	-0.0465179	0.260825	0.363913	0.101729	-0.10945	0.715792	0.272463
Slc2a3	solute carrier family 2 (facilitated glucose transporter)/ member 3 [Source:MGI Symbol;Acc:MGI:95757]	NA	NA	0	NA	NA	NA	0	NA	NA	0	0	0	NA	135.309	159.375	139.99	147.65	139.556	125.103	156.945	202.395	0.712726	0.0472328	-0.122912	0.113258	-0.0738437	0.0030198	0.0767099	-0.0810189	0.246127	0.613039
Slc2a8	solute carrier family 2/ (facilitated glucose transporter)/ member 8 [Source:MGI Symbol;Acc:MGI:1860103]	NA	NA	0	NA	NA	NA	0	NA	NA	0	0	0	NA	281.569	255.534	323.312	292.787	253.411	208.521	336.915	303.911	0.897538	0.00248679	0.0682894	-0.0716831	0.26773	0.124652	0.133801	-0.14749	0.544705	0.395969
Slc30a7	solute carrier family 30 (zinc transporter)/ member 7 [Source:MGI Symbol;Acc:MGI:1913750]	NA	NA	0	NA	NA	NA	0	NA	NA	0	0	0	NA	3030.77	3095.49	3338.75	3492.02	3236.45	2991.52	3633.4	3475.14	0.878597	0.00407591	-0.0153228	0.0151618	0.124301	0.189056	0.0556507	-0.0578838	0.222559	0.15831
Slc35d3	solute carrier family 35/ member D3 [Source:MGI Symbol;Acc:MGI:1923407]	NA	NA	0	NA	NA	NA	0	NA	NA	0	0	0	NA	12.6566	12.6784	12.7947	13.4471	13.5551	13.1315	13.7653	16.3031	0.710287	0.0483478	-0.00124095	0.00123989	0.0144114	0.0861687	0.0227204	-0.023084	0.044917	0.289027
Slc35e3	solute carrier family 35/ member E3 [Source:MGI Symbol;Acc:MGI:2448489]	NA	NA	0	NA	NA	NA	0	NA	NA	0	0	0	NA	1073.02	1046.26	1144.27	1118.59	1125.22	1063.61	1239.49	1315.69	0.940961	0.000491959	0.0180975	-0.0183274	0.110856	0.0781012	0.0400486	-0.0411922	0.179583	0.265655
Slc35g1	solute carrier family 35/ member G1 [Source:MGI Symbol;Acc:MGI:2444789]	NA	NA	0	NA	NA	NA	0	NA	NA	0	0	0	NA	70.9703	73.521	76.4261	67.6783	55.7477	65.8156	78.1506	96.4496	0.78258	0.0216867	-0.0256949	0.0252453	0.0811557	-0.0942173	-0.124724	0.114794	0.362622	0.66614
Slc36a1	solute carrier family 36 (proton/amino acid symporter)/ member 1 [Source:MGI Symbol;Acc:MGI:2445299]	NA	NA	0	NA	NA	NA	0	NA	NA	0	0	0	NA	959.061	863.004	1069.36	977.206	959.9	872.085	1094.14	1065.03	0.844808	0.00829051	0.0741201	-0.0781353	0.231172	0.101159	0.0675481	-0.0708667	0.256384	0.217482
Slc37a1	solute carrier family 37 (glycerol-3-phosphate transporter)/ member 1 [Source:MGI Symbol;Acc:MGI:2446181]	NA	NA	0	NA	NA	NA	0	NA	NA	0	0	0	NA	2.13478	2.16087	2.14524	2.21676	2.14502	2.13134	2.25163	2.1661	0.712131	0.0475034	-0.00878946	0.00873624	-0.00173366	0.0455759	0.0046097	-0.00462448	0.0745836	0.0187163
Slc38a10	solute carrier family 38/ member 10 [Source:MGI Symbol;Acc:MGI:1919305]	NA	NA	0	NA	NA	NA	0	NA	NA	0	0	0	NA	7002.72	6134.66	6484.17	6668.96	5894.59	6033.56	6590.99	6815.16	0.721196	0.0434822	0.0923095	-0.098622	-0.0186837	0.0218562	-0.0169065	0.0167107	0.144197	0.19245
Slc39a2	solute carrier family 39 (zinc transporter)/ member 2 [Source:MGI Symbol;Acc:MGI:2684326]	NA	NA	0	NA	NA	NA	0	NA	NA	0	0	0	NA	3.82113	3.95275	3.93849	3.90188	3.8853	3.84384	4.14476	3.96481	0.763286	0.0275514	-0.0246343	0.0242207	0.0190074	0.0055353	0.00771852	-0.00776004	0.100981	0.0369439
Slc39a3	solute carrier family 39 (zinc transporter)/ member 3 [Source:MGI Symbol;Acc:MGI:2147269]	NA	NA	0	NA	NA	NA	0	NA	NA	0	0	0	NA	625.337	674.23	696.115	687.775	612.205	590.29	666.653	705.453	0.906119	0.00192567	-0.0553254	0.0532819	0.0993673	0.0819774	0.026056	-0.0265352	0.148979	0.230592
Slc39a7	solute carrier family 39 (zinc transporter)/ member 7 [Source:MGI Symbol;Acc:MGI:95909]	NA	NA	0	NA	NA	NA	0	NA	NA	0	0	0	NA	6694.02	6490.15	7052.58	6813.85	6156.75	6248.8	6938.36	7038.18	0.964911	0.000105186	0.0221382	-0.0224832	0.0974172	0.0477358	-0.0107449	0.0106654	0.16168	0.182288
Slc39a8	solute carrier family 39 (metal ion transporter)/ member 8 [Source:MGI Symbol;Acc:MGI:1914797]	NA	NA	0	NA	NA	NA	0	NA	NA	0	0	0	NA	190.881	167.236	209.782	258.458	153.11	186.101	210.981	219.078	0.73965	0.0359516	0.0922441	-0.0985474	0.22846	0.529501	-0.147616	0.133904	0.314925	0.369259
Slc41a1	solute carrier family 41/ member 1 [Source:MGI Symbol;Acc:MGI:2444823]	NA	NA	0	NA	NA	NA	0	NA	NA	0	0	0	NA	1147.99	1235.13	1413.38	1340.83	1240.06	1208.65	1462.37	1525.7	0.936761	0.000602653	-0.0537468	0.0518162	0.246295	0.17027	0.0183846	-0.018622	0.256285	0.317448
Slc43a2	solute carrier family 43/ member 2 [Source:MGI Symbol;Acc:MGI:2442746]	NA	NA	0	NA	NA	NA	0	NA	NA	0	0	0	NA	316.855	278.374	319.829	297.943	197.878	232.145	272.394	418.765	0.769147	0.0256777	0.0903774	-0.0964197	0.103854	0.00159108	-0.119803	0.110613	0.341284	0.961727
Slc48a1	solute carrier family 48 (heme transporter)/ member 1 [Source:MGI Symbol;Acc:MGI:1914989]	NA	NA	0	NA	NA	NA	0	NA	NA	0	0	0	NA	2994.5	3135.02	3572.21	3539.39	3267.53	3594.21	3880.79	4190.87	0.855816	0.00670664	-0.0334592	0.0327008	0.221042	0.207727	-0.0703737	0.0670999	0.177775	0.288674
Slc4a2	solute carrier family 4 (anion exchanger)/ member 2 [Source:MGI Symbol;Acc:MGI:109351]	NA	NA	0	NA	NA	NA	0	NA	NA	0	0	0	NA	3508.35	3207.43	3828.7	3609.83	3385.66	3340.31	3919.89	3604.25	0.783462	0.0214392	0.0632373	-0.0661368	0.189299	0.104375	0.00969553	-0.00976113	0.221072	0.0999585
Slc5a5	solute carrier family 5 (sodium iodide symporter)/ member 5 [Source:MGI Symbol;Acc:MGI:2149330]	NA	NA	0	NA	NA	NA	0	NA	NA	0	0	0	NA	8.61739	8.63377	9.19769	9.16602	8.6797	8.51309	9.63291	8.77164	0.743809	0.0343737	-0.00137071	0.0013694	0.0926507	0.0876743	0.0139132	-0.0140486	0.164239	0.029115
Slc6a8	solute carrier family 6 (neurotransmitter transporter/ creatine)/ member 8 [Source:MGI Symbol;Acc:MGI:2147834]	NA	NA	0	NA	NA	NA	0	NA	NA	0	0	0	NA	2974.87	3062.28	3138.47	3131.73	3081.18	3219.98	3320.82	3996.67	0.753193	0.030971	-0.0210411	0.0207386	0.0561975	0.0530954	-0.0321339	0.0314337	0.0759206	0.343179
Slc9a3r2	solute carrier family 9 (sodium/hydrogen exchanger)/ member 3 regulator 2 [Source:MGI Symbol;Acc:MGI:1890662]	NA	NA	0	NA	NA	NA	0	NA	NA	0	0	0	NA	1138.91	1241.06	1162.08	1291.53	1150.31	1011.92	1199	1258.31	0.711	0.0480205	-0.0632899	0.0606297	-0.0342249	0.118141	0.0895067	-0.0954293	0.149315	0.218965
Slc9a6	solute carrier family 9 (sodium/hydrogen exchanger)/ member 6 [Source:MGI Symbol;Acc:MGI:2443511]	NA	NA	0	NA	NA	NA	0	NA	NA	0	0	0	NA	1105.11	970.757	1107.1	1063.13	1040.39	984.656	1183.63	1255.53	0.856677	0.00659167	0.0904733	-0.0965288	0.0930728	0.0346014	0.0391678	-0.0402609	0.225266	0.310339
Smek2	NA	NA	NA	0	NA	NA	NA	0	NA	NA	0	0	0	NA	2859.38	2827.29	2806.17	3101.29	3001.16	2918.04	3235.31	3220.16	0.803508	0.0162809	0.00811791	-0.00816384	-0.0189805	0.125285	0.0201191	-0.0204037	0.128502	0.121729
Smim13	small integral membrane protein 13 [Source:MGI Symbol;Acc:MGI:2652854]	NA	NA	0	NA	NA	NA	0	NA	NA	0	0	0	NA	1408.23	1410.67	1326.27	1377.86	1434.87	1378.02	1639.09	1786.09	0.737394	0.0368258	-0.00124775	0.00124668	-0.0877572	-0.0327063	0.0288689	-0.0294584	0.220835	0.344747
Smox	spermine oxidase [Source:MGI Symbol;Acc:MGI:2445356]	NA	NA	0	NA	NA	NA	0	NA	NA	0	0	0	NA	387.073	384.931	463.761	500.277	411.544	319.525	509.191	738.334	0.88034	0.00390815	0.00399749	-0.0040086	0.264774	0.374119	0.171039	-0.194078	0.478199	1.01427
Smpd1	sphingomyelin phosphodiesterase 1/ acid lysosomal [Source:MGI Symbol;Acc:MGI:98325]	NA	NA	0	NA	NA	NA	0	NA	NA	0	0	0	NA	2104.24	1757.52	2060.3	2200.33	1749.94	1708.29	2045.51	2168.06	0.853354	0.00704232	0.124041	-0.135717	0.0935914	0.188461	0.0172714	-0.0174807	0.242431	0.326378
Smpd2	sphingomyelin phosphodiesterase 2/ neutral [Source:MGI Symbol;Acc:MGI:1278330]	NA	NA	0	NA	NA	NA	0	NA	NA	0	0	0	NA	432.765	386.891	418.722	451.792	414.304	355.105	445.107	433.098	0.729894	0.0398243	0.0785648	-0.0830908	0.0309728	0.140638	0.106939	-0.115505	0.210402	0.170943
Snap47	synaptosomal-associated protein/ 47 [Source:MGI Symbol;Acc:MGI:1915076]	NA	NA	0	NA	NA	NA	0	NA	NA	0	0	0	NA	2169.37	2223.32	2545.89	2580.62	2211.52	2181.26	2485.72	2509.56	0.836766	0.00958584	-0.0178271	0.0176095	0.213066	0.232616	0.00990323	-0.00997168	0.178531	0.192301
Snapc1	small nuclear RNA activating complex/ polypeptide 1 [Source:MGI Symbol;Acc:MGI:1922877]	NA	NA	0	NA	NA	NA	0	NA	NA	0	0	0	NA	583.74	562.464	595.724	631.639	594.417	578.376	632.325	674.824	0.874404	0.00449811	0.0265335	-0.0270306	0.0558516	0.140309	0.0195991	-0.019869	0.10879	0.202634
Snx16	sorting nexin 16 [Source:MGI Symbol;Acc:MGI:1921968]	NA	NA	0	NA	NA	NA	0	NA	NA	0	0	0	NA	532.256	581.357	566.654	517.541	440.253	431.551	516.55	584.165	0.748856	0.0325166	-0.0650559	0.0622484	0.0252935	-0.105503	0.0143293	-0.014473	0.244904	0.422372
Sox5	SRY (sex determining region Y)-box 5 [Source:MGI Symbol;Acc:MGI:98367]	NA	NA	0	NA	NA	NA	0	NA	NA	0	0	0	NA	146.07	130.843	192.453	198.015	128.396	118.041	170.91	191.468	0.907632	0.00183622	0.0772286	-0.0815977	0.475071	0.516176	0.0593813	-0.0619308	0.472026	0.635887
Sp6	trans-acting transcription factor 6 [Source:MGI Symbol;Acc:MGI:1932575]	NA	NA	0	NA	NA	NA	0	NA	NA	0	0	0	NA	53.3515	49.3863	66.3618	54.9655	47.9784	57.7561	61.1768	92.1458	0.762455	0.0278238	0.0546344	-0.0567851	0.369457	0.097631	-0.139989	0.127599	0.21061	0.801544
Spag9	sperm associated antigen 9 [Source:MGI Symbol;Acc:MGI:1918084]	NA	NA	0	NA	NA	NA	0	NA	NA	0	0	0	NA	10142.8	9656.12	10818.2	10303.5	10445.7	10087.6	10933.4	11899.5	0.837277	0.00949989	0.0350362	-0.0359083	0.128037	0.0577095	0.0249426	-0.0253814	0.0907829	0.212936
Spata17	spermatogenesis associated 17 [Source:MGI Symbol;Acc:MGI:1921967]	NA	NA	0	NA	NA	NA	0	NA	NA	0	0	0	NA	2.50178	2.49129	2.5244	2.53693	2.47301	2.45725	2.51783	2.55788	0.934169	0.000678482	0.00302745	-0.00303381	0.0160166	0.0231597	0.00460196	-0.00461669	0.0305187	0.0532831
Sphkap	SPHK1 interactor/ AKAP domain containing [Source:MGI Symbol;Acc:MGI:1924879]	NA	NA	0	NA	NA	NA	0	NA	NA	0	0	0	NA	26.4753	22.8208	27.7663	26.735	21.9478	23.2031	24.4372	30.118	0.759502	0.0288048	0.103173	-0.111123	0.171858	0.117254	-0.040676	0.0395605	0.114327	0.415869
Spint2	serine protease inhibitor/ Kunitz type 2 [Source:MGI Symbol;Acc:MGI:1338031]	NA	NA	0	NA	NA	NA	0	NA	NA	0	0	0	NA	105.724	159.481	172.329	168.617	164.41	134.839	195.364	223.663	0.769033	0.0257134	-0.326802	0.266275	0.378056	0.346647	0.135953	-0.15011	0.384821	0.579984
Spock2	sparc/osteonectin/ cwcv and kazal-like domains proteoglycan 2 [Source:MGI Symbol;Acc:MGI:1891351]	NA	NA	0	NA	NA	NA	0	NA	NA	0	0	0	NA	38.5467	37.3135	38.9032	40.1981	35.1108	32.6057	46.4396	38.5414	0.82684	0.0113529	0.023265	-0.0236464	0.036546	0.0837828	0.0524077	-0.0543835	0.455845	0.1869
Spred1	sprouty protein with EVH-1 domain 1/ related sequence [Source:MGI Symbol;Acc:MGI:2150016]	NA	NA	0	NA	NA	NA	0	NA	NA	0	0	0	NA	5303.03	5015.53	5852.96	6029.57	6194.25	6087.82	7079.73	9278	0.856214	0.0066534	0.0396475	-0.0407679	0.181998	0.224886	0.0124488	-0.0125572	0.205213	0.595331
Sprn	shadow of prion protein [Source:MGI Symbol;Acc:MGI:3582583]	NA	NA	0	NA	NA	NA	0	NA	NA	0	0	0	NA	4.47957	4.50025	4.58435	4.71512	4.64309	4.46422	4.75369	4.92797	0.860013	0.00615827	-0.00332574	0.00331809	0.0300324	0.0706077	0.0280604	-0.028617	0.0620236	0.113969
Sprr1a	small proline-rich protein 1A [Source:MGI Symbol;Acc:MGI:106660]	NA	NA	0	NA	NA	NA	0	NA	NA	0	0	0	NA	43.9244	48.305	55.0853	38.637	47.5741	43.9072	61.2247	90.391	0.733563	0.0383398	-0.0702028	0.0669446	0.25644	-0.255242	0.0566985	-0.0590183	0.420637	0.982702
Sprr3	small proline-rich protein 3 [Source:MGI Symbol;Acc:MGI:1330237]	NA	NA	0	NA	NA	NA	0	NA	NA	0	0	0	NA	29.4597	32.7325	33.4888	32.2285	29.0133	26.8177	29.9687	36.1828	0.747859	0.0328784	-0.0779912	0.0739904	0.106946	0.0516038	0.0556486	-0.0578815	0.102391	0.374239
Spsb3	splA/ryanodine receptor domain and SOCS box containing 3 [Source:MGI Symbol;Acc:MGI:1891471]	NA	NA	0	NA	NA	NA	0	NA	NA	0	0	0	NA	724.636	732.145	741.908	726.151	670.738	642.481	747.49	776.061	0.868429	0.00514691	-0.00745559	0.00741726	0.0265291	-0.00444299	0.0307136	-0.0313817	0.18702	0.241135
Sqstm1	sequestosome 1 [Source:MGI Symbol;Acc:MGI:107931]	NA	NA	0	NA	NA	NA	0	NA	NA	0	0	0	NA	11194.8	11463.8	13351.1	11769.6	12520.8	13041.4	13919.4	17838.1	0.77515	0.0238426	-0.0172308	0.0170274	0.236899	0.0550026	-0.0296845	0.029086	0.123081	0.480952
Srl	sarcalumenin [Source:MGI Symbol;Acc:MGI:2146620]	NA	NA	0	NA	NA	NA	0	NA	NA	0	0	0	NA	134.016	128.682	149.223	160.864	134.405	113.557	165.276	134.229	0.73038	0.0396259	0.0290038	-0.0295989	0.184063	0.29244	0.11647	-0.126705	0.414763	0.114582
St14	suppression of tumorigenicity 14 (colon carcinoma) [Source:MGI Symbol;Acc:MGI:1338881]	NA	NA	0	NA	NA	NA	0	NA	NA	0	0	0	NA	113.94	69.3401	174.841	106.409	86.1275	70.9922	177.879	112.68	0.762762	0.0277229	0.314226	-0.402291	0.931993	0.215563	0.132682	-0.146132	1.17903	0.520366
St3gal4	ST3 beta-galactoside alpha-2/3-sialyltransferase 4 [Source:MGI Symbol;Acc:MGI:1316743]	NA	NA	0	NA	NA	NA	0	NA	NA	0	0	0	NA	630.307	591.963	593.432	741.336	599.55	621.154	746.34	694.67	0.746427	0.0334026	0.0445631	-0.0459836	-0.0424087	0.278637	-0.0257603	0.0253084	0.290191	0.186687
Stac2	SH3 and cysteine rich domain 2 [Source:MGI Symbol;Acc:MGI:2144518]	NA	NA	0	NA	NA	NA	0	NA	NA	0	0	0	NA	19.4236	19.9822	20.9178	19.5861	22.1695	20.5473	22.8938	23.301	0.761743	0.0280582	-0.0205957	0.0203058	0.0863243	-0.00857852	0.0537727	-0.0558548	0.100156	0.125589
Stard3	START domain containing 3 [Source:MGI Symbol;Acc:MGI:1929618]	NA	NA	0	NA	NA	NA	0	NA	NA	0	0	0	NA	511.323	492.596	532.105	491.63	503.056	476.654	528.107	547.749	0.777478	0.0231534	0.0266641	-0.0271662	0.0841403	-0.0299998	0.0383637	-0.0394118	0.108477	0.16116
Stat5a	signal transducer and activator of transcription 5A [Source:MGI Symbol;Acc:MGI:103036]	NA	NA	0	NA	NA	NA	0	NA	NA	0	0	0	NA	588.487	572.532	620.895	699.675	570.294	583.748	668.731	630.843	0.769617	0.025531	0.0196901	-0.0199625	0.0970306	0.269366	-0.016918	0.0167219	0.212802	0.128658
Stim1	stromal interaction molecule 1 [Source:MGI Symbol;Acc:MGI:107476]	NA	NA	0	NA	NA	NA	0	NA	NA	0	0	0	NA	1102.57	963.341	1252.26	1231.72	1023.71	1021.66	1326.2	1207.51	0.872128	0.00473863	0.0940905	-0.100658	0.277753	0.253895	0.00143983	-0.00144127	0.374933	0.239671
Stk19	serine/threonine kinase 19 [Source:MGI Symbol;Acc:MGI:1860085]	NA	NA	0	NA	NA	NA	0	NA	NA	0	0	0	NA	279.696	268.872	274.554	269.121	263.041	251.34	307.41	312.966	0.831759	0.0104534	0.0281882	-0.0287499	0.00141776	-0.0274153	0.0324509	-0.0331977	0.257326	0.28317
Stk38l	serine/threonine kinase 38 like [Source:MGI Symbol;Acc:MGI:1922250]	NA	NA	0	NA	NA	NA	0	NA	NA	0	0	0	NA	1210.47	1022.98	1350.55	1070.64	875.169	974.812	1225	1253.23	0.816777	0.0133416	0.116294	-0.126497	0.274278	-0.0607901	-0.0798776	0.075686	0.405277	0.438137
Stkld1	serine/threonine kinase-like domain containing 1 [Source:MGI Symbol;Acc:MGI:2685557]	NA	NA	0	NA	NA	NA	0	NA	NA	0	0	0	NA	13.2778	12.3911	13.5428	13.1591	13.1164	12.5165	14.8716	13.5653	0.792261	0.0190659	0.0489959	-0.0507185	0.0775028	0.0360422	0.0333762	-0.0341666	0.214558	0.0819179
Stom	stomatin [Source:MGI Symbol;Acc:MGI:95403]	NA	NA	0	NA	NA	NA	0	NA	NA	0	0	0	NA	1549.38	1573.51	2287.47	2019.98	1383.2	1850.89	1919.9	2343.08	0.723193	0.0426251	-0.0111893	0.0111032	0.550872	0.371462	-0.225353	0.194862	0.247672	0.535045
Ston2	stonin 2 [Source:MGI Symbol;Acc:MGI:1918272]	NA	NA	0	NA	NA	NA	0	NA	NA	0	0	0	NA	167.053	135.03	175.122	265.283	126.124	165.996	228.916	244.327	0.824463	0.0118045	0.145364	-0.161668	0.213414	0.812586	-0.211713	0.184584	0.648258	0.742251
Stpg1	sperm tail PG rich repeat containing 1 [Source:MGI Symbol;Acc:MGI:1926056]	NA	NA	0	NA	NA	NA	0	NA	NA	0	0	0	NA	2.17222	2.15338	2.22173	2.1861	2.13311	2.15312	2.18674	2.16922	0.722432	0.0429507	0.00626997	-0.00629734	0.0387837	0.0154607	-0.00675024	0.0067188	0.0290745	0.0174673
Stra6	stimulated by retinoic acid gene 6 [Source:MGI Symbol;Acc:MGI:107742]	NA	NA	0	NA	NA	NA	0	NA	NA	0	0	0	NA	3.81047	3.72971	3.83146	3.74008	3.77932	3.71334	3.89142	3.8618	0.771318	0.0250042	0.0153701	-0.0155356	0.0232972	-0.0115312	0.0126498	-0.0127617	0.0548176	0.043794
Stx8	syntaxin 8 [Source:MGI Symbol;Acc:MGI:1890156]	NA	NA	0	NA	NA	NA	0	NA	NA	0	0	0	NA	545.747	526.938	669.79	643.823	545.783	539.434	626.185	649.401	0.813649	0.0140015	0.025078	-0.0255216	0.320554	0.26351	0.00841544	-0.00846482	0.206678	0.259199
Sugct	succinyl-CoA glutarate-CoA transferase [Source:MGI Symbol;Acc:MGI:1923221]	NA	NA	0	NA	NA	NA	0	NA	NA	0	0	0	NA	41.5527	36.5591	43.1588	42.9924	40.4572	38.8859	44.0549	44.9743	0.802314	0.0165636	0.0894025	-0.0953109	0.144115	0.138542	0.0282928	-0.0288587	0.151197	0.180996
Sumf1	sulfatase modifying factor 1 [Source:MGI Symbol;Acc:MGI:1889844]	NA	NA	0	NA	NA	NA	0	NA	NA	0	0	0	NA	2353.78	2202.83	2836.66	3056.5	2327.21	2194.59	2771.18	2757.34	0.795289	0.0182888	0.047021	-0.0486053	0.316233	0.423918	0.0417016	-0.0429429	0.293606	0.286378
Suox	sulfite oxidase [Source:MGI Symbol;Acc:MGI:2446117]	NA	NA	0	NA	NA	NA	0	NA	NA	0	0	0	NA	446.014	421.386	432.67	455.392	390.836	436.842	457.724	571.947	0.74305	0.0346584	0.0403917	-0.0415552	-0.00342941	0.0704122	-0.0825064	0.0780421	0.145408	0.466811
Susd1	sushi domain containing 1 [Source:MGI Symbol;Acc:MGI:3651543]	NA	NA	0	NA	NA	NA	0	NA	NA	0	0	0	NA	22.1235	21.8737	26.1621	24.3335	21.177	19.8304	22.4623	22.6169	0.7113	0.0478829	0.00816785	-0.00821436	0.250065	0.145534	0.046612	-0.0481684	0.131625	0.14152
Svop	SV2 related protein [Source:MGI Symbol;Acc:MGI:1915916]	NA	NA	0	NA	NA	NA	0	NA	NA	0	0	0	NA	165.516	76.5346	262.578	198.728	86.5545	86.808	148.868	146.094	0.70701	0.0498704	0.451664	-0.661128	1.11743	0.715487	-0.00211131	0.00210822	0.780243	0.753108
Syn1	synapsin I [Source:MGI Symbol;Acc:MGI:98460]	NA	NA	0	NA	NA	NA	0	NA	NA	0	0	0	NA	298.498	272.467	317.869	249.086	333.724	337.388	410.086	500.318	0.721206	0.0434778	0.0643198	-0.0673218	0.155032	-0.196754	-0.00789779	0.00785479	0.289371	0.576291
Syt1	synaptotagmin I [Source:MGI Symbol;Acc:MGI:99667]	NA	NA	0	NA	NA	NA	0	NA	NA	0	0	0	NA	20.6307	21.9746	22.2444	24.2979	22.1998	19.6158	22.9285	23.9399	0.746801	0.0332651	-0.0462397	0.0448036	0.0624068	0.189795	0.0865056	-0.0920253	0.133102	0.195376
Syt11	synaptotagmin XI [Source:MGI Symbol;Acc:MGI:1859547]	NA	NA	0	NA	NA	NA	0	NA	NA	0	0	0	NA	1086.29	691.568	1066.8	1222.59	948.451	666.342	1481.95	994.615	0.711625	0.0477344	0.289271	-0.3622	0.263152	0.459803	0.232296	-0.277015	0.876144	0.300861
T2	brachyury 2 [Source:MGI Symbol;Acc:MGI:104658]	NA	NA	0	NA	NA	NA	0	NA	NA	0	0	0	NA	3.61023	3.62537	3.66352	3.65776	3.58939	3.6061	3.74498	3.68805	0.944379	0.000412443	-0.00302196	0.00301564	0.0181182	0.0158468	-0.00335546	0.00334768	0.0578657	0.0357661
Taok3	TAO kinase 3 [Source:MGI Symbol;Acc:MGI:3041177]	NA	NA	0	NA	NA	NA	0	NA	NA	0	0	0	NA	2602.82	2200.57	2534.51	2620.66	2317.8	2474.5	2679.67	2694.33	0.730096	0.0397418	0.116021	-0.126174	0.0776557	0.125876	-0.0479601	0.0464169	0.161338	0.169211
Tbc1d16	TBC1 domain family/ member 16 [Source:MGI Symbol;Acc:MGI:2652878]	NA	NA	0	NA	NA	NA	0	NA	NA	0	0	0	NA	1236.57	1416.48	1695.19	1706.36	1407.9	1184.67	1577.63	1541.28	0.717912	0.0449145	-0.10131	0.0946604	0.353794	0.363269	0.119161	-0.129897	0.28338	0.249751
Tbc1d2	TBC1 domain family/ member 2 [Source:MGI Symbol;Acc:MGI:2652885]	NA	NA	0	NA	NA	NA	0	NA	NA	0	0	0	NA	1132.7	997.048	1502.85	1248.38	893.146	1082.48	1395.18	1215.75	0.794572	0.0184709	0.0890851	-0.0949502	0.497018	0.22937	-0.145341	0.13203	0.498138	0.299535
Tbc1d22a	TBC1 domain family/ member 22a [Source:MGI Symbol;Acc:MGI:1289265]	NA	NA	0	NA	NA	NA	0	NA	NA	0	0	0	NA	757.882	738.125	829.865	873.968	743.1	677.054	800.501	789.409	0.782629	0.0216728	0.0189286	-0.0191803	0.149831	0.224535	0.0655812	-0.0687049	0.172927	0.152798
Tbc1d23	TBC1 domain family/ member 23 [Source:MGI Symbol;Acc:MGI:1914831]	NA	NA	0	NA	NA	NA	0	NA	NA	0	0	0	NA	1659.6	1688.45	1776.45	1781.67	1599.17	1662.67	1787.06	1712.38	0.856741	0.00658324	-0.0124841	0.012377	0.0856776	0.0899063	-0.0283623	0.0278155	0.1319	0.070316
Tbc1d9b	TBC1 domain family/ member 9B [Source:MGI Symbol;Acc:MGI:1924045]	NA	NA	0	NA	NA	NA	0	NA	NA	0	0	0	NA	4096.88	3940.96	4181.88	4376.95	3767.5	3800.55	4117.72	4048.77	0.870778	0.00488518	0.0277177	-0.0282607	0.0573456	0.123118	-0.00631396	0.00628645	0.121924	0.0975609
Tbx2	T-box 2 [Source:MGI Symbol;Acc:MGI:98494]	NA	NA	0	NA	NA	NA	0	NA	NA	0	0	0	NA	253.737	229.379	266.706	257.803	194.743	242.346	240.305	309.026	0.717992	0.0448789	0.0709654	-0.0746376	0.142881	0.0939008	-0.166355	0.149141	0.136939	0.4998
Tcaf2	TRPM8 channel-associated factor 2 [Source:MGI Symbol;Acc:MGI:2385258]	NA	NA	0	NA	NA	NA	0	NA	NA	0	0	0	NA	710.395	709.339	778.993	758.655	497.171	766.244	785.596	975.425	0.72956	0.0399613	0.00107342	-0.00107422	0.134062	0.0958951	-0.345515	0.278547	0.314531	0.626775
Tcam1	testicular cell adhesion molecule 1 [Source:MGI Symbol;Acc:MGI:1923120]	NA	NA	0	NA	NA	NA	0	NA	NA	0	0	0	NA	6.33873	6.2639	6.37184	6.21676	6.12551	5.98061	6.31669	6.22056	0.719028	0.0444247	0.00854009	-0.00859095	0.0160571	-0.019491	0.0171651	-0.0173717	0.0615045	0.0393781
Tcap	titin-cap [Source:MGI Symbol;Acc:MGI:1330233]	NA	NA	0	NA	NA	NA	0	NA	NA	0	0	0	NA	1.61886	1.62379	1.6276	1.62988	1.62744	1.61689	1.72085	1.64331	0.730673	0.0395063	-0.00219251	0.00218919	0.00557084	0.00758798	0.00468566	-0.00470093	0.0852002	0.0186846
Tcf7l2	transcription factor 7 like 2/ T cell specific/ HMG box [Source:MGI Symbol;Acc:MGI:1202879]	COADREAD	tsg	1	colorectal	oncogene_fusion	T	1	COREAD_UCEC	Act	1	1	0	NA	2339.08	2107.01	2447	2758.3	2503	2222.69	2865.11	2621.3	0.725913	0.0414743	0.0734044	-0.0773403	0.138477	0.311244	0.0831338	-0.0882188	0.278067	0.149759
Tchh	trichohyalin [Source:MGI Symbol;Acc:MGI:2177944]	NA	NA	0	NA	NA	NA	0	NA	NA	0	0	0	NA	66.0714	71.5877	89.3942	104.446	75.9598	66.4262	113.219	120.844	0.950792	0.000286998	-0.0590025	0.056684	0.377153	0.601661	0.0935005	-0.0999828	0.669304	0.763343
Tcp11l2	t-complex 11 (mouse) like 2 [Source:MGI Symbol;Acc:MGI:2444679]	NA	NA	0	NA	NA	NA	0	NA	NA	0	0	0	NA	344.984	366.426	433.357	470.901	389.64	278.654	445.134	691.34	0.833307	0.0101801	-0.0441511	0.04284	0.284872	0.404742	0.22166	-0.262009	0.413757	1.04891
Tctn2	tectonic family member 2 [Source:NCBI gene (formerly Entrezgene);Acc:67978]	NA	NA	0	NA	NA	NA	0	NA	NA	0	0	0	NA	276.473	235.729	267.26	295.416	245.658	221.278	307.158	268.133	0.802521	0.0165143	0.110424	-0.119582	0.061531	0.206036	0.0734247	-0.0773629	0.395757	0.199723
Tecpr1	tectonin beta-propeller repeat containing 1 [Source:MGI Symbol;Acc:MGI:1917631]	NA	NA	0	NA	NA	NA	0	NA	NA	0	0	0	NA	881.094	817.074	1000.07	989.278	918.368	833.731	1040.67	997.545	0.821185	0.0124455	0.0533893	-0.0554412	0.236125	0.220469	0.0680598	-0.0714302	0.248431	0.18737
Tecta	tectorin alpha [Source:MGI Symbol;Acc:MGI:109575]	NA	NA	0	NA	NA	NA	0	NA	NA	0	0	0	NA	13.0513	12.5489	14.0921	13.6319	13.3173	13.5371	15.293	14.3429	0.867264	0.00528003	0.0280399	-0.0285957	0.138735	0.0908328	-0.0118538	0.0117572	0.187709	0.0951802
Tef	thyrotroph embryonic factor [Source:MGI Symbol;Acc:MGI:98663]	NA	NA	0	NA	NA	NA	0	NA	NA	0	0	0	NA	1522.45	1639.43	1804.06	1953.07	1406.71	1542.36	1821.99	1815.01	0.896197	0.002583	-0.0543901	0.0524139	0.190469	0.304961	-0.0679358	0.0648801	0.305256	0.299717
Terf2ip	telomeric repeat binding factor 2/ interacting protein [Source:MGI Symbol;Acc:MGI:1929871]	NA	NA	0	NA	NA	NA	0	NA	NA	0	0	0	NA	586.962	526.622	601.171	652.274	560.271	540.004	612.174	698.167	0.829625	0.0108378	0.0761288	-0.0803709	0.110638	0.22834	0.0263329	-0.0268225	0.154151	0.34378
Tex15	testis expressed gene 15 [Source:MGI Symbol;Acc:MGI:1934816]	NA	NA	0	NA	NA	NA	0	NA	NA	0	0	0	NA	328.765	240.025	434.883	328.657	198.085	224.435	425.065	267	0.778546	0.0228416	0.209162	-0.244713	0.612731	0.208686	-0.0928986	0.0872768	1.00866	0.337818
Tex29	testis expressed 29 [Source:MGI Symbol;Acc:MGI:1922778]	NA	NA	0	NA	NA	NA	0	NA	NA	0	0	0	NA	3.22928	3.23304	3.41687	3.29913	3.28537	3.22138	3.45433	3.32632	0.759241	0.0288923	-0.000840265	0.000839776	0.0806215	0.0300342	0.0141197	-0.0142592	0.0864693	0.0319886
Tfcp2	transcription factor CP2 [Source:MGI Symbol;Acc:MGI:98509]	NA	NA	0	NA	NA	NA	0	NA	NA	0	0	0	NA	683.92	592.557	757.784	741.031	647.202	584.143	799.74	667.248	0.735966	0.0373859	0.0997317	-0.107141	0.24769	0.215438	0.0720528	-0.0758414	0.377367	0.11606
Tfcp2l1	transcription factor CP2-like 1 [Source:MGI Symbol;Acc:MGI:2444691]	NA	NA	0	NA	NA	NA	0	NA	NA	0	0	0	NA	11.0439	10.8068	12.6968	11.721	10.9246	10.6186	12.2351	11.4818	0.759822	0.0286974	0.0155676	-0.0157374	0.216791	0.101414	0.0203477	-0.0206388	0.183798	0.0921118
Tgfbi	transforming growth factor/ beta induced [Source:MGI Symbol;Acc:MGI:99959]	NA	NA	0	NA	NA	NA	0	NA	NA	0	0	0	NA	2421.73	1350.32	2714.89	3616.06	1489.45	1034.4	2195.93	2153.73	0.766472	0.0265229	0.360689	-0.482048	0.525545	0.93907	0.239156	-0.286836	0.799205	0.77121
Tgfbr2	transforming growth factor/ beta receptor II [Source:MGI Symbol;Acc:MGI:98729]	CESC_PAAD_HNSC_PANCAN	tsg	1	headandneck_colorectal	TSG	Mis_F_N	1	CESC_CH_COREAD_ESCA_HNSC_PAAD	LoF	1	1	0	NA	6050.08	5806.99	9902.29	12103.3	6877.21	5695.9	10192.8	8700.49	0.718446	0.0446797	0.0292779	-0.0298844	0.740087	1.02965	0.129554	-0.142346	0.697204	0.468826
Tgoln1	trans-golgi network protein [Source:MGI Symbol;Acc:MGI:105080]	NA	NA	0	NA	NA	NA	0	NA	NA	0	0	0	NA	2239.52	1913.23	2987.58	2537.89	2103.57	2383.49	2643.7	3373.49	0.772011	0.0247916	0.109121	-0.118055	0.52491	0.289566	-0.0929298	0.0873043	0.236785	0.588471
Thbd	thrombomodulin [Source:MGI Symbol;Acc:MGI:98736]	NA	NA	0	NA	NA	NA	0	NA	NA	0	0	0	NA	5622.84	5197.09	7103.81	6567.83	3806.58	4826.44	5217.79	8326.27	0.799589	0.0172199	0.055679	-0.0579144	0.392974	0.279799	-0.181371	0.161095	0.273573	0.947804
Thbs4	thrombospondin 4 [Source:MGI Symbol;Acc:MGI:1101779]	NA	NA	0	NA	NA	NA	0	NA	NA	0	0	0	NA	6.94141	7.0466	7.40486	7.29707	6.97294	6.85159	7.07658	8.05866	0.744414	0.0341478	-0.0108905	0.0108089	0.0823539	0.0611994	0.012608	-0.0127192	0.0338933	0.221381
Tiam1	T cell lymphoma invasion and metastasis 1 [Source:MGI Symbol;Acc:MGI:103306]	NA	NA	0	NA	NA	NA	0	NA	NA	0	0	0	NA	1618.96	1298.12	1438.19	1570.51	1411.84	1407.96	1743.39	1704.9	0.766275	0.0265859	0.150541	-0.1681	-0.0202713	0.106704	0.00198303	-0.00198576	0.306296	0.274088
Ticam1	toll-like receptor adaptor molecule 1 [Source:MGI Symbol;Acc:MGI:2147032]	NA	NA	0	NA	NA	NA	0	NA	NA	0	0	0	NA	734.916	685.925	718.37	743.486	625.003	722.151	741.12	799.79	0.743103	0.0346384	0.0489058	-0.050622	0.0160545	0.065632	-0.107979	0.100457	0.137865	0.247779
Timp2	tissue inhibitor of metalloproteinase 2 [Source:MGI Symbol;Acc:MGI:98753]	NA	NA	0	NA	NA	NA	0	NA	NA	0	0	0	NA	55700.9	49158.1	70532.9	63940.4	47971	56928.8	58772.9	74062.8	0.728213	0.0405162	0.0873216	-0.0929493	0.427917	0.28635	-0.128779	0.11822	0.164211	0.497809
Timp3	tissue inhibitor of metalloproteinase 3 [Source:MGI Symbol;Acc:MGI:98754]	NA	NA	0	NA	NA	NA	0	NA	NA	0	0	0	NA	69984.5	56626.8	78567.5	95485.9	48086.9	64887.4	93268.6	145756	0.890363	0.00302965	0.144702	-0.16085	0.311598	0.592954	-0.23228	0.200016	0.723468	1.36757
Tk2	thymidine kinase 2/ mitochondrial [Source:MGI Symbol;Acc:MGI:1913266]	NA	NA	0	NA	NA	NA	0	NA	NA	0	0	0	NA	429.408	474.076	513.433	585.146	443.392	445.4	499.861	524.445	0.710319	0.0483331	-0.07315	0.0696193	0.184677	0.373297	-0.00326356	0.0032562	0.16968	0.238946
Tkfc	triokinase/ FMN cyclase [Source:MGI Symbol;Acc:MGI:2385084]	NA	NA	0	NA	NA	NA	0	NA	NA	0	0	0	NA	443.609	459.706	512.835	527.504	466.547	439.943	525.002	498.478	0.807395	0.0153816	-0.0259404	0.0254822	0.183267	0.223955	0.041732	-0.0429752	0.212032	0.137241
Tlcd2	TLC domain containing 2 [Source:MGI Symbol;Acc:MGI:1917141]	NA	NA	0	NA	NA	NA	0	NA	NA	0	0	0	NA	121.486	121.47	127.915	146.472	139.788	141.548	165.98	182.535	0.905442	0.00196662	9.37582e-05	-9.37643e-05	0.0744979	0.269929	-0.0090569	0.0090004	0.238711	0.375882
Tlr5	toll-like receptor 5 [Source:MGI Symbol;Acc:MGI:1858171]	NA	NA	0	NA	NA	NA	0	NA	NA	0	0	0	NA	63.0758	66.8303	74.4454	79.014	64.3446	68.1548	92.071	74.4857	0.837469	0.00946783	-0.0423101	0.0411046	0.196785	0.28271	-0.0420943	0.0409008	0.474834	0.16905
Tm9sf4	transmembrane 9 superfamily member 4 [Source:MGI Symbol;Acc:MGI:2139220]	NA	NA	0	NA	NA	NA	0	NA	NA	0	0	0	NA	3718.99	3250.11	4035.73	4078.56	3373.47	3270.48	4016.5	4039.03	0.894773	0.00268779	0.0939371	-0.100482	0.211858	0.227086	0.0221906	-0.0225373	0.273896	0.281968
Tmem127	transmembrane protein 127 [Source:MGI Symbol;Acc:MGI:1916720]	NA	NA	0		TSG	F_N	1	NA	NA	0	1	0	NA	4047.48	4066.52	5040.91	5334.36	4059.69	4335.22	4851.5	5366.6	0.791023	0.0193892	-0.00338904	0.0033811	0.31327	0.394902	-0.0481461	0.0465911	0.208916	0.354494
Tmem151b	transmembrane protein 151B [Source:MGI Symbol;Acc:MGI:2685169]	NA	NA	0	NA	NA	NA	0	NA	NA	0	0	0	NA	33.4959	30.0315	37.6989	35.9202	31.3465	28.5888	44.3036	45.0892	0.965211	0.00010253	0.0766045	-0.0809013	0.247146	0.177416	0.0648975	-0.0679549	0.564015	0.589376
Tmem158	transmembrane protein 158 [Source:MGI Symbol;Acc:MGI:1919559]	NA	NA	0	NA	NA	NA	0	NA	NA	0	0	0	NA	93.9993	86.1616	78.9607	132.065	101.551	83.5439	144.081	131.051	0.741675	0.0351781	0.0614365	-0.0641695	-0.190079	0.551965	0.133937	-0.147656	0.638622	0.501867
Tmem159	transmembrane protein 159 [Source:MGI Symbol;Acc:MGI:1925752]	NA	NA	0	NA	NA	NA	0	NA	NA	0	0	0	NA	739.082	706.72	763.778	752.227	637.436	765.217	790.663	933.529	0.7717	0.0248869	0.0319361	-0.0326591	0.0793556	0.057371	-0.137806	0.125783	0.172976	0.412609
Tmem167b	transmembrane protein 167B [Source:MGI Symbol;Acc:MGI:1914745]	NA	NA	0	NA	NA	NA	0	NA	NA	0	0	0	NA	2379.43	2317.79	2576.81	2824.78	2381.23	2263.31	2627.45	2799.15	0.860871	0.00604982	0.0188109	-0.0190594	0.13378	0.266334	0.0361727	-0.0371031	0.178126	0.269454
Tmem170b	transmembrane protein 170B [Source:MGI Symbol;Acc:MGI:3647046]	NA	NA	0	NA	NA	NA	0	NA	NA	0	0	0	NA	481.761	536.108	677.932	601.863	608.352	498.604	724.743	705.168	0.830061	0.0107587	-0.0791617	0.0750431	0.413661	0.241956	0.136381	-0.150632	0.388943	0.34944
Tmem178b	transmembrane protein 178B [Source:MGI Symbol;Acc:MGI:3647581]	NA	NA	0	NA	NA	NA	0	NA	NA	0	0	0	NA	1.18553	1.1839	1.20056	1.20357	1.19229	1.18447	1.2038	1.21343	0.894131	0.00273599	0.000989548	-0.000990227	0.0191698	0.0227817	0.00473866	-0.00475428	0.0186024	0.0300941
Tmem18	transmembrane protein 18 [Source:MGI Symbol;Acc:MGI:2387176]	NA	NA	0	NA	NA	NA	0	NA	NA	0	0	0	NA	693.873	738.093	800.273	863.798	673.567	704.593	867.286	920.116	0.959823	0.000157288	-0.0452538	0.0438774	0.160568	0.27077	-0.0328502	0.0321188	0.331836	0.417144
Tmem184a	transmembrane protein 184a [Source:MGI Symbol;Acc:MGI:2385897]	NA	NA	0	NA	NA	NA	0	NA	NA	0	0	0	NA	18.1123	18.2495	19.0958	16.7218	17.6824	17.6512	20.5025	20.0365	0.711692	0.0477036	-0.00545423	0.00543368	0.0708264	-0.120693	0.00127539	-0.00127652	0.214759	0.18159
Tmem203	transmembrane protein 203 [Source:MGI Symbol;Acc:MGI:2443597]	NA	NA	0	NA	NA	NA	0	NA	NA	0	0	0	NA	233.177	217.753	247.064	237.907	209.039	225.103	277.145	266.847	0.939096	0.000539293	0.0485229	-0.0502119	0.13198	0.0774967	-0.0543973	0.0524206	0.352472	0.297847
Tmem205	transmembrane protein 205 [Source:MGI Symbol;Acc:MGI:3045495]	NA	NA	0	NA	NA	NA	0	NA	NA	0	0	0	NA	204.357	240.56	297.314	293.095	231.431	214.514	265.998	274.177	0.714995	0.0462099	-0.122444	0.11286	0.418453	0.397836	0.0537163	-0.0557939	0.254549	0.298243
Tmem232	transmembrane protein 232 [Source:MGI Symbol;Acc:MGI:2685786]	NA	NA	0	NA	NA	NA	0	NA	NA	0	0	0	NA	2.13486	2.16095	2.18923	2.14846	2.13049	2.16897	2.23481	2.18352	0.761082	0.0282774	-0.00878649	0.00873331	0.0274909	0.000376169	-0.0129695	0.0128539	0.0559971	0.022504
Tmem260	transmembrane protein 260 [Source:MGI Symbol;Acc:MGI:2443219]	NA	NA	0	NA	NA	NA	0	NA	NA	0	0	0	NA	1035.8	966.951	1294.81	1311.63	1081.47	922.25	1297.88	1175.96	0.763002	0.0276442	0.048762	-0.0504679	0.370758	0.389375	0.110313	-0.119452	0.37348	0.231162
Tmem30b	transmembrane protein 30B [Source:MGI Symbol;Acc:MGI:2442082]	NA	NA	0	NA	NA	NA	0	NA	NA	0	0	0	NA	25.7673	27.1672	29.5947	34.0191	27.2601	26.9538	31.6614	34.6541	0.848397	0.00775051	-0.0386672	0.0376578	0.161128	0.362136	0.00812782	-0.00817387	0.224062	0.354362
Tmem35	NA	NA	NA	0	NA	NA	NA	0	NA	NA	0	0	0	NA	152.021	119.678	148.213	207.142	119.023	94.7256	182.468	130.357	0.735062	0.0377428	0.16226	-0.18285	0.125663	0.608606	0.155323	-0.174086	0.771733	0.28656
Tmem53	transmembrane protein 53 [Source:MGI Symbol;Acc:MGI:1916027]	NA	NA	0	NA	NA	NA	0	NA	NA	0	0	0	NA	138.785	138.541	152.228	159.858	135.957	151.816	169.709	155.386	0.774722	0.0239705	0.00127087	-0.00127199	0.134651	0.20521	-0.0817793	0.0773912	0.238128	0.110925
Tmem57	NA	NA	NA	0	NA	NA	NA	0	NA	NA	0	0	0	NA	2452.34	2455.8	2609.54	2474.33	2328.02	2418.12	2619.75	2715.83	0.910669	0.00166488	-0.0010186	0.00101788	0.0886187	0.011862	-0.0276494	0.0271294	0.142677	0.194637
Tmem79	transmembrane protein 79 [Source:MGI Symbol;Acc:MGI:1919163]	NA	NA	0	NA	NA	NA	0	NA	NA	0	0	0	NA	60.8547	63.8078	69.6845	60.6587	62.8787	62.2378	67.2744	76.005	0.739018	0.0361953	-0.0345866	0.0337768	0.160881	-0.0392414	0.00737145	-0.00740931	0.104858	0.280894
Tmem87b	transmembrane protein 87B [Source:MGI Symbol;Acc:MGI:1919727]	NA	NA	0	NA	NA	NA	0	NA	NA	0	0	0	NA	1651.27	1403.9	1965.59	1605.83	1666.51	1425.01	1999.91	1860.68	0.769807	0.0254719	0.112322	-0.121811	0.363711	0.0720713	0.108511	-0.117342	0.371621	0.267516
Tmem8b	transmembrane protein 8B [Source:MGI Symbol;Acc:MGI:2441680]	NA	NA	0	NA	NA	NA	0	NA	NA	0	0	0	NA	243.034	204.361	278.986	285.114	234.6	185.629	301.186	267.109	0.837416	0.00947661	0.119607	-0.130427	0.318643	0.349988	0.159028	-0.178754	0.519479	0.346255
Tmem9	transmembrane protein 9 [Source:MGI Symbol;Acc:MGI:1913491]	NA	NA	0	NA	NA	NA	0	NA	NA	0	0	0	NA	854.764	817.489	915.181	1105.69	803.593	779.608	973.033	917.543	0.775316	0.0237931	0.0318049	-0.0325219	0.130336	0.403152	0.0216916	-0.0220228	0.297716	0.213003
Tmem95	transmembrane protein 95 [Source:MGI Symbol;Acc:MGI:3779488]	NA	NA	0	NA	NA	NA	0	NA	NA	0	0	0	NA	17.5837	18.0527	17.2526	19.3692	19.4	16.6831	20.0572	22.8923	0.727477	0.0408213	-0.019114	0.0188641	-0.0465385	0.120413	0.104732	-0.112934	0.152795	0.343539
Tmem9b	TMEM9 domain family/ member B [Source:MGI Symbol;Acc:MGI:1915254]	NA	NA	0	NA	NA	NA	0	NA	NA	0	0	0	NA	1205.65	1119.7	1277.85	1255.66	1124.91	1174.82	1229.84	1329.64	0.821045	0.0124733	0.0523616	-0.0543338	0.136273	0.111001	-0.031657	0.0309773	0.0970123	0.209576
Tmtc1	transmembrane and tetratricopeptide repeat containing 1 [Source:MGI Symbol;Acc:MGI:3039590]	NA	NA	0	NA	NA	NA	0	NA	NA	0	0	0	NA	637.799	513.347	791.341	707.959	451.908	351.766	562.892	550.047	0.82935	0.0108881	0.148103	-0.165064	0.4593	0.298666	0.169419	-0.191995	0.486246	0.452943
Tmub2	transmembrane and ubiquitin-like domain containing 2 [Source:MGI Symbol;Acc:MGI:1919303]	NA	NA	0	NA	NA	NA	0	NA	NA	0	0	0	NA	766.476	760.084	935.901	968.221	821.85	734.07	1015.78	907.947	0.83279	0.0102709	0.00602843	-0.00605373	0.294143	0.343124	0.0791786	-0.0837777	0.384816	0.222913
Tmx2	thioredoxin-related transmembrane protein 2 [Source:MGI Symbol;Acc:MGI:1914208]	NA	NA	0	NA	NA	NA	0	NA	NA	0	0	0	NA	1027.46	1060.24	1461.38	1360.54	1125.86	1106.73	1428.97	1429.53	0.828999	0.0109523	-0.0228338	0.0224781	0.485415	0.382268	0.0123099	-0.0124158	0.356263	0.35683
Tnfrsf21	tumor necrosis factor receptor superfamily/ member 21 [Source:MGI Symbol;Acc:MGI:2151075]	NA	NA	0	NA	NA	NA	0	NA	NA	0	0	0	NA	483.812	451.938	623.411	558.965	463.265	492.054	575.91	549.263	0.728981	0.0401992	0.0483229	-0.0499977	0.41406	0.256634	-0.0441445	0.0428337	0.269861	0.201514
Tnn	tenascin N [Source:MGI Symbol;Acc:MGI:2665790]	NA	NA	0	NA	NA	NA	0	NA	NA	0	0	0	NA	700.466	816.172	624.128	834.09	342.531	387.699	619.829	616.799	0.775876	0.0236262	-0.11449	0.106068	-0.280963	0.137399	-0.0921166	0.0865863	0.763521	0.756451
Tom1l2	target of myb1-like 2 (chicken) [Source:MGI Symbol;Acc:MGI:2443306]	NA	NA	0	NA	NA	NA	0	NA	NA	0	0	0	NA	2743.55	2398.82	3338.89	3174.24	2444.02	2424.17	3202.83	3010.32	0.868965	0.0050864	0.0936102	-0.100108	0.376936	0.303977	0.00587017	-0.00589415	0.395965	0.306534
Tpcn1	two pore channel 1 [Source:MGI Symbol;Acc:MGI:2182472]	NA	NA	0	NA	NA	NA	0	NA	NA	0	0	0	NA	1970.48	1931.8	2451.39	2474.65	2001.89	2117.77	2486.74	2499.71	0.828414	0.0110599	0.014231	-0.0143727	0.329286	0.34291	-0.0411617	0.0400198	0.271731	0.279232
Tradd	TNFRSF1A-associated via death domain [Source:MGI Symbol;Acc:MGI:109200]	NA	NA	0	NA	NA	NA	0	NA	NA	0	0	0	NA	341.261	340.56	344.021	372.521	331.951	317.115	343.653	372.58	0.798408	0.0175095	0.00148439	-0.00148592	0.0131031	0.127927	0.0326058	-0.0333597	0.0825861	0.199186
Trappc11	trafficking protein particle complex 11 [Source:MGI Symbol;Acc:MGI:2444585]	NA	NA	0	NA	NA	NA	0	NA	NA	0	0	0	NA	1693.08	1672.11	1856.32	1771.82	1751.29	1685.77	1898.07	1796.24	0.776951	0.0233084	0.00896365	-0.00901969	0.141762	0.0745464	0.027244	-0.0277684	0.143363	0.0638071
Trappc12	trafficking protein particle complex 12 [Source:MGI Symbol;Acc:MGI:2445089]	NA	NA	0	NA	NA	NA	0	NA	NA	0	0	0	NA	922.593	959.979	982.3	1009.78	883.314	870.401	1037.92	937.084	0.862454	0.00585286	-0.028939	0.0283699	0.0615312	0.101335	0.0105841	-0.0106623	0.243275	0.0958355
Trappc9	trafficking protein particle complex 9 [Source:MGI Symbol;Acc:MGI:1923760]	NA	NA	0	NA	NA	NA	0	NA	NA	0	0	0	NA	1267.01	1175.75	1493.46	1467.76	1252.55	1187.08	1473.99	1412.35	0.827067	0.0113103	0.0529179	-0.0549331	0.290147	0.265104	0.0382035	-0.0392427	0.273062	0.211432
Trim9	tripartite motif-containing 9 [Source:MGI Symbol;Acc:MGI:2137354]	NA	NA	0	NA	NA	NA	0	NA	NA	0	0	0	NA	18.2899	18.5541	20.2537	23.7036	19.6142	18.8956	23.1241	21.6527	0.754703	0.0304438	-0.0103841	0.0103099	0.136758	0.363673	0.0266709	-0.0271732	0.26417	0.169322
Trip12	thyroid hormone receptor interactor 12 [Source:MGI Symbol;Acc:MGI:1309481]	NA	NA	0	NA	NA	NA	0	NA	NA	0	0	0	NA	18004.3	17513	19130.7	19090.3	18004.5	18691.5	19455.4	20762.2	0.864047	0.00565898	0.0198193	-0.0200953	0.107368	0.104318	-0.0272652	0.0267594	0.0845491	0.178334
Trnp1	TMF1-regulated nuclear protein 1 [Source:MGI Symbol;Acc:MGI:1916789]	NA	NA	0	NA	NA	NA	0	NA	NA	0	0	0	NA	630.52	596.366	735.19	739.635	643.243	616.576	742.655	686.853	0.726383	0.0412775	0.0396122	-0.0407306	0.261188	0.269884	0.0302191	-0.0308656	0.237548	0.124856
Trp53i11	transformation related protein 53 inducible protein 11 [Source:MGI Symbol;Acc:MGI:2670995]	NA	NA	0	NA	NA	NA	0	NA	NA	0	0	0	NA	395.845	341.926	491.13	482.123	392.759	360.514	531.488	495.725	0.892714	0.00284418	0.101762	-0.109489	0.412931	0.386227	0.0604715	-0.0631176	0.496865	0.396369
Trpc3	transient receptor potential cation channel/ subfamily C/ member 3 [Source:MGI Symbol;Acc:MGI:109526]	NA	NA	0	NA	NA	NA	0	NA	NA	0	0	0	NA	23.3983	24.4526	29.2884	23.4712	30.3906	27.2358	34.1229	33.6344	0.735057	0.0377448	-0.0321431	0.0314425	0.291785	-0.0276499	0.0768959	-0.0812264	0.244011	0.223209
Tsc2	TSC complex subunit 2 [Source:MGI Symbol;Acc:MGI:102548]	LIHC	tsg	1	pulmonarylymphangioleiomyomatosis(LAM)_renalangiomyolipoma_HNSCC	TSG	D_Mis_N_F_S	1	ACY_BLCA_HC_PAIS_RCH_SSCC	LoF	1	1	0	NA	3377.9	3243.61	3654.87	4016.4	3412.69	3393.8	3912.2	3950.35	0.848661	0.00771162	0.0289677	-0.0295612	0.142658	0.278744	0.00399879	-0.00400991	0.201069	0.21507
Tsc22d1	TSC22 domain family/ member 1 [Source:MGI Symbol;Acc:MGI:109127]	NA	NA	0	NA	NA	NA	0	NA	NA	0	0	0	NA	6719.07	6679.26	8412.57	8510.37	7750.18	7521.08	8368.05	9859.72	0.741057	0.035413	0.00427973	-0.00429247	0.328566	0.345242	0.0214824	-0.0218072	0.132144	0.368799
Tsc22d4	TSC22 domain family/ member 4 [Source:MGI Symbol;Acc:MGI:1926079]	NA	NA	0	NA	NA	NA	0	NA	NA	0	0	0	NA	1867.45	1754.3	1862.71	1953.17	1750.52	1821.3	2021.67	2086.91	0.917766	0.0013059	0.044381	-0.0457897	0.0407152	0.109135	-0.028876	0.0283094	0.178891	0.22471
Tshr	thyroid stimulating hormone receptor [Source:MGI Symbol;Acc:MGI:98849]	NA	NA	0	toxicthyroidadenoma	oncogene	Mis	1	NA	NA	0	1	0	NA	89.3998	62.5163	113.89	79.7282	55.7468	64.2322	103.104	81.5783	0.783102	0.02154	0.235069	-0.280971	0.584372	0.0698877	-0.10582	0.0985862	0.781322	0.443477
Tshz3	teashirt zinc finger family member 3 [Source:MGI Symbol;Acc:MGI:2442819]	NA	NA	0	NA	NA	NA	0	NA	NA	0	0	0	NA	1125.92	939.477	1069.5	1028.05	1325.62	1334.8	1490.44	1638.73	0.729682	0.0399113	0.124683	-0.136487	0.0505148	-0.00650137	-0.00498392	0.00496676	0.16408	0.300919
Tsku	tsukushi/ small leucine rich proteoglycan [Source:MGI Symbol;Acc:MGI:2443855]	NA	NA	0	NA	NA	NA	0	NA	NA	0	0	0	NA	1701.19	1823.59	2092.27	1887.6	1573.36	1803.11	1913.24	3113.08	0.745343	0.0338026	-0.0509919	0.049251	0.247535	0.0990234	-0.101666	0.0949712	0.180504	0.882831
Tspan17	tetraspanin 17 [Source:MGI Symbol;Acc:MGI:1921507]	NA	NA	0	NA	NA	NA	0	NA	NA	0	0	0	NA	635.802	625.104	750.279	671.184	607.796	653.28	703.691	724.724	0.801247	0.0168187	0.0121882	-0.012292	0.251038	0.0903197	-0.0529963	0.0511183	0.158359	0.200849
Tspan3	tetraspanin 3 [Source:MGI Symbol;Acc:MGI:1928098]	NA	NA	0	NA	NA	NA	0	NA	NA	0	0	0	NA	5365.89	4995.84	5670.95	5994.44	4799.56	5239.57	5440.48	6194.98	0.792779	0.0189315	0.0506242	-0.0524654	0.130397	0.210433	-0.0646602	0.0618861	0.116172	0.303538
Tspyl1	testis-specific protein/ Y-encoded-like 1 [Source:MGI Symbol;Acc:MGI:1298395]	NA	NA	0	NA	NA	NA	0	NA	NA	0	0	0	NA	3161.48	3076.79	3322.5	3638.06	2880.08	3028.77	3192.79	3483.63	0.802063	0.0166232	0.019453	-0.0197188	0.0911224	0.222022	-0.0367683	0.0358544	0.111943	0.237715
Ttc33	tetratricopeptide repeat domain 33 [Source:MGI Symbol;Acc:MGI:1914765]	NA	NA	0	NA	NA	NA	0	NA	NA	0	0	0	NA	645.695	635.547	663.098	678.002	629.094	604.923	637.628	700.043	0.785869	0.0207727	0.0113816	-0.0114721	0.0497495	0.0818175	0.0279846	-0.0285382	0.0474233	0.182153
Ttpal	tocopherol (alpha) transfer protein-like [Source:MGI Symbol;Acc:MGI:1923330]	NA	NA	0	NA	NA	NA	0	NA	NA	0	0	0	NA	1878.8	2012.24	2091.61	2075.78	2005.09	1976.39	2206.74	2083.14	0.78251	0.0217064	-0.0503445	0.0486468	0.10446	0.0934967	0.0103635	-0.0104385	0.148609	0.0654536
Ubac2	ubiquitin associated domain containing 2 [Source:MGI Symbol;Acc:MGI:1916139]	NA	NA	0	NA	NA	NA	0	NA	NA	0	0	0	NA	885.838	856.188	912.598	904.713	865.046	836.664	966.994	937.186	0.946288	0.000371953	0.0243489	-0.0247669	0.067285	0.0547651	0.0238639	-0.0242653	0.184594	0.139422
Ubb	ubiquitin B [Source:MGI Symbol;Acc:MGI:98888]	NA	NA	0	NA	NA	NA	0	NA	NA	0	0	0	NA	5060.8	4915.24	5729.87	6135.02	4665.94	4814.53	5593.22	5961.85	0.906411	0.00190819	0.0208991	-0.0212064	0.200034	0.2986	-0.022791	0.0224366	0.23872	0.330802
Ubc	ubiquitin C [Source:MGI Symbol;Acc:MGI:98889]	NA	NA	0	NA	NA	NA	0	NA	NA	0	0	0	NA	29277.5	27964.8	32225	29323.4	29774	29289.1	30697	38432	0.708375	0.0492331	0.0327094	-0.0334682	0.171096	0.0349674	0.0117936	-0.0118908	0.0558384	0.380052
Ube2o	ubiquitin-conjugating enzyme E2O [Source:MGI Symbol;Acc:MGI:2444266]	NA	NA	0	NA	NA	NA	0	NA	NA	0	0	0	NA	2076.76	2136.88	2194.67	2152.74	1901.52	2138.65	2210.35	2500.54	0.784565	0.0211322	-0.0207321	0.0204383	0.058935	0.0311043	-0.0872616	0.0822833	0.129857	0.307822
Ubr3	ubiquitin protein ligase E3 component n-recognin 3 [Source:MGI Symbol;Acc:MGI:1861100]	NA	NA	0	NA	NA	NA	0	NA	NA	0	0	0	NA	5931.29	5396.87	6343.29	6316.83	5554.43	5586.1	6149.33	5971.9	0.723213	0.0426166	0.0665039	-0.0697183	0.16339	0.15736	-0.00410706	0.0040954	0.142682	0.100442
Ubr4	ubiquitin protein ligase E3 component n-recognin 4 [Source:MGI Symbol;Acc:MGI:1916366]	NA	NA	0	NA	NA	NA	0	NA	NA	0	0	0	NA	18420.3	17862.5	19707.9	18836.2	17563.8	18801.5	19196.5	20501.7	0.798956	0.017375	0.0220094	-0.0223504	0.119484	0.0542223	-0.049954	0.048282	0.0782829	0.173179
Ubxn7	UBX domain protein 7 [Source:MGI Symbol;Acc:MGI:2146388]	NA	NA	0	NA	NA	NA	0	NA	NA	0	0	0	NA	4390.82	4702.16	4972.48	5658.02	4783.31	4428.72	5132.45	5659.02	0.775501	0.023738	-0.050264	0.0485716	0.129213	0.315543	0.0544893	-0.0566284	0.156128	0.297032
Uchl3	ubiquitin carboxyl-terminal esterase L3 (ubiquitin thiolesterase) [Source:MGI Symbol;Acc:MGI:1355274]	NA	NA	0	NA	NA	NA	0	NA	NA	0	0	0	NA	533	540.882	512.282	551.206	539.733	580.701	607.226	679.91	0.706798	0.0499701	-0.010628	0.0105503	-0.0678247	0.0378289	-0.0537395	0.0518095	0.116248	0.279359
Ugt1a6a	UDP glucuronosyltransferase 1 family/ polypeptide A6A [Source:MGI Symbol;Acc:MGI:2137698]	NA	NA	0	NA	NA	NA	0	NA	NA	0	0	0	NA	84.6882	79.5944	112.27	116.25	111.624	89.7304	166.443	121.757	0.798772	0.0174199	0.0440531	-0.0454408	0.450789	0.50105	0.148911	-0.166069	0.725287	0.274272
Ugt1a6b	UDP glucuronosyltransferase 1 family/ polypeptide A6B [Source:MGI Symbol;Acc:MGI:3580629]	NA	NA	0	NA	NA	NA	0	NA	NA	0	0	0	NA	20.3672	18.4124	22.5142	22.5337	19.3908	18.3006	26.1933	19.8098	0.723707	0.0424063	0.0709499	-0.0746204	0.215541	0.216791	0.0411363	-0.0423437	0.474962	0.0719757
Ulk1	unc-51 like kinase 1 [Source:MGI Symbol;Acc:MGI:1270126]	NA	NA	0	NA	NA	NA	0	NA	NA	0	0	0	NA	1984.07	1748.17	2158.03	1971.95	1889.45	1754.16	2143.05	2036.99	0.786418	0.0206224	0.0884199	-0.0941949	0.209677	0.0795844	0.0525953	-0.0545855	0.234301	0.161069
Unc5d	unc-5 netrin receptor D [Source:MGI Symbol;Acc:MGI:2389364]	NA	NA	0	NA	NA	NA	0	NA	NA	0	0	0	NA	36.9202	31.3692	35.7129	34.5742	30.3265	34.3315	38.3616	37.1603	0.739856	0.0358724	0.112748	-0.122311	0.0647839	0.0180326	-0.0922505	0.0867046	0.246834	0.200935
Usp19	ubiquitin specific peptidase 19 [Source:MGI Symbol;Acc:MGI:1918722]	NA	NA	0	NA	NA	NA	0	NA	NA	0	0	0	NA	4493.01	4436.92	5073.58	4784.23	4638.77	4425.4	5341.05	5418.32	0.963041	0.000122736	0.00903446	-0.00909139	0.184353	0.0996378	0.0335668	-0.0343664	0.236949	0.25767
Usp2	ubiquitin specific peptidase 2 [Source:MGI Symbol;Acc:MGI:1858178]	NA	NA	0	NA	NA	NA	0	NA	NA	0	0	0	NA	369.376	352.811	515.985	427.408	476.127	424.488	634.777	669.396	0.922483	0.00109783	0.0327175	-0.0334768	0.514955	0.243241	0.080436	-0.0851869	0.495339	0.57195
Usp22	ubiquitin specific peptidase 22 [Source:MGI Symbol;Acc:MGI:2144157]	NA	NA	0	NA	NA	NA	0	NA	NA	0	0	1	Ubiquitin modifiers	5371.35	5511.86	5690.65	6493.94	5385.44	5059.28	5701.61	6191.57	0.773334	0.024389	-0.0187476	0.0185071	0.0645596	0.255061	0.0443625	-0.04577	0.126666	0.245602
Usp27x	ubiquitin specific peptidase 27/ X chromosome [Source:MGI Symbol;Acc:MGI:1859645]	NA	NA	0	NA	NA	NA	0	NA	NA	0	0	1	Ubiquitin modifiers	185.157	162.771	183.912	195.46	167.412	178.65	193.777	205.541	0.82081	0.0125203	0.0899594	-0.0959441	0.0802252	0.168082	-0.0476263	0.0461042	0.163362	0.248396
Usp38	ubiquitin specific peptidase 38 [Source:MGI Symbol;Acc:MGI:1922091]	NA	NA	0	NA	NA	NA	0	NA	NA	0	0	0	NA	1412.01	1373.48	1490.6	1470.65	1310.18	1426.08	1509.84	1826.42	0.817804	0.0131294	0.0198186	-0.0200946	0.0979627	0.078523	-0.0624426	0.0598518	0.142197	0.416816
Usp9x	ubiquitin specific peptidase 9/ X chromosome [Source:MGI Symbol;Acc:MGI:894681]	PANCAN	tsg	1	NA	NA	NA	0	HNSC	LoF	1	1	0	NA	19910.3	19634.9	21502.7	20898.2	19691.4	20193.3	21656.9	22402.7	0.93866	0.000550782	0.0100125	-0.0100825	0.121019	0.079877	-0.0182693	0.0180408	0.118995	0.167838
Vav3	vav 3 oncogene [Source:MGI Symbol;Acc:MGI:1888518]	NA	NA	0	NA	NA	NA	0	NA	NA	0	0	0	NA	151.617	126.83	177.347	192.325	146.363	109.148	181.728	161.181	0.772884	0.0245253	0.123026	-0.134503	0.34917	0.466146	0.196164	-0.227098	0.508398	0.335297
Vcpip1	valosin containing protein (p97)/p47 complex interacting protein 1 [Source:MGI Symbol;Acc:MGI:1917925]	NA	NA	0	NA	NA	NA	0	NA	NA	0	0	0	NA	3226.75	3004.69	3288.34	3455.38	3119.8	3264.78	3385.43	3773.83	0.790228	0.0195989	0.0505162	-0.0523495	0.0777926	0.149277	-0.0331401	0.0323959	0.0847456	0.241439
Vmn2r57	vomeronasal 2/ receptor 57 [Source:MGI Symbol;Acc:MGI:3703084]	NA	NA	0	NA	NA	NA	0	NA	NA	0	0	0	NA	4.89883	4.71566	4.91009	4.9199	4.77974	4.65477	5.03516	4.80894	0.733693	0.0382876	0.0272269	-0.0277506	0.0305381	0.0334174	0.018984	-0.0192371	0.0940893	0.027773
Vpreb1	pre-B lymphocyte gene 1 [Source:MGI Symbol;Acc:MGI:98936]	NA	NA	0	NA	NA	NA	0	NA	NA	0	0	0	NA	5.98695	6.25076	6.22185	6.00673	6.01944	5.96955	6.33948	6.47703	0.767868	0.0260798	-0.0314416	0.030771	0.0240827	-0.0266826	0.00599084	-0.00601582	0.0807273	0.111695
Vps11	VPS11/ CORVET/HOPS core subunit [Source:MGI Symbol;Acc:MGI:1918982]	NA	NA	0	NA	NA	NA	0	NA	NA	0	0	0	NA	1305.73	1326.35	1576.61	1607.87	1462.13	1259.51	1584.86	1671.1	0.812865	0.0141701	-0.0113478	0.0112592	0.260624	0.288947	0.103596	-0.111614	0.219886	0.296325
Vps13d	vacuolar protein sorting 13D [Source:MGI Symbol;Acc:MGI:2448530]	NA	NA	0	NA	NA	NA	0	NA	NA	0	0	0	NA	4726.89	4365.88	4846.69	4928.14	4611.28	4472.01	5521.07	4929.55	0.851132	0.00735445	0.0561718	-0.0584478	0.0922811	0.116324	0.021951	-0.0222901	0.281733	0.11824
Vps18	VPS18 CORVET/HOPS core subunit [Source:MGI Symbol;Acc:MGI:2443626]	NA	NA	0	NA	NA	NA	0	NA	NA	0	0	0	NA	1083.78	1138.78	1336.47	1363.92	1200.99	1095.63	1324.57	1426.17	0.83139	0.0105194	-0.036149	0.0352654	0.266197	0.295531	0.0647144	-0.0677542	0.206014	0.312632
Vps8	VPS8 CORVET complex subunit [Source:MGI Symbol;Acc:MGI:2146407]	NA	NA	0	NA	NA	NA	0	NA	NA	0	0	0	NA	1823.88	1826.06	2188.3	2231.46	1974.86	1668	2428.17	2189.26	0.869853	0.00498718	-0.000863583	0.000863066	0.261941	0.290114	0.116679	-0.126953	0.414804	0.265375
Vwa1	von Willebrand factor A domain containing 1 [Source:MGI Symbol;Acc:MGI:2179729]	NA	NA	0	NA	NA	NA	0	NA	NA	0	0	0	NA	48.4731	48.6976	49.6194	50.16	43.8611	45.8039	51.8665	50.0853	0.920217	0.00119483	-0.00333633	0.00332863	0.0303816	0.0460149	-0.0316019	0.0309244	0.210258	0.159843
Wdr20rt	WD repeat domain 20/ retrogene [Source:MGI Symbol;Acc:MGI:1918198]	NA	NA	0	NA	NA	NA	0	NA	NA	0	0	0	NA	4.46483	4.59435	4.63005	4.48468	4.50681	4.60659	4.77289	4.87705	0.803536	0.0162742	-0.0207764	0.0204814	0.0316487	-0.0143751	-0.0158824	0.0157094	0.0668749	0.0980189
Wdr24	WD repeat domain 24 [Source:MGI Symbol;Acc:MGI:2446285]	NA	NA	0	NA	NA	NA	0	NA	NA	0	0	0	NA	480.224	499.03	557.386	565.068	485.195	476.407	593.823	514.74	0.80136	0.0167915	-0.0279751	0.027443	0.186994	0.206742	0.0131243	-0.0132448	0.304594	0.0984033
Wdr25	WD repeat domain 25 [Source:MGI Symbol;Acc:MGI:3045255]	NA	NA	0	NA	NA	NA	0	NA	NA	0	0	0	NA	99.1257	97.6278	105.425	94.8497	91.5247	87.5331	102.966	96.1024	0.741813	0.0351258	0.0109418	-0.0110254	0.0998329	-0.0526735	0.0318078	-0.0325249	0.201743	0.102219
Wdr26	WD repeat domain 26 [Source:MGI Symbol;Acc:MGI:1923825]	NA	NA	0	NA	NA	NA	0	NA	NA	0	0	0	NA	9269.59	9000.5	10003.5	9471.2	9301	9382.38	9787.3	10373.8	0.81131	0.0145082	0.0210933	-0.0214062	0.131016	0.0521351	-0.00629798	0.0062706	0.0672271	0.15119
Wdr45	WD repeat domain 45 [Source:MGI Symbol;Acc:MGI:1859606]	NA	NA	0	NA	NA	NA	0	BLCA	LoF	1	1	0	NA	457.881	546.705	557.73	540.866	543.513	479.726	599.67	600.511	0.778528	0.0228466	-0.133556	0.122233	0.151037	0.106742	0.0872441	-0.0928615	0.229097	0.231118
Wdr48	WD repeat domain 48 [Source:MGI Symbol;Acc:MGI:1914811]	NA	NA	0	NA	NA	NA	0	NA	NA	0	0	0	NA	2095.95	2203.24	2114.85	2328.76	2173.7	2043.18	2299.38	2306.72	0.74954	0.03227	-0.0364604	0.0355616	-0.023505	0.115497	0.0439756	-0.0453583	0.125065	0.129664
Wdr61	WD repeat domain 61 [Source:MGI Symbol;Acc:MGI:1917493]	NA	NA	0	NA	NA	NA	0	NA	NA	0	0	0	NA	1379.29	1417.09	1889.88	1657.51	1360.29	1500.7	1780.11	1693.32	0.77802	0.0229947	-0.0196361	0.0193724	0.434738	0.245457	-0.0725997	0.0691207	0.315447	0.243339
Wdr72	WD repeat domain 72 [Source:MGI Symbol;Acc:MGI:3583957]	NA	NA	0	NA	NA	NA	0	NA	NA	0	0	0	NA	145.959	73.7135	204.5	159.762	236.354	125.998	471.468	302.197	0.777917	0.0230249	0.410208	-0.575352	0.89675	0.540569	0.383555	-0.523986	1.37977	0.738096
Wdr81	WD repeat domain 81 [Source:MGI Symbol;Acc:MGI:2681828]	NA	NA	0	NA	NA	NA	0	NA	NA	0	0	0	NA	2081.63	1985.83	2388.08	2252.48	2048.95	2111.37	2478.14	2546.01	0.950266	0.000296186	0.0335874	-0.0343881	0.231724	0.147385	-0.0218064	0.0214817	0.252564	0.291546
Wdr91	WD repeat domain 91 [Source:MGI Symbol;Acc:MGI:2141558]	NA	NA	0	NA	NA	NA	0	NA	NA	0	0	0	NA	439.129	351.577	464.233	432.209	363.823	308.691	415.917	386.816	0.718524	0.0446455	0.151503	-0.1693	0.231706	0.128587	0.113674	-0.123403	0.306733	0.202085
Wdtc1	WD and tetratricopeptide repeats 1 [Source:MGI Symbol;Acc:MGI:2685541]	NA	NA	0	NA	NA	NA	0	NA	NA	0	0	0	NA	1086.62	1014.9	1189.51	1225.27	1079.75	957.699	1390.6	1165.24	0.854168	0.00693025	0.0484179	-0.0500994	0.178942	0.221665	0.0839327	-0.089119	0.448945	0.193867
Wipf2	WAS/WASL interacting protein family/ member 2 [Source:MGI Symbol;Acc:MGI:1924462]	NA	NA	0	NA	NA	NA	0	NA	NA	0	0	0	NA	982.012	996.907	1030.9	1027.13	974.182	1060.87	1086.59	1302.26	0.761395	0.0281736	-0.0109003	0.0108186	0.059193	0.0539034	-0.0628012	0.0601811	0.0947419	0.355952
Wipi1	WD repeat domain/ phosphoinositide interacting 1 [Source:MGI Symbol;Acc:MGI:1261864]	NA	NA	0	NA	NA	NA	0	NA	NA	0	0	0	NA	2929.31	3109.66	3062.03	3198.41	2911.97	3205.16	3361.25	3656.24	0.810867	0.0146053	-0.0437404	0.0424532	0.0201868	0.0830538	-0.0708582	0.0675403	0.136144	0.257503
Wls	wntless WNT ligand secretion mediator [Source:MGI Symbol;Acc:MGI:1915401]	NA	NA	0	NA	NA	NA	0	NA	NA	0	0	0	NA	16357.3	14233.7	19792.4	17351.9	14251.4	12520.2	15606.2	16308.7	0.740831	0.0354993	0.0968278	-0.103797	0.37184	0.181985	0.0903974	-0.0964425	0.221416	0.284935
Wnt7a	wingless-type MMTV integration site family/ member 7A [Source:MGI Symbol;Acc:MGI:98961]	NA	NA	0	NA	NA	NA	0	NA	NA	0	0	0	NA	1.85333	1.82885	1.88375	1.83592	1.82045	1.82115	1.89589	1.85123	0.769522	0.0255607	0.00955792	-0.00962166	0.0330511	-0.0040537	-0.00027735	0.000277297	0.0583046	0.0239124
Xpc	xeroderma pigmentosum/ complementation group C [Source:MGI Symbol;Acc:MGI:103557]	NA	NA	0		TSG	Mis_N_F_S	1	HC	LoF	1	1	0	NA	538.502	518.668	549.496	672.395	506.573	489.81	565.363	576.446	0.715174	0.0461299	0.0268155	-0.0273233	0.0559733	0.347173	0.024071	-0.0244795	0.182476	0.210484
Xpnpep3	X-prolyl aminopeptidase 3/ mitochondrial [Source:MGI Symbol;Acc:MGI:2445217]	NA	NA	0	NA	NA	NA	0	NA	NA	0	0	0	NA	345.17	396.267	393.751	410.284	361.809	370.221	399.69	408.827	0.746209	0.0334828	-0.103017	0.0961491	0.0869586	0.146298	-0.0166752	0.0164847	0.126978	0.159586
Xylt1	xylosyltransferase 1 [Source:MGI Symbol;Acc:MGI:2451073]	NA	NA	0	NA	NA	NA	0	NA	NA	0	0	0	NA	222.197	187.327	238.552	247.136	205.459	190.569	265.514	303.635	0.931906	0.000749586	0.117891	-0.128388	0.220352	0.271352	0.053248	-0.0552888	0.423183	0.616731
Xylt2	xylosyltransferase II [Source:MGI Symbol;Acc:MGI:2444797]	NA	NA	0	NA	NA	NA	0	NA	NA	0	0	0	NA	773.498	831.87	798.682	841.56	797.229	786.389	871.389	842.987	0.779953	0.0224346	-0.0534342	0.0515256	-0.00721118	0.0682334	0.00984188	-0.00990948	0.138165	0.0903588
Yipf3	Yip1 domain family/ member 3 [Source:MGI Symbol;Acc:MGI:106280]	NA	NA	0	NA	NA	NA	0	NA	NA	0	0	0	NA	2170.53	1998.9	2387.71	2210.71	1973.93	2002.89	2214.92	2379.25	0.867773	0.00522167	0.0581985	-0.0606453	0.195776	0.0846603	-0.0105415	0.010465	0.155636	0.258892
Ypel2	yippee like 2 [Source:MGI Symbol;Acc:MGI:1925114]	NA	NA	0	NA	NA	NA	0	NA	NA	0	0	0	NA	864.456	612.73	1200.92	1054.06	997.74	726.477	1398.19	1135.76	0.735738	0.0374758	0.227013	-0.269528	0.70129	0.5131	0.210795	-0.246952	0.697617	0.397716
Ypel5	yippee like 5 [Source:MGI Symbol;Acc:MGI:1916937]	NA	NA	0	NA	NA	NA	0	NA	NA	0	0	0	NA	2319.22	2121.69	3164.85	2523.09	2580.86	2566.97	3037.11	3523.79	0.77694	0.0233114	0.0627854	-0.0656426	0.511281	0.184336	0.0038869	-0.00389741	0.238735	0.453162
Ythdf1	YTH N6-methyladenosine RNA binding protein 1 [Source:MGI Symbol;Acc:MGI:1917431]	NA	NA	0	NA	NA	NA	0	NA	NA	0	0	0	NA	3002.93	2949.98	2959.39	3122.15	2852.52	2961.66	3019.1	3269.18	0.750351	0.0319787	0.0127746	-0.0128887	-0.0082956	0.0689459	-0.027341	0.0268325	0.0545417	0.169354
Zbtb33	zinc finger and BTB domain containing 33 [Source:MGI Symbol;Acc:MGI:1927290]	NA	NA	0	NA	NA	NA	0	NA	NA	0	0	0	NA	1468.56	1469.91	1526.99	1658.99	1468.3	1585.01	1616.7	1898.84	0.762181	0.027914	-0.000663513	0.000663208	0.0556224	0.175237	-0.0562275	0.054118	0.0826798	0.314748
Zbtb34	zinc finger and BTB domain containing 34 [Source:MGI Symbol;Acc:MGI:2685195]	NA	NA	0	NA	NA	NA	0	NA	NA	0	0	0	NA	835.947	831.823	1004.14	1060.01	894.703	769.225	995.035	988.704	0.777976	0.0230075	0.00356251	-0.00357133	0.268044	0.346158	0.104888	-0.113116	0.258227	0.249017
Zbtb43	zinc finger and BTB domain containing 43 [Source:MGI Symbol;Acc:MGI:1919084]	NA	NA	0	NA	NA	NA	0	NA	NA	0	0	0	NA	819.393	726.807	893.859	859.881	721.793	758.15	778.413	908.754	0.709347	0.0487819	0.0839001	-0.0890822	0.209392	0.153482	-0.0358845	0.0350136	0.0730666	0.296421
Zbtb49	zinc finger and BTB domain containing 49 [Source:MGI Symbol;Acc:MGI:1922329]	NA	NA	0	NA	NA	NA	0	NA	NA	0	0	0	NA	164.242	165.981	174.613	176.276	172.652	171.035	186.683	197.756	0.951033	0.000282861	-0.00762134	0.00758129	0.0807172	0.0943964	0.00677108	-0.00680301	0.119497	0.202627
Zc3h10	zinc finger CCCH type containing 10 [Source:MGI Symbol;Acc:MGI:2143670]	NA	NA	0	NA	NA	NA	0	NA	NA	0	0	0	NA	302.524	292.474	318.666	300.814	279.047	261.313	293.837	301.95	0.85071	0.00741473	0.024163	-0.0245746	0.0991586	0.0159861	0.0465875	-0.0481422	0.121092	0.160387
Zcwpw1	zinc finger/ CW type with PWWP domain 1 [Source:MGI Symbol;Acc:MGI:2685899]	NA	NA	0	NA	NA	NA	0	NA	NA	0	0	1	HM_r	65.2458	66.3215	72.7575	85.3929	62.8486	62.8166	104.842	90.0607	0.951458	0.00027565	-0.0118446	0.0117482	0.145366	0.376387	0.000367483	-0.000367577	0.738636	0.519386
Zdbf2	zinc finger/ DBF-type containing 2 [Source:MGI Symbol;Acc:MGI:1921134]	NA	NA	0	NA	NA	NA	0	NA	NA	0	0	0	NA	1349.6	1714.52	1607.32	2079.27	1206.3	1072.93	1529.83	1528.32	0.802876	0.0164301	-0.182941	0.162332	0.0691874	0.440608	0.0820406	-0.0869887	0.424832	0.423399
Zdhhc24	zinc finger/ DHHC domain containing 24 [Source:MGI Symbol;Acc:MGI:1917855]	NA	NA	0	NA	NA	NA	0	NA	NA	0	0	0	NA	296.474	361.396	413.441	419.225	312.51	336.522	373.919	415.75	0.739999	0.0358175	-0.149896	0.135778	0.32988	0.349922	-0.0543862	0.0524102	0.204437	0.357425
Zfp169	zinc finger protein 169 [Source:MGI Symbol;Acc:MGI:1915161]	NA	NA	0	NA	NA	NA	0	NA	NA	0	0	0	NA	381.676	374.851	394.411	418.562	398.879	392.714	432.034	441.125	0.909292	0.0017412	0.012957	-0.0130744	0.0603073	0.14605	0.011192	-0.0112795	0.126386	0.156428
Zfp235	zinc finger protein 235 [Source:MGI Symbol;Acc:MGI:1929117]	NA	NA	0	NA	NA	NA	0	NA	NA	0	0	0	NA	199.713	190.204	184.146	210.724	181.209	162.606	215.063	190.639	0.712029	0.0475499	0.0347604	-0.0356186	-0.0823167	0.112189	0.0760213	-0.0802511	0.323126	0.149216
Zfp365	zinc finger protein 365 [Source:MGI Symbol;Acc:MGI:2143676]	NA	NA	0	NA	NA	NA	0	NA	NA	0	0	0	NA	1676.93	1516.46	2168.32	1912.92	1592.06	1738.15	2176.3	1891.92	0.741281	0.0353279	0.0707366	-0.0743845	0.44149	0.260685	-0.0647205	0.0619413	0.386267	0.184238
Zfp37	zinc finger protein 37 [Source:MGI Symbol;Acc:MGI:99181]	NA	NA	0	NA	NA	NA	0	NA	NA	0	0	0	NA	494.631	491.8	493.499	539.783	446.801	479.579	536.717	509.97	0.839631	0.00911063	0.00413425	-0.00414613	0.000826681	0.130159	-0.0519711	0.0501638	0.212556	0.138807
Zfp518a	zinc finger protein 518A [Source:MGI Symbol;Acc:MGI:1919922]	NA	NA	0	NA	NA	NA	0	NA	NA	0	0	0	NA	1150.74	1037.1	1206.51	1299.96	1121	1045.44	1220.82	1206.79	0.733081	0.0385326	0.0730531	-0.0769505	0.141334	0.248962	0.0494576	-0.0512135	0.172524	0.155856
Zfp790	zinc finger protein 790 [Source:MGI Symbol;Acc:MGI:1923431]	NA	NA	0	NA	NA	NA	0	NA	NA	0	0	0	NA	787.981	782.74	772.933	816.719	698.01	734.982	790.224	880.925	0.804733	0.015994	0.00480582	-0.00482189	-0.0230112	0.0564862	-0.0377108	0.0367501	0.141304	0.298061
Zfp871	zinc finger protein 871 [Source:MGI Symbol;Acc:MGI:1921793]	NA	NA	0	NA	NA	NA	0	NA	NA	0	0	0	NA	4505.86	4497.65	4784.84	4580.51	4751.22	4659.51	4937.21	4946.51	0.846253	0.00807024	0.00131421	-0.00131541	0.0879834	0.0250207	0.0139923	-0.0141294	0.0693877	0.0721052
Zfp874b	zinc finger protein 874b [Source:MGI Symbol;Acc:MGI:3040702]	NA	NA	0	GBM		Mis	1	BLCA_PRAD	LoF	1	1	0	NA	242.971	256.931	291.657	304.305	272.7	262.899	305.981	294.469	0.714746	0.0463213	-0.0408612	0.0397357	0.222629	0.283874	0.0261601	-0.0266432	0.19229	0.136961
Zfp954	zinc finger protein 954 [Source:MGI Symbol;Acc:MGI:1917764]	NA	NA	0	NA	NA	NA	0	NA	NA	0	0	0	NA	273.472	253.056	248.026	289.258	240.934	261.067	280.306	316.281	0.722044	0.0431171	0.0548814	-0.0570519	-0.0860207	0.135846	-0.0590508	0.0567285	0.159313	0.333515
Zfp957	zinc finger protein 957 [Source:MGI Symbol;Acc:MGI:2145729]	NA	NA	0	NA	NA	NA	0	NA	NA	0	0	1		1.62522	1.62215	1.66741	1.63626	1.62268	1.62322	1.72758	1.63645	0.713682	0.0468004	0.00136169	-0.00136298	0.0383384	0.0111339	-0.000241461	0.000241421	0.0901342	0.0119463
Zfp963	zinc finger protein 963 [Source:MGI Symbol;Acc:MGI:4867078]	NA	NA	0	NA	NA	NA	0	NA	NA	0	0	0	NA	106.732	110.826	121.141	117.103	103.001	103.944	122.516	111.186	0.864468	0.00560844	-0.0274124	0.0269012	0.155292	0.106374	-0.0065893	0.00655934	0.243722	0.103727
Zfpm1	zinc finger protein/ multitype 1 [Source:MGI Symbol;Acc:MGI:1095400]	NA	NA	0	NA	NA	NA	0	NA	NA	0	0	0	NA	870.729	976.901	921.282	1000.96	927.383	963.329	1240.38	1892.9	0.795347	0.0182742	-0.0853801	0.0806083	-0.00396151	0.115704	-0.0276923	0.0271708	0.391847	1.00167
Zkscan1	zinc finger with KRAB and SCAN domains 1 [Source:MGI Symbol;Acc:MGI:1921820]	NA	NA	0	NA	NA	NA	0	NA	NA	0	0	0	NA	2768.58	2654.62	2962.02	3406.84	2830.68	2739.47	3135.32	3210.57	0.743867	0.0343522	0.0300021	-0.0306393	0.127437	0.329288	0.0234318	-0.0238187	0.170897	0.205114
Zkscan14	zinc finger with KRAB and SCAN domains 14 [Source:MGI Symbol;Acc:MGI:1914485]	NA	NA	0	NA	NA	NA	0	NA	NA	0	0	0	NA	122.717	120.792	124.652	141.35	114.646	124.619	132.922	138.053	0.797894	0.0176365	0.01136	-0.0114502	0.0339327	0.215301	-0.0614197	0.0589114	0.151964	0.206608
Zkscan6	zinc finger with KRAB and SCAN domains 6 [Source:MGI Symbol;Acc:MGI:1289293]	NA	NA	0	NA	NA	NA	0	NA	NA	0	0	0	NA	305.532	310.222	331.386	316.066	288.767	292.761	323.016	349.81	0.915892	0.00139521	-0.0110291	0.0109455	0.10616	0.0378727	-0.00994351	0.00987544	0.151756	0.266723
Zswim1	zinc finger SWIM-type containing 1 [Source:MGI Symbol;Acc:MGI:1919221]	NA	NA	0	NA	NA	NA	0	NA	NA	0	0	0	NA	336.017	356.35	430.111	375.444	355.973	368.91	429.453	412.657	0.80162	0.0167292	-0.0430022	0.0417575	0.31317	0.117062	-0.0259795	0.02552	0.244752	0.187194
Zswim5	zinc finger SWIM-type containing 5 [Source:MGI Symbol;Acc:MGI:1921714]	NA	NA	0	NA	NA	NA	0	NA	NA	0	0	0	NA	6.97788	7.00419	7.27038	7.05054	6.94664	6.904	7.4301	7.32486	0.940382	0.000506345	-0.00271773	0.00271262	0.0565238	0.0122282	0.00443486	-0.00444853	0.101501	0.0809219

## Sheet: Suppl_Table_S2
PTM_RNA_Genotype_Down															Normalized RNA-seq read count values								PTM significance		Log2 transformed normalized RNA-seq read count values
Gene.name	Gene.description	Bailey_Cancer	Bailey_Role	is_Bailey	Census_Cancer	Census_Role	Census_MutationTypes	is_Census	Intogen_Cancer	Intogen_Role	is_Intogen	is_driver	is_ERG	ERG_function	hemiZ_WT_rep1	hemiZ_WT_rep2	hemiZ_sKO_rep1	hemiZ_sKO_rep2	homoZ_WT_rep1	homoZ_WT_rep2	homoZ_sKO_rep1	homoZ_sKO_rep2	R values	p Values	hemiZ_WT_rep1	hemiZ_WT_rep2	hemiZ_sKO_rep1	hemiZ_sKO_rep2	homoZ_WT_rep1	homoZ_WT_rep2	homoZ_sKO_rep1	homoZ_sKO_rep2
0610010F05Rik	RIKEN cDNA 0610010F05 gene [Source:MGI Symbol;Acc:MGI:1918925]	NA	NA	0	NA	NA	NA	0	NA	NA	0	0	0	NA	1327.4	1282.77	1083.25	862.716	1310.75	1334.03	981.865	1092.59	0.756918	0.0296804	0.0244589	-0.0248807	-0.26878	-0.597185	-0.0127557	0.0126439	-0.429551	-0.275389
1110059E24Rik	RIKEN cDNA 1110059E24 gene [Source:MGI Symbol;Acc:MGI:1913456]	NA	NA	0	NA	NA	NA	0	NA	NA	0	0	0	NA	568.142	573.741	518.829	595.693	556.567	573.226	497.397	480.812	0.80682	0.0155125	-0.00709174	0.00705705	-0.138084	0.0612261	-0.0214313	0.0211176	-0.183589	-0.232515
1700008J07Rik	RIKEN cDNA 1700008J07 gene [Source:MGI Symbol;Acc:MGI:1916610]	NA	NA	0	NA	NA	NA	0	NA	NA	0	0	0	NA	63.5563	64.733	66.2215	56.724	66.9156	67.3889	59.8071	56.5887	0.801695	0.0167112	-0.0132934	0.0131721	0.0459699	-0.177369	-0.00509248	0.00507456	-0.16712	-0.246922
1700048O20Rik	RIKEN cDNA 1700048O20 gene [Source:MGI Symbol;Acc:MGI:1920637]	NA	NA	0	NA	NA	NA	0	NA	NA	0	0	0	NA	63.948	67.3414	60.5651	63.9438	56.1357	57.9676	49.111	45.0574	0.910031	0.00169997	-0.0377789	0.0368148	-0.116191	-0.0378724	-0.023351	0.0229791	-0.216223	-0.340504
1810014B01Rik	RIKEN cDNA 1810014B01 gene [Source:MGI Symbol;Acc:MGI:1913513]	NA	NA	0	NA	NA	NA	0	NA	NA	0	0	0	NA	33.4837	33.7078	33.5661	34.042	31.6667	33.746	29.3135	28.2411	0.802943	0.0164142	-0.00481955	0.0048035	-0.00127332	0.0190378	-0.0466044	0.0451459	-0.158009	-0.211776
1810041H14Rik	RIKEN cDNA 1810041H14 gene [Source:MGI Symbol;Acc:MGI:1925562]	NA	NA	0	NA	NA	NA	0	NA	NA	0	0	0	NA	3.68112	3.69626	3.68544	3.67077	3.8063	3.80279	3.67157	3.76023	0.78401	0.0212862	-0.00296319	0.00295712	-0.00127176	-0.00702482	0.000665834	-0.000666141	-0.0513265	-0.0169047
2210015D19Rik	NA	NA	NA	0	NA	NA	NA	0	NA	NA	0	0	0	NA	125.201	118.808	122.787	120.306	127.315	128.248	111.743	112.215	0.856392	0.00662962	0.037316	-0.0383069	0.0092176	-0.0202303	-0.00527387	0.00525467	-0.193491	-0.187413
2310002F09Rik	RIKEN cDNA 2310002F09 gene [Source:MGI Symbol;Acc:MGI:1916779]	NA	NA	0	NA	NA	NA	0	NA	NA	0	0	0	NA	10.3347	9.6246	9.23006	9.49538	10.4642	11.3026	9.65967	9.7391	0.868382	0.00515231	0.0504359	-0.0522632	-0.11265	-0.0717631	-0.0566637	0.054522	-0.172086	-0.160271
2410018L13Rik	RIKEN cDNA 2410018L13 gene [Source:MGI Symbol;Acc:MGI:1916982]	NA	NA	0	NA	NA	NA	0	NA	NA	0	0	0	NA	121.154	118.698	109.053	114.917	122.848	128.536	101.36	91.3388	0.929359	0.000835237	0.0146971	-0.0148484	-0.137112	-0.0615463	-0.0330194	0.0322806	-0.310403	-0.460591
2510002D24Rik	RIKEN cDNA 2510002D24 gene [Source:MGI Symbol;Acc:MGI:1919557]	NA	NA	0	NA	NA	NA	0	NA	NA	0	0	0	NA	128.085	130.198	114.531	135.363	132.698	118.133	111.242	84.6368	0.725671	0.0415761	-0.0118534	0.0117568	-0.173221	0.0678786	0.0814316	-0.0863044	-0.173013	-0.567359
2610001J05Rik	RIKEN cDNA 2610001J05 gene [Source:MGI Symbol;Acc:MGI:1913770]	NA	NA	0	NA	NA	NA	0	NA	NA	0	0	0	NA	1060.16	1146.35	1026.55	1054.79	1021.84	1171.84	917.097	968.611	0.816865	0.0133234	-0.0574846	0.0552816	-0.103964	-0.0648087	-0.102186	0.0954243	-0.258208	-0.179364
2610305D13Rik	NA	NA	NA	0	NA	NA	NA	0	NA	NA	0	0	0	NA	89.9263	89.3394	65.1106	86.7624	82.7796	81.9085	70.9211	65.5606	0.716083	0.0457238	0.00471521	-0.00473067	-0.461135	-0.0469581	0.00761105	-0.00765141	-0.215449	-0.328835
2700029M09Rik	NA	NA	NA	0	NA	NA	NA	0	NA	NA	0	0	0	NA	696.797	754.705	528.444	588.158	779.681	850.137	585.27	660.611	0.853795	0.00698145	-0.0587357	0.0564376	-0.457725	-0.303271	-0.0637551	0.0610565	-0.477536	-0.302837
2700038G22Rik	RIKEN cDNA 2700038G22 gene [Source:MGI Symbol;Acc:MGI:1914444]	NA	NA	0	NA	NA	NA	0	NA	NA	0	0	0	NA	79.2734	93.327	61.6535	57.7648	82.3644	93.6456	60.7165	74.0409	0.723542	0.0424764	-0.122526	0.11293	-0.485181	-0.579173	-0.0955645	0.0896257	-0.535497	-0.249262
2700062C07Rik	RIKEN cDNA 2700062C07 gene [Source:MGI Symbol;Acc:MGI:1915296]	NA	NA	0	NA	NA	NA	0	NA	NA	0	0	0	NA	269.804	284.743	261.71	270.434	280.927	275.634	227.295	266.258	0.74943	0.0323095	-0.0393964	0.0383491	-0.0833403	-0.036034	0.0136554	-0.0137859	-0.291974	-0.0637135
2700099C18Rik	RIKEN cDNA 2700099C18 gene [Source:MGI Symbol;Acc:MGI:1924272]	NA	NA	0	NA	NA	NA	0	NA	NA	0	0	0	NA	81.7556	88.894	63.8928	60.0664	92.4438	82.7729	62.9111	53.5236	0.924765	0.00100548	-0.0616483	0.0591216	-0.417313	-0.506407	0.0775083	-0.08191	-0.477753	-0.710893
2810002D19Rik	RIKEN cDNA 2810002D19 gene [Source:MGI Symbol;Acc:MGI:1913707]	NA	NA	0	NA	NA	NA	0	NA	NA	0	0	0	NA	196.417	180.461	172.731	185.654	175.765	183.384	170.396	161.213	0.713968	0.0466713	0.0598201	-0.0624082	-0.125569	-0.021483	-0.0309384	0.0302888	-0.0756927	-0.155613
2810417H13Rik	NA	NA	NA	0	NA	NA	NA	0	NA	NA	0	0	0	NA	1301.74	1770.27	297.214	436.154	1010.6	1679.08	330.792	471.037	0.811569	0.0144514	-0.23874	0.204786	-2.36961	-1.81628	-0.412218	0.320234	-2.02344	-1.51352
3110039M20Rik	RIKEN cDNA 3110039M20 gene [Source:MGI Symbol;Acc:MGI:1914543]	NA	NA	0	NA	NA	NA	0	NA	NA	0	0	0	NA	55.4444	53.8245	58.6082	52.1773	74.7752	68.9238	59.9549	60.2701	0.76027	0.0285477	0.0212306	-0.0215477	0.101293	-0.0663883	0.0575822	-0.0599763	-0.2611	-0.253535
4930427A07Rik	NA	NA	NA	0	NA	NA	NA	0	NA	NA	0	0	0	NA	189.38	224.492	125.467	109.456	167.202	207.755	101.424	113.35	0.862938	0.00579351	-0.127899	0.117478	-0.72187	-0.918837	-0.165133	0.148158	-0.886335	-0.725938
4930452B06Rik	NA	NA	NA	0	NA	NA	NA	0	NA	NA	0	0	0	NA	88.4268	110.884	79.1768	77.0413	97.1235	106.917	64.0266	69.6316	0.935632	0.000634956	-0.172466	0.154033	-0.331873	-0.371319	-0.0709611	0.0676338	-0.672111	-0.55104
4930453N24Rik	RIKEN cDNA 4930453N24 gene [Source:MGI Symbol;Acc:MGI:1914859]	NA	NA	0	NA	NA	NA	0	NA	NA	0	0	0	NA	980.082	998.566	907.264	973.932	997.347	1138.1	877.82	982.683	0.759767	0.0287159	-0.013541	0.0134151	-0.124921	-0.0226215	-0.0983718	0.0920902	-0.282541	-0.119741
4930511M06Rik	RIKEN cDNA 4930511M06 gene [Source:MGI Symbol;Acc:MGI:1922334]	NA	NA	0	NA	NA	NA	0	NA	NA	0	0	0	NA	11.6818	11.983	11.4809	10.9279	11.4671	11.789	10.9348	10.8487	0.844178	0.00838759	-0.0184759	0.0182423	-0.0435095	-0.11473	-0.0201073	0.0198309	-0.0886804	-0.100082
4930549G23Rik	RIKEN cDNA 4930549G23 gene [Source:MGI Symbol;Acc:MGI:1922536]	NA	NA	0	NA	NA	NA	0	NA	NA	0	0	0	NA	12.5257	12.1651	11.9323	11.9665	13.6897	12.9088	12.974	11.6935	0.711861	0.0476265	0.020917	-0.0212248	-0.0491054	-0.0449724	0.0417458	-0.0429898	-0.0357275	-0.185645
4931428F04Rik	RIKEN cDNA 4931428F04 gene [Source:MGI Symbol;Acc:MGI:1921606]	NA	NA	0	NA	NA	NA	0	NA	NA	0	0	0	NA	144.797	135.609	124.161	117.023	155.323	147.237	123.222	105.037	0.927846	0.00088905	0.0465149	-0.0480648	-0.175301	-0.260724	0.038051	-0.0390819	-0.295969	-0.526324
4933404O12Rik	RIKEN cDNA 4933404O12 gene [Source:MGI Symbol;Acc:MGI:1914002]	NA	NA	0	NA	NA	NA	0	NA	NA	0	0	0	NA	132.111	181.291	113.904	134.587	133.073	139.023	107.518	86.5737	0.799914	0.0171408	-0.246263	0.210292	-0.460201	-0.219475	-0.0318999	0.0312098	-0.339538	-0.652112
4933412E12Rik	RIKEN cDNA 4933412E12 gene [Source:MGI Symbol;Acc:MGI:1918336]	NA	NA	0	NA	NA	NA	0	NA	NA	0	0	0	NA	233.738	263.5	208.04	204.424	247.057	248.975	200.169	205.781	0.879962	0.0039442	-0.0890446	0.0838667	-0.257074	-0.282371	-0.00559079	0.00556921	-0.309214	-0.269323
5430416N02Rik	RIKEN cDNA 5430416N02 gene [Source:MGI Symbol;Acc:MGI:1918676]	NA	NA	0	NA	NA	NA	0	NA	NA	0	0	0	NA	202.155	212.48	178.845	180.878	203.988	214.107	178.302	183.615	0.878649	0.00407084	-0.0363808	0.0354859	-0.213136	-0.196829	-0.0353441	0.0344989	-0.229505	-0.18715
5730508B09Rik	NA	NA	NA	0	NA	NA	NA	0	NA	NA	0	0	0	NA	82.3402	74.7485	77.0894	76.0562	77.0207	83.1712	68.8911	75.0007	0.729509	0.0399824	0.0680897	-0.0714631	-0.0269746	-0.0464412	-0.0564823	0.0543541	-0.217412	-0.0948246
5930403L14Rik	NA	NA	NA	0	NA	NA	NA	0	NA	NA	0	0	0	NA	59.2443	72.3022	63.6481	56.6202	69.8374	65.5164	52.9536	57.1274	0.798725	0.0174316	-0.150824	0.136538	-0.0473834	-0.216184	0.0453357	-0.0468067	-0.353936	-0.24448
6330549D23Rik	RIKEN cDNA 6330549D23 gene [Source:MGI Symbol;Acc:MGI:2442586]	NA	NA	0	NA	NA	NA	0	NA	NA	0	0	0	NA	102.108	109.505	103.182	103.677	121.265	125.665	116.998	100.336	0.734926	0.0377968	-0.0513317	0.0495678	-0.036238	-0.0293338	-0.0259356	0.0254776	-0.0776169	-0.299265
6430573F11Rik	NA	NA	NA	0	NA	NA	NA	0	NA	NA	0	0	0	NA	2.52796	2.55363	2.55065	2.50303	2.58316	2.54885	2.48276	2.52378	0.770587	0.0252297	-0.00730715	0.00727033	0.00558446	-0.0216075	0.00961192	-0.00967639	-0.0475814	-0.0239415
6720489N17Rik	RIKEN cDNA 6720489N17 gene [Source:MGI Symbol;Acc:MGI:2443901]	NA	NA	0	NA	NA	NA	0	NA	NA	0	0	0	NA	76.7112	100.948	81.9542	92.0589	99.8198	107.559	76.5502	83.7736	0.722173	0.0430618	-0.211605	0.184501	-0.116225	0.0515145	-0.054867	0.0528566	-0.437789	-0.307699
6820408C15Rik	RIKEN cDNA 6820408C15 gene [Source:MGI Symbol;Acc:MGI:3045333]	NA	NA	0	NA	NA	NA	0	NA	NA	0	0	0	NA	4.12368	4.10816	4.02803	4.01698	4.13314	4.12952	3.95296	3.92005	0.992493	1.05178e-06	0.002717	-0.00272213	-0.0311408	-0.0351044	0.000631857	-0.000632134	-0.0636723	-0.0757329
9430015G10Rik	RIKEN cDNA 9430015G10 gene [Source:MGI Symbol;Acc:MGI:2444364]	NA	NA	0	NA	NA	NA	0	NA	NA	0	0	0	NA	254.989	296.464	209.115	212.292	243.239	266.577	217.634	189.316	0.772358	0.0246857	-0.112803	0.104619	-0.398938	-0.37719	-0.0676018	0.0645754	-0.228075	-0.429182
A430035B10Rik	RIKEN cDNA A430035B10 gene [Source:MGI Symbol;Acc:MGI:2443789]	NA	NA	0	NA	NA	NA	0	NA	NA	0	0	0	NA	7.82664	8.08642	7.59653	7.55593	7.64004	7.77729	7.38192	7.38203	0.800506	0.0169972	-0.0237459	0.0233614	-0.0667986	-0.0745307	-0.0129006	0.0127863	-0.0624844	-0.0624622
A630066F11Rik	NA	NA	NA	0	NA	NA	NA	0	NA	NA	0	0	0	NA	33.5641	34.5782	34.437	35.3143	33.1694	34.8373	29.6464	30.518	0.742596	0.0348296	-0.0216323	0.0213127	0.0154071	0.0517025	-0.0358233	0.0349553	-0.197823	-0.156019
A930017M01Rik	RIKEN cDNA A930017M01 gene [Source:MGI Symbol;Acc:MGI:2685151]	NA	NA	0	NA	NA	NA	0	NA	NA	0	0	0	NA	1.39987	1.38205	1.37557	1.39851	1.41358	1.41274	1.37583	1.37583	0.83092	0.0106037	0.00921642	-0.00927568	-0.0160526	0.00781095	0.000425106	-0.000425232	-0.0386185	-0.0386177
AI450353	NA	NA	NA	0	NA	NA	NA	0	NA	NA	0	0	0	NA	41.4976	56.9528	38.8798	40.2063	49.1613	50.8701	41.6433	37.5489	0.735583	0.0375368	-0.246368	0.210369	-0.340378	-0.291976	-0.0248586	0.0244376	-0.264297	-0.413609
AU022252	expressed sequence AU022252 [Source:MGI Symbol;Acc:MGI:2140466]	NA	NA	0	NA	NA	NA	0	NA	NA	0	0	0	NA	469.075	499.608	430.22	435.049	478.688	515.424	402.665	460.815	0.80905	0.0150084	-0.0462055	0.0447715	-0.170951	-0.154849	-0.0543217	0.0523504	-0.303828	-0.109221
AY358078	cDNA sequence AY358078 [Source:MGI Symbol;Acc:MGI:2682312]	NA	NA	0	NA	NA	NA	0	NA	NA	0	0	0	NA	15.3671	16.0122	14.8381	14.5546	14.6324	17.3923	14.1107	14.342	0.734535	0.0379521	-0.0299677	0.0293579	-0.0805044	-0.108334	-0.130015	0.119261	-0.182391	-0.158943
Aadat	aminoadipate aminotransferase [Source:MGI Symbol;Acc:MGI:1345167]	NA	NA	0	NA	NA	NA	0	NA	NA	0	0	0	NA	14.8006	15.2631	16.0569	14.7458	16.8514	18.0285	15.4597	15.1122	0.706931	0.0499076	-0.0223666	0.0220251	0.0951725	-0.0277115	-0.0495273	0.0478834	-0.173882	-0.206679
Aarsd1	alanyl-tRNA synthetase domain containing 1 [Source:MGI Symbol;Acc:MGI:1916934]	NA	NA	0	NA	NA	NA	0	NA	NA	0	0	0	NA	396.324	402.736	323.96	352.237	398.907	356.386	321.88	292.181	0.87329	0.00461489	-0.0116245	0.0115316	-0.302486	-0.181757	0.079017	-0.0835969	-0.230514	-0.370173
Aatf	apoptosis antagonizing transcription factor [Source:MGI Symbol;Acc:MGI:1929608]	NA	NA	0	NA	NA	NA	0	NA	NA	0	0	0	NA	1011.8	1122.27	927.484	943.57	1089.72	1084.07	989.455	991.225	0.70706	0.0498471	-0.0766852	0.072814	-0.202216	-0.177408	0.00374226	-0.00375199	-0.135509	-0.132931
Abcb6	ATP-binding cassette/ sub-family B (MDR/TAP)/ member 6 [Source:MGI Symbol;Acc:MGI:1921354]	NA	NA	0	NA	NA	NA	0	NA	NA	0	0	0	NA	224.539	231.18	172.706	196.849	238.706	240.907	139.279	141.122	0.98238	1.34961e-05	-0.0211798	0.0208734	-0.399829	-0.211054	-0.00663505	0.00660468	-0.783895	-0.764929
Abcb7	ATP-binding cassette/ sub-family B (MDR/TAP)/ member 7 [Source:MGI Symbol;Acc:MGI:109533]	NA	NA	0	NA	NA	NA	0	NA	NA	0	0	0	NA	649.71	669.95	544.128	559.742	537.907	621.416	459.097	469.642	0.896931	0.00253004	-0.022298	0.0219586	-0.278149	-0.237331	-0.107853	0.100348	-0.336411	-0.30365
Abracl	ABRA C-terminal like [Source:MGI Symbol;Acc:MGI:1920362]	NA	NA	0	NA	NA	NA	0	NA	NA	0	0	0	NA	2852.44	3041.1	1821.26	1691.49	2580.2	3381.95	1617.94	2411.04	0.728603	0.0403552	-0.0469376	0.0454585	-0.694199	-0.800844	-0.208348	0.182022	-0.881677	-0.306175
Acaca	acetyl-Coenzyme A carboxylase alpha [Source:MGI Symbol;Acc:MGI:108451]	NA	NA	0	NA	NA	NA	0	NA	NA	0	0	0	NA	3498.08	3707.88	3106.83	3189.2	3535.7	3758.44	3224.12	3019.14	0.882547	0.00370229	-0.0426261	0.0414027	-0.213745	-0.175998	-0.0447435	0.0433975	-0.177831	-0.272602
Acads	acyl-Coenzyme A dehydrogenase/ short chain [Source:MGI Symbol;Acc:MGI:87868]	NA	NA	0	NA	NA	NA	0	NA	NA	0	0	0	NA	745.37	843.549	730.125	693.538	807.076	743.342	660.263	662.565	0.852714	0.00713144	-0.0920169	0.0864982	-0.12183	-0.195999	0.0581192	-0.0605591	-0.231545	-0.226523
Acap3	ArfGAP with coiled-coil/ ankyrin repeat and PH domains 3 [Source:MGI Symbol;Acc:MGI:2153589]	NA	NA	0	NA	NA	NA	0	NA	NA	0	0	0	NA	1439.8	1450.29	1451.87	1334.97	1562.43	1553.51	1480.6	1461.31	0.748655	0.0325895	-0.00524785	0.00522883	0.00680201	-0.11431	0.00412397	-0.00413579	-0.0734839	-0.0924061
Acat2	acetyl-Coenzyme A acetyltransferase 2 [Source:MGI Symbol;Acc:MGI:87871]	NA	NA	0	NA	NA	NA	0	NA	NA	0	0	0	NA	1009.29	1232.29	842.123	941.76	1114.56	1349.67	807.79	838.992	0.910351	0.00168234	-0.15117	0.136821	-0.412414	-0.251085	-0.144657	0.131465	-0.609084	-0.554407
Acat3	acetyl-Coenzyme A acetyltransferase 3 [Source:MGI Symbol;Acc:MGI:109182]	NA	NA	0	NA	NA	NA	0	NA	NA	0	0	0	NA	152.207	187.204	160.029	155.344	174.75	210.03	143.382	159.317	0.773219	0.0244236	-0.157001	0.14158	-0.0846974	-0.127561	-0.138743	0.126563	-0.424169	-0.272135
Aco1	aconitase 1 [Source:MGI Symbol;Acc:MGI:87879]	NA	NA	0	NA	NA	NA	0	NA	NA	0	0	0	NA	2180.08	2387.25	1873.99	2031.14	2194.74	2408.65	1805.77	1990.24	0.851665	0.00727887	-0.0669696	0.0639983	-0.28524	-0.169058	-0.0686462	0.0655277	-0.350081	-0.209751
Acsf3	acyl-CoA synthetase family member 3 [Source:MGI Symbol;Acc:MGI:2182591]	NA	NA	0	NA	NA	NA	0	NA	NA	0	0	0	NA	221.868	226.931	190.305	218.932	215.161	206.577	189.331	188.293	0.768341	0.0259305	-0.0163667	0.0161831	-0.237756	-0.0355879	0.0290701	-0.029668	-0.155434	-0.163367
Acss2os	acyl-CoA synthetase short-chain family member 2/ opposite strand [Source:MGI Symbol;Acc:MGI:1922195]	NA	NA	0	NA	NA	NA	0	NA	NA	0	0	0	NA	1.54748	1.55986	1.55591	1.54552	1.59741	1.59956	1.55823	1.55824	0.878046	0.00412985	-0.00575858	0.00573569	0.0020782	-0.00759146	-0.000969929	0.000969278	-0.0367942	-0.0367874
Acta1	actin/ alpha 1/ skeletal muscle [Source:MGI Symbol;Acc:MGI:87902]	NA	NA	0	NA	NA	NA	0	NA	NA	0	0	0	NA	1926.73	2639.84	1112.3	570.16	1725.03	4388.21	709.325	1639.38	0.724583	0.0420346	-0.244957	0.20934	-1.03756	-2.00167	-0.825316	0.521696	-2.10742	-0.898785
Adam12	a disintegrin and metallopeptidase domain 12 (meltrin alpha) [Source:MGI Symbol;Acc:MGI:105378]	NA	NA	0	NA	NA	NA	0	NA	NA	0	0	0	NA	4023.67	4252.41	2945.08	3014.11	4343.73	4201.97	3176.18	3283.7	0.84445	0.00834555	-0.0404368	0.0393343	-0.490642	-0.457215	0.0237355	-0.0241326	-0.427908	-0.379875
Adcy3	adenylate cyclase 3 [Source:MGI Symbol;Acc:MGI:99675]	NA	NA	0	NA	NA	NA	0	NA	NA	0	0	0	NA	1198.93	1215.23	1092.49	1235.31	1186.7	1256.03	1010.28	1059.78	0.848159	0.00778563	-0.00977119	0.00970546	-0.143904	0.0333557	-0.0415387	0.0403761	-0.273739	-0.204721
Adprm	ADP-ribose/CDP-alcohol diphosphatase/ manganese dependent [Source:MGI Symbol;Acc:MGI:1913608]	NA	NA	0	NA	NA	NA	0	NA	NA	0	0	0	NA	367.155	355.574	328.603	330.598	339.929	372.59	337.238	323.437	0.708817	0.0490276	0.0229348	-0.0233053	-0.137109	-0.128374	-0.0676948	0.0646602	-0.0791597	-0.139444
Afg3l1	AFG3-like AAA ATPase 1 [Source:MGI Symbol;Acc:MGI:1928277]	NA	NA	0	NA	NA	NA	0	NA	NA	0	0	0	NA	1420.87	1505.67	1257.99	1431.16	1365.04	1489.77	1205.27	1303.72	0.762218	0.0279016	-0.0424206	0.0412088	-0.218075	-0.0320093	-0.0644495	0.061693	-0.244035	-0.13076
Agl	amylo-1/6-glucosidase/ 4-alpha-glucanotransferase [Source:MGI Symbol;Acc:MGI:1924809]	NA	NA	0	NA	NA	NA	0	NA	NA	0	0	0	NA	2543.59	2722.25	2610.96	2507.9	3080.16	2895.98	2693.5	2692.38	0.835732	0.00976103	-0.0497983	0.0481366	-0.012085	-0.0701867	0.0437912	-0.0451622	-0.149734	-0.150333
Agpat6	NA	NA	NA	0	NA	NA	NA	0	NA	NA	0	0	0	NA	3670.81	3619.03	3234.59	3356.26	3370.27	3514.55	3178.9	3235.28	0.733668	0.0382978	0.0102107	-0.0102835	-0.172302	-0.119035	-0.0305551	0.0299213	-0.114892	-0.0895273
Ahcy	S-adenosylhomocysteine hydrolase [Source:MGI Symbol;Acc:MGI:87968]	NA	NA	0	NA	NA	NA	0	NA	NA	0	0	0	NA	1624.95	1972.05	1297.51	1276.69	1581.86	1723.18	1270.68	1310.5	0.747207	0.0331164	-0.146397	0.132901	-0.471049	-0.494386	-0.0630426	0.0604027	-0.379062	-0.334552
Aimp1	aminoacyl tRNA synthetase complex-interacting multifunctional protein 1 [Source:MGI Symbol;Acc:MGI:102774]	NA	NA	0	NA	NA	NA	0	NA	NA	0	0	0	NA	1563.13	1681.64	1500.62	1571.1	1620.72	1800.35	1465.21	1539.05	0.822915	0.0121044	-0.0536801	0.0517542	-0.112555	-0.0463411	-0.0778121	0.0738292	-0.223345	-0.152411
Akr1c14	aldo-keto reductase family 1/ member C14 [Source:MGI Symbol;Acc:MGI:2145458]	NA	NA	0	NA	NA	NA	0	NA	NA	0	0	0	NA	81.9706	68.5033	52.8662	52.6446	77.4753	62.2515	49.648	49.6538	0.825061	0.0116898	0.123665	-0.135268	-0.509095	-0.515157	0.149199	-0.166428	-0.492801	-0.492632
Alg5	asparagine-linked glycosylation 5 (dolichyl-phosphate beta-glucosyltransferase) [Source:MGI Symbol;Acc:MGI:1913498]	NA	NA	0	NA	NA	NA	0	NA	NA	0	0	0	NA	1178.13	1203.93	1010.47	1118.65	1092.91	1217.19	1013.04	1056.71	0.733095	0.0385272	-0.0157116	0.0155423	-0.237181	-0.0904518	-0.0797849	0.0756028	-0.189261	-0.128382
Alg8	asparagine-linked glycosylation 8 (alpha-1/3-glucosyltransferase) [Source:MGI Symbol;Acc:MGI:2141959]	NA	NA	0	NA	NA	NA	0	NA	NA	0	0	0	NA	473.733	478.684	337.661	306.032	453.199	483.282	295.398	341.824	0.875409	0.00439449	-0.00751889	0.00747991	-0.496019	-0.637911	-0.0471057	0.0456162	-0.66459	-0.453993
Alg9	asparagine-linked glycosylation 9 (alpha 1/2 mannosyltransferase) [Source:MGI Symbol;Acc:MGI:1924753]	NA	NA	0	NA	NA	NA	0	NA	NA	0	0	0	NA	703.668	720.087	652.665	599.52	735.62	673.76	604.383	641.216	0.782462	0.02172	-0.0167344	0.0165425	-0.125286	-0.24782	0.0619721	-0.0647541	-0.221525	-0.136178
Alms1	ALMS1/ centrosome and basal body associated [Source:MGI Symbol;Acc:MGI:1934606]	NA	NA	0	NA	NA	NA	0	NA	NA	0	0	0	NA	680.913	741.51	577.953	531.566	630.979	637.364	547.338	484.062	0.791146	0.019357	-0.062808	0.0601873	-0.299327	-0.420028	-0.00728102	0.00724446	-0.21244	-0.38968
Amh	anti-Mullerian hormone [Source:MGI Symbol;Acc:MGI:88006]	NA	NA	0	NA	NA	NA	0	NA	NA	0	0	0	NA	5.93118	6.15155	6.14576	5.81226	6.21532	6.21866	5.71843	5.81371	0.816011	0.0135014	-0.0265552	0.0260752	0.0247175	-0.0557754	-0.000386873	0.000386769	-0.120597	-0.0967565
Amn1	antagonist of mitotic exit network 1 [Source:MGI Symbol;Acc:MGI:2442933]	NA	NA	0	NA	NA	NA	0	NA	NA	0	0	0	NA	237.053	237.679	256.245	244.835	255.242	270.453	213.495	222.709	0.706974	0.0498877	-0.00190165	0.00189914	0.11041	0.0446964	-0.0423613	0.0411529	-0.300027	-0.239067
Ankle1	ankyrin repeat and LEM domain containing 1 [Source:MGI Symbol;Acc:MGI:1918775]	NA	NA	0	NA	NA	NA	0	NA	NA	0	0	0	NA	40.063	46.9916	31.1575	28.47	38.274	45.3908	30.3232	30.0692	0.803852	0.0161999	-0.11965	0.110483	-0.48234	-0.612475	-0.128257	0.11778	-0.464201	-0.476336
Ankrd26	ankyrin repeat domain 26 [Source:MGI Symbol;Acc:MGI:1917887]	NA	NA	0	NA	NA	NA	0	NA	NA	0	0	0	NA	682.582	780.968	635.643	663.55	671.287	802.775	568.213	580.082	0.871243	0.00483437	-0.100398	0.0938634	-0.203182	-0.141194	-0.134796	0.123271	-0.375294	-0.345468
Ankrd27	ankyrin repeat domain 27 (VPS9 domain) [Source:MGI Symbol;Acc:MGI:2444103]	NA	NA	0	NA	NA	NA	0	NA	NA	0	0	0	NA	2051.82	2170.14	1749.35	1670.24	2204.26	2197.57	1831.98	1842.24	0.838356	0.00932021	-0.0410074	0.0398739	-0.271091	-0.337855	0.00219026	-0.00219359	-0.264702	-0.256646
Ankrd9	ankyrin repeat domain 9 [Source:MGI Symbol;Acc:MGI:1921501]	NA	NA	0	NA	NA	NA	0	NA	NA	0	0	0	NA	160.56	161.937	138.362	140.684	163.244	176.595	131.933	160.218	0.758135	0.0292657	-0.00617391	0.0061476	-0.220839	-0.19683	-0.057821	0.0555927	-0.365038	-0.0848082
Anln	anillin/ actin binding protein [Source:MGI Symbol;Acc:MGI:1920174]	NA	NA	0	NA	NA	NA	0	NA	NA	0	0	0	NA	3349.04	4390.18	903.29	1078.32	2634.18	4276.68	884.057	1422.76	0.801064	0.0168628	-0.208439	0.182091	-2.09893	-1.8434	-0.391513	0.307627	-1.96665	-1.28017
Anp32a	acidic (leucine-rich) nuclear phosphoprotein 32 family/ member A [Source:MGI Symbol;Acc:MGI:108447]	NA	NA	0	NA	NA	NA	0	NA	NA	0	0	0	NA	2278.81	2429.76	1801.76	2023.4	2443.3	2477.51	1999.59	1830.67	0.899845	0.00232679	-0.0470097	0.0455261	-0.385884	-0.21851	-0.0100638	0.00999406	-0.299191	-0.426527
Anp32b	acidic (leucine-rich) nuclear phosphoprotein 32 family/ member B [Source:MGI Symbol;Acc:MGI:1914878]	NA	NA	0	NA	NA	NA	0	NA	NA	0	0	0	NA	3876.99	5312.52	2830.66	3969.24	4427.78	4887.18	3119.89	3631.09	0.715962	0.0457778	-0.245052	0.209409	-0.698849	-0.211126	-0.0729659	0.0694526	-0.578053	-0.359145
Ap1ar	adaptor-related protein complex 1 associated regulatory protein [Source:MGI Symbol;Acc:MGI:2384822]	NA	NA	0	NA	NA	NA	0	NA	NA	0	0	0	NA	1274.38	1267.39	1118.4	1033.01	1189.43	1349.16	1091.14	1085.85	0.794553	0.0184757	0.00395962	-0.00397051	-0.184395	-0.298975	-0.0937582	0.0880351	-0.218198	-0.22521
Ap1g2	adaptor protein complex AP-1/ gamma 2 subunit [Source:MGI Symbol;Acc:MGI:1328307]	NA	NA	0	NA	NA	NA	0	NA	NA	0	0	0	NA	148.564	163.457	153.056	138.384	155.126	173.037	131.827	125.339	0.883518	0.00361391	-0.0705586	0.067268	-0.0275897	-0.172973	-0.0809738	0.0766695	-0.315768	-0.388581
Ap4s1	adaptor-related protein complex AP-4/ sigma 1 [Source:MGI Symbol;Acc:MGI:1337065]	NA	NA	0	NA	NA	NA	0	NA	NA	0	0	0	NA	209.621	199.175	205.124	195.104	204.978	218.475	184.744	183.727	0.862362	0.00586425	0.0364036	-0.037346	0.00511409	-0.0671362	-0.046736	0.0452694	-0.196674	-0.204637
Apitd1	NA	NA	NA	0	NA	NA	NA	0	NA	NA	0	0	0	NA	47.1914	58.4704	37.033	45.5177	49.484	57.8407	40.9164	42.3507	0.750136	0.0320556	-0.162859	0.146325	-0.512572	-0.214953	-0.116948	0.108175	-0.391232	-0.341526
Apool	apolipoprotein O-like [Source:MGI Symbol;Acc:MGI:1915367]	NA	NA	0	NA	NA	NA	0	NA	NA	0	0	0	NA	367.193	407.345	355.916	384.949	399.541	420.053	330.961	357.472	0.844444	0.00834658	-0.0767968	0.0729146	-0.121797	-0.0086675	-0.0365656	0.0356617	-0.308247	-0.197078
Arhgap11a	Rho GTPase activating protein 11A [Source:MGI Symbol;Acc:MGI:2444300]	NA	NA	0	NA	NA	NA	0	NA	NA	0	0	0	NA	1288.89	1848.6	775.321	917.802	1101.41	1838.76	846.24	913.235	0.719341	0.0442877	-0.283481	0.236822	-1.01675	-0.77336	-0.416546	0.322832	-0.796762	-0.686842
Arhgap19	Rho GTPase activating protein 19 [Source:MGI Symbol;Acc:MGI:1918335]	NA	NA	0	NA	NA	NA	0	NA	NA	0	0	0	NA	275.473	360.574	149.211	187.479	214.957	296.509	129.114	138.964	0.84699	0.00795941	-0.207224	0.181163	-1.09178	-0.762402	-0.250591	0.213438	-0.985992	-0.879927
Arhgef39	Rho guanine nucleotide exchange factor (GEF) 39 [Source:MGI Symbol;Acc:MGI:3036286]	NA	NA	0	NA	NA	NA	0	NA	NA	0	0	0	NA	46.8825	61.811	41.6496	37.7968	53.5953	56.8735	41.1363	37.5633	0.834274	0.0100117	-0.213145	0.18567	-0.383891	-0.523931	-0.0434611	0.0421901	-0.425154	-0.556244
Arhgef40	Rho guanine nucleotide exchange factor (GEF) 40 [Source:MGI Symbol;Acc:MGI:2685515]	NA	NA	0	NA	NA	NA	0	NA	NA	0	0	0	NA	5023.3	4957.38	4440.66	4140.82	5210.86	4939.39	4335.66	4539.43	0.816871	0.0133221	0.00949627	-0.00955919	-0.168365	-0.269221	0.0380785	-0.0391108	-0.227193	-0.160931
Arl10	ADP-ribosylation factor-like 10 [Source:MGI Symbol;Acc:MGI:1930788]	NA	NA	0	NA	NA	NA	0	NA	NA	0	0	0	NA	200.169	226.394	200.219	194.816	201.415	206.801	184.386	190.845	0.714402	0.0464759	-0.0915408	0.0860773	-0.0911839	-0.130648	-0.0191586	0.0189075	-0.146604	-0.0969305
Armcx2	armadillo repeat containing/ X-linked 2 [Source:MGI Symbol;Acc:MGI:1914666]	NA	NA	0	NA	NA	NA	0	NA	NA	0	0	0	NA	3944.48	3509.85	3536.72	3896.3	3880.93	3430.82	2700.16	2523.49	0.822573	0.0121715	0.0817564	-0.0866693	-0.0756664	0.064025	0.0861872	-0.0916651	-0.43717	-0.534799
Armcx4	armadillo repeat containing/ X-linked 4 [Source:MGI Symbol;Acc:MGI:2147887]	NA	NA	0	NA	NA	NA	0	NA	NA	0	0	0	NA	2084.03	1876.24	1454.94	1440.54	1985.27	1857.22	1700.1	1099.42	0.762096	0.0279417	0.0737772	-0.0777543	-0.444638	-0.458988	0.0472928	-0.0488958	-0.176422	-0.805298
Armt1	acidic residue methyltransferase 1 [Source:MGI Symbol;Acc:MGI:1920669]	NA	NA	0	NA	NA	NA	0	NA	NA	0	0	0	NA	520.288	538.327	446.329	492.454	504.756	554.924	469.369	442.645	0.837274	0.00950045	-0.0247955	0.0243765	-0.246001	-0.104118	-0.0699711	0.0667338	-0.174833	-0.259407
Arrb1	arrestin/ beta 1 [Source:MGI Symbol;Acc:MGI:99473]	NA	NA	0	NA	NA	NA	0	NA	NA	0	0	0	NA	638.832	599.987	450.787	521.077	549.892	592.525	392.153	459.193	0.875751	0.00435962	0.0445428	-0.045962	-0.458447	-0.249395	-0.0548694	0.0528588	-0.542601	-0.314917
Arxes1	adipocyte-related X-chromosome expressed sequence 1 [Source:MGI Symbol;Acc:MGI:1923469]	NA	NA	0	NA	NA	NA	0	NA	NA	0	0	0	NA	357.008	445.34	385.146	409.015	329.838	331.956	264.686	284.435	0.706861	0.0499408	-0.16827	0.150678	-0.058824	0.0279257	-0.00462501	0.00461023	-0.322101	-0.218281
As3mt	arsenite methyltransferase [Source:MGI Symbol;Acc:MGI:1929882]	NA	NA	0	NA	NA	NA	0	NA	NA	0	0	0	NA	56.1325	63.7147	60.7172	66.2655	67.5434	70.8297	48.2632	51.6954	0.751234	0.0316636	-0.0942881	0.088502	0.0189823	0.145134	-0.034676	0.0338621	-0.519569	-0.420457
Asb15	ankyrin repeat and SOCS box-containing 15 [Source:MGI Symbol;Acc:MGI:1926160]	NA	NA	0	NA	NA	NA	0	NA	NA	0	0	0	NA	2.4082	2.40998	2.43013	2.38462	2.44528	2.42836	2.4044	2.38491	0.719266	0.0443205	-0.000534786	0.000534588	0.0125444	-0.0147297	0.00500027	-0.00501766	-0.0193176	-0.0310653
Asf1a	anti-silencing function 1A histone chaperone [Source:MGI Symbol;Acc:MGI:1913653]	NA	NA	0	NA	NA	NA	0	NA	NA	0	0	0	NA	477.037	528.48	437.783	539.412	510.717	544.492	403.165	426.711	0.789595	0.0197665	-0.0757641	0.071983	-0.199651	0.101521	-0.0469334	0.0454545	-0.388087	-0.306197
Asf1b	anti-silencing function 1B histone chaperone [Source:MGI Symbol;Acc:MGI:1914179]	NA	NA	0	NA	NA	NA	0	NA	NA	0	0	0	NA	189.441	297.174	82.9053	104.853	157.317	266.198	87.5744	120.818	0.720063	0.0439731	-0.361034	0.288528	-1.55324	-1.21442	-0.428742	0.330089	-1.27383	-0.809581
Asl	argininosuccinate lyase [Source:MGI Symbol;Acc:MGI:88084]	NA	NA	0	NA	NA	NA	0	NA	NA	0	0	0	NA	512.521	535.406	487.066	433.789	447.158	579.429	341.351	432.116	0.782802	0.0216242	-0.0318556	0.0311673	-0.10535	-0.272474	-0.198999	0.174848	-0.588529	-0.248366
Aspm	abnormal spindle microtubule assembly [Source:MGI Symbol;Acc:MGI:1334448]	NA	NA	0	NA	NA	NA	0	NA	NA	0	0	0	NA	1184.23	1491.15	374.88	486.799	1050.93	1397.81	414.139	372.432	0.885031	0.00347907	-0.175792	0.15668	-1.83524	-1.45835	-0.220371	0.191128	-1.56385	-1.71699
Atad2	ATPase family/ AAA domain containing 2 [Source:MGI Symbol;Acc:MGI:1917722]	NA	NA	0	NA	NA	NA	0	NA	NA	0	0	1		1997.72	2819.14	931.264	1131.96	1881.5	2690.02	1083.4	1268.25	0.76705	0.0263388	-0.26974	0.227163	-1.37083	-1.08927	-0.280793	0.234945	-1.07711	-0.849831
Atad5	ATPase family/ AAA domain containing 5 [Source:MGI Symbol;Acc:MGI:2442925]	NA	NA	0	NA	NA	NA	0	NA	NA	0	0	0	NA	502.414	607.42	310.308	344.303	477.428	505.779	327.5	300.185	0.825213	0.0116608	-0.143394	0.130422	-0.83857	-0.688592	-0.042213	0.0410129	-0.586002	-0.711641
Atf4	activating transcription factor 4 [Source:MGI Symbol;Acc:MGI:88096]	NA	NA	0	NA	NA	NA	0	NA	NA	0	0	0	NA	6277	6163.72	5524.68	5525.44	6406.95	5720.12	5670.32	4492.05	0.762773	0.0277194	0.0130769	-0.0131965	-0.171107	-0.170909	0.079479	-0.0841142	-0.0967285	-0.432783
Athl1	NA	NA	NA	0	NA	NA	NA	0	NA	NA	0	0	0	NA	555.913	562.389	528.317	542.782	622.396	506.389	482.264	434.461	0.783884	0.0213214	-0.00837901	0.00833063	-0.081834	-0.0428653	0.141135	-0.156454	-0.226877	-0.377473
Atn1	atrophin 1 [Source:MGI Symbol;Acc:MGI:104725]	NA	NA	0	NA	NA	NA	0	NA	NA	0	0	0	NA	5560.25	5449.26	5196.14	5086.55	5783.86	5795.07	5629.29	5105.15	0.767386	0.0262321	0.0144718	-0.0146184	-0.0832387	-0.113992	-0.00139715	0.0013958	-0.0404787	-0.181477
Aurkb	aurora kinase B [Source:MGI Symbol;Acc:MGI:107168]	NA	NA	0	NA	NA	NA	0	NA	NA	0	0	1		268.704	438.19	104.377	145.303	248.052	335.692	113.712	139.22	0.773456	0.024352	-0.395475	0.310062	-1.75969	-1.28243	-0.234695	0.201803	-1.35995	-1.06797
Axin1	axin 1 [Source:MGI Symbol;Acc:MGI:1096327]	PANCAN_LIHC	tsg	1	colorectal_endometrial_prostate_hepatocellularcarcinoma_hepatoblastoma_sporadicmedulloblastoma	TSG	D_Mis_N_F_S	1	ESCA_GBM_HC	LoF	1	1	0	NA	1626.74	1746.28	1457.25	1533.91	1633.42	1644.71	1442.75	1547.39	0.719983	0.044008	-0.0520594	0.0502461	-0.210789	-0.136825	-0.00497465	0.00495755	-0.184056	-0.0830371
B230216N24Rik	RIKEN cDNA B230216N24 gene [Source:MGI Symbol;Acc:MGI:1925853]	NA	NA	0	NA	NA	NA	0	NA	NA	0	0	0	NA	14.0459	13.3528	12.887	12.5707	13.8456	13.8958	13.4726	12.3746	0.732764	0.0386601	0.036039	-0.0369624	-0.0881907	-0.124045	-0.00261204	0.00260732	-0.0420103	-0.164665
B3glct	beta-3-glucosyltransferase [Source:MGI Symbol;Acc:MGI:2685903]	NA	NA	0	NA	NA	NA	0	NA	NA	0	0	0	NA	1137.9	1154.87	1085.59	1141.66	1303.71	1130.31	1089.9	1061.91	0.760567	0.0284486	-0.0107166	0.0106376	-0.078603	-0.00594896	0.0992797	-0.10662	-0.159143	-0.19668
B3gnt5	UDP-GlcNAc:betaGal beta-1/3-N-acetylglucosaminyltransferase 5 [Source:MGI Symbol;Acc:MGI:2137302]	NA	NA	0	NA	NA	NA	0	NA	NA	0	0	0	NA	543.879	422.269	235.359	250.856	520.001	422.308	201.205	201.989	0.936092	0.000621653	0.171042	-0.194082	-1.03738	-0.945383	0.142315	-0.157906	-1.22754	-1.22192
B4galt2	UDP-Gal:betaGlcNAc beta 1/4- galactosyltransferase/ polypeptide 2 [Source:MGI Symbol;Acc:MGI:1858493]	NA	NA	0	NA	NA	NA	0	NA	NA	0	0	0	NA	1368.16	1383.24	1176.43	1351.96	1351.22	1318.27	1074.5	1175.62	0.861938	0.00591661	-0.00792731	0.00788399	-0.225757	-0.0251135	0.0177014	-0.0179213	-0.312892	-0.183138
B4galt6	UDP-Gal:betaGlcNAc beta 1/4-galactosyltransferase/ polypeptide 6 [Source:MGI Symbol;Acc:MGI:1928380]	NA	NA	0	NA	NA	NA	0	NA	NA	0	0	0	NA	2442.38	2344.27	2401.97	2347.46	2382.1	2426.24	2235.77	2275.58	0.824755	0.0117484	0.0292724	-0.0298786	0.00520101	-0.0279156	-0.0133025	0.013181	-0.10477	-0.0793051
BC028528	cDNA sequence BC028528 [Source:MGI Symbol;Acc:MGI:2385885]	NA	NA	0	NA	NA	NA	0	NA	NA	0	0	0	NA	42.7565	43.4204	43.1636	42.7742	45.3909	44.2334	43.1443	39.669	0.741031	0.035423	-0.0111576	0.011072	0.00251473	-0.0105598	0.0185131	-0.0187538	-0.0547192	-0.175878
BC055324	cDNA sequence BC055324 [Source:MGI Symbol;Acc:MGI:3590554]	NA	NA	0	NA	NA	NA	0	NA	NA	0	0	0	NA	175.613	232.121	135.939	142.928	177.201	222.584	131.296	138.967	0.821458	0.0123912	-0.215227	0.187247	-0.584668	-0.512334	-0.173836	0.155124	-0.606405	-0.524478
Batf3	basic leucine zipper transcription factor/ ATF-like 3 [Source:MGI Symbol;Acc:MGI:1925491]	NA	NA	0	NA	NA	NA	0	NA	NA	0	0	0	NA	1.39439	1.3903	1.37994	1.38184	1.40796	1.38293	1.37059	1.382	0.75639	0.0298612	0.00212105	-0.00212417	-0.0129141	-0.0109224	0.0128782	-0.0129942	-0.0259305	-0.0139722
Baz1b	bromodomain adjacent to zinc finger domain/ 1B [Source:MGI Symbol;Acc:MGI:1353499]	NA	NA	0	NA	NA	NA	0	NA	NA	0	0	1		6460.63	7002.34	5564.36	6413.61	5929.18	6808.7	5284.77	5288.44	0.820906	0.0125011	-0.0592509	0.0569132	-0.274709	-0.0697877	-0.103221	0.0963262	-0.269211	-0.268211
Bbip1	BBSome interacting protein 1 [Source:MGI Symbol;Acc:MGI:1913610]	NA	NA	0	NA	NA	NA	0	NA	NA	0	0	0	NA	606.516	609.129	573.498	529.83	676.407	666.568	572.12	568.338	0.955272	0.000216262	-0.00310504	0.00309837	-0.0838607	-0.198122	0.0105301	-0.0106075	-0.231043	-0.240612
Bcl2l12	BCL2-like 12 (proline rich) [Source:MGI Symbol;Acc:MGI:1922986]	NA	NA	0	melanoma_SCC	oncogene	Mis	1	CM	ambiguous	1	1	0	NA	191.84	204.582	162.146	173.348	195.383	203.704	183.131	165.53	0.755309	0.0302336	-0.047133	0.0456418	-0.289742	-0.193366	-0.0303968	0.0297696	-0.123826	-0.269609
Bcl7a	B cell CLL/lymphoma 7A [Source:MGI Symbol;Acc:MGI:1924295]	NA	NA	0	BNHL	fusion	T	1	DLBCL_MM	Act	1	1	0	NA	447.588	549.59	354.499	382.488	515.714	471.902	386.61	393.785	0.74648	0.0333829	-0.15568	0.140505	-0.492069	-0.382435	0.0626205	-0.0654624	-0.35307	-0.326542
Birc5	baculoviral IAP repeat-containing 5 [Source:MGI Symbol;Acc:MGI:1203517]	NA	NA	0	NA	NA	NA	0	NA	NA	0	0	0	NA	571.184	871.464	188.521	263.542	495.541	827.686	172.439	250.864	0.845106	0.00824476	-0.336692	0.272793	-1.93592	-1.45262	-0.416983	0.323094	-1.9399	-1.39908
Blm	Bloom syndrome/ RecQ like helicase [Source:MGI Symbol;Acc:MGI:1328362]	NA	NA	0		TSG	Mis_N_F	1	NA	NA	0	1	0	NA	369.018	474.083	192.165	247.306	343.856	398.197	231.749	229.215	0.745356	0.0337979	-0.192015	0.169435	-1.13336	-0.769409	-0.109718	0.101961	-0.678961	-0.69482
Blvra	biliverdin reductase A [Source:MGI Symbol;Acc:MGI:88170]	NA	NA	0	NA	NA	NA	0	NA	NA	0	0	0	NA	349.491	356.134	261.01	303.617	310.378	337.103	281.509	268.206	0.719128	0.0443808	-0.0136456	0.0135178	-0.434796	-0.216647	-0.0608108	0.0583509	-0.20166	-0.271496
Bmi1	Bmi1 polycomb ring finger oncogene [Source:MGI Symbol;Acc:MGI:88174]	NA	NA	0	NA	NA	NA	0	NA	NA	0	0	1	ATP-dependent ChRC	1838.15	1893.31	1685.82	1920.9	2092.29	2017.31	1745.78	1729.64	0.852973	0.00709525	-0.0214875	0.0211721	-0.146288	0.0420452	0.0260875	-0.0265679	-0.235124	-0.248523
Bmp8b	bone morphogenetic protein 8b [Source:MGI Symbol;Acc:MGI:107335]	NA	NA	0	NA	NA	NA	0	NA	NA	0	0	0	NA	36.0312	32.5931	28.2582	24.5851	29.2353	39.935	25.9673	27.7137	0.725148	0.041796	0.0705283	-0.0741542	-0.280047	-0.480932	-0.242442	0.207501	-0.41346	-0.319552
Bod1l	biorientation of chromosomes in cell division 1-like [Source:MGI Symbol;Acc:MGI:2444804]	NA	NA	0	NA	NA	NA	0	NA	NA	0	0	0	NA	5699.91	5707.69	5795.84	5681.21	5279.72	6106.71	5105.22	4738.81	0.711338	0.0478657	-0.000983764	0.000983093	0.0230939	-0.00572429	-0.108782	0.101151	-0.157269	-0.264718
Brca1	breast cancer 1/ early onset [Source:MGI Symbol;Acc:MGI:104537]	OV_PANCAN_BRCA	tsg	1	ovarian	TSG	D_Mis_N_F_S	1	BRCA_OV	LoF	1	1	0	NA	457.227	588.193	204.503	212.294	372.389	517.523	217.949	257.076	0.735182	0.0376955	-0.193101	0.170279	-1.35389	-1.29995	-0.256853	0.217961	-1.02967	-0.791467
Brca2	breast cancer 2/ early onset [Source:MGI Symbol;Acc:MGI:109337]	PANCAN	tsg	1	breast_ovarian_pancreatic	TSG	D_Mis_N_F_S	1	BLCA_BRCA_CM_COREAD_HNSC_MBL_OV_PAAD_PRAD_VV	LoF	1	1	0	NA	519.486	736.61	370.312	411.154	550.17	695.147	412.296	316.083	0.840212	0.00901608	-0.27379	0.230026	-0.762133	-0.611195	-0.178565	0.158878	-0.594762	-0.978138
Brip1	BRCA1 interacting protein C-terminal helicase 1 [Source:MGI Symbol;Acc:MGI:2442836]	NA	NA	0		TSG	F_N_Mis	1	NA	NA	0	1	0	NA	259.723	382.551	134.172	149.439	241.693	356.113	164.211	168.577	0.724352	0.0421327	-0.306213	0.252462	-1.25911	-1.10364	-0.306501	0.252657	-0.864121	-0.826268
Brip1os	BRCA1 interacting protein C-terminal helicase 1/ opposite strand [Source:MGI Symbol;Acc:MGI:1921288]	NA	NA	0	NA	NA	NA	0	NA	NA	0	0	0	NA	1836.43	1953.81	1385.23	1541.58	1574.05	1811.36	1418.99	1355.56	0.748266	0.0327306	-0.0453838	0.0439996	-0.452161	-0.297878	-0.104847	0.097741	-0.254467	-0.320438
Brsk1	BR serine/threonine kinase 1 [Source:MGI Symbol;Acc:MGI:2685946]	NA	NA	0	NA	NA	NA	0	NA	NA	0	0	0	NA	525.007	536.045	543.761	457.768	534.024	524.12	433.492	457.553	0.829307	0.010896	-0.0150874	0.0149313	0.0355483	-0.212808	0.0134411	-0.0135675	-0.287459	-0.209524
Btbd6	BTB (POZ) domain containing 6 [Source:MGI Symbol;Acc:MGI:3026623]	NA	NA	0	NA	NA	NA	0	NA	NA	0	0	0	NA	269.655	296.17	231.424	256.842	325.683	294.539	266.043	243.04	0.850016	0.00751441	-0.0692395	0.0660681	-0.289818	-0.139477	0.0706832	-0.0743255	-0.221126	-0.351589
Bub1	BUB1/ mitotic checkpoint serine/threonine kinase [Source:MGI Symbol;Acc:MGI:1100510]	NA	NA	0	NA	NA	NA	0	NA	NA	0	0	0	NA	624.295	916.003	179.97	276.86	582.763	813.308	198.557	278.237	0.819526	0.0127781	-0.302909	0.250214	-2.09738	-1.47598	-0.260392	0.220502	-1.81375	-1.32698
Bub1b	BUB1B/ mitotic checkpoint serine/threonine kinase [Source:MGI Symbol;Acc:MGI:1333889]	NA	NA	0		TSG	Mis_N_F_S	1	NA	NA	0	1	0	NA	672.742	1118.42	235.567	336.296	643.332	825.915	276.926	322.554	0.77194	0.0248135	-0.412769	0.320565	-1.92669	-1.41309	-0.191442	0.168989	-1.40751	-1.18747
Bves	blood vessel epicardial substance [Source:MGI Symbol;Acc:MGI:1346013]	NA	NA	0	NA	NA	NA	0	NA	NA	0	0	0	NA	80.7947	76.7922	66.2366	87.382	76.6631	82.4979	52.1822	53.0031	0.837404	0.00947859	0.0361848	-0.0371158	-0.250447	0.149261	-0.0538827	0.0519425	-0.608858	-0.586339
C330021F23Rik	NA	NA	NA	0	NA	NA	NA	0	NA	NA	0	0	0	NA	931.145	1028.89	842.748	910.31	978.772	1041.48	857.694	832.727	0.896541	0.0025581	-0.0738005	0.0702082	-0.217705	-0.106449	-0.0454935	0.0441027	-0.236003	-0.278623
C330027C09Rik	NA	NA	NA	0	NA	NA	NA	0	NA	NA	0	0	0	NA	1017.6	1252.2	424.956	472.3	964.603	1230.74	519.935	523.156	0.810872	0.0146044	-0.157392	0.141898	-1.41718	-1.2648	-0.186438	0.165079	-1.07804	-1.06913
C530008M17Rik	NA	NA	NA	0	NA	NA	NA	0	NA	NA	0	0	0	NA	1170.44	1485.27	623.979	657.052	1309.47	1401.62	590.323	693.202	0.894818	0.00268446	-0.182047	0.161628	-1.08953	-1.01502	-0.0498899	0.0482222	-1.19929	-0.967522
C920021L13Rik	RIKEN cDNA C920021L13 gene [Source:MGI Symbol;Acc:MGI:1923991]	NA	NA	0	NA	NA	NA	0	NA	NA	0	0	0	NA	13.0058	12.8617	13.0553	12.4921	14.5236	14.207	13.0968	12.5008	0.865258	0.00551442	0.00801672	-0.00806151	0.0134926	-0.0501288	0.0158078	-0.0159829	-0.13337	-0.200568
Cables2	CDK5 and Abl enzyme substrate 2 [Source:MGI Symbol;Acc:MGI:2182335]	NA	NA	0	NA	NA	NA	0	NA	NA	0	0	0	NA	669.399	648.74	625.733	658.551	696.769	727.56	646.635	671.532	0.823926	0.0119079	0.0224354	-0.0227898	-0.0748831	-0.00113547	-0.0315302	0.0308558	-0.139259	-0.0847551
Cactin	cactin/ spliceosome C complex subunit [Source:MGI Symbol;Acc:MGI:1917562]	NA	NA	0	NA	NA	NA	0	NA	NA	0	0	0	NA	1094.17	1116.31	1083.41	1091.73	1194.96	1184.99	1142.41	1112.13	0.907561	0.00184035	-0.0145227	0.014378	-0.0287776	-0.0177424	0.00603397	-0.00605931	-0.0588528	-0.0976036
Cacybp	calcyclin binding protein [Source:MGI Symbol;Acc:MGI:1270839]	NA	NA	0	NA	NA	NA	0	NA	NA	0	0	0	NA	3068.33	2940.02	2312.53	2783.46	2726.3	3633.74	2316.27	2664.84	0.736878	0.0370274	0.0304853	-0.0311434	-0.377498	-0.110091	-0.222094	0.192421	-0.457233	-0.254985
Cad	carbamoyl-phosphate synthetase 2/ aspartate transcarbamylase/ and dihydroorotase [Source:MGI Symbol;Acc:MGI:1916969]	NA	NA	0	NA	NA	NA	0	NA	NA	0	0	0	NA	3950.5	4617.14	3376	3078.6	3718.79	4114.57	3110.21	3241.88	0.732103	0.0389263	-0.116863	0.108102	-0.343583	-0.476622	-0.0747983	0.0711107	-0.332621	-0.2728
Calcrl	calcitonin receptor-like [Source:MGI Symbol;Acc:MGI:1926944]	NA	NA	0	NA	NA	NA	0	NA	NA	0	0	0	NA	570.097	544.649	418.244	422.247	635.153	676.825	525.136	542.158	0.780691	0.0222227	0.0325642	-0.0333163	-0.414297	-0.400557	-0.0465677	0.0451114	-0.320979	-0.274956
Caprin1	cell cycle associated protein 1 [Source:MGI Symbol;Acc:MGI:1858234]	NA	NA	0	NA	NA	NA	0	NA	NA	0	0	0	NA	22739.2	23858.8	19651.7	20987.7	22006	25643.5	19265.3	21727.3	0.75227	0.0312961	-0.0350845	0.0342515	-0.245612	-0.150723	-0.114566	0.106134	-0.306455	-0.132954
Carm1	coactivator-associated arginine methyltransferase 1 [Source:MGI Symbol;Acc:MGI:1913208]	NA	NA	0	NA	NA	NA	0	NA	NA	0	0	1	HM_w	2834.66	2994.74	2632.81	2486.03	3014.5	2769.39	2416.88	2443.93	0.90868	0.00177587	-0.0401714	0.0390831	-0.146747	-0.229503	0.0598765	-0.0624696	-0.258897	-0.242835
Casc5	NA	NA	NA	0	NA	NA	NA	0	NA	NA	0	0	0	NA	903.053	1244.94	236.375	363.256	789.122	1111.06	272.819	349.183	0.823656	0.0119603	-0.250107	0.213087	-2.18384	-1.56393	-0.26782	0.225801	-1.80013	-1.44409
Casp8	caspase 8 [Source:MGI Symbol;Acc:MGI:1261423]	CESC_STAD_PANCAN_BRCA_HNSC	tsg	1	hepatocellular_oralsquamouscell_breast	TSG	N_S_F	1	BLCA_BRCA_CESC_HNSC_SBCC_ST_VV	LoF	1	1	0	NA	1237.79	1325.96	1140.05	1094.82	1187.58	1357.43	1083.4	1164.53	0.728523	0.040388	-0.0504877	0.0487805	-0.169165	-0.227567	-0.0996437	0.0932039	-0.232106	-0.12793
Casp8ap2	caspase 8 associated protein 2 [Source:MGI Symbol;Acc:MGI:1349399]	NA	NA	0	NA	NA	NA	0	NA	NA	0	0	0	NA	1447.68	1611.61	1167.03	1286.11	1442.44	1591.03	1195.22	1172.12	0.87557	0.00437803	-0.0794566	0.0753081	-0.39036	-0.25018	-0.0724581	0.0689923	-0.343691	-0.371842
Cbx1	chromobox 1 [Source:MGI Symbol;Acc:MGI:105369]	NA	NA	0	NA	NA	NA	0	NA	NA	0	0	1	HM_r	1179.56	1134.59	970.387	1021.79	1121.8	1068.52	989.873	966.89	0.765717	0.0267645	0.027763	-0.0283078	-0.253853	-0.17938	0.0346755	-0.0355295	-0.145823	-0.179714
Cbx3	chromobox 3 [Source:MGI Symbol;Acc:MGI:108515]	NA	NA	0	NA	NA	NA	0	NA	NA	0	0	1	HM_r	2778.41	3184.36	2187.92	2884.06	2982.02	2982.58	2430.78	2341.82	0.763599	0.0274494	-0.101723	0.0950204	-0.44642	-0.047884	-0.000136782	0.000136769	-0.295006	-0.348797
Cbx5	chromobox 5 [Source:MGI Symbol;Acc:MGI:109372]	NA	NA	0	NA	NA	NA	0	NA	NA	0	0	1	HM_r	8949.72	11198.8	6124.24	7153.85	8350.85	10146.1	6191.17	7015.86	0.749739	0.0321981	-0.170761	0.152672	-0.718074	-0.493883	-0.147293	0.133638	-0.579004	-0.398596
Ccar1	cell division cycle and apoptosis regulator 1 [Source:MGI Symbol;Acc:MGI:1914750]	NA	NA	0	NA	NA	NA	0	NA	NA	0	0	0	NA	4459.18	4656.37	4255.79	4342.79	4863.69	4996.06	4456.42	4632.39	0.885925	0.0034009	-0.0315518	0.0308765	-0.0989016	-0.0697062	-0.0195007	0.0192407	-0.145665	-0.0897929
Ccdc101	NA	NA	NA	0	NA	NA	NA	0	NA	NA	0	0	0	NA	167.054	201.781	164.685	158.449	179.45	186.905	155.282	159.424	0.769224	0.0256538	-0.142665	0.129818	-0.163267	-0.21896	-0.0296578	0.0290604	-0.238348	-0.200369
Ccdc102a	coiled-coil domain containing 102A [Source:MGI Symbol;Acc:MGI:2686927]	NA	NA	0	NA	NA	NA	0	NA	NA	0	0	0	NA	1927.26	1872.66	1521.08	1733.45	1875.14	1782.47	1461.68	1555.76	0.874715	0.00446594	0.020582	-0.0208799	-0.320873	-0.132318	0.0360988	-0.0370253	-0.323277	-0.233281
Ccdc12	coiled-coil domain containing 12 [Source:MGI Symbol;Acc:MGI:1919904]	NA	NA	0	NA	NA	NA	0	NA	NA	0	0	0	NA	388.025	474.736	367.09	388.169	405.217	397.214	334.414	330.014	0.82367	0.0119576	-0.152811	0.138164	-0.232828	-0.152277	0.0143189	-0.0144625	-0.26274	-0.28185
Ccdc18	coiled-coil domain containing 18 [Source:MGI Symbol;Acc:MGI:1922974]	NA	NA	0	NA	NA	NA	0	NA	NA	0	0	0	NA	133.324	151.303	95.0899	103.907	138.622	143.559	94.194	77.1011	0.94046	0.000504398	-0.0941381	0.0883699	-0.581709	-0.453782	-0.0254612	0.0250197	-0.582915	-0.8718
Ccdc34	coiled-coil domain containing 34 [Source:MGI Symbol;Acc:MGI:1915451]	NA	NA	0	NA	NA	NA	0	NA	NA	0	0	0	NA	694.777	714.628	484.06	661.033	713.88	854.705	619.745	567.826	0.774218	0.0241219	-0.020464	0.0201778	-0.541829	-0.0922913	-0.135711	0.124035	-0.339717	-0.465942
Ccdc38	coiled-coil domain containing 38 [Source:MGI Symbol;Acc:MGI:2444738]	NA	NA	0	NA	NA	NA	0	NA	NA	0	0	0	NA	15.6259	16.1977	14.8166	14.928	15.5343	16.4292	14.3801	15.4956	0.728904	0.0402308	-0.0261598	0.0256939	-0.102881	-0.0920808	-0.040964	0.0398329	-0.152351	-0.0445648
Ccdc6	coiled-coil domain containing 6 [Source:MGI Symbol;Acc:MGI:1923801]	NA	NA	0	papillarythyroid_CML_NSCLC	TSG_fusion	T	1	COREAD	LoF	1	1	0	NA	6905	6615.78	5850.88	5547.22	6640.4	7676.66	5687.87	6562.82	0.735323	0.0376395	0.0305346	-0.0311949	-0.208453	-0.285342	-0.108393	0.100816	-0.331776	-0.125347
Ccdc69	coiled-coil domain containing 69 [Source:MGI Symbol;Acc:MGI:1196234]	NA	NA	0	NA	NA	NA	0	NA	NA	0	0	0	NA	7.69011	7.94932	7.66843	7.76741	8.82701	8.45304	7.89728	7.96015	0.867928	0.00520394	-0.024112	0.0237156	-0.0281856	-0.00968245	0.0308896	-0.0315655	-0.12968	-0.11824
Ccdc82	coiled-coil domain containing 82 [Source:MGI Symbol;Acc:MGI:1913646]	NA	NA	0	NA	NA	NA	0	NA	NA	0	0	0	NA	839.124	807.737	771.854	691.347	862.842	871.215	793.078	634.713	0.799896	0.0171452	0.0272369	-0.027761	-0.0933192	-0.252238	-0.00698308	0.00694944	-0.128616	-0.449975
Ccna2	cyclin A2 [Source:MGI Symbol;Acc:MGI:108069]	NA	NA	0	NA	NA	NA	0	NA	NA	0	0	0	NA	1211.92	1803.79	304.52	520.129	1038.26	1515.79	331.813	468.257	0.817194	0.0132552	-0.315199	0.258531	-2.30789	-1.53556	-0.298623	0.247286	-1.94434	-1.44741
Ccnb1	cyclin B1 [Source:MGI Symbol;Acc:MGI:88302]	NA	NA	0	NA	NA	NA	0	NA	NA	0	0	0	NA	807.977	1193.21	233.469	324.322	652.75	1030	250.108	368.384	0.776424	0.0234637	-0.308469	0.253992	-2.09955	-1.62535	-0.366218	0.291823	-1.75019	-1.19154
Ccnb2	cyclin B2 [Source:MGI Symbol;Acc:MGI:88311]	NA	NA	0	NA	NA	NA	0	NA	NA	0	0	0	NA	575.859	747.434	233.019	277.433	508.6	716.085	239.181	208.262	0.89296	0.00282514	-0.200344	0.175885	-1.50561	-1.25392	-0.267807	0.225792	-1.35624	-1.55594
Ccne2	cyclin E2 [Source:MGI Symbol;Acc:MGI:1329034]	NA	NA	0	NA	NA	NA	0	NA	NA	0	0	0	NA	325.271	484.625	207.743	181.199	292.193	449.613	178.141	250.231	0.709689	0.0486238	-0.316095	0.259133	-0.962936	-1.16016	-0.34412	0.277641	-1.05803	-0.567781
Cdc14b	CDC14 cell division cycle 14B [Source:MGI Symbol;Acc:MGI:2441808]	NA	NA	0	NA	NA	NA	0	NA	NA	0	0	0	NA	1046.95	1013.11	1074.92	863.641	1030.1	1111.59	907.266	869.093	0.779536	0.0225546	0.0235106	-0.0239001	0.0615411	-0.25418	-0.055966	0.0538757	-0.239155	-0.30117
Cdc20	cell division cycle 20 [Source:MGI Symbol;Acc:MGI:1859866]	NA	NA	0	NA	NA	NA	0	NA	NA	0	0	0	NA	931.286	1442.77	328.645	406.307	718.716	1258.18	339.6	546.459	0.707365	0.0497045	-0.350061	0.281489	-1.85275	-1.54671	-0.459747	0.348103	-1.54133	-0.855054
Cdc25c	cell division cycle 25C [Source:MGI Symbol;Acc:MGI:88350]	NA	NA	0	NA	NA	NA	0	NA	NA	0	0	0	NA	142.025	176.69	68.3451	77.9824	131.841	154.016	66.1523	76.7941	0.845312	0.00821328	-0.166123	0.148955	-1.22136	-1.03105	-0.116493	0.107786	-1.11143	-0.896223
Cdc27	cell division cycle 27 [Source:MGI Symbol;Acc:MGI:102685]	NA	NA	0	NA	NA	NA	0	NA	NA	0	0	0	NA	6384.31	6583.3	5654.21	5573.51	6471.12	7107.94	5692.52	6162.57	0.807637	0.0153268	-0.0223104	0.0219707	-0.197516	-0.218255	-0.0692963	0.0661198	-0.254245	-0.139779
Cdc45	cell division cycle 45 [Source:MGI Symbol;Acc:MGI:1338073]	NA	NA	0	NA	NA	NA	0	NA	NA	0	0	0	NA	229.977	334.807	133.857	145.936	202.646	266.418	125.968	161.872	0.707925	0.0494428	-0.296209	0.24563	-1.077	-0.952362	-0.210824	0.183908	-0.896731	-0.534928
Cdc6	cell division cycle 6 [Source:MGI Symbol;Acc:MGI:1345150]	NA	NA	0	NA	NA	NA	0	NA	NA	0	0	0	NA	197.701	261.377	94.9428	98.2313	171.826	220.517	112.04	113.753	0.710934	0.0480508	-0.215421	0.187394	-1.27361	-1.22449	-0.191168	0.168775	-0.808099	-0.786215
Cdc7	cell division cycle 7 (S. cerevisiae) [Source:MGI Symbol;Acc:MGI:1309511]	NA	NA	0	NA	NA	NA	0	NA	NA	0	0	0	NA	180.577	202.357	109.509	114.358	182.076	197.422	120.771	98.8214	0.889796	0.00307557	-0.0844825	0.0798077	-0.806048	-0.743533	-0.0595499	0.057189	-0.651811	-0.941196
Cdca2	cell division cycle associated 2 [Source:MGI Symbol;Acc:MGI:1919787]	NA	NA	0	NA	NA	NA	0	NA	NA	0	0	0	NA	489.804	648.973	174.789	230.343	407.548	614.978	171.125	242.443	0.81578	0.0135497	-0.21721	0.188746	-1.7038	-1.30563	-0.327094	0.266468	-1.57902	-1.07642
Cdca3	cell division cycle associated 3 [Source:MGI Symbol;Acc:MGI:1315198]	NA	NA	0	NA	NA	NA	0	NA	NA	0	0	0	NA	407.605	551.327	156.878	201.111	363.63	494.524	150.967	192.26	0.846016	0.00810605	-0.234257	0.20148	-1.61179	-1.25343	-0.238765	0.204804	-1.507	-1.15818
Cdca7l	cell division cycle associated 7 like [Source:MGI Symbol;Acc:MGI:2384982]	NA	NA	0	NA	NA	NA	0	NA	NA	0	0	0	NA	75.5084	100.942	52.9422	73.537	73.057	87.2879	51.9418	57.4704	0.773671	0.024287	-0.224555	0.194265	-0.736773	-0.262722	-0.134084	0.122675	-0.626212	-0.480288
Cdca8	cell division cycle associated 8 [Source:MGI Symbol;Acc:MGI:1196274]	NA	NA	0	NA	NA	NA	0	NA	NA	0	0	0	NA	453.411	678.405	184.195	235.146	384.328	555.062	160.742	253.17	0.782738	0.0216424	-0.319748	0.261579	-1.61934	-1.26701	-0.289386	0.240924	-1.54698	-0.891614
Cdh10	cadherin 10 [Source:MGI Symbol;Acc:MGI:107436]	NA	NA	0	melanoma	TSG	Mis_F_N	1	LUAD_LUSC_PAAD	Act	1	1	0	NA	410.361	442.678	396.06	182.517	441.947	439.73	272.797	229.685	0.758038	0.0292987	-0.0557192	0.0536471	-0.106894	-1.22458	0.00362324	-0.00363236	-0.692419	-0.940592
Cdk1	cyclin-dependent kinase 1 [Source:MGI Symbol;Acc:MGI:88351]	NA	NA	0	NA	NA	NA	0	NA	NA	0	0	0	NA	1258.64	1968.47	481.498	645.219	996.545	1649.47	471.066	709.953	0.741805	0.0351288	-0.358377	0.286832	-1.74464	-1.32239	-0.408816	0.318182	-1.48982	-0.898027
Cdk2	cyclin-dependent kinase 2 [Source:MGI Symbol;Acc:MGI:104772]	NA	NA	0	NA	NA	NA	0	NA	NA	0	0	0	NA	571.759	777.693	412.758	481.272	676.879	659.136	456.793	514.97	0.72704	0.041003	-0.238894	0.204899	-0.709006	-0.487448	0.0190333	-0.0192878	-0.548325	-0.375375
Cdk2ap1	CDK2 (cyclin-dependent kinase 2)-associated protein 1 [Source:MGI Symbol;Acc:MGI:1202069]	NA	NA	0	NA	NA	NA	0	NA	NA	0	0	0	NA	1066.59	1262.47	910.437	1000.19	1084.38	1074.52	805.245	963.788	0.759328	0.0288631	-0.126744	0.116503	-0.355112	-0.219461	0.00657253	-0.00660261	-0.422797	-0.163509
Cdk4	cyclin-dependent kinase 4 [Source:MGI Symbol;Acc:MGI:88357]	PANCAN_SKCM	oncogene	1		oncogene	Mis	1	CM	Act	1	1	0	NA	6113.97	6786.09	5232.11	6218.6	6290.07	6140.6	5536.15	5347.49	0.720905	0.0436081	-0.077196	0.0732743	-0.301913	-0.052716	0.0172429	-0.0174515	-0.166949	-0.216971
Cdkn2aipnl	CDKN2A interacting protein N-terminal like [Source:MGI Symbol;Acc:MGI:1261797]	NA	NA	0	NA	NA	NA	0	NA	NA	0	0	0	NA	457.344	555.357	388.943	484.356	505.766	541.147	413.827	425.803	0.769669	0.0255147	-0.146856	0.133279	-0.380577	-0.0640687	-0.049599	0.0479503	-0.339042	-0.297883
Cdkn2d	cyclin dependent kinase inhibitor 2D [Source:MGI Symbol;Acc:MGI:105387]	NA	NA	0	NA	NA	NA	0	NA	NA	0	0	0	NA	213.11	229.109	168.167	192.317	187.637	172.015	163.564	133.788	0.738012	0.0365852	-0.0531631	0.0512735	-0.394869	-0.201277	0.0613427	-0.0640673	-0.136741	-0.426653
Cdkn3	cyclin-dependent kinase inhibitor 3 [Source:MGI Symbol;Acc:MGI:1919641]	NA	NA	0	NA	NA	NA	0	NA	NA	0	0	0	NA	149.833	156.757	77.6106	95.3448	114.527	152.061	73.544	91.6036	0.786391	0.0206298	-0.0329574	0.0322213	-0.981982	-0.685082	-0.218924	0.190038	-0.857935	-0.541137
Cenpa	centromere protein A [Source:MGI Symbol;Acc:MGI:88375]	NA	NA	0	NA	NA	NA	0	NA	NA	0	0	0	NA	419.864	608.895	173.518	211.837	380.346	534.529	156.816	232.382	0.811692	0.0144246	-0.292911	0.24336	-1.56775	-1.27988	-0.266262	0.224693	-1.5445	-0.977077
Cenpe	centromere protein E [Source:MGI Symbol;Acc:MGI:1098230]	NA	NA	0	NA	NA	NA	0	NA	NA	0	0	0	NA	2248.9	3041.47	585.521	883.61	1882.23	2989.44	745.557	918.245	0.803368	0.0163138	-0.234148	0.2014	-2.17558	-1.58189	-0.371974	0.295459	-1.70803	-1.40746
Cenpf	centromere protein F [Source:MGI Symbol;Acc:MGI:1313302]	NA	NA	0	NA	NA	NA	0	NA	NA	0	0	0	NA	1855.98	2543.52	729.434	864.262	1592.12	2464.98	745.385	846.109	0.840226	0.00901379	-0.245161	0.209489	-1.59249	-1.3478	-0.349498	0.281126	-1.44439	-1.26153
Cenph	centromere protein H [Source:MGI Symbol;Acc:MGI:1349448]	NA	NA	0	NA	NA	NA	0	NA	NA	0	0	0	NA	184.842	229.443	90.0656	120.463	156.233	235.306	96.6586	109.243	0.812144	0.0143263	-0.164333	0.147514	-1.20157	-0.782039	-0.325456	0.265381	-1.01818	-0.841612
Cenpi	centromere protein I [Source:MGI Symbol;Acc:MGI:2147897]	NA	NA	0	NA	NA	NA	0	NA	NA	0	0	0	NA	346.747	431.788	141.894	161.678	276.927	382.941	160.627	194.972	0.719762	0.0441043	-0.16688	0.149562	-1.45595	-1.26764	-0.252672	0.214945	-1.03846	-0.758911
Cenpj	centromere protein J [Source:MGI Symbol;Acc:MGI:2684927]	NA	NA	0	NA	NA	NA	0	NA	NA	0	0	0	NA	406.863	423.54	339.665	389.627	376.164	424.315	326.117	267.212	0.874636	0.00447412	-0.0292671	0.0286852	-0.289699	-0.0917165	-0.0895026	0.0842729	-0.295476	-0.582879
Cenpk	centromere protein K [Source:MGI Symbol;Acc:MGI:1926210]	NA	NA	0	NA	NA	NA	0	NA	NA	0	0	0	NA	123.614	166.649	86.9326	112.339	126.181	149.639	85.2795	94.6358	0.818843	0.0129168	-0.231517	0.19945	-0.739391	-0.369498	-0.128235	0.117761	-0.693455	-0.543268
Cenpn	centromere protein N [Source:MGI Symbol;Acc:MGI:1919405]	NA	NA	0	NA	NA	NA	0	NA	NA	0	0	0	NA	187.168	263.173	123.184	142.572	193.821	249.745	114.56	119.885	0.887519	0.00326439	-0.266685	0.224994	-0.870204	-0.659324	-0.194423	0.171306	-0.953043	-0.887494
Cenpp	centromere protein P [Source:MGI Symbol;Acc:MGI:1913586]	NA	NA	0	NA	NA	NA	0	NA	NA	0	0	0	NA	87.9382	120.272	75.5698	70.8848	96.0636	118.585	79.578	77.9453	0.740334	0.0356893	-0.243482	0.208262	-0.462162	-0.554496	-0.159918	0.143947	-0.431537	-0.461445
Cenpq	centromere protein Q [Source:MGI Symbol;Acc:MGI:1933744]	NA	NA	0	NA	NA	NA	0	NA	NA	0	0	0	NA	221.4	251.791	146.268	185.999	209.221	250.034	156.437	161.025	0.83082	0.0106216	-0.0957651	0.089802	-0.69381	-0.347126	-0.134266	0.122827	-0.553716	-0.512016
Cenpw	centromere protein W [Source:MGI Symbol;Acc:MGI:1913561]	NA	NA	0	NA	NA	NA	0	NA	NA	0	0	0	NA	100.479	118.054	76.8899	73.8744	92.4593	112.101	69.8692	76.2656	0.815362	0.0136376	-0.120962	0.1116	-0.506984	-0.564704	-0.145637	0.132274	-0.5498	-0.423423
Cep112	centrosomal protein 112 [Source:MGI Symbol;Acc:MGI:1923673]	NA	NA	0	NA	NA	NA	0	NA	NA	0	0	0	NA	255.74	236.462	208.725	230.799	286.64	238.006	180.129	158.383	0.909377	0.00173642	0.0554278	-0.0576427	-0.23765	-0.0926127	0.127895	-0.140345	-0.542318	-0.727931
Cep128	centrosomal protein 128 [Source:MGI Symbol;Acc:MGI:1922466]	NA	NA	0	NA	NA	NA	0	NA	NA	0	0	0	NA	294.709	336.151	183.532	202.787	269.925	325.154	214.772	175.063	0.810058	0.014784	-0.0980287	0.0917895	-0.78129	-0.637355	-0.140523	0.128042	-0.470272	-0.765207
Cep135	centrosomal protein 135 [Source:MGI Symbol;Acc:MGI:2681869]	NA	NA	0	NA	NA	NA	0	NA	NA	0	0	0	NA	562.238	548.216	488.499	405.302	527.995	576.881	474.066	398.237	0.799343	0.0172801	0.0181034	-0.0183334	-0.184722	-0.454081	-0.0652877	0.0624607	-0.220726	-0.472185
Cep170	centrosomal protein 170 [Source:MGI Symbol;Acc:MGI:1918348]	NA	NA	0	NA	NA	NA	0	NA	NA	0	0	0	NA	8019.06	7762.7	7392.87	7319.67	8290.66	8523.25	7452.79	7498.73	0.971448	5.69508e-05	0.0232472	-0.0236279	-0.0940524	-0.108408	-0.0200968	0.0198207	-0.173803	-0.164937
Cep192	centrosomal protein 192 [Source:MGI Symbol;Acc:MGI:1918049]	NA	NA	0	NA	NA	NA	0	NA	NA	0	0	0	NA	1954.78	1994.64	1531.88	1402.63	1902.16	1941.09	1650.16	1339.27	0.791082	0.0193738	-0.0146345	0.0144876	-0.366337	-0.493512	-0.0146902	0.0145421	-0.219723	-0.52088
Cep295	centrosomal protein 295 [Source:MGI Symbol;Acc:MGI:2442521]	NA	NA	0	NA	NA	NA	0	NA	NA	0	0	0	NA	1318.92	1344.07	1104.9	956.016	1436.02	1368.49	1155.36	886.703	0.853879	0.00696988	-0.0136947	0.013566	-0.269126	-0.47794	0.0343267	-0.0351634	-0.279409	-0.661223
Cep55	centrosomal protein 55 [Source:MGI Symbol;Acc:MGI:1921357]	NA	NA	0	NA	NA	NA	0	NA	NA	0	0	0	NA	330.044	489.31	120.98	159.994	276.665	496.659	142.685	197.217	0.742782	0.0347593	-0.311829	0.256262	-1.75972	-1.35647	-0.482932	0.361182	-1.43824	-0.971292
Cep83	centrosomal protein 83 [Source:MGI Symbol;Acc:MGI:1924298]	NA	NA	0	NA	NA	NA	0	NA	NA	0	0	0	NA	887.228	1025.71	825.812	814.991	1079.94	1178.84	866.213	988.444	0.827139	0.0112969	-0.108417	0.100836	-0.211909	-0.230937	-0.0645914	0.061823	-0.382754	-0.192317
Cept1	choline/ethanolaminephosphotransferase 1 [Source:MGI Symbol;Acc:MGI:2139793]	NA	NA	0	NA	NA	NA	0	NA	NA	0	0	0	NA	1249.57	1252.68	1166.82	1225.63	1337.4	1262.01	1161.66	1104.2	0.910847	0.00165518	-0.0017912	0.00178898	-0.100638	-0.0296986	0.0412452	-0.0424591	-0.16199	-0.235182
Cetn3	centrin 3 [Source:MGI Symbol;Acc:MGI:1097706]	NA	NA	0	NA	NA	NA	0	NA	NA	0	0	0	NA	1338.52	1413.02	1273.08	1400.54	1479.36	1625.65	1269.32	1307.41	0.844271	0.0083732	-0.0395996	0.0385416	-0.111911	0.0257412	-0.069629	0.0664227	-0.290543	-0.24789
Chaf1a	chromatin assembly factor 1/ subunit A (p150) [Source:MGI Symbol;Acc:MGI:1351331]	NA	NA	0	NA	NA	NA	0	NA	NA	0	0	1	ATP-dependent ChRC	835.112	1108.11	457.605	599.213	683.672	1057.75	461.026	567.565	0.746129	0.0335123	-0.21841	0.189651	-1.08628	-0.697311	-0.348887	0.280731	-0.917343	-0.617405
Chchd1	coiled-coil-helix-coiled-coil-helix domain containing 1 [Source:MGI Symbol;Acc:MGI:1913371]	NA	NA	0	NA	NA	NA	0	NA	NA	0	0	0	NA	614.015	676.421	528.594	572.556	603.675	708.05	554.475	562.727	0.762008	0.0279709	-0.071513	0.0681349	-0.287627	-0.172371	-0.119621	0.110457	-0.242271	-0.220958
Chd1l	chromodomain helicase DNA binding protein 1-like [Source:MGI Symbol;Acc:MGI:1915308]	NA	NA	0	NA	NA	NA	0	NA	NA	0	0	1	Helicase	218.74	223.733	179.02	187.899	196.326	206.53	181.748	161.156	0.79637	0.0180163	-0.0163736	0.0161898	-0.305467	-0.235628	-0.0370113	0.0360855	-0.148326	-0.321806
Chd4	chromodomain helicase DNA binding protein 4 [Source:MGI Symbol;Acc:MGI:1344380]	BRCA_UCS_UCEC_PANCAN	oncogene_tsg	1	uterineserouscarcinoma	oncogene	Mis_F_N	1	ALL_BLCA_RCH_UCEC_UCS	Act	1	1	1	Helicase	15193.1	16422.5	13596.5	15348.1	14616.8	15993.3	12927.7	13869.4	0.77044	0.0252753	-0.0572226	0.0550392	-0.217402	-0.0425821	-0.0663824	0.0634618	-0.243546	-0.1421
Chkb	choline kinase beta [Source:MGI Symbol;Acc:MGI:1328313]	NA	NA	0	NA	NA	NA	0	NA	NA	0	0	0	NA	16.8298	15.6248	16.3735	15.7787	17.3348	15.9283	15.4538	14.8691	0.710497	0.0482515	0.0525953	-0.0545855	0.0129427	-0.0404472	0.0597464	-0.062328	-0.10596	-0.161606
Chordc1	cysteine and histidine-rich domain (CHORD)-containing/ zinc-binding protein 1 [Source:MGI Symbol;Acc:MGI:1914167]	NA	NA	0	NA	NA	NA	0	NA	NA	0	0	0	NA	2576.85	2461.07	2384.85	2295.27	2364.65	2868.64	2199.42	2365.39	0.722515	0.042915	0.032782	-0.0335442	-0.0789305	-0.134165	-0.146092	0.132649	-0.250595	-0.145637
Chrac1	chromatin accessibility complex 1 [Source:MGI Symbol;Acc:MGI:2135796]	NA	NA	0	NA	NA	NA	0	NA	NA	0	0	1	ATP-dependent ChRC	306.538	389.63	291.023	320.238	367.343	355.03	266.987	303.585	0.80258	0.0165002	-0.183368	0.162668	-0.258301	-0.12029	0.024384	-0.0248032	-0.435973	-0.250647
Chrng	cholinergic receptor/ nicotinic/ gamma polypeptide [Source:MGI Symbol;Acc:MGI:87895]	NA	NA	0	NA	NA	NA	0	NA	NA	0	0	0	NA	1.34248	1.34509	1.32865	1.31964	1.35558	1.33152	1.31966	1.33062	0.712411	0.0473761	-0.00140095	0.0013996	-0.0163404	-0.0261581	0.0128615	-0.0129772	-0.0258855	-0.0139489
Chst2	carbohydrate sulfotransferase 2 [Source:MGI Symbol;Acc:MGI:1891160]	NA	NA	0	NA	NA	NA	0	NA	NA	0	0	0	NA	2198.62	2700.67	2131.36	2184.08	3012.34	3408.82	2196.82	2419.59	0.892157	0.00288741	-0.155976	0.140746	-0.2008	-0.165548	-0.0919479	0.0864372	-0.547415	-0.408073
Cit	citron [Source:MGI Symbol;Acc:MGI:105313]	NA	NA	0	NA	NA	NA	0	NA	NA	0	0	0	NA	578.297	668.067	185.172	232.127	456.52	681.955	203.716	248.255	0.819792	0.0127245	-0.107844	0.10034	-1.75079	-1.42474	-0.318353	0.260646	-1.48247	-1.19721
Ckap2	cytoskeleton associated protein 2 [Source:MGI Symbol;Acc:MGI:1931797]	NA	NA	0	NA	NA	NA	0	NA	NA	0	0	0	NA	1679.02	1954.23	991.689	1303.94	1336.92	2014.7	1039.54	837.258	0.846612	0.00801613	-0.113639	0.105338	-0.8733	-0.478385	-0.325945	0.265706	-0.688911	-1.00111
Ckap2l	cytoskeleton associated protein 2-like [Source:MGI Symbol;Acc:MGI:1917716]	NA	NA	0	NA	NA	NA	0	NA	NA	0	0	0	NA	1081.03	1346.34	289.522	434.52	724.867	1171.79	314.629	412.947	0.778407	0.0228819	-0.166986	0.149648	-2.06765	-1.48191	-0.387671	0.305255	-1.59174	-1.19943
Ckap5	cytoskeleton associated protein 5 [Source:MGI Symbol;Acc:MGI:1923036]	NA	NA	0	NA	NA	NA	0	NA	NA	0	0	0	NA	5944.61	6487.49	4989.07	5405.51	5531.92	6254.91	4803.8	5176.53	0.774868	0.0239268	-0.0644167	0.061663	-0.317226	-0.201568	-0.0913235	0.0858852	-0.294928	-0.187119
Cks1b	CDC28 protein kinase 1b [Source:MGI Symbol;Acc:MGI:1889208]	NA	NA	0	NA	NA	NA	0	NA	NA	0	0	0	NA	1141.37	1519.08	826.785	876.125	1113.34	1381.7	821.932	939.127	0.735405	0.037607	-0.220901	0.191526	-0.686085	-0.60246	-0.164165	0.147378	-0.601971	-0.409671
Cks2	CDC28 protein kinase regulatory subunit 2 [Source:MGI Symbol;Acc:MGI:1913447]	NA	NA	0	NA	NA	NA	0	NA	NA	0	0	0	NA	477.449	679.808	307.98	313.775	445.442	672.634	302.608	375.276	0.734907	0.0378042	-0.27729	0.232489	-0.909802	-0.882906	-0.327708	0.266875	-0.885499	-0.574993
Clasp1	CLIP associating protein 1 [Source:MGI Symbol;Acc:MGI:1923957]	NA	NA	0	NA	NA	NA	0	NA	NA	0	0	0	NA	5872.33	5703.74	5613.98	5260.71	5476.87	5951.69	5338.31	5294.7	0.729876	0.039832	0.0208599	-0.0211659	-0.0440498	-0.137817	-0.0612198	0.0587274	-0.0981889	-0.110024
Clcc1	chloride channel CLIC-like 1 [Source:MGI Symbol;Acc:MGI:2385186]	NA	NA	0	NA	NA	NA	0	NA	NA	0	0	0	NA	569.016	587.551	514.479	531.542	552.716	561.805	527.375	478.627	0.80645	0.0155973	-0.0233079	0.0229373	-0.168663	-0.121593	-0.0118137	0.0117177	-0.079524	-0.219451
Cldn34c1	claudin 34C1 [Source:MGI Symbol;Acc:MGI:1920311]	NA	NA	0	NA	NA	NA	0	NA	NA	0	0	0	NA	28.3855	29.6261	29.4132	26.936	31.5753	32.3663	27.754	28.3276	0.865497	0.00548609	-0.0311886	0.0305286	0.0201229	-0.106808	-0.0179581	0.0177373	-0.20406	-0.174548
Clns1a	chloride channel/ nucleotide-sensitive/ 1A [Source:MGI Symbol;Acc:MGI:109638]	NA	NA	0	NA	NA	NA	0	NA	NA	0	0	0	NA	1593.52	1759.82	1565.56	1542.81	1562.1	1629.19	1469.98	1476.36	0.751395	0.0316062	-0.0733793	0.069827	-0.0989239	-0.120043	-0.0306556	0.0300177	-0.118344	-0.112092
Clspn	claspin [Source:MGI Symbol;Acc:MGI:2445153]	NA	NA	0	NA	NA	NA	0	NA	NA	0	0	0	NA	578.038	764.488	165.133	219.228	428.327	694.65	170.107	204.472	0.827617	0.0112076	-0.215713	0.187615	-2.02325	-1.61445	-0.390545	0.30703	-1.72282	-1.45735
Cmc2	COX assembly mitochondrial protein 2 [Source:MGI Symbol;Acc:MGI:1913781]	NA	NA	0	NA	NA	NA	0	NA	NA	0	0	0	NA	185.855	185.645	159.637	173.698	167.758	207.918	144.428	157.318	0.825144	0.011674	0.00081453	-0.000814991	-0.218567	-0.0967816	-0.163108	0.146526	-0.379139	-0.255804
Cmtm7	CKLF-like MARVEL transmembrane domain containing 7 [Source:MGI Symbol;Acc:MGI:2447166]	NA	NA	0	NA	NA	NA	0	NA	NA	0	0	0	NA	971.532	1144.17	1011.41	895.538	963.456	1097.8	807.883	887.238	0.779627	0.0225283	-0.122801	0.113163	-0.0647595	-0.240307	-0.0972321	0.0910907	-0.351304	-0.216129
Cnn1	calponin 1 [Source:MGI Symbol;Acc:MGI:104979]	NA	NA	0	NA	NA	NA	0	NA	NA	0	0	0	NA	8794.23	10113.3	5364.08	3438.8	7802.9	12394.9	3647.63	6264.45	0.772915	0.024516	-0.104335	0.0972958	-0.817562	-1.45899	-0.372118	0.29555	-1.46917	-0.68894
Cnot1	CCR4-NOT transcription complex/ subunit 1 [Source:MGI Symbol;Acc:MGI:2442402]	NA	NA	0	NA	NA	NA	0	NA	NA	0	0	0	NA	8455.27	8806.18	7905.88	8174.87	8580.92	8711.06	8259.03	7754.66	0.80914	0.0149884	-0.0296312	0.0290348	-0.126557	-0.0782869	-0.0108988	0.010817	-0.0660585	-0.156967
Cnot2	CCR4-NOT transcription complex/ subunit 2 [Source:MGI Symbol;Acc:MGI:1919318]	NA	NA	0	NA	NA	NA	0	NA	NA	0	0	0	NA	1949.77	1864.19	1798.49	1759.64	2055.64	1854.56	1852.44	1555.96	0.744039	0.0342877	0.0320154	-0.0327421	-0.084504	-0.116009	0.0723462	-0.0761666	-0.0778122	-0.32944
Cnpy4	canopy FGF signaling regulator 4 [Source:MGI Symbol;Acc:MGI:1913705]	NA	NA	0	NA	NA	NA	0	NA	NA	0	0	0	NA	1118.52	1157.33	980.317	1089.42	1145.12	1279.7	971.81	1044.65	0.870939	0.0048676	-0.0248132	0.0243936	-0.21509	-0.0628533	-0.0823835	0.0779322	-0.31913	-0.214856
Cnst	consortin/ connexin sorting protein [Source:MGI Symbol;Acc:MGI:2445141]	NA	NA	0	NA	NA	NA	0	NA	NA	0	0	0	NA	1417.91	1217.66	1319.07	1016.26	1386.47	1624.16	1173.9	1186.63	0.761015	0.0282994	0.105654	-0.114007	0.00140014	-0.374849	-0.118646	0.109626	-0.358756	-0.343197
Cntln	centlein/ centrosomal protein [Source:MGI Symbol;Acc:MGI:2443104]	NA	NA	0	NA	NA	NA	0	NA	NA	0	0	0	NA	863.133	941.794	752.142	1059.24	1050.53	928.308	759.811	607.312	0.730147	0.039721	-0.0642857	0.061543	-0.262863	0.231085	0.0864666	-0.0919811	-0.380945	-0.704148
Col6a4	collagen/ type VI/ alpha 4 [Source:MGI Symbol;Acc:MGI:1915803]	NA	NA	0	NA	NA	NA	0	NA	NA	0	0	0	NA	10.731	10.1108	10.2086	9.77416	10.6856	9.98429	9.78029	9.4682	0.748262	0.0327318	0.0423089	-0.0435872	-0.0296935	-0.0924327	0.0481392	-0.049801	-0.0795833	-0.126371
Commd1	COMM domain containing 1 [Source:MGI Symbol;Acc:MGI:109474]	NA	NA	0	NA	NA	NA	0	NA	NA	0	0	0	NA	866.798	890.078	784.713	887.306	862.56	828.824	759.732	738.993	0.824534	0.0117908	-0.0192442	0.0189909	-0.162775	0.0144923	0.0284926	-0.0290667	-0.154641	-0.194571
Coq2	coenzyme Q2 4-hydroxybenzoate polyprenyltransferase [Source:MGI Symbol;Acc:MGI:1919133]	NA	NA	0	NA	NA	NA	0	NA	NA	0	0	0	NA	636.054	680.315	608.124	558.453	604.519	673.964	552.86	555.742	0.817857	0.0131185	-0.0493428	0.0477109	-0.114128	-0.237057	-0.0805734	0.0763105	-0.209446	-0.201944
Coq3	coenzyme Q3 methyltransferase [Source:MGI Symbol;Acc:MGI:101813]	NA	NA	0	NA	NA	NA	0	NA	NA	0	0	0	NA	437.442	491.822	472.071	409.665	473.224	493.379	438.44	404.479	0.732794	0.038648	-0.0869979	0.0820487	0.0229147	-0.181642	-0.0304013	0.0297738	-0.140544	-0.256858
Cox10	heme A:farnesyltransferase cytochrome c oxidase assembly factor 10 [Source:MGI Symbol;Acc:MGI:1917633]	NA	NA	0	NA	NA	NA	0	NA	NA	0	0	0	NA	513.824	501.803	479.269	467.159	470.086	501.808	431.495	444.676	0.899732	0.00233444	0.0169766	-0.0171788	-0.0834645	-0.120384	-0.0478731	0.0463354	-0.171456	-0.128044
Cox6a2	cytochrome c oxidase subunit 6A2 [Source:MGI Symbol;Acc:MGI:104649]	NA	NA	0	NA	NA	NA	0	NA	NA	0	0	0	NA	12.0712	11.7117	11.6943	12.0644	11.9632	11.4606	10.861	11.1311	0.750273	0.0320066	0.0216432	-0.0219728	-0.0241178	0.0208342	0.0306301	-0.0312946	-0.108813	-0.073372
Cpsf4	cleavage and polyadenylation specific factor 4 [Source:MGI Symbol;Acc:MGI:1861602]	NA	NA	0	NA	NA	NA	0	NA	NA	0	0	0	NA	425.48	467.175	361.72	352.054	440.763	464.939	366.243	379.715	0.825964	0.0115179	-0.0690112	0.0658602	-0.303228	-0.342303	-0.0390321	0.0380038	-0.306234	-0.254118
Crip1	cysteine-rich protein 1 (intestinal) [Source:MGI Symbol;Acc:MGI:88501]	NA	NA	0	NA	NA	NA	0	NA	NA	0	0	0	NA	204.781	237.324	155.859	201.176	224.215	263.359	113.191	155.126	0.897235	0.00250838	-0.110305	0.102467	-0.504151	-0.135935	-0.12074	0.111411	-1.10686	-0.652182
Crispld2	cysteine-rich secretory protein LCCL domain containing 2 [Source:MGI Symbol;Acc:MGI:1926142]	NA	NA	0	NA	NA	NA	0	NA	NA	0	0	0	NA	814.261	1562.71	632.067	772.014	1485.27	1215.59	768.205	677.003	0.795237	0.0183021	-0.545558	0.394924	-0.910972	-0.622423	0.137305	-0.151761	-0.813858	-0.996187
Crlf3	cytokine receptor-like factor 3 [Source:MGI Symbol;Acc:MGI:1860086]	NA	NA	0	NA	NA	NA	0	NA	NA	0	0	0	NA	832.961	811.322	596.347	541.138	723.824	933.351	570.627	670.329	0.741355	0.0352998	0.0188622	-0.0191121	-0.463236	-0.603389	-0.195015	0.171766	-0.538107	-0.305783
Csrp2bp	NA	NA	NA	0	NA	NA	NA	0	NA	NA	0	0	0	NA	1096.89	1184.82	1035.95	1089.77	1190.93	1167.29	1102.01	1034.06	0.819189	0.0128463	-0.0567026	0.054558	-0.139155	-0.0660956	0.0143912	-0.0145362	-0.0975631	-0.189381
Cstf2	cleavage stimulation factor/ 3' pre-RNA subunit 2 [Source:MGI Symbol;Acc:MGI:1343054]	NA	NA	0	NA	NA	NA	0	NA	NA	0	0	0	NA	1004.46	1189.31	840.758	925.487	1063.92	1188.04	861.282	949.217	0.78968	0.0197439	-0.126998	0.116717	-0.383648	-0.245127	-0.0817916	0.0774023	-0.386621	-0.246368
Ctbs	chitobiase [Source:MGI Symbol;Acc:MGI:1921495]	NA	NA	0	NA	NA	NA	0	NA	NA	0	0	0	NA	380.443	373.586	375.088	396.223	388.018	364.204	292.545	300.386	0.806945	0.0154841	0.0130606	-0.0131799	-0.00739024	0.0716929	0.0449661	-0.0464128	-0.3625	-0.324341
Ctdspl	CTD (carboxy-terminal domain/ RNA polymerase II/ polypeptide A) small phosphatase-like [Source:MGI Symbol;Acc:MGI:1916524]	NA	NA	0	NA	NA	NA	0	NA	NA	0	0	0	NA	903.855	1087.14	832.522	971.276	1105.05	1066.1	864.675	976.563	0.712657	0.0472643	-0.139325	0.127047	-0.257928	-0.035535	0.0256554	-0.02612	-0.328229	-0.152673
Ctdspl2	CTD (carboxy-terminal domain/ RNA polymerase II/ polypeptide A) small phosphatase like 2 [Source:MGI Symbol;Acc:MGI:1196405]	NA	NA	0	NA	NA	NA	0	NA	NA	0	0	0	NA	1493.57	1736.23	1332.6	1492.11	1608.49	1624.76	1340.57	1387.58	0.814645	0.0137891	-0.11268	0.104513	-0.277199	-0.114087	-0.00727798	0.00724145	-0.270138	-0.220418
Ctf2	cardiotrophin 2 [Source:MGI Symbol;Acc:MGI:2684607]	NA	NA	0	NA	NA	NA	0	NA	NA	0	0	0	NA	2.62712	2.62842	2.6149	2.60093	2.71879	2.67121	2.62252	2.60125	0.896619	0.00255251	-0.000357028	0.00035694	-0.00708008	-0.0148121	0.0126783	-0.0127907	-0.0393282	-0.051081
Cthrc1	collagen triple helix repeat containing 1 [Source:MGI Symbol;Acc:MGI:1915838]	NA	NA	0	NA	NA	NA	0	NA	NA	0	0	0	NA	3721	2962.24	2664.49	3608.38	2611.9	2118.27	1664.31	1453.81	0.782994	0.0215702	0.155144	-0.17386	-0.326685	0.110805	0.143209	-0.159007	-0.506966	-0.702048
Ctla2b	cytotoxic T lymphocyte-associated protein 2 beta [Source:MGI Symbol;Acc:MGI:88555]	NA	NA	0	NA	NA	NA	0	NA	NA	0	0	0	NA	88.1452	102.259	83.6751	89.8131	92.039	78.0158	70.1549	63.993	0.831705	0.0104631	-0.111112	0.103163	-0.186195	-0.0840676	0.114317	-0.124161	-0.277383	-0.410015
Cul4b	cullin 4B [Source:MGI Symbol;Acc:MGI:1919834]	NA	NA	0	NA	NA	NA	0	NA	NA	0	0	0	NA	3712.21	3825.01	3493.66	3569.48	3701.53	3890.38	3362.33	3430.91	0.941276	0.000484241	-0.0217548	0.0214316	-0.109294	-0.0783202	-0.0363423	0.0354493	-0.175003	-0.145873
Cyfip1	cytoplasmic FMR1 interacting protein 1 [Source:MGI Symbol;Acc:MGI:1338801]	NA	NA	0	NA	NA	NA	0	NA	NA	0	0	0	NA	8073.44	8281.26	7075.33	7592.46	8180.58	9260.56	7229.74	8260.26	0.70679	0.0499739	-0.01845	0.018217	-0.208836	-0.107065	-0.0922192	0.0866769	-0.270479	-0.0782367
Cyp51	cytochrome P450/ family 51 [Source:MGI Symbol;Acc:MGI:106040]	NA	NA	0	NA	NA	NA	0	NA	NA	0	0	0	NA	4892.45	5103.3	4391	4319.58	5503.75	6497.16	4605.99	4953.58	0.89467	0.00269551	-0.0307574	0.0301153	-0.186764	-0.210424	-0.124657	0.114737	-0.38156	-0.2766
D17H6S56E-5	NA	NA	NA	0	NA	NA	NA	0	NA	NA	0	0	0	NA	814.998	1070.02	241.232	354.225	703.895	961.239	273.917	299.689	0.846715	0.00800069	-0.209706	0.183057	-1.96608	-1.41184	-0.242205	0.207328	-1.60383	-1.4741
D430020J02Rik	RIKEN cDNA D430020J02 gene [Source:MGI Symbol;Acc:MGI:2442237]	NA	NA	0	NA	NA	NA	0	NA	NA	0	0	0	NA	138.609	154.133	100.148	115.341	154.602	135.491	110.781	113.634	0.783532	0.0214195	-0.0786067	0.0745442	-0.547495	-0.34372	0.0920428	-0.0983177	-0.38881	-0.352128
D4Ertd617e	NA	NA	NA	0	NA	NA	NA	0	NA	NA	0	0	0	NA	2.34956	2.35146	2.33922	2.34548	2.37031	2.38954	2.30769	2.36495	0.722499	0.0429221	-0.00058345	0.000583215	-0.00694654	-0.00309064	-0.0058401	0.00581655	-0.0444675	-0.00910836
D830031N03Rik	NA	NA	NA	0	NA	NA	NA	0	NA	NA	0	0	0	NA	5497.04	5663.51	5118.71	4662.79	5054.6	5199.45	4651.46	3998.73	0.834087	0.0100442	-0.0216811	0.0213601	-0.124554	-0.259141	-0.0205248	0.0202369	-0.140437	-0.358581
Dapk3	death-associated protein kinase 3 [Source:MGI Symbol;Acc:MGI:1203520]	NA	NA	0	NA	NA	NA	0	NA	NA	0	0	0	NA	859.296	906.037	872.019	864.579	1101.56	1044.8	969.898	1007.02	0.806186	0.0156578	-0.0387134	0.0377017	-0.0175096	-0.0298706	0.0376591	-0.0386685	-0.145986	-0.0917952
Dapp1	dual adaptor for phosphotyrosine and 3-phosphoinositides 1 [Source:MGI Symbol;Acc:MGI:1347063]	NA	NA	0	NA	NA	NA	0	NA	NA	0	0	0	NA	271.186	269.632	235.703	286.579	243.063	252.189	208.321	170.087	0.790725	0.0194675	0.00413706	-0.00414896	-0.198172	0.0837879	-0.0268338	0.0263438	-0.249358	-0.541895
Dbf4	DBF4 zinc finger [Source:MGI Symbol;Acc:MGI:1351328]	NA	NA	0	NA	NA	NA	0	NA	NA	0	0	0	NA	1081.31	1321.21	577.366	537.396	963.75	1242.74	531.465	672.68	0.791719	0.019207	-0.151773	0.137315	-1.05699	-1.16049	-0.195024	0.171772	-1.05371	-0.713763
Dcbld1	discoidin/ CUB and LCCL domain containing 1 [Source:MGI Symbol;Acc:MGI:1913936]	NA	NA	0	NA	NA	NA	0	NA	NA	0	0	0	NA	296.858	301.701	259.504	251.058	278.657	328.355	226.562	244.046	0.913577	0.00151091	-0.0117212	0.0116267	-0.205737	-0.253474	-0.123236	0.113532	-0.421818	-0.314572
Dcps	decapping enzyme/ scavenger [Source:MGI Symbol;Acc:MGI:1916555]	NA	NA	0	NA	NA	NA	0	NA	NA	0	0	0	NA	253.205	302.569	246.742	290.306	279.934	275.098	219.32	236.006	0.745764	0.0336468	-0.134191	0.122765	-0.171493	0.0630777	0.0125159	-0.0126254	-0.339532	-0.233747
Dctd	dCMP deaminase [Source:MGI Symbol;Acc:MGI:2444529]	NA	NA	0	NA	NA	NA	0	NA	NA	0	0	0	NA	433.411	561.7	454.073	407.803	607.681	622.542	498.757	441.941	0.822079	0.0122686	-0.199121	0.174942	-0.131933	-0.286986	-0.0175338	0.0173232	-0.302511	-0.476994
Dcun1d5	DCN1/ defective in cullin neddylation 1/ domain containing 5 (S. cerevisiae) [Source:MGI Symbol;Acc:MGI:1924113]	NA	NA	0	NA	NA	NA	0	NA	NA	0	0	0	NA	1722.1	1905.95	1615.03	1721.17	1932.86	1982.22	1693.01	1727.77	0.873022	0.00464321	-0.0750243	0.0713149	-0.167632	-0.075805	-0.0183043	0.018075	-0.20945	-0.180128
Ddias	DNA damage-induced apoptosis suppressor [Source:MGI Symbol;Acc:MGI:1921291]	NA	NA	0	NA	NA	NA	0	NA	NA	0	0	0	NA	1191	1284.58	1187.81	1144.85	1069.95	1304.8	923.627	840.945	0.854047	0.0069468	-0.0555957	0.0535325	-0.0594656	-0.112614	-0.150235	0.136055	-0.362391	-0.49769
Ddx1	DEAD box helicase 1 [Source:MGI Symbol;Acc:MGI:2144727]	NA	NA	0	NA	NA	NA	0	NA	NA	0	0	0	NA	4739.26	4951.52	4313.89	4601.21	4605.36	5082.16	4085.78	4401.29	0.833357	0.0101714	-0.0319517	0.0312593	-0.167625	-0.074599	-0.0728146	0.0693155	-0.245516	-0.138199
Dek	DEK proto-oncogene (DNA binding) [Source:MGI Symbol;Acc:MGI:1926209]	NA	NA	0	AML	oncogene_fusion	T	1	NA	NA	0	1	0	NA	2056.37	2411.37	1360.99	1839.39	2183.76	2441.7	1585.09	1643.14	0.815334	0.0136436	-0.119446	0.110308	-0.714886	-0.280314	-0.082784	0.0782904	-0.545029	-0.49314
Depdc1a	DEP domain containing 1a [Source:MGI Symbol;Acc:MGI:1923381]	NA	NA	0	NA	NA	NA	0	NA	NA	0	0	0	NA	198.542	297.819	91.4574	106.578	179.205	270.751	83.2079	111.864	0.817883	0.013113	-0.321947	0.263047	-1.44022	-1.21948	-0.328173	0.267182	-1.43499	-1.00805
Dgkz	diacylglycerol kinase zeta [Source:MGI Symbol;Acc:MGI:1278339]	NA	NA	0	NA	NA	NA	0	NA	NA	0	0	0	NA	1269.07	1265.99	1171.37	1007.04	1160.06	1218.52	991.758	1029.01	0.818662	0.0129536	0.00175392	-0.00175606	-0.113821	-0.331898	-0.0358994	0.0350277	-0.262039	-0.20884
Dhcr24	24-dehydrocholesterol reductase [Source:MGI Symbol;Acc:MGI:1922004]	NA	NA	0	NA	NA	NA	0	NA	NA	0	0	0	NA	3269.04	3603.63	2796.78	2523.34	3340.74	4521.54	2747.6	2857.87	0.843819	0.00844343	-0.0720043	0.0685808	-0.297103	-0.445535	-0.23478	0.201866	-0.516776	-0.460007
Dhfr	dihydrofolate reductase [Source:MGI Symbol;Acc:MGI:94890]	NA	NA	0	NA	NA	NA	0	NA	NA	0	0	0	NA	286.795	434.976	138.095	179.502	244.712	381.791	143.404	191.182	0.72317	0.0426352	-0.331522	0.269395	-1.38588	-1.00754	-0.356239	0.285463	-1.12723	-0.712372
Dhrs13	dehydrogenase/reductase (SDR family) member 13 [Source:MGI Symbol;Acc:MGI:1917701]	NA	NA	0	NA	NA	NA	0	NA	NA	0	0	0	NA	164.849	166.338	142.929	157.874	148.296	150.241	130.875	126.899	0.91178	0.00160494	-0.00650264	0.00647346	-0.212352	-0.0688769	-0.009429	0.00936777	-0.18972	-0.23423
Diap3	NA	NA	NA	0	NA	NA	NA	0	NA	NA	0	0	0	NA	1217.5	1561.25	458.128	495.202	1000.7	1589.62	444.225	566.904	0.829034	0.0109459	-0.190513	0.168265	-1.60061	-1.48835	-0.372122	0.295552	-1.54376	-1.19195
Dicer1	dicer 1/ ribonuclease type III [Source:MGI Symbol;Acc:MGI:2177178]	UCEC	oncogene	1	sexcord-stromaltumour_TGCT_embryonalrhabdomyosarcoma_pleuropulmonaryblastoma_pituitaryblastoma_Wilmstumour_thyroidcancer_othertumourtypes	TSG	Mis_F_N	1	COREAD_UCEC	LoF	1	1	0	NA	3469.6	3434.71	3170.02	3054.56	3377.92	3593.15	3239.59	3206.87	0.747185	0.0331247	0.00727177	-0.00730861	-0.123006	-0.176535	-0.0452443	0.0438684	-0.10557	-0.120216
Dip2a	disco interacting protein 2 homolog A [Source:MGI Symbol;Acc:MGI:2385920]	NA	NA	0	NA	NA	NA	0	NA	NA	0	0	0	NA	2546.53	2717.35	2055.67	2194.85	2636.13	2648.51	2128.77	2276.81	0.817705	0.0131496	-0.0475933	0.0460732	-0.356515	-0.262001	-0.00338439	0.00337646	-0.311789	-0.214794
Dis3l	DIS3 like exosome 3'-5' exoribonuclease [Source:MGI Symbol;Acc:MGI:2143272]	NA	NA	0	NA	NA	NA	0	NA	NA	0	0	0	NA	975.316	1054.93	957.5	1009.17	1073.8	1058.36	948.964	983.61	0.828878	0.0109746	-0.0577106	0.0554906	-0.0843071	-0.00847998	0.0104132	-0.0104889	-0.167887	-0.116155
Dkc1	dyskeratosis congenita 1/ dyskerin [Source:MGI Symbol;Acc:MGI:1861727]	NA	NA	0	NA	NA	NA	0	NA	NA	0	0	0	NA	978.359	1300.83	726.695	710.173	1036.94	1319.4	702.53	849.936	0.787839	0.020237	-0.220086	0.190913	-0.6491	-0.68228	-0.184218	0.163336	-0.745915	-0.471121
Dlgap5	DLG associated protein 5 [Source:MGI Symbol;Acc:MGI:2183453]	NA	NA	0	NA	NA	NA	0	NA	NA	0	0	0	NA	693.202	917.41	194.47	275.278	525.235	798.914	223.15	284.033	0.780126	0.0223848	-0.216261	0.18803	-2.04999	-1.54865	-0.33403	0.271046	-1.56898	-1.22094
Dna2	DNA replication helicase/nuclease 2 [Source:MGI Symbol;Acc:MGI:2443732]	NA	NA	0	NA	NA	NA	0	NA	NA	0	0	0	NA	98.0819	119.551	70.1708	68.3009	89.3826	107.738	76.001	66.3995	0.733755	0.0382627	-0.149839	0.135731	-0.632956	-0.671921	-0.141015	0.12845	-0.374989	-0.569836
Dnah11	dynein/ axonemal/ heavy chain 11 [Source:MGI Symbol;Acc:MGI:1100864]	NA	NA	0	NA	NA	NA	0	NA	NA	0	0	0	NA	10.7932	10.4427	10.3418	9.886	10.5834	10.5888	9.73245	10.0491	0.861216	0.00600646	0.0236199	-0.024013	-0.0380179	-0.103043	-0.000367346	0.000367252	-0.121298	-0.0751001
Dnaja1	DnaJ heat shock protein family (Hsp40) member A1 [Source:MGI Symbol;Acc:MGI:1270129]	NA	NA	0	NA	NA	NA	0	NA	NA	0	0	0	NA	5694.11	5533.88	5164.43	5555.98	5749.36	5805.89	5521.35	5474.45	0.710634	0.0481885	0.0204426	-0.0207364	-0.120418	-0.0149861	-0.00707531	0.00704078	-0.0654562	-0.0777623
Dnajb7	DnaJ heat shock protein family (Hsp40) member B7 [Source:MGI Symbol;Acc:MGI:1914012]	NA	NA	0	NA	NA	NA	0	NA	NA	0	0	0	NA	6.06273	6.12845	5.82382	6.08348	6.1279	5.92352	5.76381	5.66871	0.826872	0.0113469	-0.00779845	0.00775652	-0.0657997	-0.00286956	0.0242613	-0.0246763	-0.0641082	-0.0881116
Dnajc21	DnaJ heat shock protein family (Hsp40) member C21 [Source:MGI Symbol;Acc:MGI:1925371]	NA	NA	0	NA	NA	NA	0	NA	NA	0	0	0	NA	641.374	620.734	518.084	636.735	595.129	708.847	538.165	529.521	0.766784	0.0264234	0.0234026	-0.0237885	-0.284578	0.0129298	-0.131643	0.120629	-0.276796	-0.300158
Dnajc3	DnaJ heat shock protein family (Hsp40) member C3 [Source:MGI Symbol;Acc:MGI:107373]	NA	NA	0	NA	NA	NA	0	NA	NA	0	0	0	NA	5825.87	5523.23	5241.37	4964.48	5285.43	6314.83	4867.38	5173.23	0.760361	0.0285173	0.0379679	-0.0389942	-0.114563	-0.192863	-0.134065	0.12266	-0.252939	-0.16502
Dnmt1	DNA methyltransferase (cytosine-5) 1 [Source:MGI Symbol;Acc:MGI:94912]	NA	NA	0	NA	NA	NA	0	NA	NA	0	0	1	DM_w	2802.14	3584.31	1517.37	2053.12	2637.17	3297.64	1601.12	1682.46	0.843526	0.00848893	-0.188486	0.166682	-1.07344	-0.637199	-0.170211	0.152232	-0.890122	-0.818635
Dnph1	2'-deoxynucleoside 5'-phosphate N-hydrolase 1 [Source:MGI Symbol;Acc:MGI:3039376]	NA	NA	0	NA	NA	NA	0	NA	NA	0	0	0	NA	105.348	124.911	86.5862	72.2123	106.921	114.998	64.6972	69.8017	0.929619	0.000826233	-0.128097	0.117645	-0.411044	-0.672938	-0.0534876	0.0515752	-0.778252	-0.668694
Dock7	dedicator of cytokinesis 7 [Source:MGI Symbol;Acc:MGI:1914549]	NA	NA	0	NA	NA	NA	0	NA	NA	0	0	0	NA	5875.55	6054.54	5512.24	5877.56	6541.63	6442.04	6013.56	5362.84	0.839179	0.00918451	-0.0218085	0.0214837	-0.113894	-0.0213159	0.0110237	-0.0111086	-0.110408	-0.275629
Dph6	diphthamine biosynthesis 6 [Source:MGI Symbol;Acc:MGI:1913882]	NA	NA	0	NA	NA	NA	0	NA	NA	0	0	0	NA	691.702	661.794	607.174	646.476	696.049	715.281	629.802	602.395	0.924386	0.00102042	0.0315315	-0.0322361	-0.156508	-0.066022	-0.0197945	0.0195266	-0.164083	-0.228272
Dpp9	dipeptidylpeptidase 9 [Source:MGI Symbol;Acc:MGI:2443967]	NA	NA	0	NA	NA	NA	0	NA	NA	0	0	0	NA	1986.28	2024.62	1867.15	1698.9	1864.32	2113.35	1633.95	1746.21	0.837934	0.00939028	-0.0138548	0.013723	-0.103087	-0.239328	-0.0932738	0.0876078	-0.283559	-0.187692
Dpy30	dpy-30/ histone methyltransferase complex regulatory subunit [Source:MGI Symbol;Acc:MGI:1913560]	NA	NA	0	NA	NA	NA	0	NA	NA	0	0	1	ATP-dependent ChRC	421.173	435.276	342.736	363.011	413.46	475.975	332.362	352.062	0.916732	0.00135473	-0.0239554	0.0235642	-0.32127	-0.238355	-0.105141	0.0979965	-0.420134	-0.337059
Dpysl2	dihydropyrimidinase-like 2 [Source:MGI Symbol;Acc:MGI:1349763]	NA	NA	0	NA	NA	NA	0	NA	NA	0	0	0	NA	9496.35	9872.19	6693.82	7576.89	8230	10443.9	6601.01	7611.18	0.767149	0.0263074	-0.0282703	0.027727	-0.532813	-0.354037	-0.182059	0.161637	-0.500265	-0.294833
Dpysl3	dihydropyrimidinase-like 3 [Source:MGI Symbol;Acc:MGI:1349762]	NA	NA	0	NA	NA	NA	0	NA	NA	0	0	0	NA	38036	34742	33774.8	28401.3	37977.9	41172.8	32080.6	32781.3	0.826056	0.0115006	0.0638631	-0.0668216	-0.107556	-0.357546	-0.0594428	0.0570902	-0.3029	-0.27173
Dpysl4	dihydropyrimidinase-like 4 [Source:MGI Symbol;Acc:MGI:1349764]	NA	NA	0	NA	NA	NA	0	NA	NA	0	0	0	NA	165.938	137.088	154.897	147.101	132.133	137.785	115.329	113.858	0.706771	0.0499826	0.131203	-0.14434	0.0318639	-0.0426325	-0.0305281	0.0298954	-0.226762	-0.245281
Drosha	drosha/ ribonuclease type III [Source:MGI Symbol;Acc:MGI:1261425]	NA	NA	0	Wilmstumour_NSCLC_bladdercarcinoma	TSG	A_Mis_N_F	1	LUSC_WT	LoF	1	1	0	NA	2864	2861.99	2638.2	2781.1	2777.98	2813.27	2671.47	2505.27	0.833007	0.0102328	0.000504241	-0.000504417	-0.117971	-0.0418677	-0.00913434	0.00907687	-0.0655368	-0.158207
Dse	dermatan sulfate epimerase [Source:MGI Symbol;Acc:MGI:2443455]	NA	NA	0	NA	NA	NA	0	NA	NA	0	0	0	NA	4171.21	3956.4	3527.55	3728.95	4154.83	4101.89	3600.01	3617.17	0.905466	0.00196516	0.0376349	-0.038643	-0.204165	-0.12406	0.0092193	-0.0092786	-0.197566	-0.190708
Dsn1	DSN1 homolog/ MIS12 kinetochore complex component [Source:MGI Symbol;Acc:MGI:1914184]	NA	NA	0	NA	NA	NA	0	NA	NA	0	0	0	NA	312.872	366.791	288.511	295.786	328.409	291.814	261.907	232.201	0.848753	0.00769812	-0.119246	0.110138	-0.236194	-0.200264	0.0827074	-0.0877388	-0.243731	-0.417412
Dtl	denticleless E3 ubiquitin protein ligase [Source:MGI Symbol;Acc:MGI:1924093]	NA	NA	0	NA	NA	NA	0	NA	NA	0	0	0	NA	487.546	579.376	246.749	279.858	418.867	500.312	247.684	244.946	0.844371	0.00835788	-0.129844	0.119117	-1.11234	-0.930689	-0.133854	0.122483	-0.891847	-0.907883
Dtna	dystrobrevin alpha [Source:MGI Symbol;Acc:MGI:106039]	NA	NA	0	NA	NA	NA	0	NA	NA	0	0	0	NA	369.478	304.087	294.651	251.653	391.118	414.545	271.08	266.146	0.933067	0.000712523	0.133673	-0.147335	-0.192808	-0.420379	-0.0425722	0.0413518	-0.571459	-0.597957
Dtymk	deoxythymidylate kinase [Source:MGI Symbol;Acc:MGI:108396]	NA	NA	0	NA	NA	NA	0	NA	NA	0	0	0	NA	592.763	729.129	484.533	580.166	636.031	724.306	501.736	561.85	0.767178	0.026298	-0.157078	0.141642	-0.447939	-0.188067	-0.096795	0.0907071	-0.438963	-0.275708
Dynlt1a	dynein light chain Tctex-type 1A [Source:MGI Symbol;Acc:MGI:3807506]	NA	NA	0	NA	NA	NA	0	NA	NA	0	0	0	NA	238.678	258.622	196.852	231.234	229.517	233.564	180.62	171.939	0.923796	0.00104404	-0.0590511	0.0567289	-0.337001	-0.10476	-0.0126642	0.012554	-0.358312	-0.429371
Dynlt1b	dynein light chain Tctex-type 1B [Source:MGI Symbol;Acc:MGI:98643]	NA	NA	0	NA	NA	NA	0	NA	NA	0	0	0	NA	405.162	402.969	358.511	399.583	446.65	493.517	371.107	413.304	0.842318	0.00867873	0.00390957	-0.00392019	-0.172572	-0.0160965	-0.0737717	0.0701822	-0.341083	-0.185714
E130309D02Rik	RIKEN cDNA E130309D02 gene [Source:MGI Symbol;Acc:MGI:2442621]	NA	NA	0	NA	NA	NA	0	NA	NA	0	0	0	NA	593.645	589.356	545.762	504.916	539.013	602.222	476.087	536.7	0.724745	0.0419663	0.00522069	-0.00523965	-0.116108	-0.228335	-0.0822047	0.0777721	-0.261299	-0.0884097
E2f1	E2F transcription factor 1 [Source:MGI Symbol;Acc:MGI:101941]	NA	NA	0	NA	NA	NA	0	NA	NA	0	0	0	NA	739.37	801.35	754.834	768.223	754.172	809.326	640.969	616.534	0.852645	0.00714107	-0.0592359	0.0568994	-0.0293739	-0.00400786	-0.0518115	0.0500152	-0.286451	-0.342526
E2f2	E2F transcription factor 2 [Source:MGI Symbol;Acc:MGI:1096341]	NA	NA	0	NA	NA	NA	0	NA	NA	0	0	0	NA	15.9146	19.6292	15.5135	15.8506	17.5953	18.1319	14.9826	15.1119	0.794163	0.0185755	-0.159247	0.143403	-0.196078	-0.165064	-0.0218343	0.0215088	-0.253734	-0.241336
E2f5	E2F transcription factor 5 [Source:MGI Symbol;Acc:MGI:105091]	NA	NA	0	NA	NA	NA	0	NA	NA	0	0	0	NA	445.894	423.712	368.646	323.241	467.33	432.331	360.561	368.917	0.819574	0.0127685	0.0363398	-0.0372789	-0.238125	-0.427753	0.0550614	-0.0572466	-0.319138	-0.286085
E2f7	E2F transcription factor 7 [Source:MGI Symbol;Acc:MGI:1289147]	NA	NA	0	NA	NA	NA	0	NA	NA	0	0	0	NA	425.766	677.838	167.307	159.67	424.637	589.524	180.691	250.573	0.743942	0.034324	-0.374089	0.296789	-1.72165	-1.78906	-0.255985	0.217336	-1.48869	-1.01698
Eci1	enoyl-Coenzyme A delta isomerase 1 [Source:MGI Symbol;Acc:MGI:94871]	NA	NA	0	NA	NA	NA	0	NA	NA	0	0	0	NA	437.952	455.036	447.176	454.392	418.215	405.792	382.048	385.387	0.745881	0.0336037	-0.0278682	0.0273401	0.00220068	0.0252961	0.0215882	-0.0219161	-0.108902	-0.0963466
Ect2	ect2 oncogene [Source:MGI Symbol;Acc:MGI:95281]	NA	NA	0	NA	NA	NA	0	NA	NA	0	0	0	NA	842.018	1266.39	284.38	381.664	732.367	1090.38	330.234	415.024	0.771679	0.0248935	-0.324229	0.264566	-1.89026	-1.46578	-0.315476	0.258717	-1.46455	-1.13485
Eef1b2	eukaryotic translation elongation factor 1 beta 2 [Source:MGI Symbol;Acc:MGI:1929520]	NA	NA	0	NA	NA	NA	0	NA	NA	0	0	0	NA	14721.6	17070.2	13850.4	15138	15373.4	16698	13728.9	14585.8	0.717522	0.0450862	-0.11072	0.102825	-0.198726	-0.0704751	-0.0608506	0.0583875	-0.224075	-0.136727
Efcab11	EF-hand calcium binding domain 11 [Source:MGI Symbol;Acc:MGI:1926017]	NA	NA	0	NA	NA	NA	0	NA	NA	0	0	0	NA	35.9096	38.6145	26.1546	30.0365	32.4393	35.7999	24.8093	25.9754	0.869745	0.00499919	-0.0533359	0.0514342	-0.510642	-0.31099	-0.07286	0.0693566	-0.459718	-0.393453
Eif2a	eukaryotic translation initiation factor 2A [Source:MGI Symbol;Acc:MGI:1098684]	NA	NA	0	NA	NA	NA	0	NA	NA	0	0	0	NA	2173.81	2024.63	1905.98	2091.07	2189.7	2125.85	1991.3	2014.66	0.717518	0.0450881	0.0503736	-0.0521963	-0.139322	-0.005614	0.0211903	-0.0215062	-0.115835	-0.0990094
Eif2s2	eukaryotic translation initiation factor 2/ subunit 2 (beta) [Source:MGI Symbol;Acc:MGI:1914454]	NA	NA	0	NA	NA	NA	0	NA	NA	0	0	0	NA	7827.56	8643.62	7768.49	7868.81	8700.95	9685.12	7918.99	8339.08	0.786501	0.0205998	-0.0733098	0.0697641	-0.0842389	-0.0657261	-0.0793683	0.0752287	-0.215224	-0.140652
Eif3e	eukaryotic translation initiation factor 3/ subunit E [Source:MGI Symbol;Acc:MGI:99257]	NA	NA	0	colorectal	TSG_fusion	T	1	CESC_COREAD	Act	1	1	0	NA	8014.94	8325.38	7254.97	8170.1	8411.61	8388.19	7425.81	7640.3	0.817627	0.0131658	-0.0276728	0.0271519	-0.171394	-1.07259e-05	0.00201025	-0.00201305	-0.177823	-0.136744
Eif4enif1	eukaryotic translation initiation factor 4E nuclear import factor 1 [Source:MGI Symbol;Acc:MGI:1921453]	NA	NA	0	NA	NA	NA	0	NA	NA	0	0	0	NA	2162.58	2053.16	1762.75	1877.74	2050.89	2038.74	1881.5	1683.14	0.797944	0.0176243	0.0369682	-0.0379405	-0.257956	-0.166788	0.00427852	-0.00429125	-0.120086	-0.280817
Elavl4	ELAV like RNA binding protein 4 [Source:MGI Symbol;Acc:MGI:107427]	NA	NA	0	NA	NA	NA	0	NA	NA	0	0	0	NA	17.0807	20.1987	15.6662	17.1301	21.5632	18.6749	15.2266	16.2119	0.854923	0.00682721	-0.12601	0.115883	-0.250722	-0.121847	0.100008	-0.107461	-0.401974	-0.311513
Elovl6	ELOVL family member 6/ elongation of long chain fatty acids (yeast) [Source:MGI Symbol;Acc:MGI:2156528]	NA	NA	0	NA	NA	NA	0	NA	NA	0	0	0	NA	1963.36	1806.53	1418.72	1592.8	2235.77	2516.5	1539.49	1285.37	0.954982	0.000220447	0.0587996	-0.0612983	-0.409929	-0.242961	-0.0878463	0.0828029	-0.626166	-0.886435
Emilin2	elastin microfibril interfacer 2 [Source:MGI Symbol;Acc:MGI:2389136]	NA	NA	0	NA	NA	NA	0	NA	NA	0	0	0	NA	612.273	559.4	316.73	506.882	534.317	709.768	318.615	367.405	0.862514	0.00584547	0.063677	-0.0666178	-0.887245	-0.208848	-0.219318	0.190335	-0.965197	-0.759643
Eno3	enolase 3/ beta muscle [Source:MGI Symbol;Acc:MGI:95395]	NA	NA	0	NA	NA	NA	0	NA	NA	0	0	0	NA	814.816	790.797	585.176	468.591	724.274	1131.72	440.456	602.982	0.844624	0.00831881	0.0214224	-0.0217453	-0.456181	-0.776723	-0.357585	0.286325	-1.07512	-0.622005
Eogt	EGF domain-specific O-linked N-acetylglucosamine (GlcNAc) transferase [Source:MGI Symbol;Acc:MGI:2141669]	NA	NA	0	NA	NA	NA	0	NA	NA	0	0	0	NA	1232.78	1241.52	1078.58	883.584	1227.12	1400.55	1034.05	1029.41	0.813622	0.0140073	-0.00510291	0.00508492	-0.197893	-0.485585	-0.0985079	0.0922095	-0.345481	-0.351967
Ep400	E1A binding protein p400 [Source:MGI Symbol;Acc:MGI:1276124]	NA	NA	0	NA	NA	NA	0	NA	NA	0	0	1		5272.23	5174.35	4730.29	5136.21	5323.47	5190.55	4970.79	4576.46	0.802778	0.0164533	0.0134554	-0.0135821	-0.143032	-0.0242554	0.018125	-0.0183556	-0.0807681	-0.20001
Epb4.1	NA	NA	NA	0	NA	NA	NA	0	NA	NA	0	0	0	NA	1296.56	1264.27	1083.56	1280.73	1306.43	1264.5	1093.55	998.451	0.862606	0.00583421	0.0180778	-0.0183072	-0.240838	0.000349714	0.023339	-0.0237228	-0.233278	-0.364529
Epb4.1l4a	NA	NA	NA	0	NA	NA	NA	0	NA	NA	0	0	0	NA	475.304	429.898	426.143	394.836	459.306	456.269	432.857	322.217	0.722349	0.0429864	0.0706107	-0.0742453	-0.086904	-0.196986	0.00477699	-0.00479286	-0.0807859	-0.506646
Ercc6l	excision repair cross-complementing rodent repair deficiency complementation group 6 like [Source:MGI Symbol;Acc:MGI:2654144]	NA	NA	0	NA	NA	NA	0	NA	NA	0	0	0	NA	384.238	532.57	142.954	173.156	310.216	448.42	146.315	212.767	0.737463	0.0367988	-0.254618	0.216351	-1.68107	-1.40455	-0.290136	0.241444	-1.37433	-0.834136
Eri2	exoribonuclease 2 [Source:MGI Symbol;Acc:MGI:1918401]	NA	NA	0	NA	NA	NA	0	NA	NA	0	0	0	NA	418.222	462.626	368.999	355.061	399.942	443.872	334.298	363.435	0.818257	0.0130364	-0.074624	0.0709531	-0.255279	-0.310827	-0.0771349	0.0732192	-0.335789	-0.215226
Erlin1	ER lipid raft associated 1 [Source:MGI Symbol;Acc:MGI:2387613]	NA	NA	0	NA	NA	NA	0	NA	NA	0	0	0	NA	816.142	1001.77	807.971	805.464	908.169	981.932	842.043	802.762	0.709195	0.0488524	-0.155388	0.140267	-0.169904	-0.174386	-0.0574308	0.0552318	-0.166497	-0.235418
Ermp1	endoplasmic reticulum metallopeptidase 1 [Source:MGI Symbol;Acc:MGI:106250]	NA	NA	0	NA	NA	NA	0	NA	NA	0	0	0	NA	1177.62	1222.9	1137.91	1150.41	1508.05	1284.91	1241.78	1162.98	0.791171	0.0193504	-0.0274703	0.026957	-0.0769645	-0.0611994	0.110891	-0.12013	-0.169383	-0.263966
Esco2	establishment of sister chromatid cohesion N-acetyltransferase 2 [Source:MGI Symbol;Acc:MGI:1919238]	NA	NA	0	NA	NA	NA	0	NA	NA	0	0	0	NA	170.376	247.323	80.5099	107.093	155.477	219.918	78.0309	114.067	0.767149	0.0263073	-0.293739	0.243931	-1.37522	-0.963598	-0.271712	0.228559	-1.26629	-0.71853
Espl1	extra spindle pole bodies 1/ separase [Source:MGI Symbol;Acc:MGI:2146156]	NA	NA	0	NA	NA	NA	0	NA	NA	0	0	0	NA	412.566	586.943	121.529	145.427	356.355	516.138	124.249	158.654	0.827717	0.011189	-0.276596	0.232002	-2.03992	-1.78093	-0.291828	0.242613	-1.81191	-1.45926
Esrrg	estrogen-related receptor gamma [Source:MGI Symbol;Acc:MGI:1347056]	NA	NA	0	NA	NA	NA	0	NA	NA	0	0	0	NA	41.2043	42.7431	41.454	37.0502	38.7584	37.0207	32.8236	35.984	0.72257	0.0428916	-0.0266894	0.0262046	-0.0179744	-0.180003	0.0327089	-0.0334678	-0.207068	-0.0744438
Esyt1	extended synaptotagmin-like protein 1 [Source:MGI Symbol;Acc:MGI:1344426]	NA	NA	0	NA	NA	NA	0	NA	NA	0	0	0	NA	5338.83	4830.03	3884.06	3765.94	5686.41	5057.9	4363.83	4391.12	0.74826	0.0327327	0.0704379	-0.0740543	-0.388519	-0.433077	0.0820175	-0.0869627	-0.299907	-0.290912
Etv6	ets variant 6 [Source:MGI Symbol;Acc:MGI:109336]	NA	NA	0	congenitalfibrosarcoma_multipledifferentleukaemiaandlymphomatumourtypesincludingALL_secretorybreast_MDS	TSG_fusion	T	1	ALL_DLBCL_NHLY	Act	1	1	0	NA	2395.74	2496.61	2091.45	2250.49	2466.96	2459.98	2093.72	1876.56	0.933736	0.000691731	-0.030058	0.0294445	-0.226027	-0.120288	0.00204271	-0.0020456	-0.234626	-0.392604
Evl	Ena-vasodilator stimulated phosphoprotein [Source:MGI Symbol;Acc:MGI:1194884]	NA	NA	0	NA	NA	NA	0	NA	NA	0	0	0	NA	856.88	992.992	716.708	867.52	951.619	827.69	729.25	657.157	0.812314	0.0142892	-0.11026	0.102429	-0.367968	-0.0924568	0.0971388	-0.104155	-0.286831	-0.437006
Exo1	exonuclease 1 [Source:MGI Symbol;Acc:MGI:1349427]	NA	NA	0	NA	NA	NA	0	NA	NA	0	0	0	NA	229.86	273.824	91.1115	95.9202	180.032	209.758	83.1558	117.784	0.742171	0.03499	-0.131763	0.120729	-1.46682	-1.39261	-0.114446	0.106031	-1.22881	-0.726554
Exosc2	exosome component 2 [Source:MGI Symbol;Acc:MGI:2385133]	NA	NA	0	NA	NA	NA	0	NA	NA	0	0	0	NA	458.116	559.068	373.915	382.663	431.447	514.844	353.482	360.23	0.804682	0.0160057	-0.150795	0.136514	-0.443798	-0.410435	-0.133101	0.121852	-0.42065	-0.393368
Exosc8	exosome component 8 [Source:MGI Symbol;Acc:MGI:1916889]	NA	NA	0	NA	NA	NA	0	NA	NA	0	0	0	NA	555.684	682.77	436.978	493.862	539.92	651.337	439.399	462.675	0.782205	0.0217926	-0.156203	0.140931	-0.50291	-0.32636	-0.141667	0.128991	-0.43888	-0.364414
Exph5	exophilin 5 [Source:MGI Symbol;Acc:MGI:2443248]	NA	NA	0	NA	NA	NA	0	NA	NA	0	0	0	NA	1.75026	1.72542	1.72799	1.70661	1.71579	1.7232	1.69254	1.69254	0.799048	0.0173523	0.0102763	-0.01035	-0.00820479	-0.0261672	-0.00311337	0.00310666	-0.0227957	-0.0227946
Fads1	fatty acid desaturase 1 [Source:MGI Symbol;Acc:MGI:1923517]	NA	NA	0	NA	NA	NA	0	NA	NA	0	0	0	NA	3769.39	4363.8	3296.83	3629.86	3967.23	4072.31	2729.23	2891.18	0.951858	0.000268963	-0.109489	0.101763	-0.30274	-0.163908	-0.0189809	0.0187345	-0.558621	-0.475456
Fads2	fatty acid desaturase 2 [Source:MGI Symbol;Acc:MGI:1930079]	NA	NA	0	NA	NA	NA	0	NA	NA	0	0	0	NA	2044.43	2117.29	1662.26	1620.03	1829.3	1979.36	1571.58	1469.38	0.863442	0.00573216	-0.0254802	0.0250379	-0.324035	-0.361165	-0.057993	0.0557516	-0.277069	-0.374082
Faf1	Fas-associated factor 1 [Source:MGI Symbol;Acc:MGI:109419]	NA	NA	0	NA	NA	NA	0	NA	NA	0	0	0	NA	2279.75	2323.5	2106.75	1941.81	2329.23	2521.49	2083.81	2147.63	0.839911	0.00906492	-0.0137748	0.0136446	-0.127633	-0.245248	-0.0583454	0.0560772	-0.218975	-0.175454
Fam111a	family with sequence similarity 111/ member A [Source:MGI Symbol;Acc:MGI:1915508]	NA	NA	0	NA	NA	NA	0	NA	NA	0	0	0	NA	1528.84	1996.49	875.01	1137.71	1434.89	2100.5	960.381	781.069	0.876446	0.00428913	-0.205321	0.179708	-1.01039	-0.631625	-0.300928	0.248863	-0.880188	-1.17835
Fam131c	family with sequence similarity 131/ member C [Source:MGI Symbol;Acc:MGI:2685539]	NA	NA	0	NA	NA	NA	0	NA	NA	0	0	0	NA	7.82477	7.88388	7.79058	7.61219	7.63809	7.65054	7.37984	7.43984	0.892976	0.0028239	-0.00543845	0.00541803	-0.0117559	-0.0451761	-0.00117583	0.00117488	-0.0507983	-0.0391159
Fam132a	NA	NA	NA	0	NA	NA	NA	0	NA	NA	0	0	0	NA	364.614	417.781	366.238	368.03	424.194	402.699	322.307	314.062	0.909403	0.00173497	-0.101527	0.0948492	-0.0951142	-0.0880723	0.037023	-0.0379981	-0.359265	-0.396651
Fam149b	family with sequence similarity 149/ member B [Source:MGI Symbol;Acc:MGI:2145567]	NA	NA	0	NA	NA	NA	0	NA	NA	0	0	0	NA	810.369	767.336	703.92	685.718	752.059	811.602	690.039	581.987	0.871035	0.00485702	0.0388238	-0.0398975	-0.164345	-0.202141	-0.0560099	0.0539164	-0.180178	-0.42587
Fam171b	family with sequence similarity 171/ member B [Source:MGI Symbol;Acc:MGI:2444579]	NA	NA	0	NA	NA	NA	0	NA	NA	0	0	0	NA	734.548	595.742	624.576	583.239	755.931	721.746	643.587	559.503	0.786008	0.0207347	0.143188	-0.158982	-0.0907907	-0.189583	0.0329955	-0.0337678	-0.199123	-0.401112
Fam173b	NA	NA	NA	0	NA	NA	NA	0	NA	NA	0	0	0	NA	218.182	236.408	198.685	199.095	231.655	237.608	205.758	192.231	0.901679	0.00220442	-0.0590352	0.0567142	-0.194085	-0.191111	-0.0184171	0.0181849	-0.189447	-0.287554
Fam57a	NA	NA	NA	0	NA	NA	NA	0	NA	NA	0	0	0	NA	188.602	206.88	183.345	165.613	191.212	223.067	168.671	155.043	0.877273	0.00420635	-0.0682688	0.0651837	-0.109054	-0.255801	-0.11543	0.106875	-0.296393	-0.417935
Fam64a	NA	NA	NA	0	NA	NA	NA	0	NA	NA	0	0	0	NA	229.452	399.885	99.5832	120.183	214.932	317.362	98.3611	119.609	0.792051	0.0191204	-0.45564	0.345752	-1.65986	-1.3886	-0.308342	0.253906	-1.43606	-1.15389
Fam69a	NA	NA	NA	0	NA	NA	NA	0	NA	NA	0	0	0	NA	169.868	179.143	157.841	176.106	191.176	208.879	157.256	177.249	0.808972	0.0150259	-0.0388581	0.0378388	-0.144799	0.0131715	-0.0652952	0.0624675	-0.347087	-0.174417
Fam73a	NA	NA	NA	0	NA	NA	NA	0	NA	NA	0	0	0	NA	305.392	281.759	266.262	298.275	339.3	318.573	208.573	169.182	0.870487	0.0049171	0.0569316	-0.0592709	-0.140888	0.0229109	0.0447539	-0.0461868	-0.65726	-0.959235
Fam83d	family with sequence similarity 83/ member D [Source:MGI Symbol;Acc:MGI:1919128]	NA	NA	0	NA	NA	NA	0	NA	NA	0	0	0	NA	420.726	525.459	214.954	275.334	364.035	458.866	254.727	200.575	0.814842	0.0137474	-0.16924	0.151455	-1.1381	-0.780942	-0.176642	0.157354	-0.691766	-1.03658
Fam92a	NA	NA	NA	0	NA	NA	NA	0	NA	NA	0	0	0	NA	1418.17	1407.54	1233.48	1460.47	1502.41	1564.25	1359.95	1240.45	0.793001	0.0188741	0.00541693	-0.00543734	-0.19588	0.0478227	-0.029393	0.0288061	-0.173119	-0.305802
Fanca	Fanconi anemia/ complementation group A [Source:MGI Symbol;Acc:MGI:1341823]	NA	NA	0		TSG	D_Mis_N_F_S	1	VV	LoF	1	1	0	NA	201.18	313.843	105.19	116.264	240.3	287.283	133.522	147.046	0.757082	0.0296242	-0.35615	0.285406	-1.29164	-1.14723	-0.134561	0.123074	-0.982327	-0.843132
Fancb	Fanconi anemia/ complementation group B [Source:MGI Symbol;Acc:MGI:2448558]	NA	NA	0	NA	NA	NA	0	NA	NA	0	0	0	NA	191.926	204.347	101.217	110.834	147.433	201.418	109.233	114.608	0.743452	0.0345074	-0.0459469	0.0445287	-0.969039	-0.838097	-0.242549	0.20758	-0.675198	-0.605899
Fancd2	Fanconi anemia/ complementation group D2 [Source:MGI Symbol;Acc:MGI:2448480]	NA	NA	0		TSG	D_Mis_N_F	1	CM_COREAD	LoF	1	1	0	NA	154.241	195.911	73.4876	87.7407	126.608	155.745	68.915	90.161	0.760119	0.0285981	-0.182796	0.162218	-1.25241	-0.996661	-0.157133	0.141687	-1.03461	-0.646924
Fance	Fanconi anemia/ complementation group E [Source:MGI Symbol;Acc:MGI:1920025]	NA	NA	0		TSG	N_F_S	1	NA	NA	0	1	0	NA	406.505	451.537	379.124	390.434	405.692	391.599	366.88	341.836	0.797396	0.0177601	-0.077774	0.0737948	-0.178377	-0.135967	0.0252785	-0.0257293	-0.1198	-0.221804
Fanci	Fanconi anemia/ complementation group I [Source:MGI Symbol;Acc:MGI:2384790]	NA	NA	0	NA	NA	NA	0	NA	NA	0	0	0	NA	195.677	223.532	119.853	110.76	184.569	227.039	117.051	134.677	0.810179	0.0147572	-0.0991947	0.092811	-0.806411	-0.920234	-0.157111	0.141669	-0.814131	-0.611772
Fancl	Fanconi anemia/ complementation group L [Source:MGI Symbol;Acc:MGI:1914280]	NA	NA	0	NA	NA	NA	0	NA	NA	0	0	0	NA	126.787	134.002	112.018	104.621	124.801	136.466	107.83	100.096	0.903583	0.00208188	-0.040477	0.0393722	-0.219146	-0.317706	-0.0658917	0.0630132	-0.276766	-0.384139
Faxc	failed axon connections homolog [Source:MGI Symbol;Acc:MGI:1923382]	NA	NA	0	NA	NA	NA	0	NA	NA	0	0	0	NA	1751.66	1715.44	1536.53	1586.86	1701.2	1762.48	1301.61	1380.76	0.978262	2.52635e-05	0.0149955	-0.015153	-0.174055	-0.127553	-0.0257532	0.0253015	-0.412008	-0.326839
Fblim1	filamin binding LIM protein 1 [Source:MGI Symbol;Acc:MGI:1921452]	NA	NA	0	NA	NA	NA	0	NA	NA	0	0	0	NA	3135.95	2945.55	2492.45	2156.43	3339.84	3356.02	2255.73	2201.95	0.962073	0.000132545	0.0444756	-0.0458904	-0.286859	-0.495781	-0.00348984	0.00348141	-0.569678	-0.604491
Fbxo17	F-box protein 17 [Source:MGI Symbol;Acc:MGI:1354707]	NA	NA	0	NA	NA	NA	0	NA	NA	0	0	1		522.893	519.859	390.405	350.24	419.274	519.443	317.858	346.988	0.849092	0.00764866	0.00419074	-0.00420295	-0.417351	-0.573981	-0.162797	0.146275	-0.562306	-0.435803
Fbxo45	F-box protein 45 [Source:MGI Symbol;Acc:MGI:2447775]	NA	NA	0	NA	NA	NA	0	NA	NA	0	0	0	NA	838.643	803.432	727.736	716.545	835.075	776.652	692.178	762.916	0.725463	0.0416636	0.030609	-0.0312725	-0.174033	-0.196391	0.0513703	-0.0532672	-0.219393	-0.0790117
Fbxo48	F-box protein 48 [Source:MGI Symbol;Acc:MGI:2442569]	NA	NA	0	NA	NA	NA	0	NA	NA	0	0	0	NA	34.6656	46.3909	29.4413	31.0818	35.9346	41.4999	28.018	29.0067	0.798976	0.01737	-0.225424	0.194915	-0.461086	-0.382857	-0.107602	0.100131	-0.466626	-0.416589
Fdps	farnesyl diphosphate synthetase [Source:MGI Symbol;Acc:MGI:104888]	NA	NA	0	NA	NA	NA	0	NA	NA	0	0	0	NA	2185.95	2773.82	1906.21	1813.51	2387.32	3057.04	1768.14	2023.74	0.834326	0.0100026	-0.182011	0.1616	-0.379569	-0.451485	-0.189372	0.167374	-0.622527	-0.427741
Fen1	flap structure specific endonuclease 1 [Source:MGI Symbol;Acc:MGI:102779]	NA	NA	0		TSG	_	1	NA	NA	0	1	0	NA	471.093	691.554	323.289	352.023	420.197	581.94	263.927	380.379	0.710863	0.0480833	-0.30333	0.250501	-0.846517	-0.723672	-0.253942	0.215862	-0.924868	-0.39757
Fgf23	fibroblast growth factor 23 [Source:MGI Symbol;Acc:MGI:1891427]	NA	NA	0	NA	NA	NA	0	NA	NA	0	0	0	NA	1.6705	1.66506	1.66419	1.64154	1.67515	1.69981	1.65525	1.64157	0.861446	0.00597779	0.00234992	-0.00235376	-0.00311014	-0.022873	-0.0105824	0.0105053	-0.0278209	-0.0397906
Fgfr1op2	FGFR1 oncogene partner 2 [Source:MGI Symbol;Acc:MGI:1914779]	NA	NA	0	NA	NA	NA	0	NA	NA	0	0	0	NA	2293.68	2335.08	2074.03	2147.29	2402.9	2511.03	2324.51	2179.88	0.798978	0.0173695	-0.0129606	0.0128452	-0.158188	-0.108107	-0.0321025	0.0314037	-0.0799495	-0.172628
Fhl2	four and a half LIM domains 2 [Source:MGI Symbol;Acc:MGI:1338762]	NA	NA	0	NA	NA	NA	0	NA	NA	0	0	0	NA	5005.83	5063.28	4856.22	4676.7	5707.7	5420.33	4898.94	4236.31	0.873754	0.00456607	-0.00825455	0.00820759	-0.052031	-0.106373	0.0367835	-0.037746	-0.183657	-0.393317
Fignl1	fidgetin-like 1 [Source:MGI Symbol;Acc:MGI:1890648]	NA	NA	0	NA	NA	NA	0	NA	NA	0	0	0	NA	328.904	522.844	153.826	192.995	302.491	421.713	133.984	185.857	0.810991	0.014578	-0.37276	0.295954	-1.46912	-1.14186	-0.259503	0.219865	-1.43434	-0.962203
Fkbp11	FK506 binding protein 11 [Source:MGI Symbol;Acc:MGI:1913370]	NA	NA	0	NA	NA	NA	0	NA	NA	0	0	0	NA	412.766	411.181	345.24	340.019	350.509	417.272	278.601	306.536	0.907118	0.00186631	0.00277276	-0.0027781	-0.254952	-0.276939	-0.131244	0.120293	-0.462492	-0.32464
Fkbp2	FK506 binding protein 2 [Source:MGI Symbol;Acc:MGI:95542]	NA	NA	0	NA	NA	NA	0	NA	NA	0	0	1		544.102	516.024	487.87	512.952	474.279	538.063	441.45	473.778	0.719676	0.0441415	0.0377138	-0.0387262	-0.119667	-0.0473398	-0.0938879	0.0881494	-0.197376	-0.0954143
Fkbp3	FK506 binding protein 3 [Source:MGI Symbol;Acc:MGI:1353460]	NA	NA	0	NA	NA	NA	0	NA	NA	0	0	0	NA	1564.74	1659.74	1334.01	1581.18	1752.59	1840.78	1314.97	1349.66	0.921161	0.00115377	-0.0431426	0.0418898	-0.273301	-0.0280618	-0.0358503	0.0349809	-0.450308	-0.412739
Fkbp4	FK506 binding protein 4 [Source:MGI Symbol;Acc:MGI:95543]	NA	NA	0	NA	NA	NA	0	NA	NA	0	0	0	NA	2512.44	2787.62	1914.79	2226.83	2247.43	2297.13	1835.2	1960.67	0.71917	0.0443623	-0.0769209	0.0730264	-0.468823	-0.251016	-0.0158648	0.0156922	-0.308202	-0.212792
Fkrp	fukutin related protein [Source:MGI Symbol;Acc:MGI:2447586]	NA	NA	0	NA	NA	NA	0	NA	NA	0	0	0	NA	932.853	993.339	924.251	857.634	981.576	1036.08	821.238	812.294	0.942163	0.000462951	-0.0460295	0.0446062	-0.0593947	-0.167317	-0.0395061	0.0384531	-0.296805	-0.312604
Fxn	frataxin [Source:MGI Symbol;Acc:MGI:1096879]	NA	NA	0	NA	NA	NA	0	NA	NA	0	0	0	NA	100.288	110.382	86.4444	94.0868	110.035	98.6756	76.4294	87.8005	0.876085	0.0043256	-0.0708351	0.0675194	-0.285138	-0.162919	0.0764593	-0.0807393	-0.449306	-0.249203
Fzr1	fizzy and cell division cycle 20 related 1 [Source:MGI Symbol;Acc:MGI:1926790]	NA	NA	0	NA	NA	NA	0	NA	NA	0	0	0	NA	1057.42	1140.2	803.684	869.806	1044.43	1102.97	872.192	888.844	0.76423	0.0272443	-0.0553917	0.0533433	-0.451243	-0.337177	-0.0398757	0.0388031	-0.299869	-0.272585
Gabra4	gamma-aminobutyric acid (GABA) A receptor/ subunit alpha 4 [Source:MGI Symbol;Acc:MGI:95616]	NA	NA	0	NA	NA	NA	0	NA	NA	0	0	0	NA	129.418	162.923	103.207	116.034	128.996	131.435	83.6735	83.6878	0.93526	0.00064586	-0.175619	0.156542	-0.502108	-0.333103	-0.0135768	0.0134503	-0.638059	-0.637813
Gapvd1	GTPase activating protein and VPS9 domains 1 [Source:MGI Symbol;Acc:MGI:1913941]	NA	NA	0	NA	NA	NA	0	NA	NA	0	0	0	NA	3791.44	3923.81	3679.17	3617.98	3703.04	4043.69	3553.87	3486.63	0.851079	0.00736205	-0.0249666	0.0245419	-0.0683344	-0.0925299	-0.0648779	0.0620855	-0.124197	-0.151754
Gatc	glutamyl-tRNA(Gln) amidotransferase/ subunit C [Source:MGI Symbol;Acc:MGI:1923776]	NA	NA	0	NA	NA	NA	0	NA	NA	0	0	0	NA	441.029	467.117	435.101	449.149	474.018	529.173	445.059	425.353	0.816748	0.0133477	-0.0420513	0.0408603	-0.0615719	-0.0157287	-0.0815827	0.0772151	-0.172528	-0.237864
Gatm	glycine amidinotransferase (L-arginine:glycine amidinotransferase) [Source:MGI Symbol;Acc:MGI:1914342]	NA	NA	0	NA	NA	NA	0	NA	NA	0	0	0	NA	84.7275	71.5994	56.5117	59.4124	60.7332	78.0556	49.9054	48.4321	0.848698	0.00770632	0.116336	-0.126546	-0.467943	-0.395731	-0.192334	0.169683	-0.475625	-0.518855
Gcat	glycine C-acetyltransferase (2-amino-3-ketobutyrate-coenzyme A ligase) [Source:MGI Symbol;Acc:MGI:1349389]	NA	NA	0	NA	NA	NA	0	NA	NA	0	0	0	NA	171.164	196.669	134.997	169.807	204.145	185.793	140.313	147.732	0.864766	0.00557286	-0.10367	0.0967175	-0.446127	-0.115157	0.0663507	-0.06955	-0.474593	-0.400266
Gcfc2	GC-rich sequence DNA binding factor 2 [Source:MGI Symbol;Acc:MGI:2141656]	NA	NA	0	NA	NA	NA	0	NA	NA	0	0	0	NA	270.536	263.024	241.937	245.376	262.507	263.133	253.718	214.416	0.756434	0.029846	0.0201692	-0.0204552	-0.141021	-0.120654	-0.0017178	0.00171576	-0.0508466	-0.293666
Gemin2	gem nuclear organelle associated protein 2 [Source:MGI Symbol;Acc:MGI:1913853]	NA	NA	0	NA	NA	NA	0	NA	NA	0	0	0	NA	178.321	179.085	144.101	141.538	167.9	159.821	141.343	130.222	0.824304	0.011835	-0.00308799	0.0030814	-0.310476	-0.336374	0.0351329	-0.0360098	-0.213265	-0.331496
Gen1	GEN1/ Holliday junction 5' flap endonuclease [Source:MGI Symbol;Acc:MGI:2443149]	NA	NA	0	NA	NA	NA	0	NA	NA	0	0	0	NA	196.38	248.621	93.6202	99.9519	163.593	245.263	80.7633	117.329	0.807345	0.0153931	-0.180161	0.16014	-1.24892	-1.1545	-0.321483	0.262737	-1.33982	-0.80104
Ghrh	growth hormone releasing hormone [Source:MGI Symbol;Acc:MGI:95709]	NA	NA	0	NA	NA	NA	0	NA	NA	0	0	0	NA	1.38147	1.37743	1.37663	1.35789	1.39492	1.38216	1.3579	1.35791	0.903735	0.00207226	0.00210993	-0.00211302	-0.00295302	-0.0227282	0.00661413	-0.0066446	-0.032184	-0.0321831
Gimap6	GTPase/ IMAP family member 6 [Source:MGI Symbol;Acc:MGI:1918876]	NA	NA	0	NA	NA	NA	0	NA	NA	0	0	0	NA	9.17799	9.26477	9.58948	9.1143	9.63687	10.6505	8.82067	8.74466	0.752941	0.0310596	-0.00680428	0.00677234	0.05647	-0.0168508	-0.0739461	0.07034	-0.201622	-0.214108
Gins1	GINS complex subunit 1 (Psf1 homolog) [Source:MGI Symbol;Acc:MGI:1916520]	NA	NA	0	NA	NA	NA	0	NA	NA	0	0	0	NA	87.0188	100.367	58.3601	60.3039	80.2512	91.2516	59.7239	57.3594	0.820809	0.0125205	-0.106613	0.0992737	-0.682958	-0.635689	-0.095638	0.0896902	-0.521851	-0.580131
Gins2	GINS complex subunit 2 (Psf2 homolog) [Source:MGI Symbol;Acc:MGI:1921019]	NA	NA	0	NA	NA	NA	0	NA	NA	0	0	0	NA	362.808	433.766	202.523	245.698	290.04	362.056	199.918	230.191	0.737612	0.0367409	-0.134603	0.123109	-0.975722	-0.696924	-0.168832	0.151128	-0.705674	-0.502252
[truncated: 700 more rows]

## Sheet: Suppl_Table_S3
PTM_RNA_Protein-Level_Up															Normalized RNA-seq read count values								PTM significance		Log2 transformed normalized RNA-seq read count values
[truncated: 1,458 more rows]

[truncated: 11 more sheets: Suppl_Table_S4, Suppl_Table_S5, Suppl_Table_S6, Suppl_Table_S7, Suppl_Table_S8, Suppl_Table_S9, Suppl_Table_S10, Suppl_Table_S11, Suppl_Table_S12, Suppl_Table_S13, Suppl_Table_S14]
